# Supplementary material
Source: Research Square preprint supplement (doi:10.21203/rs.3.rs-8928116/v1)
Supplement: Supplementary file 1 [file e169d19f2c7238e6c24f7920.xlsx]

## Sheet: TOC
Supplementary Tables		Description
S1	List of 15 publicly available genomes of Sodalinema from various habitats, and 4 genomes as outgroup
S2	Amplicon sequencing results for each consortium at different time points - T=0, T=120, and T=390 days
S3	Alpha and beta diversity metrics for microbial mat communities across enrichment timepoints
S4	Taxonomic assignments and quality metrics for MAGs reconstructed from the long- and short-read sequencing of Deer Lake (DL) consortium
S5	Taxonomic assignments and quality metrics for MAGs reconstructed from the long- and short-read sequencing of Probe Lake (PL) consortium
S6	Taxonomic assignments and quality metrics for MAGs reconstructed from the long- and short-read sequencing of Goodenough Lake (GE) consortium
S7	Taxonomic assignments and relative abundance (%) of the MAGs when mapped to short-reads of all three consortia	Merged data for figure 3b
S8	Average fraction of transcriptome values (%) of clustered genes identified from Sodalinema MAGs generated during this study. Central ID respents the database and similar ID represents the clustered gene (98% match)	Raw data
S9	Biosynthetic gene clusters identified via antiSMASH in three Sodalinema MAGs generated in this study
S10	Average fraction of transcriptome values (%) of vitamins, cofactors, and biosynthetic gene clusters identified in Sodalinema MAGs generated during this study	Data for figure 5b
S11	Genes associated with the zeaxanthin biosynthesis pathway identified in Sodalinema MAGs from this study.	Data for figure S4
S12	Genes associated with the various complete nucleotide biosynthesis pathways identified in Sodalinema MAGs from this study.
S13	Genes associated with complete amino acid biosynthesis pathway identified in Sodalinema MAGs from this study.
S14	Genes associated with various cofactor and vitamin biosynthesis complete pathway identified in Sodalinema MAGs and heterotrophs from this study and comparing these pathways to Sodalinema yuhuli - an isolate
S15	Average fraction of transcriptome values (%) of clustered genes identified from Roseinatronobacter MAGs generated during this study. Central ID respents the database and similar ID represents the clustered gene (98% match)	Raw data
S16	Biosynthetic gene clusters identified via antiSMASH in two Roseinatronobacter MAGs generated in this study
S17	Average fraction of transcriptome values (%) of vitamins, cofactors, and biosynthetic gene clusters identified in Roseinatronobacter MAGs generated during this study	Data for figure S8
S18	Average fraction of transcriptome values (%) of clustered genes identified from Alkalimonas MAGs generated during this study. Central ID respents the database and similar ID represents the clustered gene (98% match)	Raw data
S19	Biosynthetic gene clusters identified via antiSMASH in two Alkalimonas MAGs generated in this study
S20	Average fraction of transcriptome values (%) of vitamins, cofactors, and biosynthetic gene clusters identified in Alkalimonas MAGs generated during this study	Data for figure S9
S21	Average fraction of transcriptome values (%) of clustered genes identified from Kiloiellales MAGs from PL consortium generated during this study. Central ID respents the database and similar ID represents the clustered gene (98% match)	Raw data
S22	Biosynthetic gene clusters identified via antiSMASH in two Kiloniellales MAGs from PL cosortium generated in this study
S23	Average fraction of transcriptome values (%) of vitamins, cofactors, and biosynthetic gene clusters identified in Kiloiellales MAGs generated during this study	Data for figure S10

## Sheet: S1
ID	NCBI Names	GTDB classification	Name corresponding on tree	Accession	Completeness (%)	Contamination (%)	Habitat	Geographic location
GCA_001657325	Geitlerinema sp. BBD 1991-9	Geitlerinema sp001657325	Geitlerinema sp. BBD 1991 9	GCA_001657325.1	100	0.14	Marine	USA: Black band disease microbial mat
GCA_017746765	Cyanobacteria bacterium SBC	Geitlerinema sp001657325	Geitlerinema sp001657325	GCA_017746765.1	99.99	0.11	Marine	USA:Cyanobacterial mat on coral surface
GCA_049974805	Baaleninema sp. E05-001	Baaleninema; s__	Baaleninema sp.	GCF_049974805.1	100	0	Hotsprings	Russia: Dagestan
GCF_000332355	Baaleninema simplex PCC 7105	Baaleninema simplex	Baaleninema simplex	GCA_000332355.1	98.47	0.06	Unknown	USA
GCA_001314905	Phormidium sp. OSCR	Sodalinema sp001314905	Sodalinema sp001314905	GCA_001314905.1	100	0.02	Marine	USA: Hot Lake
GCA_001637315	Phormidium willei BDU 130791	Sodalinema willei_A	Sodalinema willei	GCA_001637315.1	91.93	2.94	Marine	India: Kakinada; Andhra Pradesh
GCF_900149785	Phormidium lacuna	Sodalinema willei_A	Sodalinema lacuna	GCA_900149785.2	99.99	0.19	Marine	Rockpool of the North Sea
GCA_004299065	Phormidium sp. SL48-SHIP	Sodalinema sp007693465	Sodalinema sp. SL48-SHIP	GCA_004299065.1	96.67	0.31	Marine	Russia: Kulunda Steppe
GCF_046483825	Sodalinema sp. BLK5-1.bin.222	Sodalinema sp004299065	Sodalinema sp. BLK5-1.bin.222	GCF_046483825.1	96.13	1.37	Soda lakes	China: Tianshan Mountain, Xinjiang, Barkol Lake
GCA_011390555	Phormidium sp. S10.Bin050	Sodalinema sp004299065	Sodalinema sp. S10.Bin050	GCA_011390555.1	95.11	0	Sediment	China: Tibetan lacustrine sediment
GCA_007126595	Phormidium sp. CSSed162cmB_426	Sodalinema sp007126595	MAG_GCA_007126595	GCA_007126595.1	75.03	0.03	Soda lakes	Russia: Kulunda Steppe
GCA_007131565	Phormidium sp. CSSed165cm_523	Sodalinema sp007126595	MAG_GCA_007131565	GCA_007131565.1	87.73	0	Soda lakes	Russia: Kulunda Steppe
GCF_012911965	Geitlerinema sp. P-1104	Sodalinema sp007126595	MAG_GCF_012911965	GCF_012911965.1	93.31	1.61	Soda lakes	Russia: Kulunda Steppe
GCA_003566575	Cyanobacteria bacterium T3Sed10_304	Sodalinema sp007126595	MAG_GCA_003566575	GCA_003566575.1	84.94	2.1	Soda lakes	Russia: Kulunda Steppe
GCA_023983615	Phormidium yuhuli AB48	Sodalinema yuhuli	Sodalinema yuhuli	GCA_023983615.1	100	0.05	Soda lakes	Canada: Vancouver
GCA_020386575	Phormidium sp. PBR-2020	Sodalinema sp007693465	Ca. S. alkaliphilum	GCA_020386575.1	100	0	Soda lakes	Canada: Vancouver
GCA_020832215	Phormidium sp. BM_Day4_Bin.17	Sodalinema sp007693465	MAG_GCA_020832215	GCA_020832215.1	100	0	Soda lakes	Canada: Vancouver
GCA_007693465	Phormidium sp. GEM2.Bin31	Sodalinema sp007693465	MAG_GCA_007693465	GCA_007693465.1	86.8	0.75	Soda lakes	Canada: Vancouver
GCA_009846485	Sodalinema gerasimenkoae IPPAS B-353	Sodalinema gerasimenkoae	Sodalinema gerasimenkoae	GCA_009846485.1	99.99	0	Soda lakes	Russia: Transbaikal Region

## Sheet: S2
OTUID	Arb-silva taxonomy	NCBI Taxonomy	Percentage Identity	DL-T0(%)	DL-T120(%)	DL-T390(%)	GE-T0(%)	GE-T120(%)	GE-T390(%)	PL-T0(%)	PL-T390(%)
OTU_1	Bacteria(100);Cyanobacteria(100);Cyanobacteriia(100);Cyanobacteriales(100);Cyanobacteriaceae(100);Cyanobacterium_PCC-7202(100);	Bacteria~Cyanobacteriota~Cyanobacteriia~Cyanobacteriales~Cyanobacteriaceae~Cyanobacterium~Cyanobacterium	98.857	0.0536	0.0252	32.9039	0	0.6467	0	2.1777	0.0069
OTU_10	Bacteria(100);Proteobacteria(100);Gammaproteobacteria(100);Gammaproteobacteria(100);Gammaproteobacteria(100);Gammaproteobacteria(100);	Bacteria~Pseudomonadota~Gammaproteobacteria~Xanthomonadales~Xanthomonadaceae~Rehaibacterium~Rehaibacterium	99.429	0	0.0084	3.4474	0	0	0.0018	0.0276	0.0011
OTU_100	Bacteria(100);Bacteria(100);Bacteria(100);Bacteria(100);Bacteria(100);Bacteria(100);	Bacteria~Pseudomonadota~Alphaproteobacteria~Sphingomonadales~Sphingomonadaceae~Allosphingosinicella~Allosphingosinicella	98.54	0	0.0545	0.0537	0.4505	0.1166	0.05	0.0207	0
OTU_1000	Bacteria(100);Firmicutes(89);Firmicutes(89);Firmicutes(89);Firmicutes(89);Firmicutes(89);	Bacteria~Bacillota_B~Thermincolia~Thermincolales~Thermincolaceae~Thermincola~Thermincola	88.796	0.0179	0	0	0	0	0	0.0069	0
OTU_1001	Bacteria(100);Bacteroidota(100);Bacteroidia(100);Flavobacteriales(100);Crocinitomicaceae(100);Crocinitomicaceae(100);	Bacteria~Bacteroidota~Bacteroidia~Flavobacteriales~Crocinitomicaceae~Brumimicrobium~Brumimicrobium	99.714	0.0045	0	0.0004	0	0	0.0054	0	0.0011
OTU_1004	Bacteria(100);Planctomycetota(94);Phycisphaerae(94);Phycisphaerales(94);Phycisphaeraceae(94);uncultured(83);	Bacteria~Planctomycetota~Phycisphaerae~Phycisphaerales~Phycisphaeraceae~JAFIFY01~JAFIFY01	99.714	0.0045	0	0	0.2252	0	0	0.0413	0
OTU_1009	Bacteria(100);Bdellovibrionota(100);Bdellovibrionia(100);Bdellovibrionales(100);Bdellovibrionaceae(100);Bdellovibrio(100);	Bacteria~Bdellovibrionota~Bdellovibrionia~Bdellovibrionales~UBA6776~G023898385~G023898385	99.143	0.0045	0	0	0	0	0	0.0345	0
OTU_101	Bacteria(100);Verrucomicrobiota(100);Verrucomicrobiae(100);Opitutales(100);Puniceicoccaceae(100);Verruc-01(100);	Bacteria~Verrucomicrobiota~Verrucomicrobiae~Opitutales~Verruco-01~JAFIGG01~JAFIGG01	87.037	0.0089	0.0378	0.0672	0	0.0159	0	0.0138	0.0057
OTU_1010	Bacteria(100);Proteobacteria(100);Gammaproteobacteria(100);Gammaproteobacteria(100);Gammaproteobacteria(100);Gammaproteobacteria(100);	Bacteria~Pseudomonadota~Gammaproteobacteria~Pseudomonadales~Halomonadaceae~Halomonas_E~Halomonas_E	97.714	0.0089	0.0042	0	0	0	0.0054	0.0276	0
OTU_1011	Bacteria(99);Cyanobacteria(96);Cyanobacteriia(96);Chloroplast(95);Chloroplast_fa(95);Chloroplast_ge(95);	Bacteria~Cyanobacteriota~Cyanobacteriia~Phormidesmiales~Phormidesmiaceae~Phormidesmis~Phormidesmis	92.877	0	0	0	0.4505	0	0	0	0
OTU_1014	Bacteria(100);Proteobacteria(89);Alphaproteobacteria(84);Alphaproteobacteria(84);Alphaproteobacteria(84);Alphaproteobacteria(84);	Bacteria~Pseudomonadota~Alphaproteobacteria~UBA1280~RI-95~RI-95~RI-95	99.143	0	0	0	0.2252	0	0	0.0069	0
OTU_1017	Bacteria(100);Deinococcota(100);Deinococci(100);Deinococcales(100);Trueperaceae(100);Truepera(100);	Bacteria~Deinococcota~Deinococci~Deinococcales~Trueperaceae~JAABTL01~JAABTL01	92.236	0.0223	0	0	0	0	0	0	0
OTU_1018	Bacteria(99);Bacteroidota(98);Bacteroidia(98);Bacteroidia(98);Bacteroidia(98);Bacteroidia(98);	Bacteria~Pseudomonadota~Gammaproteobacteria~Burkholderiales~Burkholderiaceae~Polynucleobacter~Polynucleobacter	97.429	0	0	0	0	0	0	0.0207	0
OTU_1019	Bacteria(100);Verrucomicrobiota(100);Verrucomicrobiae(100);Opitutales(100);Puniceicoccaceae(100);Lentimonas(100);	Bacteria~Verrucomicrobiota~Verrucomicrobiae~Opitutales~DSM-45221~UBA7441~UBA7441	99.714	0	0	0	0	0.0053	0	0.0207	0
OTU_102	Bacteria(100);Actinobacteriota(100);Actinobacteria(100);Nitriliruptorales(100);Nitriliruptoraceae(100);Egicoccus(100);	Bacteria~Actinomycetota~Actinomycetia~Nitriliruptorales~Nitriliruptoraceae~Egicoccus~Egicoccus	93.429	0.0894	0	0.0466	0	0	0	0.0138	0
OTU_1020	Bacteria(100);Proteobacteria(100);Gammaproteobacteria(100);Gammaproteobacteria_Incertae_Sedis(81);Unknown_Family(81);Unknown_Family(81);	Bacteria~Pseudomonadota~Gammaproteobacteria~Xanthomonadales~Wenzhouxiangellaceae~GCA-2722315~GCA-2722315	97.714	0	0	0	0	0	0	0.0138	0
OTU_1021	Bacteria(100);Verrucomicrobiota(93);Verrucomicrobiae(93);Opitutales(92);Puniceicoccaceae(87);Puniceicoccaceae(87);	Bacteria~Verrucomicrobiota~Verrucomicrobiae~Opitutales~DSM-45221~WN38~WN38	99.714	0	0	0	0	0	0	0.0138	0
OTU_1023	Eukaryota(100);Chlorophyta_ph(100);Chlorophyceae(98);Chlorophyceae_or(97);Chlorophyceae_fa(97);Chlorophyceae_ge(97);	Bacteria~Chloroflexota~Limnocylindria~Limnocylindrales~CSP1-4~C-114~C-114	92.857	0.0089	0	0	0	0	0	0	0
OTU_1025	Bacteria(100);Spirochaetota(83);Spirochaetia(83);Spirochaetales(83);Spirochaetaceae(83);Spirochaetaceae(83);	Bacteria~Spirochaetota~Spirochaetia~DSM-27196~SKKC01~SKKC01~SKKC01	99.429	0	0	0	0	0	0	0	0.0057
OTU_1027	Bacteria(100);Proteobacteria(100);Gammaproteobacteria(100);Gammaproteobacteria(100);Gammaproteobacteria(100);Gammaproteobacteria(100);	Bacteria~Pseudomonadota~Gammaproteobacteria~Xanthomonadales~Xanthomonadaceae~Rehaibacterium~Rehaibacterium	97.143	0.0045	0.0084	0.0004	0	0	0	0	0
OTU_1029	unknown;unknown(0);unknown(0);unknown(0);unknown(0);unknown(0);			0	0	0	0	0	0	0.0138	0
OTU_1030	Bacteria(100);Verrucomicrobiota(100);Verrucomicrobiae(100);Opitutales(100);Opitutales(100);Opitutales(100);	Bacteria~Verrucomicrobiota~Verrucomicrobiae~Opitutales~T3Sed10-336~JAIUMY01~JAIUMY01	85.47	0	0	0.0004	0.2252	0	0	0.0138	0.0034
OTU_1031	Archaea(100);Halobacterota(100);Halobacteria(100);Halobacterales(100);Halobacterales_fa(100);uncultured(100);	Archaea~Halobacteriota~Halobacteria~Halobacteriales~Haloarculaceae~Natronomonas~Natronomonas	99.714	0.0089	0	0	0	0	0	0	0
OTU_1033	Bacteria(100);Chloroflexi(100);Anaerolineae(100);SBR1031(100);A4b(100);A4b_ge(100);	Bacteria~Chloroflexota~Anaerolineae~Aggregatilineales~Phototrophicaceae~OLB13~OLB13	92.286	0.0045	0	0	0	0	0	0.0138	0.0046
OTU_1035	Bacteria(100);Proteobacteria(100);Alphaproteobacteria(100);Alphaproteobacteria(100);Alphaproteobacteria(100);Alphaproteobacteria(100);	Bacteria~Pseudomonadota~Alphaproteobacteria~Azospirillales~Azospirillaceae~Azospirillum~Azospirillum	96.286	0	0	0	0	0	0	0.0207	0
OTU_104	Bacteria(100);Cyanobacteria(100);Cyanobacteriia(100);Phormidesmiales(100);Nodosilineaceae(100);Nodosilinea_PCC-7104(94);	Bacteria~Cyanobacteriota~Cyanobacteriia~Phormidesmiales~Phormidesmiaceae~Nodosilinea~Nodosilinea	99.714	0.1967	0.0168	0	5.4054	0.4028	0	0.1998	0.063
OTU_1049	Eukaryota(100);Chlorophyta_ph(94);Chlorophyta_ph(94);Chlorophyta_ph(94);Chlorophyta_ph(94);Chlorophyta_ph(94);	Bacteria~Chloroflexota~Limnocylindria~Limnocylindrales~CSP1-4~C-114~C-114	98.857	0.0089	0	0	0	0	0	0	0
OTU_105	Bacteria(100);Proteobacteria(100);Alphaproteobacteria(100);Caulobacterales(100);Hyphomonadaceae(100);Hyphomonas(100);	Bacteria~Pseudomonadota~Alphaproteobacteria~Caulobacterales~Hyphomonadaceae~Hyphomonas~Hyphomonas	99.714	0	0.2853	0	0	0.0901	0	0.2481	0
OTU_1052	Bacteria(100);Proteobacteria(100);Gammaproteobacteria(100);Oceanospirillales(100);Nitrincolaceae(100);Nitrincola(100);	Bacteria~Pseudomonadota~Gammaproteobacteria~Pseudomonadales~Nitrincolaceae~Nitrincola~Nitrincola	98	0.0268	0.0126	0	0	0	0	0.0069	0
OTU_1053	Bacteria(100);Bdellovibrionota(100);Bdellovibrionia(100);Bdellovibrionales(100);Bdellovibrionaceae(100);Bdellovibrio(100);	Bacteria~Bdellovibrionota~Bdellovibrionia~Bdellovibrionales~UBA6776~JADZEO01~JADZEO01	98.571	0.0134	0	0	0	0	0	0	0
OTU_1054	Bacteria(100);Patescibacteria(99);Gracilibacteria(99);JGI_0000069-P22(99);JGI_0000069-P22_fa(99);JGI_0000069-P22_ge(99);	Bacteria~Patescibacteria~JAEDAM01~BD1-5~UBA6164~JAACSU01~JAACSU01	99.714	0.0045	0	0	0	0	0	0.0207	0
OTU_1056	Bacteria(100);Proteobacteria(96);Alphaproteobacteria(96);Alphaproteobacteria(96);Alphaproteobacteria(96);Alphaproteobacteria(96);	Bacteria~Pseudomonadota~Alphaproteobacteria~JAGPBS01~JAGPBS01~JAGPBS01~JAGPBS01	98.286	0	0	0	0	0	0	0.0138	0
OTU_1058	Bacteria(100);Actinobacteriota(100);Acidimicrobiia(100);Microtrichales(99);Microtrichales(99);Microtrichales(99);	Bacteria~Actinomycetota~Acidimicrobiia~Acidimicrobiales~SKKL01~Actinomarinicola~Actinomarinicola	95.429	0.0089	0	0	0.2252	0	0.0054	0.0069	0.0023
OTU_1059	Bacteria(100);Bacteroidota(100);Bacteroidia(100);Bacteroidales(97);ML635J-40_aquatic_group(96);ML635J-40_aquatic_group_ge(96);	Bacteria~Chloroflexota~Chloroflexia~Chloroflexales~Chloroflexaceae~Chloroploca~Chloroploca	99.714	0.0089	0	0	0	0	0	0	0
OTU_1060	Eukaryota(89);Eukaryota(89);Eukaryota(89);Eukaryota(89);Eukaryota(89);Eukaryota(89);			0	0	0	0	0	0	0	0.0023
OTU_1062	Bacteria(100);Proteobacteria(99);Alphaproteobacteria(99);Micavibrionales(92);Micavibrionales(92);Micavibrionales(92);	Bacteria~Verrucomicrobiota~Kiritimatiellia~RZYC01~RZZM01~RZZM01~RZZM01	90.909	0	0	0	0	0	0	0.0276	0
OTU_1064	Bacteria(100);Firmicutes(100);Dethiobacteria(100);Dethiobacterales(100);Dethiobacteraceae(100);uncultured(100);	Bacteria~Bacillota_D~Dethiobacteria~Dethiobacterales~Dethiobacteraceae~Dethiobacter~Dethiobacter	99.714	0.0313	0	0	0	0	0	0.0482	0
OTU_1065	Bacteria(100);Proteobacteria(100);Alphaproteobacteria(100);Caulobacterales(100);Hyphomonadaceae(100);Oceanicaulis(100);	Bacteria~Pseudomonadota~Alphaproteobacteria~Caulobacterales~Maricaulaceae~Oceanicaulis~Oceanicaulis	99.143	0	0	0.0007	0	0.0053	0.0054	0	0
OTU_1066	Bacteria(100);Spirochaetota(100);Spirochaetia(100);Spirochaetales(100);Spirochaetaceae(100);Spirochaetaceae(100);	Bacteria~Spirochaetota~Spirochaetia~DSM-27196~SKKC01~SKKC01~SKKC01	99.429	0.0045	0	0	0	0	0	0.124	0
OTU_1067	Bacteria(100);Bdellovibrionota(96);Oligoflexia(96);Oligoflexales(96);uncultured(80);uncultured_ge(80);	Bacteria~Bdellovibrionota~Oligoflexia~Oligoflexales~JAGOVF01~JAGOVF01~JAGOVF01	93.75	0.0045	0	0	0	0	0	0.0207	0
OTU_1069	Bacteria(100);Firmicutes(100);Clostridia(100);Peptostreptococcales-Tissierellales(100);Peptostreptococcaceae(100);Paraclostridium(100);	Bacteria~Bacillota_A~Clostridia~Peptostreptococcales~Peptostreptococcaceae~Paraclostridium~Paraclostridium	94.286	0	0	0	0	0	0	0.0138	0
OTU_107	Bacteria(100);Deinococcota(100);Deinococci(100);Deinococcales(100);Trueperaceae(100);Truepera(100);	Bacteria~Deinococcota~Deinococci~Deinococcales~Trueperaceae~CSSed10-48~CSSed10-48	86	0.675	0.0042	0.0046	0.2252	0.0053	0.0071	0.6133	0.0057
OTU_1070	Bacteria(100);Desulfobacterota(97);Desulfuromonadia(97);Bradymonadales(96);Bradymonadaceae(96);Bradymonadaceae_ge(96);	Bacteria~Myxococcota~Bradymonadia~Bradymonadales~Bradymonadaceae~Lujinxingia~Lujinxingia	95.184	0.0492	0	0	0	0	0	0.0138	0
OTU_1077	Bacteria(100);Actinobacteriota(100);Acidimicrobiia(100);Microtrichales(96);Microtrichales(96);Microtrichales(96);	Bacteria~Actinomycetota~Acidimicrobiia~Acidimicrobiales~SKKL01~Actinomarinicola~Actinomarinicola	90.571	0.0179	0	0.0004	0	0	0	0	0
OTU_1079	Bacteria(100);Bacteroidota(100);Bacteroidia(100);Flavobacteriales(99);Crocinitomicaceae(99);Wandonia(82);	Bacteria~Bacteroidota~Bacteroidia~Flavobacteriales~Crocinitomicaceae~Brumimicrobium~Brumimicrobium	90	0	0	0.0007	0	0	0	0	0
OTU_108	Bacteria(100);Cyanobacteria(100);Cyanobacteriia(100);Cyanobacteriales(100);Phormidiaceae(100);Arthrospira_PCC-7345(100);	Bacteria~Cyanobacteriota~Cyanobacteriia~Cyanobacteriales~Microcoleaceae~Limnospira~Limnospira	84.348	0.3755	0.4993	0	0	0.0212	0	0	0
OTU_1082	Bacteria(100);Bacteroidota(100);Rhodothermia(100);Balneolales(100);Balneolaceae(100);ML310M-34(100);	Bacteria~Bacteroidota~Rhodothermia~Balneolales~Cyclonatronaceae~Cyclonatronum~Cyclonatronum	99.429	0	0	0.0021	0	0	0.0071	0	0
OTU_1086	Bacteria(100);Proteobacteria(100);Alphaproteobacteria(100);Alphaproteobacteria(100);Alphaproteobacteria(100);Alphaproteobacteria(100);	Bacteria~Pseudomonadota~Alphaproteobacteria~Kiloniellales~Rhodovibrionaceae~Limimonas~Limimonas	92.898	0	0	0.0011	0	0	0	0	0
OTU_109	Bacteria(100);Hydrogenedentes(100);Hydrogenedentia(100);Hydrogenedentiales(100);Hydrogenedensaceae(100);Hydrogenedensaceae_ge(95);	Bacteria~Hydrogenedentota~Hydrogenedentia~Hydrogenedentiales~SLHB01~JAACEL01~JAACEL01	86.932	0.0045	0.0042	0.0359	0	0.0159	0	0.0689	0
OTU_1092	Eukaryota(100);Eukaryota(100);Eukaryota(100);Eukaryota(100);Eukaryota(100);Eukaryota(100);	Bacteria~Bacteroidota~Rhodothermia~Balneolales~HLUCCA01~HLUCCA01~HLUCCA01	98.857	0	0	0.0018	0	0	0	0	0
OTU_1093	Bacteria(99);Bacteria(99);Bacteria(99);Bacteria(99);Bacteria(99);Bacteria(99);	Bacteria~Desulfobacterota~Syntrophia~Syntrophales~PHBD01~PHBD01~PHBD01	90.857	0.0045	0	0	0	0	0	0.0138	0
OTU_1095	Bacteria(98);Bacteria(98);Bacteria(98);Bacteria(98);Bacteria(98);Bacteria(98);	Bacteria~Verrucomicrobiota~Verrucomicrobiae~Verrucomicrobiales~Akkermansiaceae~Rubritalea~Rubritalea	97.429	0	0	0.0004	0	0	0.0196	0	0
OTU_1099	Eukaryota(91);Eukaryota(91);Eukaryota(91);Eukaryota(91);Eukaryota(91);Eukaryota(91);			0	0.0084	0	0	0	0	0	0
OTU_11	Bacteria(100);Bacteroidota(100);Bacteroidia(100);Cytophagales(100);Cyclobacteriaceae(100);Cecembia(100);	Bacteria~Bacteroidota~Bacteroidia~Cytophagales~Cyclobacteriaceae~Cecembia~Cecembia	95.714	0.6928	0	6.5576	1.3514	8.6876	0.1303	0.8752	0.5009
OTU_110	Bacteria(100);Bacteroidota(100);Bacteroidia(100);Cytophagales(100);Cyclobacteriaceae(100);Aquiflexum(100);	Bacteria~Bacteroidota~Bacteroidia~Cytophagales~Cyclobacteriaceae~Aquiflexum~Aquiflexum	99.714	0.0849	0.2224	0.0548	0	0	0	0.0138	0
OTU_1102	unknown;unknown(0);unknown(0);unknown(0);unknown(0);unknown(0);			0	0.0084	0	0	0	0	0	0
OTU_1103	Bacteria(100);Planctomycetota(100);Phycisphaerae(100);Phycisphaerales(100);Phycisphaeraceae(100);Urania-1B-19_marine_sediment_group(83);	Bacteria~Planctomycetota~Phycisphaerae~Phycisphaerales~SM1A02~JADFKZ01~JADFKZ01	98.857	0.0045	0	0	0	0	0	0.0276	0
OTU_1104	Eukaryota(85);Eukaryota(85);Eukaryota(85);Eukaryota(85);Eukaryota(85);Eukaryota(85);			0	0.0084	0	0	0	0	0	0
OTU_1105	Bacteria(100);Patescibacteria(100);Saccharimonadia(100);Saccharimonadales(100);Saccharimonadales_fa(82);Saccharimonadales_ge(82);	Bacteria~Patescibacteria~Saccharimonadia~Saccharimonadales~Nanogingivalaceae~Nanogingivalis~Nanogingivalis	93.714	0	0	0	0	0	0	0.0138	0
OTU_111	Bacteria(100);Planctomycetota(100);Planctomycetes(100);Pirellulales(100);Pirellulaceae(100);Roseimaritima(95);	Bacteria~Planctomycetota~Planctomycetia~Pirellulales~Pirellulaceae~Roseimaritima~Roseimaritima	99.714	0.1564	0	0	0	0	0	0.6753	0
OTU_1117	Bacteria(100);Proteobacteria(100);Alphaproteobacteria(100);Rhodobacterales(100);Rhodobacteraceae(100);Rhodobacteraceae(100);	Bacteria~Pseudomonadota~Alphaproteobacteria~Rhodobacterales~Rhodobacteraceae~Roseivivax~Roseivivax	94.286	0.219	0.021	0.0253	1.1261	0.2385	0.0179	0.8752	0.2132
OTU_112	Bacteria(100);Bacteroidota(100);Bacteroidia(100);SM1A07(99);SM1A07_fa(99);SM1A07_ge(99);	Bacteria~Bacteroidota~UBA10030~UBA10030~SZUA-254~JACOSY01~JACOSY01	90.341	0	0	0.0068	0	0.0106	0.1892	0	0
OTU_1122	Bacteria(100);Bacteroidota(100);Bacteroidia(100);Bacteroidales(100);Williamwhitmaniaceae(100);Blvii28_wastewater-sludge_group(100);	Bacteria~Bacteroidota~Bacteroidia~Bacteroidales~Tenuifilaceae~Perlabentimonas~Perlabentimonas	99.429	0.0045	0	0	0	0	0	0.0069	0
OTU_1126	unknown;unknown(0);unknown(0);unknown(0);unknown(0);unknown(0);			0	0	0	0	0.0053	0.0018	0	0
OTU_1128	Bacteria(100);Actinobacteriota(100);Actinobacteria(100);Micrococcales(100);Demequinaceae(100);Demequina(100);	Bacteria~Actinomycetota~Actinomycetia~Actinomycetales~Demequinaceae~Demequina~Demequina	99.714	0.0045	0	0	0	0	0	0.0138	0
OTU_1129	Bacteria(100);Spirochaetota(100);MVP-15(100);MVP-15_or(100);MVP-15_fa(100);MVP-15_ge(100);	Bacteria~Riflebacteria~Ozemobacteria~Ozemobacterales~Ozemobacteraceae~Rifleibacterium~Rifleibacterium	98.571	0.0179	0	0	0	0	0	0	0
OTU_113	Bacteria(100);Proteobacteria(100);Gammaproteobacteria(100);Xanthomonadales(100);Xanthomonadaceae(99);uncultured(90);	Bacteria~Pseudomonadota~Gammaproteobacteria~Xanthomonadales~Xanthomonadaceae~VRTS01~VRTS01	97.135	0.4515	0.0042	0	0	0	0	0.7994	0.0011
OTU_1132	Bacteria(100);Firmicutes(100);Bacilli(100);Bacillales(100);Salisediminibacteriaceae(99);Salipaludibacillus(93);	Bacteria~Bacillota~Bacilli~Bacillales_H~Salisediminibacteriaceae~Salipaludibacillus~Salipaludibacillus	97.714	0.1207	0	0	0	0	0	0.0138	0.0023
OTU_1134	Bacteria(100);Bacteroidota(100);Bacteroidia(100);Bacteroidales(99);ML635J-40_aquatic_group(99);ML635J-40_aquatic_group_ge(99);	Bacteria~Bacteroidota~Bacteroidia~Bacteroidales~UBA7960~SKVR01~SKVR01	96.571	0.0045	0	0	0	0	0	0.0138	0
OTU_114	Bacteria(100);Firmicutes(100);Bacilli(100);Bacillales(100);Planococcaceae(100);Planomicrobium(84);	Bacteria~Bacillota~Bacilli~Bacillales~Planococcaceae~Planococcus~Planococcus	97.429	0.523	0	0	0	0	0	0.0069	0
OTU_1141	Bacteria(100);Myxococcota(89);Polyangia(89);Polyangiales(80);Polyangiales(80);Polyangiales(80);	Bacteria~Myxococcota~Polyangia~Polyangiales~SG8-38~JACKEH01~JACKEH01	99.714	0.0134	0	0	0	0	0	0	0
OTU_1142	Bacteria(100);Proteobacteria(100);Gammaproteobacteria(100);Gammaproteobacteria(100);Gammaproteobacteria(100);Gammaproteobacteria(100);	Bacteria~Pseudomonadota~Gammaproteobacteria~Pseudomonadales~Pseudomonadaceae~Halopseudomonas~Halopseudomonas	98	0.0179	0	0	0	0	0	0	0
OTU_1143	Bacteria(100);Chloroflexi(98);Anaerolineae(98);RBG-13-54-9(98);RBG-13-54-9_fa(98);RBG-13-54-9_ge(98);	Bacteria~Chloroflexota~Anaerolineae~UBA7937~B3-Chlor~B3-Chlor~B3-Chlor	94.286	0.0045	0	0	0.2252	0	0	0.0069	0
OTU_1144	Bacteria(100);Planctomycetota(97);Phycisphaerae(96);Phycisphaerales(90);AKAU3564_sediment_group(90);AKAU3564_sediment_group_ge(90);	Bacteria~Planctomycetota~Phycisphaerae~SM23-33~SM23-33~JALHTV01~JALHTV01	90.741	0.0089	0	0	0	0	0	0	0
OTU_1147	Bacteria(100);Proteobacteria(100);Alphaproteobacteria(100);Rhodobacterales(100);Rhodobacteraceae(100);Amaricoccus(83);	Bacteria~Pseudomonadota~Alphaproteobacteria~Rhodobacterales~Rhodobacteraceae~Amaricoccus~Amaricoccus	92.308	0.0223	0	0	0	0	0	0	0
OTU_115	Bacteria(100);Proteobacteria(100);Gammaproteobacteria(100);Xanthomonadales(100);Rhodanobacteraceae(99);Aquimonas(98);	Bacteria~Pseudomonadota~Gammaproteobacteria~Xanthomonadales~Xanthomonadaceae~Aquimonas~Aquimonas	90.286	0	0.4573	0	0	0	0	0	0
OTU_1150	Bacteria(100);Bacteroidota(100);Bacteroidia(100);Bacteroidales(83);ML635J-40_aquatic_group(83);ML635J-40_aquatic_group_ge(83);	Bacteria~Chloroflexota~Chloroflexia~Chloroflexales~Chloroflexaceae~Chloroploca~Chloroploca	84.81	0.0179	0	0	0	0	0	0	0
OTU_1154	Bacteria(100);Firmicutes(100);Clostridia(100);Clostridia_or(100);Hungateiclostridiaceae(100);UCG-012(99);	Bacteria~Bacillota_A~Clostridia~Saccharofermentanales~Saccharofermentanaceae~Saccharofermentans~Saccharofermentans	95.989	0.0089	0	0	0	0	0	0.0069	0
OTU_1157	Bacteria(100);Firmicutes(100);Clostridia(100);Peptostreptococcales-Tissierellales(100);Peptostreptococcales-Tissierellales_fa(100);Gottschalkia(100);	Bacteria~Bacillota_A~Clostridia~Tissierellales~Gottschalkiaceae~Andreesenia~Andreesenia	95.442	0.0223	0	0	0	0	0	0	0
OTU_1159	Bacteria(100);Proteobacteria(100);Gammaproteobacteria(100);Oceanospirillales(97);Saccharospirillaceae(88);Saccharospirillaceae(88);	Bacteria~Pseudomonadota~Gammaproteobacteria~Pseudomonadales~Natronospirillaceae~Natronospirillum~Natronospirillum	92.571	0.0045	0	0	0.6757	0	0	0.0138	0
OTU_116	Bacteria(100);Firmicutes(100);Bacilli(100);Bacillales(100);Bacillaceae(100);Bacillaceae(100);	Bacteria~Bacillota~Bacilli~Bacillales_D~Amphibacillaceae~Virgibacillus_E~Virgibacillus_E	99.143	0.3308	0	0	0	0	0	0.1309	0
OTU_1161	Bacteria(100);Proteobacteria(100);Alphaproteobacteria(100);Rhodobacterales(100);Rhodobacteraceae(100);Rhodobacteraceae(100);	Bacteria~Pseudomonadota~Alphaproteobacteria~Rhodobacterales~Rhodobacteraceae~Paracoccus~Paracoccus	99.429	0.0045	0	0.0021	0	0.0159	0	0.0069	0
OTU_1162	Bacteria(100);Firmicutes(100);Clostridia(100);Peptostreptococcales-Tissierellales(100);Fusibacteraceae(100);Fusibacter(100);	Bacteria~Bacillota_A~Clostridia~Peptostreptococcales~Acidaminobacteraceae~Fusibacter_A~Fusibacter_A	96.571	0.0089	0	0	0	0	0	0.0207	0
OTU_1165	Bacteria(100);Actinobacteriota(92);Actinobacteria(91);Actinobacteria(91);Actinobacteria(91);Actinobacteria(91);	Bacteria~Actinomycetota~Actinomycetia~Euzebyales~Egibacteraceae~WHTC01~WHTC01	95.143	0	0	0	0.2252	0	0	0.0276	0
OTU_1166	Bacteria(100);Planctomycetota(100);Phycisphaerae(100);Phycisphaerales(100);Phycisphaeraceae(100);uncultured(99);	Bacteria~Planctomycetota~Phycisphaerae~Phycisphaerales~Zrk34~RI-212~RI-212	97.143	0	0	0	0	0	0	0.0207	0
OTU_1167	Eukaryota(100);Eukaryota(100);Eukaryota(100);Eukaryota(100);Eukaryota(100);Eukaryota(100);	Bacteria~Spirochaetota~Leptospirae~Leptospirales~Leptospiraceae~UBA2033~UBA2033	90.881	0	0	0	0	0	0	0.0138	0
OTU_1168	Bacteria(99);Planctomycetota(99);Phycisphaerae(99);Phycisphaerales(99);Phycisphaeraceae(99);SM1A02(82);	Bacteria~Planctomycetota~Phycisphaerae~Phycisphaerales~UBA1924~JACVCK01~JACVCK01	91.691	0	0	0	0	0	0	0.0207	0
OTU_1169	Bacteria(100);Actinobacteriota(100);Acidimicrobiia(100);Microtrichales(99);Microtrichales(99);Microtrichales(99);	Bacteria~Actinomycetota~Acidimicrobiia~Acidimicrobiales~SKKL01~Actinomarinicola~Actinomarinicola	96.857	0.0134	0	0.0014	0	0	0	0.0069	0
OTU_117	Bacteria(96);Bacteria(96);Bacteria(96);Bacteria(96);Bacteria(96);Bacteria(96);	Bacteria~Bacillota_A~Clostridia~Oscillospirales~Oscillospiraceae~Lawsonibacter~Lawsonibacter	94.857	0	0	0.0263	0	0	0	0	0
OTU_1173	Bacteria(100);Bacteroidota(100);Rhodothermia(100);Balneolales(100);Balneolaceae(100);uncultured(90);	Bacteria~Bacteroidota~Rhodothermia~Balneolales~Balneolaceae~SW132~SW132	97.714	0	0	0	0	0	0	0.0138	0
OTU_1178	unknown;unknown(0);unknown(0);unknown(0);unknown(0);unknown(0);			0	0	0	0	0	0.0036	0	0
OTU_118	Bacteria(100);Firmicutes(100);Bacilli(100);Lactobacillales(100);Carnobacteriaceae(100);Alkalibacterium(100);	Bacteria~Bacillota~Bacilli~Lactobacillales~Carnobacteriaceae~Alkalibacterium~Alkalibacterium	96.857	0.4291	0	0	0	0.0053	0	0.0276	0
OTU_1182	unknown;unknown(0);unknown(0);unknown(0);unknown(0);unknown(0);			0	0	0	0	0	0.0036	0	0
OTU_1188	Bacteria(100);Bacteroidota(100);Bacteroidia(100);Flavobacteriales(99);Cryomorphaceae(98);Cryomorphaceae(98);	Bacteria~Bacteroidota~Bacteroidia~Flavobacteriales~Schleiferiaceae~Owenweeksia~Owenweeksia	96	0	0.0042	0.0011	0	0	0	0	0
OTU_1189	Bacteria(100);Planctomycetota(100);Planctomycetes(100);Pirellulales(100);Pirellulaceae(100);Blastopirellula(100);	Bacteria~Planctomycetota~Planctomycetia~Pirellulales~Pirellulaceae~Mariniblastus~Mariniblastus	94.017	0	0	0.0007	0	0	0	0	0
OTU_1195	unknown;unknown(0);unknown(0);unknown(0);unknown(0);unknown(0);			0	0	0.0014	0	0	0	0	0
OTU_1197	unknown;unknown(0);unknown(0);unknown(0);unknown(0);unknown(0);			0	0.0042	0.0004	0	0	0	0	0
OTU_12	Bacteria(100);Chloroflexi(97);Anaerolineae(97);SBR1031(96);A4b(96);A4b_ge(96);	Bacteria~Chloroflexota~Anaerolineae~Aggregatilineales~Phototrophicaceae~Phototrophicus~Phototrophicus	99.429	0	0.0084	2.427	0	0.1961	0.0928	0.0276	0.0963
OTU_120	Bacteria(100);Cyanobacteria(100);Cyanobacteriia(100);Cyanobacteriales(100);Cyanobacteriaceae(100);Cyanobacterium_PCC-7202(100);	Bacteria~Cyanobacteriota~Cyanobacteriia~Cyanobacteriales~Cyanobacteriaceae~Cyanobacterium~Cyanobacterium	95.989	0	0	0.1632	0	0	0	0	0
OTU_1201	Bacteria(100);Proteobacteria(100);Alphaproteobacteria(100);Rhizobiales(100);Rhizobiaceae(100);Rhizobiaceae(100);	Bacteria~Pseudomonadota~Alphaproteobacteria~Rhizobiales~Rhizobiaceae~Chelativorans_A~Chelativorans_A	97.429	0	0	0.0025	0	0	0	0	0
OTU_121	unknown;unknown(0);unknown(0);unknown(0);unknown(0);unknown(0);	Bacteria~Chloroflexota~Anaerolineae~Anaerolineales~UBA11657~BD1~BD1	98.857	0	0	0	0	0	0.0643	0	0.0699
OTU_122	Bacteria(100);Proteobacteria(100);Gammaproteobacteria(100);Oceanospirillales(100);Halomonadaceae(100);Halomonas(99);	Bacteria~Pseudomonadota~Gammaproteobacteria~Pseudomonadales~Halomonadaceae~Halomonas~Halomonas	88.418	0.4559	0.1594	0.0014	0	0	0	0.0551	0
OTU_123	Bacteria(100);Bacteroidota(100);Rhodothermia(100);Balneolales(100);Balneolaceae(100);Balneolaceae(100);	Bacteria~Bacteroidota~Rhodothermia~Balneolales~Natronogracilivirgulaceae~Natronogracilivirgula~Natronogracilivirgula	80.625	0.1296	0	0	0	0	0	0.758	0
OTU_1232	Bacteria(100);Bacteroidota(100);Rhodothermia(100);Balneolales(100);Balneolaceae(100);ML310M-34(100);	Bacteria~Bacteroidota~Rhodothermia~Balneolales~Natronogracilivirgulaceae~Natronogracilivirgula~Natronogracilivirgula	99.714	0	0.0042	0.0021	0	0	0	0	0
OTU_1236	Bacteria(100);Proteobacteria(100);Gammaproteobacteria(100);Nitrosococcales(100);Methylophagaceae(100);Methylophaga(100);	Bacteria~Pseudomonadota~Gammaproteobacteria~Nitrosococcales~Methylophagaceae~Methylophaga~Methylophaga	89.062	0	0	0.0025	0	0	0	0	0
OTU_1245	Bacteria(100);Bacteroidota(100);Bacteroidia(100);Flavobacteriales(100);Flavobacteriaceae(100);Flavobacterium(93);	Bacteria~Bacteroidota~Bacteroidia~Flavobacteriales~Flavobacteriaceae~Flavobacterium~Flavobacterium	97.143	0.0358	0	0	0	0	0	0	0
OTU_1247	Bacteria(100);Planctomycetota(90);Phycisphaerae(87);Phycisphaerae(87);Phycisphaerae(87);Phycisphaerae(87);	Bacteria~Planctomycetota~Phycisphaerae~Sedimentisphaerales~Anaerohalosphaeraceae~Anaerohalosphaera~Anaerohalosphaera	96.011	0	0	0	0.4505	0	0	0	0
OTU_1248	Bacteria(100);Bacteroidota(100);Ignavibacteria(100);Ignavibacteriales(100);BSN166(100);BSN166_ge(100);	Bacteria~Bacteroidota~Kryptonia~Kryptoniales~Kryptoniaceae~Kryptonium~Kryptonium	98.286	0.0223	0	0	0	0	0	0	0
OTU_125	Bacteria(100);Bacteroidota(100);Bacteroidia(100);Bacteroidales(99);ML635J-40_aquatic_group(98);ML635J-40_aquatic_group_ge(98);	Bacteria~Bacteroidota~Bacteroidia~Bacteroidales~UBA7960~SKVR01~SKVR01	99.429	0.0939	0	0	1.8018	0	0	0.379	0
OTU_1251	Bacteria(100);Proteobacteria(100);Gammaproteobacteria(100);Enterobacterales(100);Enterobacteriaceae(100);Escherichia-Shigella(97);	Bacteria~Actinomycetota~Actinomycetia~Streptomycetales~Streptomycetaceae~Streptomyces~Streptomyces	99.429	0	0	0.0007	0	0	0	0	0
OTU_1252	Bacteria(100);Proteobacteria(100);Gammaproteobacteria(100);Legionellales(100);Legionellaceae(100);Legionella(95);	Bacteria~Pseudomonadota~Gammaproteobacteria~Legionellales~Legionellaceae~JAFIFT01~JAFIFT01	99.429	0	0	0.0075	0	0	0	0	0
OTU_1254	Bacteria(99);Patescibacteria(99);Gracilibacteria(99);JGI_0000069-P22(99);JGI_0000069-P22_fa(99);JGI_0000069-P22_ge(99);	Bacteria~Patescibacteria~JAEDAM01~BD1-5~UBA6164~JAACSU01~JAACSU01	92	0.0089	0	0	0	0	0	0	0
OTU_1255	Bacteria(100);Firmicutes(100);Clostridia(100);Clostridia_or(100);Hungateiclostridiaceae(100);uncultured(80);	Bacteria~Bacillota_A~Clostridia~Saccharofermentanales~Saccharofermentanaceae~Saccharofermentans~Saccharofermentans	94.571	0.0179	0	0	0	0	0	0.0138	0
OTU_1269	Bacteria(100);Proteobacteria(100);Alphaproteobacteria(100);Rhizobiales(100);Beijerinckiaceae(100);Salinarimonas(98);	Bacteria~Pseudomonadota~Alphaproteobacteria~Rhizobiales~Beijerinckiaceae~Saliniramus~Saliniramus	98.857	0	0	0.0007	0	0	0	0	0
OTU_127	Bacteria(100);Proteobacteria(100);Gammaproteobacteria(100);Salinisphaerales(100);Algiphilaceae(100);Algiphilus(100);	Bacteria~Pseudomonadota~Gammaproteobacteria~Nevskiales~Algiphilaceae~Algiphilus~Algiphilus	85.079	0.0045	0.1636	0.0046	0	0.0265	0.0303	0	0
OTU_1270	Bacteria(100);Planctomycetota(100);Planctomycetes(100);Pirellulales(100);Pirellulaceae(100);Pirellulaceae(100);	Bacteria~Planctomycetota~Planctomycetia~Pirellulales~Pirellulaceae~SKKK01~SKKK01	98.286	0.0358	0	0	0	0	0	0	0
OTU_1271	Eukaryota(82);Eukaryota(82);Eukaryota(82);Eukaryota(82);Eukaryota(82);Eukaryota(82);			0	0	0.0007	0	0	0	0	0
OTU_1278	Bacteria(100);Firmicutes(100);Desulfotomaculia(100);Desulfotomaculales(100);Desulfotomaculales_fa(100);Desulfohalotomaculum(100);	Bacteria~Bacillota_B~Desulfotomaculia~Desulfotomaculales~Desulfohalotomaculaceae~Desulfofalx~Desulfofalx	99.714	0	0	0.0007	0	0	0	0	0
OTU_128	Bacteria(100);Bacteroidota(100);Bacteroidia(100);Cytophagales(100);Cyclobacteriaceae(100);Cyclobacteriaceae(100);	Bacteria~Bacteroidota~Bacteroidia~Cytophagales~Cyclobacteriaceae~Echinicola~Echinicola	98.286	0.3352	0.0042	0	0	0	0	0.124	0
OTU_1286	Bacteria(100);Verrucomicrobiota(100);Verrucomicrobiae(100);Verrucomicrobiales(100);Rubritaleaceae(100);Luteolibacter(98);	Bacteria~Verrucomicrobiota~Verrucomicrobiae~Verrucomicrobiales~Akkermansiaceae~Haloferula~Haloferula	97.143	0	0	0	0	0.0477	0	0.0069	0
OTU_129	Bacteria(100);Bacteroidota(100);Bacteroidia(100);Flavobacteriales(100);Flavobacteriaceae(100);Flavobacterium(100);	Bacteria~Bacteroidota~Bacteroidia~Flavobacteriales~Flavobacteriaceae~Flavobacterium~Flavobacterium	82.154	0	0.3063	0	0	0	0	0.0207	0
OTU_1290	Bacteria(100);Verrucomicrobiota(100);Verrucomicrobiae(100);Pedosphaerales(100);Pedosphaeraceae(100);Pedosphaeraceae(100);	Bacteria~Verrucomicrobiota~Verrucomicrobiae~Pedosphaerales~Pedosphaeraceae~Pedosphaera~Pedosphaera	98.857	0.0313	0	0	0	0	0	0.0069	0
OTU_1298	Bacteria(100);Proteobacteria(100);Gammaproteobacteria(100);Gammaproteobacteria(100);Gammaproteobacteria(100);Gammaproteobacteria(100);	Bacteria~Pseudomonadota~Gammaproteobacteria~Pseudomonadales~Spongiibacteraceae~Litorivivens~Litorivivens	98.571	0	0	0.0007	0	0	0	0	0
OTU_1299	Bacteria(100);Proteobacteria(100);Alphaproteobacteria(100);Thalassobaculales(97);uncultured(97);uncultured_ge(97);	Bacteria~Pseudomonadota~Gammaproteobacteria~Arenicellales~CAJQKF01~BQJD01~BQJD01	97.826	0.0089	0	0	0	0	0	0	0
OTU_13	Bacteria(100);Cyanobacteria(100);Cyanobacteriia(100);Cyanobacteriales(100);Paraspirulinaceae(100);Spirulina_PCC-6313(100);	Bacteria~Cyanobacteriota~Cyanobacteriia~Cyanobacteriales~Spirulinaceae~Spirulina~Spirulina	99.429	1.6181	21.7723	0	0	0.0159	0.0018	0	0
OTU_130	Bacteria(100);Verrucomicrobiota(100);Verrucomicrobiae(100);Opitutales(100);Puniceicoccaceae(100);Puniceicoccaceae(100);	Bacteria~Verrucomicrobiota~Verrucomicrobiae~Opitutales~Opitutaceae~Synoicihabitans~Synoicihabitans	92.023	0.0045	0.1007	0.0011	0	0	0	0.0138	0.0608
OTU_1301	Bacteria(100);Desulfobacterota(100);Desulfuromonadia(100);Desulfuromonadia_or(100);Desulfuromonadia_or(100);Desulfuromonadia_or(100);	Bacteria~Desulfobacterota_F~Desulfuromonadia~Desulfuromonadales~WTL~Deferrimonas~Deferrimonas	98.854	0.0268	0	0	0	0.0053	0	0	0
OTU_1306	Eukaryota(80);Eukaryota(80);Eukaryota(80);Eukaryota(80);Eukaryota(80);Eukaryota(80);			0.0089	0	0	0	0	0	0	0
OTU_1310	Bacteria(100);Bacteria(100);Bacteria(100);Bacteria(100);Bacteria(100);Bacteria(100);	Bacteria~Verrucomicrobiota~Kiritimatiellia~SLAD01~WLWN01~WLWN01~WLWN01	95.143	0	0.0629	0	0	0.0106	0	0	0
OTU_1311	Bacteria(100);Bacteroidota(100);Bacteroidia(100);Cytophagales(100);Amoebophilaceae(100);Candidatus_Amoebophilus(100);	Bacteria~Bacteroidota~Bacteroidia~Cytophagales~Amoebophilaceae~Amoebophilus~Amoebophilus	95.894	0	0	0	0	0	0	0.0207	0.0034
OTU_1315	Bacteria(100);Actinobacteriota(100);Acidimicrobiia(100);Actinomarinales(100);uncultured(99);uncultured_ge(99);	Bacteria~Actinomycetota~Acidimicrobiia~UBA5794~UBA11373~UBA11373~UBA11373	98.286	0.0179	0	0	0	0	0	0	0
OTU_132	Bacteria(100);Planctomycetota(100);Planctomycetes(100);Pirellulales(100);Pirellulaceae(100);Pirellulaceae(100);	Bacteria~Planctomycetota~Planctomycetia~Pirellulales~Pirellulaceae~SKKK01~SKKK01	93.466	0.2593	0	0	0	0	0	0.4204	0
OTU_1324	Bacteria(100);Actinobacteriota(100);Actinobacteria(100);Nitriliruptorales(100);Nitriliruptoraceae(100);Nitriliruptoraceae_ge(100);	Bacteria~Actinomycetota~Actinomycetia~Nitriliruptorales~Nitriliruptoraceae~Egicoccus~Egicoccus	97.429	0.0089	0	0	0	0	0	0	0
OTU_1325	unknown;unknown(0);unknown(0);unknown(0);unknown(0);unknown(0);			0.0134	0	0	0	0	0	0	0
OTU_1332	Bacteria(100);Chloroflexi(100);Dehalococcoidia(100);GIF9(100);AB-539-J10(100);AB-539-J10_ge(100);	Bacteria~Chloroflexota~Dehalococcoidia~GIF9~AB-539-J10~SKVJ01~SKVJ01	96.857	0.0089	0	0	0	0	0	0.0069	0
OTU_1335	Bacteria(100);Bacteroidota(100);Bacteroidia(100);Sphingobacteriales(86);Sphingobacteriales(86);Sphingobacteriales(86);	Bacteria~Bacteroidota~Bacteroidia~Bacteroidales~JAAYJT01~JAAYJT01~JAAYJT01	96.286	0.0179	0	0	0	0	0	0	0
OTU_134	Bacteria(100);Bacteroidota(100);Rhodothermia(100);Balneolales(100);Balneolaceae(100);Balneolaceae(100);	Bacteria~Bacteroidota~Rhodothermia~Balneolales~Balneolaceae~Rhodohalobacter~Rhodohalobacter	92.571	0.0849	0	0.0018	2.7027	0	0	0.5927	0
OTU_1342	Bacteria(100);Firmicutes(100);Clostridia(100);Clostridia_or(100);Hungateiclostridiaceae(100);Hungateiclostridiaceae(100);	Bacteria~Bacillota_A~Clostridia~Saccharofermentanales~Saccharofermentanaceae~Saccharofermentans~Saccharofermentans	78.899	0.0223	0	0	0	0	0	0	0
OTU_1347	Bacteria(100);Proteobacteria(100);Alphaproteobacteria(100);Rhodobacterales(100);Rhodobacteraceae(100);Rhodobacteraceae(100);	Bacteria~Pseudomonadota~Alphaproteobacteria~Rhodobacterales~Rhodobacteraceae~Paracoccus~Paracoccus	97.143	0.0089	0.0084	0.0021	0	0.0212	0.0036	0.0069	0.0023
OTU_135	Bacteria(100);Bacteroidota(100);Bacteroidia(100);Flavobacteriales(100);Cryomorphaceae(100);Cryomorpha(100);	Bacteria~Bacteroidota~Bacteroidia~Flavobacteriales~Cryomorphaceae~Cryomorpha~Cryomorpha	96.866	0.2011	0.0042	0	0	0	0	0.2343	0
OTU_136	Bacteria(100);Spirochaetota(100);Leptospirae(100);Leptospirales(100);Leptospiraceae(100);Leptospira(100);	Bacteria~Spirochaetota~Leptospirae~Leptospirales~Leptospiraceae~Leptospira_B~Leptospira_B	96.571	0	0.0462	0.01	0	0	0.1018	0.0069	0
OTU_1362	Bacteria(100);Proteobacteria(100);Alphaproteobacteria(100);Micavibrionales(99);Micavibrionaceae(90);uncultured(89);	Bacteria~Pseudomonadota~Alphaproteobacteria~Micavibrionales~Micavibrionaceae~UBA2705~UBA2705	98.857	0.0045	0	0	0	0	0	0.0069	0
OTU_1365	Bacteria(100);Actinobacteriota(100);Acidimicrobiia(100);Microtrichales(100);uncultured(100);uncultured_ge(100);	Bacteria~Actinomycetota~Acidimicrobiia~Acidimicrobiales~SKKL01~Actinomarinicola~Actinomarinicola	83.239	0.0358	0	0	0	0	0	0	0
OTU_137	Bacteria(99);Cyanobacteria(92);Cyanobacteriia(92);Chloroplast(91);Chloroplast_fa(91);Chloroplast_ge(91);	Bacteria~Cyanobacteriota~Cyanobacteriia~Cyanobacteriales~Coleofasciculaceae~Caldora~Caldora	99.712	0.0134	0	0	0	0.0318	0.0928	0	0.0046
OTU_1371	Bacteria(100);Actinobacteriota(100);Actinobacteria(100);Euzebyales(100);Euzebyaceae(100);uncultured(99);	Bacteria~Actinomycetota~Actinomycetia~Euzebyales~Egibacteraceae~WHTC01~WHTC01	99.143	0.0179	0	0	0	0	0	0	0
OTU_1373	Bacteria(100);Planctomycetota(100);Planctomycetes(100);Pirellulales(100);Pirellulaceae(100);Pir4_lineage(98);	Bacteria~Planctomycetota~Planctomycetia~Pirellulales~Lacipirellulaceae~Botrimarina~Botrimarina	88.506	0.0358	0	0	0.2252	0	0	0.0069	0
OTU_1379	Bacteria(100);Firmicutes(84);Firmicutes(84);Firmicutes(84);Firmicutes(84);Firmicutes(84);	Bacteria~Bacillota_B~Moorellia~Moorellales~Moorellaceae~Moorella~Moorella	95.714	0.0134	0	0	0	0	0	0	0
OTU_1386	Bacteria(100);Proteobacteria(100);Gammaproteobacteria(100);Burkholderiales(100);Comamonadaceae(100);Hydrogenophaga(95);	Bacteria~Pseudomonadota~Gammaproteobacteria~Burkholderiales~Burkholderiaceae_B~Tepidicella~Tepidicella	96.286	0.0223	0	0	0	0	0	0.0069	0
OTU_139	Bacteria(100);Proteobacteria(100);Alphaproteobacteria(100);Rhodobacterales(100);Rhodobacteraceae(100);Rhodobacteraceae(100);	Bacteria~Pseudomonadota~Alphaproteobacteria~Rhodobacterales~Rhodobacteraceae~Mesobacterium~Mesobacterium	88.636	0.2637	0.0084	0.0007	0	0.0053	0.0018	0	0.0011
OTU_14	Bacteria(100);Proteobacteria(100);Gammaproteobacteria(100);Legionellales(100);Legionellaceae(100);Legionella(99);	Bacteria~Pseudomonadota~Gammaproteobacteria~Legionellales~Legionellaceae~JAFIFT01~JAFIFT01	97.714	0.0045	0.0294	1.3888	0	0.2597	0.025	0	0
OTU_140	Bacteria(100);Bacteroidota(100);Rhodothermia(100);Balneolales(100);Balneolaceae(100);Rhodohalobacter(84);	Bacteria~Bacteroidota~Rhodothermia~Balneolales~Balneolaceae~Rhodohalobacter~Rhodohalobacter	98.286	0.0223	0	0	0	0	0	0.5168	0
OTU_1405	Bacteria(100);Verrucomicrobiota(100);Kiritimatiellae(100);Kiritimatiellales(100);Kiritimatiellaceae(100);MSBL3(100);	Bacteria~Verrucomicrobiota~Kiritimatiellia~Kiritimatiellales~Tichowtungiaceae~Tichowtungia~Tichowtungia	98.286	0.0134	0	0	0	0	0	0	0
OTU_141	Bacteria(100);Proteobacteria(100);Alphaproteobacteria(100);Rhodobacterales(100);Rhodobacteraceae(100);Rhodobacteraceae(100);	Bacteria~Pseudomonadota~Alphaproteobacteria~Rhodobacterales~Rhodobacteraceae~Wenxinia~Wenxinia	99.143	0.1207	0	0	0.2252	0	0	0.3859	0
OTU_1410	Bacteria(100);Bacteroidota(100);Bacteroidia(100);Bacteroidia(100);Bacteroidia(100);Bacteroidia(100);	Bacteria~Bacteroidota~Bacteroidia~Flavobacteriales~UA16~RI-182~RI-182	99.424	0.0179	0	0	0	0	0	0	0
OTU_1412	Bacteria(100);Firmicutes(100);Bacilli(100);RF39(100);RF39_fa(100);RF39_ge(100);	Bacteria~Bacillota~Bacilli~RF39~UBA660~CAJLIR01~CAJLIR01	98.857	0.0402	0	0	0	0	0	0	0
OTU_1418	Bacteria(100);Bacteroidota(98);Bacteroidia(98);Bacteroidia(98);Bacteroidia(98);Bacteroidia(98);	Bacteria~Bacteroidota~Bacteroidia~Flavobacteriales~Flavobacteriaceae~Capnocytophaga~Capnocytophaga	89.518	0	0.0168	0	0	0	0	0	0
OTU_1419	Bacteria(100);Actinobacteriota(100);Acidimicrobiia(100);IMCC26256(100);IMCC26256_fa(100);IMCC26256_ge(100);	Bacteria~Actinomycetota~Acidimicrobiia~IMCC26256~PALSA-555~SHVJ01~SHVJ01	94.571	0.0089	0	0	0	0	0	0	0
OTU_142	Bacteria(100);Proteobacteria(100);Alphaproteobacteria(100);Rhodobacterales(100);Rhodobacteraceae(100);Rhodobacteraceae(100);	Bacteria~Pseudomonadota~Alphaproteobacteria~Rhodobacterales~Rhodobacteraceae~Albidovulum~Albidovulum	82.432	0.0179	0.1343	0.1174	0	0.0265	0.5374	0.0207	0
OTU_1420	Bacteria(100);Proteobacteria(100);Gammaproteobacteria(100);Alteromonadales(100);Idiomarinaceae(100);Aliidiomarina(100);	Bacteria~Pseudomonadota~Gammaproteobacteria~Enterobacterales_A~Alteromonadaceae~Aliidiomarina~Aliidiomarina	80.243	0	0.0042	0.0007	0	0.0106	0	0	0
OTU_1421	Bacteria(100);Planctomycetota(100);Planctomycetes(100);Pirellulales(100);Pirellulaceae(100);Pirellulaceae(100);	Bacteria~Planctomycetota~Planctomycetia~Pirellulales~Thermoguttaceae~JAHIKV01~JAHIKV01	96.857	0.0134	0	0	0	0	0	0	0
OTU_1426	Eukaryota(85);Eukaryota(85);Eukaryota(85);Eukaryota(85);Eukaryota(85);Eukaryota(85);			0	0.0084	0	0	0	0	0	0
OTU_1427	Bacteria(100);Proteobacteria(100);Gammaproteobacteria(100);Alteromonadales(100);Marinobacteraceae(100);Marinobacter(100);	Bacteria~Pseudomonadota~Gammaproteobacteria~Pseudomonadales~Oleiphilaceae~Marinobacter~Marinobacter	98.571	0.0045	0.0462	0	0	0	0	0	0
OTU_143	Bacteria(97);Proteobacteria(94);Proteobacteria(94);Proteobacteria(94);Proteobacteria(94);Proteobacteria(94);	Bacteria~Pseudomonadota~Alphaproteobacteria~Sphingomonadales~Kordiimonadaceae~Kordiimonas~Kordiimonas	99.714	0	0	0	0	0.0053	0.1303	0	0
OTU_1433	Bacteria(100);Hydrogenedentes(100);Hydrogenedentia(100);Hydrogenedentiales(100);Hydrogenedensaceae(100);Hydrogenedensaceae_ge(99);	Bacteria~Hydrogenedentota~Hydrogenedentia~Hydrogenedentiales~SLHB01~JAIBAQ01~JAIBAQ01	98.857	0	0	0	0	0	0	0.0138	0
OTU_1434	Bacteria(100);Spirochaetota(100);Spirochaetia(100);Spirochaetales(100);Spirochaetaceae(100);Spirochaeta_2(80);	Bacteria~Spirochaetota~Spirochaetia~DSM-27196~SKKC01~SKKC01~SKKC01	90.769	0.0045	0	0	0.2252	0	0	0.0138	0.0034
OTU_1435	Bacteria(100);Cyanobacteria(100);Cyanobacteriia(100);Chloroplast(100);Chloroplast_fa(100);Chloroplast_ge(100);	Bacteria~Bacteroidota~Bacteroidia~Sphingobacteriales~Sphingobacteriaceae~Pedobacter~Pedobacter	96.581	0	0	0	0	0	0	0.0207	0
OTU_1436	Bacteria(100);Proteobacteria(100);Gammaproteobacteria(100);Gammaproteobacteria_Incertae_Sedis(92);Unknown_Family(92);Candidatus_Berkiella(92);	Bacteria~Pseudomonadota~Gammaproteobacteria~Berkiellales~Berkiellaceae~Berkiella~Berkiella	92.286	0	0	0	0	0	0	0.0276	0
OTU_1437	unknown;unknown(0);unknown(0);unknown(0);unknown(0);unknown(0);			0	0	0	0	0	0.0036	0	0
OTU_1439	Bacteria(100);Proteobacteria(100);Gammaproteobacteria(100);Ectothiorhodospirales(100);Ectothiorhodospiraceae(100);Thioalkalivibrio(100);	Bacteria~Pseudomonadota~Gammaproteobacteria~Ectothiorhodospirales~Ectothiorhodospiraceae~Thioalkalivibrio_A~Thioalkalivibrio_A	98	0	0	0	0	0	0	0.0758	0
OTU_144	Bacteria(100);Actinobacteriota(100);Acidimicrobiia(100);Microtrichales(100);Iamiaceae(100);Iamia(100);	Bacteria~Actinomycetota~Acidimicrobiia~Acidimicrobiales~JAAYBP01~Aquihabitans~Aquihabitans	98	0.0045	0	0.0221	0	0	0	0.0069	0
OTU_1441	Bacteria(100);Desulfobacterota(100);Desulfuromonadia(100);Bradymonadales(100);Bradymonadaceae(100);Bradymonadaceae_ge(100);	Bacteria~Myxococcota~Bradymonadia~Bradymonadales~Bradymonadaceae~Lujinxingia~Lujinxingia	94.286	0.0089	0	0	0	0	0	0.0069	0
OTU_1444	Bacteria(100);Planctomycetota(100);Phycisphaerae(100);Phycisphaerales(100);Phycisphaeraceae(100);uncultured(100);	Bacteria~Planctomycetota~Phycisphaerae~Phycisphaerales~Phycisphaeraceae~JAFIFY01~JAFIFY01	97.714	0	0	0	0	0	0	0.0345	0
OTU_1446	Eukaryota(100);Pavlovophyceae(98);Pavlovophyceae_cl(98);Pavlovophyceae_or(98);Pavlovophyceae_fa(98);Pavlovophyceae_fa(98);	Bacteria~Pseudomonadota~Alphaproteobacteria~Rhizobiales~Rhizobiaceae~Aureimonas_A~Aureimonas_A	98.571	0.0223	0	0	0	0	0	0	0
OTU_145	Bacteria(100);Proteobacteria(100);Gammaproteobacteria(100);Methylococcales(100);Methylomonadaceae(100);Methylomicrobium(99);	Bacteria~Pseudomonadota~Gammaproteobacteria~Methylococcales~Methylomonadaceae~Methylotuvimicrobium~Methylotuvimicrobium	95.442	0.2235	0.0126	0	0	0	0	0.1792	0
OTU_1450	unknown;unknown(0);unknown(0);unknown(0);unknown(0);unknown(0);			0.0089	0	0	0	0	0	0	0
OTU_1451	Bacteria(100);Caldatribacteriota(100);JS1(100);JS1_or(100);JS1_fa(100);JS1_ge(100);	Bacteria~Atribacterota~JS1~SB-45~34-128~34-128~34-128	92.593	0.0045	0	0	0	0	0	0.0207	0
OTU_146	Bacteria(100);Bacteria(100);Bacteria(100);Bacteria(100);Bacteria(100);Bacteria(100);	Bacteria~Pseudomonadota~Alphaproteobacteria~Sphingomonadales~Sphingomonadaceae~Allosphingosinicella~Allosphingosinicella	98	0	0.0671	0.0011	0	0.1484	0.1018	0	0
OTU_147	Bacteria(100);Proteobacteria(100);Alphaproteobacteria(100);Rhodobacterales(100);Rhodobacteraceae(100);Rubribacterium(99);	Bacteria~Pseudomonadota~Alphaproteobacteria~Rhodobacterales~Rhodobacteraceae~Rubrimonas~Rubrimonas	96.571	0.1252	0.0084	0	0.4505	0	0	0.317	0.0264
OTU_149	Bacteria(100);Proteobacteria(100);Gammaproteobacteria(100);Cellvibrionales(96);Porticoccaceae(96);Porticoccaceae(96);	Bacteria~Pseudomonadota~Gammaproteobacteria~Pseudomonadales~Porticoccaceae~50-400-T64~50-400-T64	93.714	0.0045	0.2392	0	0	0	0	0.0207	0
OTU_15	Bacteria(100);Proteobacteria(100);Gammaproteobacteria(100);Steroidobacterales(98);Woeseiaceae(98);JTB255_marine_benthic_group(97);	Bacteria~Pseudomonadota~Gammaproteobacteria~MnTg04~MnTg04~MnTg04~MnTg04	91.95	0.1475	0.021	1.5841	0.6757	0.3869	0.1696	0.6822	0.2201
OTU_150	Bacteria(100);Bacteria(100);Bacteria(100);Bacteria(100);Bacteria(100);Bacteria(100);	Bacteria~Pseudomonadota~Alphaproteobacteria~UBA7879~VGCX01~VGCX01~VGCX01	96.011	0	0	0	0	0	0.091	0	0
OTU_152	Bacteria(100);Proteobacteria(100);Gammaproteobacteria(100);Oceanospirillales(100);Pseudohongiellaceae(100);Pseudohongiella(100);	Bacteria~Pseudomonadota~Gammaproteobacteria~Pseudomonadales~Pseudohongiellaceae~Pseudohongiella~Pseudohongiella	94	0.0089	0.1972	0	0	0	0	0	0
OTU_153	Bacteria(100);Proteobacteria(100);Gammaproteobacteria(100);Oceanospirillales(100);Nitrincolaceae(100);Nitrincola(93);	Bacteria~Pseudomonadota~Gammaproteobacteria~Pseudomonadales~Nitrincolaceae~Nitrincola~Nitrincola	93.189	0.0536	0.9105	0	0	0.2067	0	0.124	0
OTU_154	Bacteria(100);Cyanobacteria(100);Cyanobacteriia(100);Cyanobacteriales(100);Nostocaceae(100);Nodularia_PCC-9350(97);	Bacteria~Cyanobacteriota~Cyanobacteriia~Cyanobacteriales~Nostocaceae~Nodularia~Nodularia	99.714	0.2727	0.0042	0	0.2252	0	0	0.379	0
OTU_155	Bacteria(100);Bacteroidota(100);Bacteroidia(100);Cytophagales(100);Cyclobacteriaceae(100);Lunatimonas(90);	Bacteria~Bacteroidota~Bacteroidia~Cytophagales~Cyclobacteriaceae~Lunatimonas~Lunatimonas	80.818	0.0179	0.0168	0.1448	0	0.0053	0.0018	0.0069	0
OTU_156	Bacteria(100);Firmicutes(100);Clostridia(100);Proteinivoracales(100);Proteinivoracales(100);Proteinivoracales(100);	Bacteria~Bacillota_D~Proteinivoracia~Proteinivoracales~Proteinivoraceae~Alkalicella~Alkalicella	93.976	0.5677	0	0	0.2252	0	0	0.2067	0
OTU_157	Bacteria(100);Proteobacteria(100);Gammaproteobacteria(100);Burkholderiales(100);Rhodocyclaceae(100);Azoarcus(99);	Bacteria~Pseudomonadota~Gammaproteobacteria~Burkholderiales~Rhodocyclaceae~Aromatoleum~Aromatoleum	92.571	0.3084	0.3776	0	0	0.0159	0.0196	0.1516	0
OTU_158	Bacteria(100);Bacteroidota(99);Bacteroidia(99);Cytophagales(88);Flammeovirgaceae(85);Flammeovirgaceae(85);	Bacteria~Bacteroidota~Bacteroidia~Cytophagales~Flammeovirgaceae~Flexithrix~Flexithrix	93.678	0	0	0	0	0.0053	0.1464	0	0
OTU_16	Bacteria(100);Bacteroidota(100);Bacteroidia(100);Cytophagales(100);Cyclobacteriaceae(100);Lunatimonas(95);	Bacteria~Bacteroidota~Bacteroidia~Cytophagales~Cyclobacteriaceae~Lunatimonas~Lunatimonas	94.602	0	0.0042	1.4187	0	0.0901	0.0018	0	0
OTU_162	Bacteria(100);Bacteroidota(100);Bacteroidia(100);Cytophagales(100);Amoebophilaceae(100);Candidatus_Amoebophilus(100);	Bacteria~Bacteroidota~Bacteroidia~Cytophagales~Amoebophilaceae~Amoebophilus~Amoebophilus	89.164	0	0	0.0213	0	0	0	0	0.0034
OTU_163	unknown;unknown(0);unknown(0);unknown(0);unknown(0);unknown(0);	Bacteria~Pseudomonadota~Alphaproteobacteria~Holosporales~Holosporaceae~Hydrogenosomobacter~Hydrogenosomobacter	94.286	0	0	0.0217	0	0.0106	0	0	0
OTU_164	unknown;unknown(0);unknown(0);unknown(0);unknown(0);unknown(0);	Bacteria~Bacillota~Bacilli~Paenibacillales~Paenibacillaceae~Paenibacillus~Paenibacillus	94.302	0.0045	0	0	0	0.0477	0.0875	0.0069	0.0034
OTU_165	Bacteria(100);Bacteroidota(100);Bacteroidia(100);Flavobacteriales(100);Crocinitomicaceae(100);Crocinitomicaceae(100);	Bacteria~Bacteroidota~Bacteroidia~Flavobacteriales~Crocinitomicaceae~Brumimicrobium~Brumimicrobium	99.714	0	0.0587	0	0	0	0.0553	0	0
OTU_166	Bacteria(100);Bacteroidota(100);Bacteroidia(100);Cytophagales(100);Cyclobacteriaceae(100);Cyclobacteriaceae_ge(100);	Bacteria~Bacteroidota~Bacteroidia~Cytophagales~Cyclobacteriaceae~Pleomorphovibrio~Pleomorphovibrio	94.556	0.0894	0.0042	0	0	0	0	0.2067	0
OTU_167	Bacteria(100);Proteobacteria(100);Gammaproteobacteria(100);Pseudomonadales(83);Pseudomonadaceae(82);Pseudomonadaceae(82);	Bacteria~Pseudomonadota~Gammaproteobacteria~Pseudomonadales~Pseudomonadaceae~Halopseudomonas~Halopseudomonas	94.302	0.0179	0.1217	0	0	0	0.025	0.0689	0
OTU_17	Bacteria(100);Proteobacteria(100);Gammaproteobacteria(100);Oceanospirillales(100);Halomonadaceae(100);Halomonas(100);	Bacteria~Pseudomonadota~Gammaproteobacteria~Pseudomonadales~Halomonadaceae~Halomonas~Halomonas	91.139	0.0849	0.0462	0.7231	0	0	2.8635	0.1378	0.0172
OTU_171	Bacteria(100);Proteobacteria(100);Alphaproteobacteria(100);Rhizobiales(100);Devosiaceae(100);Pelagibacterium(100);	Bacteria~Pseudomonadota~Alphaproteobacteria~Rhizobiales~Devosiaceae~Pelagibacterium~Pelagibacterium	99.714	0	0	0.0203	0	0	0	0	0
OTU_172	Bacteria(100);Actinobacteriota(96);Actinobacteriota(96);Actinobacteriota(96);Actinobacteriota(96);Actinobacteriota(96);	Bacteria~Actinomycetota~Actinomycetia~Nanopelagicales~S36-B12~Mxb001~Mxb001	99.714	0.0045	0	0	2.7027	0	0	0.2757	0
OTU_173	Bacteria(100);Proteobacteria(100);Alphaproteobacteria(100);Rickettsiales(100);Rickettsiaceae(100);Candidatus_Megaira(100);	Bacteria~Pseudomonadota~Alphaproteobacteria~Rickettsiales~Rickettsiaceae~GCA-2402195~GCA-2402195	94.081	0.0089	0	0.011	0	0.0053	0.0357	0.0069	0.0023
OTU_175	Bacteria(100);Planctomycetota(100);Phycisphaerae(100);Phycisphaerales(100);Phycisphaeraceae(100);Urania-1B-19_marine_sediment_group(89);	Bacteria~Planctomycetota~Phycisphaerae~Phycisphaerales~SM1A02~JACZRS01~JACZRS01	88.796	0.0045	0	0	0.2252	0	0	0.3377	0
OTU_176	Bacteria(100);Desulfobacterota(100);Desulfovibrionia(100);Desulfovibrionales(100);Desulfonatronaceae(100);Desulfonatronum(100);	Bacteria~Desulfobacterota~Desulfovibrionia~Desulfovibrionales~Desulfonatronaceae~Desulfonatronum~Desulfonatronum	97.429	0.0849	0	0	0	0	0	0.3032	0.016
OTU_177	Bacteria(100);Proteobacteria(100);Gammaproteobacteria(100);Competibacterales(100);Competibacteraceae(100);Candidatus_Competibacter(100);	Bacteria~Pseudomonadota~Gammaproteobacteria~Competibacterales~Competibacteraceae~Competibacter_A~Competibacter_A	93.714	0.1252	0	0	0	0	0	0.3515	0.0011
OTU_178	Bacteria(100);Bacteroidota(100);Bacteroidia(100);Bacteroidales(100);ML635J-40_aquatic_group(100);ML635J-40_aquatic_group_ge(100);	Bacteria~Bacteroidota~Bacteroidia~Bacteroidales~UBA7960~SKVR01~SKVR01	97.429	0.1564	0.0042	0	0	0	0	0.2136	0
OTU_179	Bacteria(100);Firmicutes(100);Clostridia(100);Peptostreptococcales-Tissierellales(99);Peptostreptococcaceae(86);uncultured(84);	Bacteria~Bacillota_A~Clostridia~Peptostreptococcales~T1SED10-28~Isachenkonia~Isachenkonia	91.714	0.5453	0	0	0	0	0	0.2825	0
OTU_18	Bacteria(99);Bacteria(99);Bacteria(99);Bacteria(99);Bacteria(99);Bacteria(99);	Bacteria~Bdellovibrionota~UBA2394~UBA2394~UBA2394~1-14-0-20-45-16~1-14-0-20-45-16	91.429	0	0	1.328	0	0	0	0.0276	0
OTU_180	Bacteria(100);Proteobacteria(100);Alphaproteobacteria(100);Rhizobiales(100);Rhizobiaceae(100);Rhizobiaceae(100);	Bacteria~Pseudomonadota~Alphaproteobacteria~Rhizobiales~Rhizobiaceae~Mesorhizobium~Mesorhizobium	92.593	0	0	0.0633	0	0	0	0	0
OTU_181	Bacteria(100);Bacteroidota(100);Bacteroidia(100);Cytophagales(100);Cyclobacteriaceae(100);Cyclobacteriaceae(100);	Bacteria~Bacteroidota~Bacteroidia~Cytophagales~Cyclobacteriaceae~Mongoliibacter~Mongoliibacter	98.286	0.0045	0.021	0.0317	0	0.3233	0	0.0207	0
OTU_183	Bacteria(100);Spirochaetota(100);Spirochaetia(100);Spirochaetales(100);Spirochaetaceae(100);Spirochaetaceae(100);	Bacteria~Spirochaetota~Spirochaetia~DSM-27196~SKKC01~SKKC01~SKKC01	86.648	0.1296	0	0	0.2252	0	0	0.1034	0.0023
OTU_185	Bacteria(100);Proteobacteria(100);Gammaproteobacteria(100);Oceanospirillales(100);Saccharospirillaceae(100);Saccharospirillum(100);	Bacteria~Pseudomonadota~Gammaproteobacteria~Pseudomonadales~Natronospirillaceae~Saccharospirillum~Saccharospirillum	90.164	0.0089	0.0545	0.0032	0	0.0106	0.0179	0.1654	0
OTU_186	Bacteria(100);Proteobacteria(100);Alphaproteobacteria(100);Rhodobacterales(100);Rhodobacteraceae(100);Rhodobacteraceae(100);	Bacteria~Pseudomonadota~Alphaproteobacteria~Rhodobacterales~Rhodobacteraceae~Pararhodobacter~Pararhodobacter	98.857	0.0849	0.0713	0.0043	0	0.8534	0.0161	0.2481	0.0023
OTU_188	Bacteria(100);Actinobacteriota(100);Actinobacteria(100);Nitriliruptorales(100);Nitriliruptoraceae(100);Nitriliruptoraceae_ge(95);	Bacteria~Actinomycetota~Actinomycetia~Nitriliruptorales~Nitriliruptoraceae~Nitriliruptor~Nitriliruptor	92.571	0.0179	0	0	0	0	0.1625	0.0069	0
OTU_189	Bacteria(100);Bacteria(100);Bacteria(100);Bacteria(100);Bacteria(100);Bacteria(100);	Bacteria~Bdellovibrionota~UBA2361~UBA2361~RFPC01~RFPC01~RFPC01	93.143	0	0	0.0142	0	0	0	0	0
OTU_19	Bacteria(100);Proteobacteria(100);Alphaproteobacteria(100);Rhizobiales(100);Beijerinckiaceae(100);Salinarimonas(100);	Bacteria~Pseudomonadota~Alphaproteobacteria~Rhizobiales~Beijerinckiaceae~Saliniramus~Saliniramus	94	0.6258	0.0839	0.5442	1.5766	3.8482	0.382	1.2198	0.7795
OTU_190	Bacteria(100);Actinobacteriota(100);Actinobacteria(100);Nitriliruptorales(100);Nitriliruptoraceae(100);Nitriliruptoraceae(100);	Bacteria~Actinomycetota~Actinomycetia~Nitriliruptorales~Nitriliruptoraceae~Egicoccus~Egicoccus	99.143	0.3799	0	0.0004	0.2252	0	0.0036	0.1378	0.0069
OTU_191	Bacteria(100);Actinobacteriota(100);Actinobacteria(100);Nitriliruptorales(100);Nitriliruptoraceae(100);Nitriliruptoraceae_ge(96);	Bacteria~Actinomycetota~Actinomycetia~Nitriliruptorales~Nitriliruptoraceae~Egicoccus~Egicoccus	90.598	0.1252	0.0042	0	0.9009	0	0	0.1792	0
OTU_192	Bacteria(100);Bacteroidota(100);Rhodothermia(100);Balneolales(100);Balneolaceae(100);ML310M-34(92);	Bacteria~Bacteroidota~Rhodothermia~Balneolales~Cyclonatronaceae~Cyclonatronum~Cyclonatronum	90.341	0	0	0.0004	0	0.0053	0	0.0551	0.0287
OTU_193	Bacteria(100);Proteobacteria(100);Gammaproteobacteria(100);Burkholderiales(100);Burkholderiaceae(100);Ralstonia(100);	Bacteria~Pseudomonadota~Gammaproteobacteria~Enterobacterales~Enterobacteriaceae~Serratia~Serratia	99.714	0.0089	0.0462	0.0007	0	0.1007	0	0.0689	0
OTU_194	Bacteria(80);Bacteria(80);Bacteria(80);Bacteria(80);Bacteria(80);Bacteria(80);	Bacteria~Pseudomonadota~Alphaproteobacteria~Rickettsiales~Rickettsiaceae~JADHZC01~JADHZC01	91.477	0.0045	0.1301	0	0	0	0	0	0.0149
OTU_197	Bacteria(100);Planctomycetota(100);Planctomycetes(100);Pirellulales(100);Pirellulaceae(100);Pirellulaceae(100);	Bacteria~Planctomycetota~Planctomycetia~Pirellulales~Pirellulaceae~UWMA-0346~UWMA-0346	96.581	0.0134	0	0	0	0	0	0.2481	0
OTU_198	Bacteria(100);Spirochaetota(100);Spirochaetia(100);Spirochaetales(100);Spirochaetaceae(100);Spirochaeta_2(100);	Bacteria~Spirochaetota~Spirochaetia~DSM-27196~SKKC01~SKKC01~SKKC01	97.143	0.076	0	0	0.2252	0	0	0.0758	0.0115
OTU_199	Bacteria(100);Proteobacteria(100);Alphaproteobacteria(100);Kiloniellales(100);Fodinicurvataceae(100);uncultured(100);	Bacteria~Pseudomonadota~Alphaproteobacteria~Kiloniellales~DSM-21159~Fodinicurvata~Fodinicurvata	92.593	0	0	0.0132	0	0	0	0	0
OTU_2	Bacteria(100);Cyanobacteria(100);Cyanobacteriia(100);Cyanobacteriales(100);Geitlerinemaceae(100);Geitlerinema_PCC-7105(100);	Bacteria~Cyanobacteriota~Cyanobacteriia~Cyanobacteriales~Geitlerinemaceae~Sodalinema~Sodalinema	98.857	0	0.0378	0.0092	0	0.3392	68.0211	0.1309	48.9729
OTU_20	Bacteria(100);Cyanobacteria(100);Cyanobacteriia(100);Chloroplast(100);Chloroplast_fa(100);Chloroplast_ge(100);	Bacteria~Cyanobacteriota~Cyanobacteriia~Cyanobacteriales~Coleofasciculaceae~Caldora~Caldora	98.571	10.8305	3.235	0.0004	0	0	0	1.4403	0.0034
OTU_200	Bacteria(100);Bacteroidota(100);Rhodothermia(100);Balneolales(100);Balneolaceae(100);F1-37X2(98);	Bacteria~Bacteroidota~Rhodothermia~Balneolales~Natronogracilivirgulaceae~Natronogracilivirgula~Natronogracilivirgula	89.489	0.0358	0	0.0121	0.6757	0	0	0.2688	0
OTU_201	Bacteria(100);Cyanobacteria(100);Cyanobacteriia(100);Chloroplast(90);Chloroplast_fa(90);Chloroplast_ge(90);	Bacteria~Bacillota~Bacilli~Bacillales_K~Sporolactobacillaceae~Sporolactobacillus~Sporolactobacillus	92.593	0.0179	0	0	0	0	0	0.255	0
OTU_202	Bacteria(100);Bacteroidota(100);Bacteroidia(100);Chitinophagales(96);Saprospiraceae(96);uncultured(92);	Bacteria~Bacteroidota~Bacteroidia~Chitinophagales~Saprospiraceae~SLDF01~SLDF01	97.143	0	0.1888	0	0	0	0	0	0
OTU_208	Bacteria(100);Cyanobacteria(100);Cyanobacteriia(100);Cyanobacteriales(100);Cyanobacteriaceae(96);Chroococcus_HUW_799(95);	Bacteria~Cyanobacteriota~Cyanobacteriia~Cyanobacteriales~Xenococcaceae~Stanieria~Stanieria	87.749	0.1877	0	0	0	0	0	0	0
OTU_209	Bacteria(100);Actinobacteriota(100);Actinobacteria(100);Micrococcales(100);Micrococcaceae(100);Nesterenkonia(100);	Bacteria~Actinomycetota~Actinomycetia~Actinomycetales~Micrococcaceae~Nesterenkonia~Nesterenkonia	99.714	0.2101	0	0	0	0	0	0.0138	0
OTU_21	Bacteria(97);Bacteria(97);Bacteria(97);Bacteria(97);Bacteria(97);Bacteria(97);	Bacteria~Verrucomicrobiota~Kiritimatiellia~JAAZAB01~VSJD01~JAHIJO01~JAHIJO01	91.143	0.0223	0.042	0.0295	0.2252	0.3339	5.5182	0	0
OTU_211	Bacteria(100);Bacteroidota(100);Bacteroidia(100);Bacteroidales(100);ML635J-40_aquatic_group(100);ML635J-40_aquatic_group_ge(100);	Bacteria~Bacteroidota~Bacteroidia~Bacteroidales~UBA7960~SKVR01~SKVR01	99.429	0.0626	0.0126	0	0	0	0	0.1378	0
OTU_212	Bacteria(100);Bacteroidota(100);Bacteroidia(100);Bacteroidales(100);ML635J-40_aquatic_group(100);ML635J-40_aquatic_group_ge(100);	Bacteria~Chloroflexota~Chloroflexia~Chloroflexales~Chloroflexaceae~Chloroploca~Chloroploca	98.571	0.2816	0.0042	0	0	0	0	0	0
OTU_214	unknown;unknown(0);unknown(0);unknown(0);unknown(0);unknown(0);	Bacteria~Cyanobacteriota~Cyanobacteriia~Phormidesmiales~Phormidesmiaceae~Leptothoe~Leptothoe	94.017	0	0	0	0	0	0.0607	0	0
OTU_215	Bacteria(100);Proteobacteria(100);Gammaproteobacteria(100);Alteromonadales(100);Alteromonadaceae(100);Alteromonadaceae(100);	Bacteria~Pseudomonadota~Gammaproteobacteria~Enterobacterales_A~Alteromonadaceae~Arsukibacterium~Arsukibacterium	95.751	0.0045	0.1804	0.0007	0	0	0.0018	0.0069	0
OTU_216	Bacteria(100);Cyanobacteria(100);Cyanobacteriia(100);Cyanobacteriales(100);Geitlerinemaceae(100);Geitlerinema_PCC-7105(100);	Bacteria~Cyanobacteriota~Cyanobacteriia~Cyanobacteriales~Geitlerinemaceae~Sodalinema~Sodalinema	95.714	0	0	0	0	0	0.2142	0	0.1444
OTU_218	Bacteria(100);Chloroflexi(100);Anaerolineae(100);Ardenticatenales(100);uncultured(100);uncultured_ge(100);	Bacteria~Chloroflexota~Anaerolineae~Promineofilales~Promineofilaceae~JADJUV01~JADJUV01	81.62	0.0179	0	0	0	0	0	0.1861	0
OTU_219	Bacteria(100);Cyanobacteria(100);Cyanobacteriia(100);Chloroplast(98);Chloroplast_fa(98);Chloroplast_ge(98);	Bacteria~Bacillota~Bacilli~Bacillales_K~Sporolactobacillaceae~Sporolactobacillus~Sporolactobacillus	89.205	0	0	0.0622	0	0	0	0	0
OTU_22	Bacteria(100);Proteobacteria(100);Gammaproteobacteria(100);Oceanospirillales(100);Nitrincolaceae(100);Nitrincola(100);	Bacteria~Pseudomonadota~Gammaproteobacteria~Pseudomonadales~Nitrincolaceae~Nitrincola~Nitrincola	99.429	0	15.0506	0	0	0.0053	0	0	0
OTU_222	Bacteria(100);Actinobacteriota(100);Actinobacteria(100);Nitriliruptorales(100);Nitriliruptoraceae(100);Egicoccus(100);	Bacteria~Actinomycetota~Actinomycetia~Nitriliruptorales~Nitriliruptoraceae~Egicoccus~Egicoccus	94	0.5409	0	0	0	0	0	0	0
OTU_225	Bacteria(100);Verrucomicrobiota(100);Verrucomicrobiae(100);Opitutales(100);Puniceicoccaceae(100);Puniceicoccaceae(100);	Bacteria~Verrucomicrobiota~Verrucomicrobiae~Opitutales~DSM-45221~WN38~WN38	96	0.0447	0.0126	0	0	0.2173	0	0.0345	0
OTU_227	Bacteria(100);Firmicutes(100);Clostridia(100);Peptostreptococcales-Tissierellales(100);Peptostreptococcales-Tissierellales_fa(100);Anoxynatronum(100);	Bacteria~Bacillota_A~Clostridia~Peptostreptococcales~Tindalliaceae~Tindallia~Tindallia	94.857	0.3263	0.0126	0	0	0	0	0.1447	0
OTU_228	Bacteria(100);Planctomycetota(100);Planctomycetes(100);Pirellulales(100);Pirellulaceae(100);Blastopirellula(100);	Bacteria~Planctomycetota~Planctomycetia~Pirellulales~Pirellulaceae~Mariniblastus~Mariniblastus	95.69	0.0089	0	0.0004	0	0.0265	0	0.1034	0
OTU_23	Bacteria(100);Gemmatimonadota(100);BD2-11_terrestrial_group(100);BD2-11_terrestrial_group_or(100);BD2-11_terrestrial_group_fa(100);BD2-11_terrestrial_group_ge(100);	Bacteria~Gemmatimonadota~Gemmatimonadetes~Longimicrobiales~UBA6960~JACZXQ01~JACZXQ01	93.123	0.0849	0.021	1.0257	0	0	0.0054	0.4548	0
OTU_230	Bacteria(100);Planctomycetota(100);Phycisphaerae(100);Phycisphaerales(100);Phycisphaeraceae(100);CL500-3(93);	Bacteria~Planctomycetota~Phycisphaerae~Phycisphaerales~SM1A02~VGXK01~VGXK01	94.034	0.0045	0	0	0.2252	0	0	0.1723	0
OTU_232	Bacteria(100);Verrucomicrobiota(100);Verrucomicrobiae(100);Opitutales(100);Opitutales(100);Opitutales(100);	Bacteria~Pseudomonadota~Gammaproteobacteria~Pseudomonadales~Pseudohongiellaceae~UBA9145~UBA9145	91.714	0	0	0	0	0	0.0161	0.0276	0.0206
OTU_233	Bacteria(100);Proteobacteria(100);Gammaproteobacteria(99);Oceanospirillales(99);Halomonadaceae(99);Marinospirillum(99);	Bacteria~Pseudomonadota~Gammaproteobacteria~Pseudomonadales~Halomonadaceae~Marinospirillum~Marinospirillum	97.429	0.0045	0.0923	0	0	0.0053	0	0	0
OTU_234	Bacteria(100);Planctomycetota(100);Phycisphaerae(100);Phycisphaerales(100);Phycisphaeraceae(100);SM1A02(100);	Bacteria~Planctomycetota~Phycisphaerae~Phycisphaerales~UBA1924~JACKHC01~JACKHC01	85.174	0	0	0.0555	0	0	0	0	0
OTU_236	unknown;unknown(0);unknown(0);unknown(0);unknown(0);unknown(0);	Bacteria~Patescibacteria~Gracilibacteria~Peribacterales~Peribacteraceae~VGKZ01~VGKZ01	96	0	0	0	0	0	0.0518	0	0
OTU_237	Bacteria(100);Proteobacteria(100);Alphaproteobacteria(100);Caulobacterales(100);Hyphomonadaceae(100);Hyphomonadaceae(100);	Bacteria~Pseudomonadota~Alphaproteobacteria~Caulobacterales~Maricaulaceae~Glycocaulis~Glycocaulis	91.954	0	0	0.0285	0	0	0.0018	0	0
OTU_238	Bacteria(100);Spirochaetota(100);Spirochaetia(100);Spirochaetales(100);Spirochaetaceae(100);Spirochaeta_2(100);	Bacteria~Spirochaetota~Spirochaetia~DSM-27196~SKKC01~SKKC01~SKKC01	90.208	0.0626	0	0	0	0	0	0.1378	0
OTU_24	Bacteria(100);Deinococcota(100);Deinococci(100);Deinococcales(100);Trueperaceae(100);Truepera(100);	Bacteria~Deinococcota~Deinococci~Deinococcales~Trueperaceae~JAABTL01~JAABTL01	90.286	0.2905	0.0294	0	0	0.0106	0.0982	0.0758	2.8944
OTU_241	Bacteria(100);Proteobacteria(100);Alphaproteobacteria(100);uncultured(98);uncultured_fa(98);uncultured_ge(98);	Bacteria~Pseudomonadota~Alphaproteobacteria~Rhizobiales~Im1~Rhodoligotrophos~Rhodoligotrophos	98.286	0.2056	0	0	0	0	0	0.0069	0
OTU_242	Bacteria(100);Verrucomicrobiota(100);Verrucomicrobiae(100);Opitutales(100);Puniceicoccaceae(100);Verruc-01(100);	Bacteria~Verrucomicrobiota~Verrucomicrobiae~Opitutales~Verruco-01~JAFIGG01~JAFIGG01	85.423	0.0089	0.1049	0.0011	0	0	0	0	0
OTU_244	Bacteria(100);Proteobacteria(100);Alphaproteobacteria(100);Rhodobacterales(100);Rhodobacteraceae(100);Seohaeicola(94);	Bacteria~Pseudomonadota~Alphaproteobacteria~Rhodobacterales~Rhodobacteraceae~EhC02~EhC02	96	0.2011	0.0545	0.0004	0	0.0477	0	0.2894	0
OTU_246	Bacteria(100);Bacteroidota(100);Bacteroidia(100);Flavobacteriales(99);Cryomorphaceae(95);uncultured(95);	Bacteria~Bacteroidota~Bacteroidia~Flavobacteriales~Schleiferiaceae~Owenweeksia~Owenweeksia	92.286	0.0805	0	0	0	0	0	0.0207	0
OTU_247	Bacteria(100);Verrucomicrobiota(100);Verrucomicrobiae(100);Opitutales(100);Puniceicoccaceae(100);Verruc-01(100);	Bacteria~Verrucomicrobiota~Verrucomicrobiae~Opitutales~KCTC-12870~Ruficoccus~Ruficoccus	97.151	0	0.0965	0	0	0	0	0	0
OTU_25	Bacteria(100);Proteobacteria(100);Gammaproteobacteria(100);Nitrosococcales(100);Methylophagaceae(100);Methylophaga(100);	Bacteria~Pseudomonadota~Gammaproteobacteria~Nitrosococcales~Methylophagaceae~Methylophaga~Methylophaga	99.062	0.3174	10.6029	0.0036	0	1.4948	0.1321	0.1861	0
OTU_253	Bacteria(100);Proteobacteria(100);Gammaproteobacteria(100);Oceanospirillales(99);Alcanivoracaceae1(97);Alcanivorax(97);	Bacteria~Pseudomonadota~Gammaproteobacteria~Pseudomonadales~Alcanivoracaceae~Alcanivorax_A~Alcanivorax_A	97.714	0	0.0168	0	0	0.0689	0.0232	0	0
OTU_256	Bacteria(100);Chloroflexi(100);Chloroflexia(100);Thermomicrobiales(100);Thermomicrobiaceae(100);Nitrolancea(100);	Bacteria~Chloroflexota~Chloroflexia~Thermomicrobiales~Thermomicrobiaceae~Nitrolancea~Nitrolancea	98.286	0.0626	0	0.0021	0.4505	0	0	0.1034	0.0057
OTU_257	Bacteria(100);Proteobacteria(100);Gammaproteobacteria(100);Gammaproteobacteria(100);Gammaproteobacteria(100);Gammaproteobacteria(100);	Bacteria~Pseudomonadota~Gammaproteobacteria~Pseudomonadales~Natronospirillaceae~Natronospirillum~Natronospirillum	93.732	0	0	0	0	0	0.0428	0	0
OTU_258	Bacteria(100);Actinobacteriota(100);Acidimicrobiia(100);Microtrichales(100);Microtrichaceae(100);IMCC26207(100);	Bacteria~Actinomycetota~Acidimicrobiia~Acidimicrobiales~Microtrichaceae~IMCC26207~IMCC26207	97.151	0.0179	0.0042	0	0	0	0	0.2067	0
OTU_26	Bacteria(100);Proteobacteria(100);Alphaproteobacteria(100);Rhizobiales(100);Rhizobiaceae(100);Rhizobiaceae(100);	Bacteria~Pseudomonadota~Alphaproteobacteria~Rhizobiales~Rhizobiaceae~Chelativorans_A~Chelativorans_A	93.714	0.0313	0.0084	0.9464	0	0.0954	0.0339	0.0482	0
OTU_260	Bacteria(100);Bacteria(100);Bacteria(100);Bacteria(100);Bacteria(100);Bacteria(100);	Bacteria~Sumerlaeota~Sumerlaeia~SLMS01~JAHLLQ01~JAHLLQ01~JAHLLQ01	81.416	0	0	0.0071	0	0	0	0	0.0011
OTU_261	Bacteria(100);Cyanobacteria(100);Cyanobacteriia(100);Phormidesmiales(100);Nodosilineaceae(100);Nodosilinea_PCC-7104(100);	Bacteria~Cyanobacteriota~Cyanobacteriia~Phormidesmiales~Phormidesmiaceae~Nodosilinea~Nodosilinea	98.571	0.1833	0.0294	0	0.6757	0.0053	0	1.4747	0
OTU_263	Bacteria(100);Chloroflexi(100);Anaerolineae(100);Anaerolineales(100);Anaerolineaceae(100);ADurb.Bin120(100);	Bacteria~Chloroflexota~Anaerolineae~Anaerolineales~Anaerolineaceae~Brevefilum~Brevefilum	96.571	0.2146	0	0	0	0	0	0.1103	0
OTU_265	Bacteria(100);Gemmatimonadota(94);Longimicrobia(94);Longimicrobiales(94);Longimicrobiaceae(94);Longimicrobiaceae_ge(92);	Bacteria~Gemmatimonadota~Gemmatimonadetes~Longimicrobiales~Longimicrobiaceae~Longimicrobium~Longimicrobium	92.114	0.1207	0	0	0	0	0	0	0
OTU_267	Bacteria(100);Bacteroidota(100);Bacteroidia(100);Bacteroidales(100);ML635J-40_aquatic_group(100);ML635J-40_aquatic_group_ge(100);	Bacteria~Chloroflexota~Chloroflexia~Chloroflexales~Chloroflexaceae~Chloroploca~Chloroploca	99.429	0.2905	0	0	0	0	0	0.0207	0
OTU_268	Bacteria(100);Verrucomicrobiota(100);Verrucomicrobiae(100);Verrucomicrobiales(100);DEV007(100);DEV007_ge(100);	Bacteria~Verrucomicrobiota~Verrucomicrobiae~Verrucomicrobiales~DEV007~JAEUHH01~JAEUHH01	93.429	0	0.0042	0	0	0	0	0.1378	0
OTU_269	Bacteria(100);Bacteroidota(100);Bacteroidia(100);Bacteroidales(99);ML635J-40_aquatic_group(91);ML635J-40_aquatic_group_ge(91);	Bacteria~Bacteroidota~Bacteroidia~Bacteroidales~UBA7960~SKVR01~SKVR01	94.286	0.0715	0	0	0	0	0	0.0413	0
OTU_27	Bacteria(100);Cyanobacteria(100);Cyanobacteriia(100);Cyanobacteriales(100);Oscillatoriaceae(100);Oscillatoria_PCC-6304(100);	Bacteria~Cyanobacteriota~Cyanobacteriia~Cyanobacteriales~PCC-6304~PCC-6304~PCC-6304	90.028	0.371	9.898	0	0	0.0053	0	0.0965	0
OTU_270	Bacteria(100);Actinobacteriota(100);Actinobacteria(100);Corynebacteriales(100);Dietziaceae(100);Dietzia(100);	Bacteria~Actinomycetota~Actinomycetia~Mycobacteriales~Mycobacteriaceae~Dietzia~Dietzia	84.762	0	0	0.0057	0	0	0	0	0
OTU_275	Bacteria(100);Firmicutes(100);Dethiobacteria(100);Dethiobacterales(100);Dethiobacteraceae(100);uncultured(100);	Bacteria~Bacillota_D~Dethiobacteria~Dethiobacterales~Dethiobacteraceae~Dethiobacter~Dethiobacter	91.743	0.1699	0	0	0.4505	0	0	0.2619	0
OTU_276	Bacteria(100);Proteobacteria(100);Gammaproteobacteria(100);Burkholderiales(100);Alcaligenaceae(100);GKS98_freshwater_group(96);	Bacteria~Pseudomonadota~Gammaproteobacteria~Burkholderiales~Burkholderiaceae_C~Algicoccus~Algicoccus	96.522	0	0.0462	0.0032	0	0.0053	0.0054	0.0138	0
OTU_277	Bacteria(100);Proteobacteria(100);Alphaproteobacteria(100);Acetobacterales(100);Acetobacteraceae(100);Acetobacteraceae(100);	Bacteria~Pseudomonadota~Alphaproteobacteria~Acetobacterales~Acetobacteraceae~Roseococcus~Roseococcus	98.857	0.0805	0.0042	0.0025	0	0	0	0.1103	0.0195
OTU_28	Bacteria(100);Spirochaetota(100);Spirochaetia(100);Spirochaetales(100);Spirochaetaceae(100);Spirochaeta_2(96);	Bacteria~Spirochaetota~Spirochaetia~DSM-27196~SKKC01~SKKC01~SKKC01	99.714	0.0179	0.0042	0	0.4505	0.0265	0.1482	0.0413	3.3586
OTU_280	unknown;unknown(0);unknown(0);unknown(0);unknown(0);unknown(0);			0	0	0	0	0	0.0678	0	0.0241
OTU_281	Bacteria(100);Proteobacteria(100);Alphaproteobacteria(100);Tistrellales(97);Geminicoccaceae(97);Geminicoccaceae(97);	Bacteria~Pseudomonadota~Alphaproteobacteria~Geminicoccales~Geminicoccaceae~SLRI01~SLRI01	92	0.0715	0	0	0	0	0	0.1034	0.0011
OTU_282	Bacteria(100);Bacteroidota(100);Bacteroidia(100);Flavobacteriales(100);Flavobacteriaceae(100);Planktosalinus(100);	Bacteria~Bacteroidota~Bacteroidia~Flavobacteriales~Flavobacteriaceae~Planktosalinus~Planktosalinus	91.404	0.1475	0.0126	0	0	0	0	0.1172	0
OTU_285	Bacteria(100);Verrucomicrobiota(100);Verrucomicrobiae(100);Verrucomicrobiales(100);Rubritaleaceae(100);Rubritaleaceae(100);	Bacteria~Verrucomicrobiota~Verrucomicrobiae~Verrucomicrobiales~Akkermansiaceae~Luteolibacter~Luteolibacter	99.714	0.0223	0.0336	0	0	0.0159	0	0.2481	0
OTU_286	Bacteria(91);Proteobacteria(85);Proteobacteria(85);Proteobacteria(85);Proteobacteria(85);Proteobacteria(85);	Bacteria~Desulfobacterota~Desulfobacteria~Desulfobacterales~Desulfosarcinaceae~UBA2230~UBA2230	90.857	0.0894	0	0	0	0	0	0	0
OTU_288	Bacteria(100);Bacteroidota(100);Bacteroidia(100);Chitinophagales(96);Saprospiraceae(96);Saprospiraceae(96);	Bacteria~Bacteroidota~Bacteroidia~Chitinophagales~Saprospiraceae~JABDMH01~JABDMH01	93.143	0.0939	0	0	0	0	0	0.0413	0
OTU_29	Bacteria(100);Bacteroidota(100);Bacteroidia(100);Cytophagales(100);Cyclobacteriaceae(100);Anditalea(93);	Bacteria~Bacteroidota~Bacteroidia~Cytophagales~Cyclobacteriaceae~Anditalea~Anditalea	96	9.5611	0.0084	0	2.027	0.0053	0	1.5505	0
OTU_293	Bacteria(100);Actinobacteriota(100);Acidimicrobiia(99);Microtrichales(99);uncultured(90);uncultured_ge(90);	Bacteria~Actinomycetota~Acidimicrobiia~Acidimicrobiales~UBA8139~JAFIEP01~JAFIEP01	90.625	0.0045	0	0.006	0	0	0	0.0207	0
OTU_297	Bacteria(100);Proteobacteria(100);Gammaproteobacteria(100);Oceanospirillales(100);Saccharospirillaceae(100);Salinispirillum(100);	Bacteria~Pseudomonadota~Gammaproteobacteria~Pseudomonadales~Natronospirillaceae~Natronospirillum~Natronospirillum	92.571	0.0045	0.0378	0	0	0.1272	0	0.0069	0
OTU_298	Bacteria(100);Proteobacteria(100);Gammaproteobacteria(100);Legionellales(100);Legionellaceae(100);Legionella(100);	Bacteria~Pseudomonadota~Gammaproteobacteria~Legionellales~Legionellaceae~Legionella_C~Legionella_C	91.714	0	0	0	0	0.1113	0.0089	0	0
OTU_299	Bacteria(100);Verrucomicrobiota(100);Verrucomicrobiae(100);Opitutales(100);Opitutaceae(100);Opitutaceae(100);	Bacteria~Verrucomicrobiota~Verrucomicrobiae~Opitutales~Opitutaceae~Cephaloticoccus~Cephaloticoccus	99.714	0	0.0587	0	0	0	0	0	0
OTU_3	Bacteria(100);Planctomycetota(100);Phycisphaerae(100);Phycisphaerales(100);Phycisphaeraceae(100);SM1A02(100);	Bacteria~Planctomycetota~Phycisphaerae~Phycisphaerales~UBA1924~JANSXG01~JANSXG01	99.143	0.0089	0.0042	12.0774	0	0.0689	0.2589	0.0758	0
OTU_30	Bacteria(100);Proteobacteria(100);Gammaproteobacteria(100);Alteromonadales(100);Alteromonadales_Incertae_Sedis(100);Alkalimonas(100);	Bacteria~Pseudomonadota~Gammaproteobacteria~Enterobacterales_A~Alteromonadaceae~Alkalimonas~Alkalimonas	98.311	0.4827	7.07	0.0085	0	0.0795	0.3088	0.2205	0.0126
OTU_302	Bacteria(100);Acidobacteriota(100);Thermoanaerobaculia(100);Thermoanaerobaculales(100);Thermoanaerobaculaceae(100);Thermoanaerobaculum(100);	Bacteria~Acidobacteriota~Thermoanaerobaculia~Thermoanaerobaculales~Thermoanaerobaculaceae~RBG-13-68-16~RBG-13-68-16	81.707	0.0402	0	0	0	0	0	0.0413	0
OTU_303	Bacteria(100);Firmicutes(100);Thermoanaerobacteria(100);Thermoanaerobacterales(100);SRB2(100);SRB2_ge(100);	Bacteria~Bacillota_A~Clostridia~UMGS1840~HGM11507~HGM11507~HGM11507	83.944	0.067	0	0	0	0	0	0.0345	0
OTU_304	Bacteria(100);Bacteroidota(100);Bacteroidia(100);Flavobacteriales(100);Crocinitomicaceae(100);Crocinitomicaceae(100);	Bacteria~Bacteroidota~Bacteroidia~Flavobacteriales~Crocinitomicaceae~Brumimicrobium~Brumimicrobium	90.769	0.0045	0.0839	0	0	0	0	0	0
OTU_308	Bacteria(100);Bacteroidota(100);Bacteroidia(100);Bacteroidales(100);ML635J-40_aquatic_group(100);ML635J-40_aquatic_group_ge(100);	Bacteria~Chloroflexota~Chloroflexia~Chloroflexales~Chloroflexaceae~Chloroploca~Chloroploca	92.286	0.1073	0	0	0	0	0	0.0689	0
OTU_309	Bacteria(100);Cyanobacteria(100);Cyanobacteriia(100);Chloroplast(100);Chloroplast_fa(100);Chloroplast_ge(100);	Bacteria~Cyanobacteriota~Cyanobacteriia~Cyanobacteriales~Coleofasciculaceae~Caldora~Caldora	91.453	0.5543	1.6993	0.0071	0	0.0053	0	0.4479	0
OTU_31	Bacteria(100);Cyanobacteria(100);Cyanobacteriia(100);Phormidesmiales(100);Nodosilineaceae(100);Nodosilinea_PCC-7104(100);	Bacteria~Cyanobacteriota~Cyanobacteriia~Phormidesmiales~Phormidesmiaceae~Nodosilinea~Nodosilinea	95.143	0.3576	0.0042	0	6.5315	0	0	8.3109	0.5433
OTU_310	Eukaryota(83);Eukaryota(83);Eukaryota(83);Eukaryota(83);Eukaryota(83);Eukaryota(83);			0	0	0	0	0.0106	0.0179	0	0.0057
OTU_311	Bacteria(99);Cyanobacteria(98);Cyanobacteriia(98);Chloroplast(96);Chloroplast_fa(96);Chloroplast_ge(96);	Bacteria~Bacteroidota~Bacteroidia~NS11-12g~UBA8524~SB11~SB11	92	0.1117	0.0545	0	0	0	0	0	0
OTU_312	Bacteria(100);Bacteroidota(100);Bacteroidia(100);Cytophagales(100);Cyclobacteriaceae(100);Belliella(97);	Bacteria~Bacteroidota~Bacteroidia~Cytophagales~Cyclobacteriaceae~Belliella~Belliella	94.688	0	0.0797	0	0	0	0	0	0
OTU_314	Bacteria(89);Bacteria(89);Bacteria(89);Bacteria(89);Bacteria(89);Bacteria(89);	Bacteria~Bacillota~Bacilli~Acholeplasmatales~Anaeroplasmataceae~Anaeroplasma~Anaeroplasma	96.286	0.0045	0.0336	0	0	0	0	0	0.0126
OTU_316	Bacteria(100);Planctomycetota(100);Phycisphaerae(97);Phycisphaerales(97);Phycisphaeraceae(97);Phycisphaeraceae(97);	Bacteria~Planctomycetota~Phycisphaerae~Phycisphaerales~UBA1924~JACVCK01~JACVCK01	98.286	0	0	0	0	0	0	0.124	0
OTU_317	Bacteria(100);Firmicutes(100);Dethiobacteria(100);Dethiobacterales(100);Dethiobacteraceae(100);uncultured(100);	Bacteria~Bacillota_D~Dethiobacteria~Dethiobacterales~Dethiobacteraceae~Dethiobacter~Dethiobacter	93.429	0.0134	0.0042	0	0	0	0	0.2481	0
OTU_32	Bacteria(100);Myxococcota(100);Polyangia(100);Polyangiales(100);Sandaracinaceae(100);Sandaracinus(100);	Bacteria~Myxococcota~Polyangia~Polyangiales~Sandaracinaceae~MED-G138~MED-G138	98.571	0	0	0.5619	0	0	0	0.0345	0
OTU_323	Archaea(100);Halobacterota(100);Methanomicrobia(100);Methanomicrobiales(100);Methanocorpusculaceae(100);Methanocalculus(100);	Archaea~Halobacteriota~Methanomicrobia~Methanomicrobiales~Methanocorpusculaceae~Methanocalculus~Methanocalculus	95.429	0.0313	0	0	0	0	0	0.0758	0
OTU_324	Bacteria(100);Gemmatimonadota(98);BD2-11_terrestrial_group(90);BD2-11_terrestrial_group_or(90);BD2-11_terrestrial_group_fa(90);BD2-11_terrestrial_group_ge(90);	Bacteria~Gemmatimonadota~Gemmatimonadetes~Gemmatimonadales~GWC2-71-9~HRBIN33~HRBIN33	99.714	0.1743	0	0	0	0	0	0	0
OTU_326	Bacteria(100);Verrucomicrobiota(100);Verrucomicrobiae(100);Opitutales(100);Puniceicoccaceae(100);Verruc-01(100);	Bacteria~Verrucomicrobiota~Verrucomicrobiae~Opitutales~Verruco-01~JAFIGG01~JAFIGG01	99.714	0	0	0.005	0	0.0053	0	0	0
OTU_327	Bacteria(100);Desulfobacterota(100);Desulfuromonadia(100);Bradymonadales(100);Bradymonadaceae(100);Bradymonadaceae_ge(100);	Bacteria~Myxococcota~Bradymonadia~Bradymonadales~Bradymonadaceae~Lujinxingia~Lujinxingia	97.714	0.0894	0	0	0.2252	0	0	0.0827	0.0149
OTU_329	Bacteria(100);Deinococcota(100);Deinococci(100);Deinococcales(100);Trueperaceae(100);Truepera(100);	Bacteria~Deinococcota~Deinococci~Deinococcales~Trueperaceae~CSSed10-48~CSSed10-48	92.857	0.0536	0	0	0	0	0	0.0965	0
OTU_33	Bacteria(100);Proteobacteria(100);Alphaproteobacteria(100);Caulobacterales(100);Hyphomonadaceae(100);Oceanicaulis(100);	Bacteria~Pseudomonadota~Alphaproteobacteria~Caulobacterales~Maricaulaceae~Oceanicaulis~Oceanicaulis	87.143	0.0402	0.2392	0.1135	0.9009	4.4843	0.4909	0.2343	0.0011
OTU_332	Bacteria(100);Bacteroidota(100);Bacteroidia(100);Flavobacteriales(100);Flavobacteriaceae(100);Psychroflexus(95);	Bacteria~Bacteroidota~Bacteroidia~Flavobacteriales~Flavobacteriaceae~Psychroflexus~Psychroflexus	93.429	0	0	0	0.6757	0.106	0	0	0
OTU_333	Bacteria(100);Cyanobacteria(100);Cyanobacteriia(100);Cyanobacteriales(100);Nostocaceae(100);Nodularia_PCC-9350(98);	Bacteria~Cyanobacteriota~Cyanobacteriia~Cyanobacteriales~Nostocaceae~Nodularia~Nodularia	96.857	0.0894	0	0	0.2252	0	0	0.1861	0
OTU_334	Bacteria(100);Bacteroidota(100);Bacteroidia(100);Bacteroidales(100);Marinilabiliaceae(100);Alkalitalea(99);	Bacteria~Bacteroidota~Bacteroidia~Bacteroidales~Marinilabiliaceae~Natronoflexus~Natronoflexus	96.571	0.1073	0	0	0.2252	0	0	0.0482	0
OTU_336	Bacteria(100);Cyanobacteria(100);Cyanobacteriia(100);Phormidesmiales(93);Nodosilineaceae(92);Leptolyngbya_PCC-6406(88);	Bacteria~Cyanobacteriota~Cyanobacteriia~Phormidesmiales~Phormidesmiaceae~Nodosilinea~Nodosilinea	91.168	0.0089	0.0671	0	0	0	0	0	0
OTU_337	Bacteria(100);Proteobacteria(100);Gammaproteobacteria(100);Oceanospirillales(98);Saccharospirillaceae(98);Saccharospirillaceae(98);	Bacteria~Pseudomonadota~Gammaproteobacteria~Pseudomonadales~DSM-6294~Venatoribacter~Venatoribacter	95.938	0	0.0545	0	0	0	0	0	0
OTU_34	Bacteria(100);Spirochaetota(100);Spirochaetia(100);Spirochaetales(100);Spirochaetaceae(100);Spirochaetaceae(100);	Bacteria~Spirochaetota~Spirochaetia~DSM-27196~SKKC01~SKKC01~SKKC01	90.625	0.438	0	0.0004	2.9279	0	0.0107	2.0467	1.2598
OTU_340	Bacteria(100);Verrucomicrobiota(100);Verrucomicrobiae(100);Verrucomicrobiales(96);Verrucomicrobiaceae(95);uncultured(90);	Bacteria~Verrucomicrobiota~Verrucomicrobiae~Verrucomicrobiales~Verrucomicrobiaceae~JACKQF01~JACKQF01	83.486	0.0447	0	0	0	0	0	0.0965	0
OTU_342	unknown;unknown(0);unknown(0);unknown(0);unknown(0);unknown(0);	Bacteria~Pseudomonadota~Alphaproteobacteria~Rhodospirillales_A~Thalassospiraceae~Thalassospira~Thalassospira	100	0.0492	0	0	0	0	0	0.0069	0
OTU_346	Bacteria(100);Chloroflexi(100);Chloroflexia(100);Chloroflexales(100);Chloroflexaceae(100);Candidatus_Chloroploca(100);	Bacteria~Chloroflexota~Chloroflexia~Chloroflexales~Chloroflexaceae~Viridilinea~Viridilinea	100	0.067	0	0	0	0	0	0.0069	0
OTU_348	Bacteria(100);Proteobacteria(100);Alphaproteobacteria(100);Sphingomonadales(100);Sphingomonadaceae(100);Altererythrobacter(97);	Bacteria~Pseudomonadota~Alphaproteobacteria~Sphingomonadales~Sphingomonadaceae~Croceibacterium~Croceibacterium	93.201	0.0179	0.0294	0	0	0	0	0.062	0
OTU_35	Bacteria(100);Planctomycetota(100);Phycisphaerae(100);Phycisphaerales(100);Phycisphaeraceae(100);SM1A02(100);	Bacteria~Planctomycetota~Phycisphaerae~Phycisphaerales~UBA1924~SLFH01~SLFH01	91.714	0.0045	0	0.4428	0	0	0.0375	0.0827	0.0275
OTU_351	unknown;unknown(0);unknown(0);unknown(0);unknown(0);unknown(0);	Bacteria~Pseudomonadota~Alphaproteobacteria~Thalassobaculales~Thalassobaculaceae~JANSYS01~JANSYS01	99.714	0	0	0	0	0	0.0214	0	0
OTU_354	Bacteria(100);Proteobacteria(100);Gammaproteobacteria(100);Gammaproteobacteria_Incertae_Sedis(100);Unknown_Family(100);Wenzhouxiangella(100);	Bacteria~Pseudomonadota~Gammaproteobacteria~Xanthomonadales~Wenzhouxiangellaceae~Wenzhouxiangella~Wenzhouxiangella	92.571	0.0045	0	0	0	0.0265	0	0.0345	0.0951
OTU_356	Bacteria(100);Bdellovibrionota(99);Bdellovibrionia(99);Bdellovibrionales(99);Bdellovibrionaceae(99);Bdellovibrio(99);	Bacteria~Bdellovibrionota~Bdellovibrionia~Bdellovibrionales~Bdellovibrionaceae~Bdellovibrio~Bdellovibrio	92	0.0045	0	0.0004	0	0.0371	0.0036	0	0
OTU_358	Bacteria(100);Bacteroidota(100);Rhodothermia(100);Balneolales(100);Balneolaceae(100);uncultured(100);	Bacteria~Bacteroidota~Rhodothermia~Balneolales~Balneolaceae~SW132~SW132	97.391	0.0983	0	0	0	0	0	0	0
OTU_359	Bacteria(100);Gemmatimonadota(99);Longimicrobia(98);Longimicrobiales(98);Longimicrobiaceae(98);Longimicrobiaceae_ge(83);	Bacteria~Gemmatimonadota~Gemmatimonadetes~Longimicrobiales~Longimicrobiaceae~Longimicrobium~Longimicrobium	93.429	0.0849	0	0	0	0	0	0	0
OTU_36	Bacteria(100);Proteobacteria(100);Alphaproteobacteria(100);Rhodobacterales(100);Rhodobacteraceae(100);Yoonia-Loktanella(98);	Bacteria~Pseudomonadota~Alphaproteobacteria~Rhodobacterales~Rhodobacteraceae~Yoonia~Yoonia	91.429	4.5459	0.8098	0	0.2252	0.0742	0.0268	1.4403	0
OTU_365	Bacteria(100);Cyanobacteria(100);Cyanobacteriia(100);Chloroplast(100);Chloroplast_fa(100);Chloroplast_ge(100);			0.0581	0	0	0	0	0	0	0
OTU_366	Bacteria(100);Sumerlaeota(91);Sumerlaeia(91);Sumerlaeales(91);Sumerlaeaceae(91);Sumerlaea(91);	Bacteria~Sumerlaeota~Sumerlaeia~SLMS01~JAHLLQ01~JAHLLQ01~JAHLLQ01	95.442	0	0.0042	0	0	0	0	0	0.0183
OTU_368	Bacteria(100);Bdellovibrionota(100);Bdellovibrionia(100);Bacteriovoracales(100);Bacteriovoracaceae(100);Halobacteriovorax(89);	Bacteria~Bdellovibrionota~Bacteriovoracia~Bacteriovoracales~Bacteriovoracaceae~JACKAK01~JACKAK01	99.714	0.0089	0.0126	0	0	0.1272	0	0	0
OTU_37	Bacteria(100);Bacteroidota(100);Bacteroidia(100);Cytophagales(100);Cyclobacteriaceae(100);Nitritalea(100);	Bacteria~Bacteroidota~Bacteroidia~Cytophagales~Cyclobacteriaceae~Nitritalea~Nitritalea	98.571	0	0	0	0	0	0.7659	0	1.1864
OTU_371	Bacteria(100);Spirochaetota(100);Spirochaetia(100);Spirochaetales(100);Spirochaetaceae(100);Alkalispirochaeta(100);	Bacteria~Spirochaetota~Spirochaetia~DSM-27196~Alkalispirochaetaceae~Alkalispirochaeta~Alkalispirochaeta	92.571	0.0805	0	0	0.9009	0	0	0.0482	0
OTU_373	Bacteria(100);Firmicutes(100);Clostridia(100);Peptostreptococcales-Tissierellales(100);Peptostreptococcales-Tissierellales_fa(97);Alkaliphilus(94);	Bacteria~Bacillota_A~Clostridia~Peptostreptococcales~Natronincolaceae~Alkaliphilus_A~Alkaliphilus_A	92.286	0.0536	0	0	0	0	0	0.1172	0
OTU_374	Bacteria(100);Proteobacteria(100);Gammaproteobacteria(99);Gammaproteobacteria(99);Gammaproteobacteria(99);Gammaproteobacteria(99);	Bacteria~Pseudomonadota~Gammaproteobacteria~Pseudomonadales~Pseudohongiellaceae~Pseudohongiella~Pseudohongiella	90.028	0	0.0587	0	0	0	0	0	0
OTU_375	Bacteria(100);Spirochaetota(88);Spirochaetia(88);Spirochaetales(88);Spirochaetaceae(88);Spirochaetaceae(88);	Bacteria~Spirochaetota~Spirochaetia~DSM-17781~DSM-17781~Spirochaeta_E~Spirochaeta_E	100	0.0447	0.0084	0	0	0	0	0.062	0
OTU_377	Bacteria(100);Actinobacteriota(100);Actinobacteria(100);Nitriliruptorales(100);Nitriliruptoraceae(100);Nitriliruptoraceae(100);	Bacteria~Actinomycetota~Actinomycetia~Nitriliruptorales~Nitriliruptoraceae~Nitriliruptor~Nitriliruptor	95.143	0.0939	0	0	0	0	0	0	0
OTU_378	Bacteria(100);Proteobacteria(100);Alphaproteobacteria(100);Rickettsiales(100);Rickettsiaceae(100);Rickettsiaceae(100);	Bacteria~Pseudomonadota~Alphaproteobacteria~Rickettsiales~Rickettsiaceae~GCA-2402195~GCA-2402195	83.944	0	0	0	0	0	0.0214	0	0
OTU_38	unknown;unknown(0);unknown(0);unknown(0);unknown(0);unknown(0);	Bacteria~Bacillota~Bacilli~Paenibacillales~Paenibacillaceae~Paenibacillus_D~Paenibacillus_D	87.834	6.2042	0	0	0	0	0	0.1447	0
OTU_39	Bacteria(100);Proteobacteria(100);Gammaproteobacteria(100);Gammaproteobacteria(100);Gammaproteobacteria(100);Gammaproteobacteria(100);	Bacteria~Pseudomonadota~Gammaproteobacteria~GCA-2729495~GCA-2729495~SHZI01~SHZI01	90.935	0.0268	0	0.3308	0.2252	0	0.175	0.2274	0.0837
OTU_390	Bacteria(100);Desulfobacterota(98);Desulfuromonadia(98);Bradymonadales(87);Bradymonadales(87);Bradymonadales(87);	Bacteria~Myxococcota~Bradymonadia~Bradymonadales~Bradymonadaceae~Microvenator~Microvenator	98.571	0.0134	0	0	0	0	0	0.062	0
OTU_393	Bacteria(100);Proteobacteria(100);Gammaproteobacteria(100);Legionellales(100);Legionellaceae(100);Legionella(100);	Bacteria~Pseudomonadota~Gammaproteobacteria~Legionellales~Legionellaceae~Legionella_C~Legionella_C	75.974	0	0	0	0	0.0424	0.0161	0	0
OTU_395	Bacteria(100);Firmicutes(100);Clostridia(98);Peptococcales(95);Peptococcaceae(95);uncultured(94);	Bacteria~Bacillota_B~Peptococcia~Peptococcales~Desulfonisporaceae~Desulfonispora~Desulfonispora	96.571	0.0581	0	0	0	0	0	0.0551	0
OTU_396	Bacteria(100);Verrucomicrobiota(100);Verrucomicrobiae(100);Opitutales(100);Opitutales(100);Opitutales(100);	Bacteria~Verrucomicrobiota~Verrucomicrobiae~Opitutales~T3Sed10-336~JAIUMY01~JAIUMY01	90.598	0	0.0042	0.0014	0	0	0.0036	0.0069	0.0023
OTU_397	Bacteria(100);Firmicutes(100);Dethiobacteria(100);Dethiobacterales(100);Dethiobacteraceae(100);uncultured(100);	Bacteria~Bacillota_D~Dethiobacteria~Dethiobacterales~Dethiobacteraceae~Dethiobacter~Dethiobacter	99.429	0.0492	0	0	0	0	0	0.0413	0
OTU_399	Bacteria(100);Firmicutes(100);Clostridia(100);Peptostreptococcales-Tissierellales(100);Peptostreptococcales-Tissierellales_fa(100);Alkaliphilus(100);	Bacteria~Bacillota_A~Clostridia~Peptostreptococcales~Natronincolaceae~Alkaliphilus~Alkaliphilus	94	0.0358	0	0	0	0	0	0.0276	0
OTU_4	Bacteria(100);Cyanobacteria(100);Cyanobacteriia(100);Chloroplast(96);Chloroplast_fa(96);Chloroplast_ge(96);			0	0	10.0605	0.2252	0	0	0	0
OTU_40	unknown;unknown(0);unknown(0);unknown(0);unknown(0);unknown(0);	Bacteria~Actinomycetota~Thermoleophilia~Solirubrobacterales~Thermoleophilaceae~Thermoleophilum~Thermoleophilum	91.714	0	0	0.3926	0	0	0	0	0
OTU_400	Bacteria(100);Bacteroidota(100);Bacteroidia(100);Cytophagales(100);Cyclobacteriaceae(100);Belliella(100);	Bacteria~Bacteroidota~Bacteroidia~Cytophagales~Cyclobacteriaceae~Belliella~Belliella	92.571	0	0.1385	0	0	0	0	0	0
OTU_401	Bacteria(100);Bacteroidota(100);Rhodothermia(100);Balneolales(100);Balneolaceae(100);F1-37X2(100);	Bacteria~Bacteroidota~Rhodothermia~Balneolales~Natronogracilivirgulaceae~SKNL01~SKNL01	92.286	0.0358	0	0	0.4505	0	0	0.0207	0.0011
OTU_402	unknown;unknown(0);unknown(0);unknown(0);unknown(0);unknown(0);	Bacteria~Pseudomonadota~Gammaproteobacteria~Nitrosococcales~Methylophagaceae~GCA-002733105~GCA-002733105	98.857	0.0402	0	0	0	0	0	0.0138	0
OTU_403	Bacteria(100);Bacteria(100);Bacteria(100);Bacteria(100);Bacteria(100);Bacteria(100);	Bacteria~Pseudomonadota~Gammaproteobacteria~Nitrococcales~Nitrococcaceae~Spiribacter~Spiribacter	92.023	0	0	0.021	0	0	0	0	0
OTU_406	Bacteria(100);Bacteria(100);Bacteria(100);Bacteria(100);Bacteria(100);Bacteria(100);	Bacteria~Pseudomonadota~Gammaproteobacteria~Burkholderiales~Burkholderiaceae_B~Tepidimonas~Tepidimonas	93.162	0	0	0	0	0	0	0.062	0
OTU_407	Bacteria(100);Verrucomicrobiota(100);Verrucomicrobiae(100);Chthoniobacterales(98);Chthoniobacterales(98);Chthoniobacterales(98);	Bacteria~Verrucomicrobiota~Verrucomicrobiae~Chthoniobacterales~JACTMZ01~JACTMZ01~JACTMZ01	91.143	0.0536	0.0168	0	0	0	0	0.0689	0
OTU_408	Bacteria(100);Bacteroidota(100);Bacteroidia(100);Bacteroidia(100);Bacteroidia(100);Bacteroidia(100);	Bacteria~Bacteroidota~Bacteroidia~Chitinophagales~JADIYW01~JADIYW01~JADIYW01	97.143	0.0447	0	0	0.2252	0	0	0.0413	0
OTU_409	Bacteria(100);Proteobacteria(100);Gammaproteobacteria(100);Gammaproteobacteria(100);Gammaproteobacteria(100);Gammaproteobacteria(100);	Bacteria~Pseudomonadota~Gammaproteobacteria~Pseudomonadales~Spongiibacteraceae~Spongiibacter~Spongiibacter	97.429	0	0	0.0025	0	0	0.0054	0	0
OTU_41	Bacteria(100);Bacteroidota(100);Bacteroidia(100);Flavobacteriales(100);Crocinitomicaceae(100);uncultured(82);	Bacteria~Bacteroidota~Bacteroidia~Flavobacteriales~Crocinitomicaceae~Brumimicrobium~Brumimicrobium	86.61	0.2995	0.0252	0.1529	0	0.0424	0.7659	0.0138	0.2189
OTU_410	Bacteria(100);Bacteroidota(100);Rhodothermia(100);Balneolales(100);Balneolaceae(100);Balneolaceae(100);	Bacteria~Bacteroidota~Rhodothermia~Balneolales~Cyclonatronaceae~Cyclonatronum~Cyclonatronum	93.143	0	0	0	0	0.0318	0.0143	0.0069	0.0011
OTU_42	Bacteria(100);Bacteroidota(100);Rhodothermia(100);Balneolales(100);Balneolaceae(100);ML310M-34(100);	Bacteria~Bacteroidota~Rhodothermia~Balneolales~Cyclonatronaceae~Cyclonatronum~Cyclonatronum	96	0.0089	0.3986	0.3258	0	0.0265	0	0.0276	0.008
OTU_425	Bacteria(100);Proteobacteria(100);Alphaproteobacteria(100);Rickettsiales(100);Rickettsiaceae(99);Rickettsiaceae(99);	Bacteria~Pseudomonadota~Alphaproteobacteria~Rickettsiales~Rickettsiaceae~Rickettsia~Rickettsia	88.857	0	0	0.0039	0	0	0	0	0
OTU_426	Bacteria(100);Desulfobacterota(100);Desulfobacteria(100);Desulfatiglandales(100);Desulfatiglandaceae(100);Desulfatiglans(100);	Bacteria~Desulfobacterota~DSM-4660~Desulfatiglandales~Desulfatiglandaceae~UBA5623~UBA5623	99.429	0.0179	0	0	0	0	0	0.0207	0
OTU_427	Bacteria(100);Verrucomicrobiota(100);Verrucomicrobiae(100);Verrucomicrobiales(100);Rubritaleaceae(100);Luteolibacter(100);	Bacteria~Verrucomicrobiota~Verrucomicrobiae~Verrucomicrobiales~Akkermansiaceae~Luteolibacter~Luteolibacter	95.702	0.0492	0.0084	0	0	0	0	0.0276	0
OTU_428	Bacteria(100);Bacteroidota(100);Bacteroidia(100);Bacteroidales(100);ML635J-40_aquatic_group(100);ML635J-40_aquatic_group_ge(100);	Bacteria~Bacteroidota~Bacteroidia~Bacteroidales~UBA7960~SKVR01~SKVR01	90.883	0.0492	0.0168	0	0.6757	0	0	0.0689	0
OTU_429	Bacteria(100);Firmicutes(98);Dethiobacteria(92);Dethiobacterales(92);Dethiobacteraceae(92);Dethiobacter(89);	Bacteria~Bacillota_D~Dethiobacteria~Dethiobacterales~Dethiobacteraceae~Dethiobacter~Dethiobacter	97.143	0.0581	0	0	0	0	0	0	0
OTU_43	Bacteria(89);Proteobacteria(86);Alphaproteobacteria(86);Rickettsiales(85);Mitochondria(85);Mitochondria_ge(85);	Bacteria~Pseudomonadota~Alphaproteobacteria~Rhodospirillales~Rhodospirillaceae~JADFXL01~JADFXL01	93.948	0	0	0	0	0	0	0	1.6575
OTU_436	Bacteria(100);Proteobacteria(88);Alphaproteobacteria(87);Alphaproteobacteria(87);Alphaproteobacteria(87);Alphaproteobacteria(87);	Bacteria~Pseudomonadota~Alphaproteobacteria~Rickettsiales~UBA998~RDZH01~RDZH01	94.886	0	0	0.0025	0	0	0	0	0
OTU_439	Bacteria(100);Verrucomicrobiota(100);Verrucomicrobiae(100);Opitutales(100);Puniceicoccaceae(97);Puniceicoccaceae(97);	Bacteria~Verrucomicrobiota~Verrucomicrobiae~Opitutales~T3Sed10-336~JAIUMY01~JAIUMY01	92.593	0	0	0.0004	0	0	0.0161	0	0
OTU_44	Bacteria(92);Proteobacteria(80);Proteobacteria(80);Proteobacteria(80);Proteobacteria(80);Proteobacteria(80);	Bacteria~Pseudomonadota~Gammaproteobacteria~Nitrosococcales~Methylophagaceae~GCA-002733105~GCA-002733105	89.914	2.8071	1.4686	0	0	0	0	0.1654	0
OTU_440	Bacteria(100);Bacteroidota(100);Bacteroidia(100);Cytophagales(100);Cyclobacteriaceae(100);Indibacter(100);	Bacteria~Bacteroidota~Bacteroidia~Cytophagales~Cyclobacteriaceae~Arthrospiribacter~Arthrospiribacter	90	0	0	0	0	0	0.0321	0	0
OTU_441	Bacteria(100);Proteobacteria(100);Alphaproteobacteria(100);Rhizobiales(100);Beijerinckiaceae(96);Beijerinckiaceae(96);	Bacteria~Pseudomonadota~Alphaproteobacteria~Rhizobiales~Xanthobacteraceae~Rhodoplanes~Rhodoplanes	89.143	0.0223	0	0	0	0	0	0.0207	0
OTU_442	Bacteria(100);Verrucomicrobiota(100);Verrucomicrobiae(100);Verrucomicrobiales(100);Verrucomicrobiaceae(96);uncultured(96);	Bacteria~Verrucomicrobiota~Verrucomicrobiae~Verrucomicrobiales~SLCJ01~Sulfuriroseicoccus~Sulfuriroseicoccus	92	0.0089	0	0	0	0	0	0.0482	0
OTU_443	Bacteria(100);Planctomycetota(100);Phycisphaerae(100);Phycisphaerales(100);Phycisphaeraceae(100);SM1A02(100);	Bacteria~Planctomycetota~Phycisphaerae~Phycisphaerales~UBA1924~JAHBXL01~JAHBXL01	97.03	0	0	0	0.2252	0	0	0.0758	0
OTU_444	Bacteria(100);Proteobacteria(100);Gammaproteobacteria(100);Thiotrichales(83);Thiotrichaceae(83);Thiothrix(83);	Bacteria~Pseudomonadota~Gammaproteobacteria~Thiotrichales~Thiotrichaceae~Thiolinea~Thiolinea	91.453	0.0447	0	0	0	0	0	0	0
OTU_445	Bacteria(100);Proteobacteria(100);Alphaproteobacteria(100);Tistrellales(100);Geminicoccaceae(100);uncultured(99);	Bacteria~Pseudomonadota~Alphaproteobacteria~Geminicoccales~Geminicoccaceae~SLRI01~SLRI01	95.05	0.0536	0	0	0	0	0	0.0827	0.0011
OTU_449	Bacteria(100);Proteobacteria(100);Gammaproteobacteria(100);Burkholderiales(100);Comamonadaceae(96);Comamonadaceae(96);	Bacteria~Pseudomonadota~Gammaproteobacteria~Burkholderiales~Burkholderiaceae_B~Ideonella~Ideonella	98.857	0.0045	0	0	0	0	0	0.0689	0
OTU_45	Bacteria(100);Bacteroidota(100);Bacteroidia(100);Cytophagales(100);Cyclobacteriaceae(100);Cyclobacteriaceae_ge(100);	Bacteria~Bacteroidota~Bacteroidia~Cytophagales~Cyclobacteriaceae~Mongoliibacter~Mongoliibacter	92.045	0	0.2769	0.0021	0	3.6627	0.6605	0.0276	0
OTU_450	Bacteria(100);Verrucomicrobiota(100);Verrucomicrobiae(100);Opitutales(100);Opitutales(100);Opitutales(100);	Bacteria~Verrucomicrobiota~Verrucomicrobiae~Opitutales~Opitutaceae~Ereboglobus~Ereboglobus	98.286	0.0223	0	0	0	0	0	0.1103	0
OTU_451	Bacteria(100);Bacteroidota(100);Bacteroidia(100);Flavobacteriales(100);Flavobacteriaceae(100);Flavobacteriaceae(100);	Bacteria~Bacteroidota~Bacteroidia~Flavobacteriales~Flavobacteriaceae~Flavobacterium~Flavobacterium	90.286	0	0.0462	0	0	0	0	0	0
OTU_452	Bacteria(100);Spirochaetota(100);Spirochaetia(100);Spirochaetales(100);Spirochaetaceae(100);Spirochaetaceae(100);	Bacteria~Spirochaetota~Spirochaetia~DSM-27196~SKKC01~SKKC01~SKKC01	99.714	0.1252	0	0	0	0	0	0.2274	0
OTU_454	Bacteria(100);Cyanobacteria(99);Cyanobacteriia(99);Chloroplast(97);Chloroplast_fa(97);Chloroplast_ge(97);	Bacteria~Cyanobacteriota~Cyanobacteriia~Elainellales~Elainellaceae~JAAUTN01~JAAUTN01	91.667	0.0581	0	0	0	0	0	0	0
OTU_455	Bacteria(100);Proteobacteria(100);Alphaproteobacteria(100);Rhodobacterales(100);Rhodobacteraceae(100);Rhodobaca(87);	Bacteria~Pseudomonadota~Alphaproteobacteria~Rhodobacterales~Rhodobacteraceae~Roseinatronobacter~Roseinatronobacter	99.714	0.0179	0.021	0.0064	0	0.0742	0.0107	0.0207	0.0046
OTU_457	Bacteria(100);Bacteria(100);Bacteria(100);Bacteria(100);Bacteria(100);Bacteria(100);	Bacteria~Myxococcota~Bradymonadia~REDH01~REDH01~REDH01~REDH01	93.064	0.0179	0	0.0004	0.2252	0	0	0.0413	0.0413
OTU_458	Bacteria(100);Bacteroidota(100);Rhodothermia(100);Balneolales(100);Balneolaceae(100);uncultured(91);	Bacteria~Bacteroidota~Rhodothermia~Balneolales~Balneolaceae~SW132~SW132	98.857	0	0	0	0	0	0	0.0758	0
OTU_459	Bacteria(100);Proteobacteria(100);Gammaproteobacteria(100);Gammaproteobacteria(100);Gammaproteobacteria(100);Gammaproteobacteria(100);	Bacteria~Pseudomonadota~Gammaproteobacteria~Nitrococcales~Halorhodospiraceae~Alkalilimnicola~Alkalilimnicola	89.174	0	0	0	0	0	0	0.0689	0
OTU_46	Bacteria(100);Bacteria(100);Bacteria(100);Bacteria(100);Bacteria(100);Bacteria(100);	Bacteria~Myxococcota~Bradymonadia~REDH01~REDH01~REDH01~REDH01	89.941	0.0089	0.0042	0.2678	0	0	0.0179	0.0276	0
OTU_460	Bacteria(100);Deinococcota(100);Deinococci(100);Deinococcales(100);Trueperaceae(100);Truepera(100);	Bacteria~Deinococcota~Deinococci~Deinococcales~Trueperaceae~JAABTL01~JAABTL01	99.429	0.067	0	0.0004	0	0	0	0.0207	0
OTU_464	Bacteria(100);Planctomycetota(100);Phycisphaerae(100);Phycisphaerales(100);Phycisphaeraceae(100);Urania-1B-19_marine_sediment_group(81);	Bacteria~Planctomycetota~Phycisphaerae~Phycisphaerales~SM1A02~JADFKZ01~JADFKZ01	93.714	0.0045	0	0	0	0	0	0.1103	0
OTU_467	Bacteria(100);Bacteroidota(100);Bacteroidia(100);Cytophagales(99);Cyclobacteriaceae(99);Cyclobacteriaceae(99);	Bacteria~Bacteroidota~Bacteroidia~Cytophagales~MED-G16~MED-G16~MED-G16	89.266	0	0	0.0039	0	0	0	0	0
OTU_468	Bacteria(100);Planctomycetota(100);Planctomycetes(100);Pirellulales(100);Pirellulaceae(100);Rhodopirellula(81);	Bacteria~Planctomycetota~Planctomycetia~Pirellulales~Pirellulaceae~Rhodopirellula~Rhodopirellula	99.429	0.0045	0	0.0018	0	0	0	0.0207	0
OTU_469	Eukaryota(89);Eukaryota(89);Eukaryota(89);Eukaryota(89);Eukaryota(89);Eukaryota(89);			0	0	0.0036	0	0	0	0	0
OTU_47	Bacteria(100);Cyanobacteria(90);Cyanobacteriia(90);Cyanobacteriia(90);Cyanobacteriia(90);Cyanobacteriia(90);	Bacteria~Bacteroidota~Bacteroidia~Flavobacteriales~Schleiferiaceae~UBA10364~UBA10364	92.286	3.7949	0	0	0	0	0	1.0613	0
OTU_470	Bacteria(100);Actinobacteriota(100);Actinobacteria(100);Euzebyales(100);Euzebyaceae(100);uncultured(98);	Bacteria~Actinomycetota~Actinomycetia~Euzebyales~Euzebyaceae~Euzebya~Euzebya	93.696	0.0268	0	0	0	0	0	0.0069	0
OTU_472	Bacteria(100);Spirochaetota(100);Spirochaetia(100);Spirochaetales(100);Spirochaetaceae(100);Spirochaetaceae(100);	Bacteria~Spirochaetota~Spirochaetia~DSM-27196~Salinispiraceae~Spirochaeta_D~Spirochaeta_D	89.565	0.0268	0	0	0	0	0	0	0
OTU_48	Bacteria(100);Firmicutes(100);Bacilli(100);Bacillales(100);Salisediminibacteriaceae(100);Alkalicoccus(95);	Bacteria~Bacillota~Bacilli~Bacillales_H~Salisediminibacteriaceae~Salipaludibacillus~Salipaludibacillus	94.034	4.8275	0.0042	0	0.6757	0.0053	0	0.3515	0.0103
OTU_480	Bacteria(100);Verrucomicrobiota(100);Verrucomicrobiae(100);Verrucomicrobiales(100);Verrucomicrobiales(100);Verrucomicrobiales(100);	Bacteria~Verrucomicrobiota~Verrucomicrobiae~Verrucomicrobiales~SLCJ01~Sulfuriroseicoccus~Sulfuriroseicoccus	98.571	0.0045	0	0	0	0	0	0.0896	0
OTU_482	Bacteria(100);Planctomycetota(100);Planctomycetes(100);Pirellulales(100);Pirellulaceae(100);Pirellulaceae(100);	Bacteria~Planctomycetota~Planctomycetia~Pirellulales~Pirellulaceae~SKKK01~SKKK01	96	0.0581	0	0	0	0	0	0.0069	0
OTU_483	Bacteria(100);Proteobacteria(100);Alphaproteobacteria(100);Rhizobiales(100);Beijerinckiaceae(100);Salinarimonas(100);	Bacteria~Pseudomonadota~Alphaproteobacteria~Rhizobiales~Beijerinckiaceae~Saliniramus~Saliniramus	92.898	0.0089	0	0.0046	0	0.0265	0.0071	0	0.0023
OTU_485	Bacteria(100);Proteobacteria(100);Gammaproteobacteria(100);Alteromonadales(100);Idiomarinaceae(100);Aliidiomarina(92);	Bacteria~Pseudomonadota~Gammaproteobacteria~Enterobacterales_A~Alteromonadaceae~Aliidiomarina~Aliidiomarina	92.529	0.2593	0.1301	0.0011	0	0.0583	0	0.0413	0
OTU_488	Bacteria(100);Proteobacteria(100);Gammaproteobacteria(100);Gammaproteobacteria(100);Gammaproteobacteria(100);Gammaproteobacteria(100);	Bacteria~Pseudomonadota~Gammaproteobacteria~GCA-2729495~GCA-2729495~QUBU01~QUBU01	92.877	0	0	0.0011	0	0	0	0.0758	0
OTU_489	Bacteria(100);Bacteroidota(100);Bacteroidia(100);Cytophagales(100);Cyclobacteriaceae(89);Cyclobacteriaceae(89);	Bacteria~Bacteroidota~Bacteroidia~Cytophagales~Cyclobacteriaceae~Marinoscillum~Marinoscillum	98	0	0	0.0032	0	0	0	0.0069	0
OTU_49	Bacteria(100);Bacteroidota(100);Bacteroidia(100);Bacteroidia(100);Bacteroidia(100);Bacteroidia(100);	Bacteria~Bacteroidota~Bacteroidia~Flavobacteriales~Schleiferiaceae~Phaeocystidibacter~Phaeocystidibacter	93.478	0.0089	0.0587	0.0459	0	0.0689	0.2999	0.0069	0.5078
OTU_491	Bacteria(100);Firmicutes(99);Firmicutes(99);Firmicutes(99);Firmicutes(99);Firmicutes(99);	Bacteria~Bacillota_A~Clostridia~Tissierellales~Sporanaerobacteraceae~Anaerosalibacter_A~Anaerosalibacter_A	87.429	0.0268	0	0	0	0	0	0	0
OTU_492	Bacteria(100);Proteobacteria(100);Gammaproteobacteria(100);Nitrosococcales(100);Methylophagaceae(100);Methylophaga(100);	Bacteria~Pseudomonadota~Gammaproteobacteria~Nitrosococcales~Methylophagaceae~Methylophaga~Methylophaga	99.143	0.0179	1.0196	0.6985	0	0.1484	0.0196	0.0069	0
OTU_494	Bacteria(100);Proteobacteria(100);Alphaproteobacteria(100);Micavibrionales(100);Micavibrionaceae(98);uncultured(98);	Bacteria~Pseudomonadota~Alphaproteobacteria~Micavibrionales~Micavibrionaceae~UM-FILTER-47-13~UM-FILTER-47-13	91.785	0	0	0	0.2252	0	0	0.0413	0
OTU_5	Bacteria(100);Proteobacteria(100);Gammaproteobacteria(100);Gammaproteobacteria_Incertae_Sedis(100);Unknown_Family(100);Wenzhouxiangella(100);	Bacteria~Pseudomonadota~Gammaproteobacteria~Xanthomonadales~Wenzhouxiangellaceae~Wenzhouxiangella~Wenzhouxiangella	98.286	0.8135	0.3063	0	5.4054	8.4756	0.216	6.1815	28.3477
OTU_50	Bacteria(100);Verrucomicrobiota(100);Verrucomicrobiae(100);Verrucomicrobiales(100);Rubritaleaceae(100);Luteolibacter(99);	Bacteria~Verrucomicrobiota~Verrucomicrobiae~Verrucomicrobiales~Akkermansiaceae~Luteolibacter~Luteolibacter	96.571	0.1564	0.0671	0.0004	0	11.746	0	0.7443	0
OTU_503	Eukaryota(100);Diatomea(100);Bacillariophyceae(100);Bacillariophyceae_or(100);Bacillariophyceae_fa(100);Bacillariophyceae_fa(100);	Bacteria~Bacteroidota~Bacteroidia~Chitinophagales~Chitinophagaceae~Agriterribacter~Agriterribacter	96.011	0	0.0378	0	0	0	0	0.0069	0
OTU_506	Bacteria(98);Proteobacteria(97);Alphaproteobacteria(84);Rickettsiales(83);Mitochondria(83);Mitochondria_ge(83);	Bacteria~Pseudomonadota~Gammaproteobacteria~Nitrosococcales~Methylophagaceae~GCA-002733105~GCA-002733105	98.286	0	0	0	0	0	0	0.0413	0
OTU_51	Bacteria(100);Spirochaetota(100);Spirochaetia(100);Spirochaetales(100);Spirochaetaceae(100);Salinispira(100);	Bacteria~Spirochaetota~Spirochaetia~DSM-27196~Salinispiraceae~Spirochaeta_D~Spirochaeta_D	97.143	0.0447	0.172	0.1174	0	0.0318	0.5499	0	0.0459
OTU_510	Bacteria(100);Bacteroidota(100);Rhodothermia(100);Balneolales(100);Balneolaceae(100);Balneolaceae(100);	Bacteria~Bacteroidota~Rhodothermia~Balneolales~Natronogracilivirgulaceae~Natronogracilivirgula~Natronogracilivirgula	91.562	0.0358	0	0	0	0	0	0	0
OTU_512	Bacteria(100);Planctomycetota(100);Planctomycetes(100);Isosphaerales(100);Isosphaeraceae(100);uncultured(100);	Bacteria~Planctomycetota~Planctomycetia~Isosphaerales~Isosphaeraceae~Tautonia~Tautonia	91.429	0	0	0.0018	0	0	0	0.0276	0
OTU_513	unknown;unknown(0);unknown(0);unknown(0);unknown(0);unknown(0);	Bacteria~Desulfobacterota_D~UBA1144~RKRQ01~RKRQ01~RKRQ01~RKRQ01	99.143	0	0	0	0	0	0.025	0	0
OTU_514	Bacteria(100);Desulfobacterota(100);Syntrophobacteria(100);Syntrophobacterales(100);Syntrophobacteraceae(100);Syntrophobacteraceae(100);	Bacteria~Desulfobacterota~Syntrophobacteria~Syntrophobacterales~Syntrophobacteraceae~Syntrophobacter~Syntrophobacter	90	0.0223	0	0	0	0	0	0.0276	0
OTU_52	Bacteria(100);Proteobacteria(100);Gammaproteobacteria(100);Oceanospirillales(100);Nitrincolaceae(100);Nitrincola(99);	Bacteria~Pseudomonadota~Gammaproteobacteria~Pseudomonadales~Nitrincolaceae~Nitrincola~Nitrincola	95.714	2.1858	4.8588	0	0	0.0477	0	0.4342	0
OTU_520	Bacteria(100);Verrucomicrobiota(99);Kiritimatiellae(99);WCHB1-41(95);WCHB1-41_fa(95);WCHB1-41_ge(95);	Bacteria~Verrucomicrobiota~Kiritimatiellia~LD1-PB3_A~JAGNIJ01~JAGNIJ01~JAGNIJ01	94.099	0.0447	0.0042	0	0	0	0	0	0
OTU_522	unknown;unknown(0);unknown(0);unknown(0);unknown(0);unknown(0);			0	0	0	0	0	0	0.0413	0
OTU_523	Bacteria(100);Desulfobacterota(100);Desulfovibrionia(100);Desulfovibrionales(100);Desulfonatronaceae(100);Desulfonatronum(100);	Bacteria~Desulfobacterota~Desulfovibrionia~Desulfovibrionales~Desulfonatronaceae~Desulfonatronum~Desulfonatronum	89.398	0.0223	0	0	0	0	0	0.1034	0
OTU_525	Bacteria(100);Planctomycetota(100);Phycisphaerae(100);Phycisphaerales(100);Phycisphaeraceae(100);Urania-1B-19_marine_sediment_group(91);	Bacteria~Planctomycetota~Phycisphaerae~Phycisphaerales~SM1A02~JAHBWZ01~JAHBWZ01	96	0	0	0	0	0	0	0.0827	0
OTU_526	Bacteria(100);Bdellovibrionota(97);Bdellovibrionia(97);Bdellovibrionales(97);Bdellovibrionaceae(97);Bdellovibrio(97);	Bacteria~Bdellovibrionota~Bdellovibrionia~Bdellovibrionales~JAGQZY01~JACKAL01~JACKAL01	90.341	0	0	0	0	0.053	0.0018	0.0069	0
OTU_527	Bacteria(100);Verrucomicrobiota(100);Verrucomicrobiae(100);Chthoniobacterales(99);uncultured(97);uncultured_ge(97);	Bacteria~Acidobacteriota~Blastocatellia~Pyrinomonadales~Pyrinomonadaceae~PSRF01~PSRF01	84.821	0	0	0	0	0	0	0.0413	0
OTU_53	Bacteria(100);Proteobacteria(100);Gammaproteobacteria(100);Alteromonadales(100);Idiomarinaceae(100);Aliidiomarina(100);	Bacteria~Pseudomonadota~Gammaproteobacteria~Enterobacterales_A~Alteromonadaceae~Aliidiomarina~Aliidiomarina	95.429	3.1244	1.0238	0.0018	0.2252	0.212	0	0.1723	0
OTU_533	Bacteria(100);Firmicutes(100);Clostridia(99);Peptococcales(99);Peptococcaceae(99);Desulfitispora(96);	Bacteria~Bacillota_B~Desulfitobacteriia~Desulfitobacteriales~Syntrophobotulaceae~Gracilibacter~Gracilibacter	90.164	0.0268	0	0	0	0	0	0	0
OTU_535	Bacteria(100);Bacteroidota(100);Bacteroidia(100);Cytophagales(100);Amoebophilaceae(100);Candidatus_Amoebophilus(100);	Bacteria~Bacteroidota~Bacteroidia~Cytophagales~Amoebophilaceae~Amoebophilus~Amoebophilus	91.954	0.0134	0.0126	0	0	0	0	0	0
OTU_537	Bacteria(100);Proteobacteria(100);Gammaproteobacteria(100);Ectothiorhodospirales(99);Ectothiorhodospiraceae(99);Ectothiorhodospiraceae(99);	Bacteria~Pseudomonadota~Gammaproteobacteria~Ectothiorhodospirales~Ectothiorhodospiraceae~Thioalkalivibrio_A~Thioalkalivibrio_A	90	0.0268	0	0	0	0	0	0.0345	0
OTU_538	Bacteria(100);Bacteroidota(100);Bacteroidia(100);Chitinophagales(99);Saprospiraceae(99);uncultured(99);	Bacteria~Bacteroidota~Bacteroidia~Chitinophagales~Saprospiraceae~OLB9~OLB9	99.429	0.0983	0	0	0	0	0	0	0
OTU_54	Bacteria(100);Bacteroidota(100);Bacteroidia(100);Flavobacteriales(99);Cryomorphaceae(99);Owenweeksia(81);	Bacteria~Bacteroidota~Bacteroidia~Flavobacteriales~Schleiferiaceae~Owenweeksia~Owenweeksia	96.286	0	0.3147	0.1746	0	0.0159	0.0143	0	0
OTU_543	Bacteria(100);Proteobacteria(100);Gammaproteobacteria(100);Xanthomonadales(92);Xanthomonadales(92);Xanthomonadales(92);	Bacteria~Pseudomonadota~Gammaproteobacteria~Xanthomonadales~Xanthomonadaceae~Rehaibacterium~Rehaibacterium	93.714	0	0	0.016	0	0	0	0	0
OTU_547	Bacteria(97);Bacteria(97);Bacteria(97);Bacteria(97);Bacteria(97);Bacteria(97);	Bacteria~Armatimonadota~Fimbriimonadia~Fimbriimonadales~Fimbriimonadaceae~UphvI-Ar2~UphvI-Ar2	95.349	0	0	0.0043	0	0	0	0	0.0011
OTU_549	Bacteria(100);Proteobacteria(100);Alphaproteobacteria(100);Rhodobacterales(100);Rhodobacteraceae(100);Rubribacterium(93);	Bacteria~Pseudomonadota~Alphaproteobacteria~Rhodobacterales~Rhodobacteraceae~Rubrimonas~Rubrimonas	96.286	0.0223	0	0	0	0	0	0.0551	0.0034
OTU_55	Bacteria(100);Proteobacteria(100);Gammaproteobacteria(100);Gammaproteobacteria(100);Gammaproteobacteria(100);Gammaproteobacteria(100);	Bacteria~Pseudomonadota~Gammaproteobacteria~Pseudomonadales~Pseudomonadaceae~Halopseudomonas~Halopseudomonas	95.714	2.6417	0.7595	0	0.4505	0.0106	0	0.4755	0.0023
OTU_551	Bacteria(100);Cyanobacteria(100);Cyanobacteriia(100);Cyanobacteriales(100);Paraspirulinaceae(100);Spirulina_PCC-6313(100);	Bacteria~Cyanobacteriota~Cyanobacteriia~Cyanobacteriales~Spirulinaceae~Spirulina~Spirulina	91.691	0.0089	0.0965	0	0	0	0	0	0
OTU_553	Bacteria(98);Verrucomicrobiota(86);Verrucomicrobiota(86);Verrucomicrobiota(86);Verrucomicrobiota(86);Verrucomicrobiota(86);	Bacteria~Verrucomicrobiota~Kiritimatiellia~LD1-PB3_A~JAGNIJ01~JAGNIJ01~JAGNIJ01	91.143	0.0045	0.021	0	0.2252	0	0	0.0551	0.0011
OTU_557	Bacteria(100);Verrucomicrobiota(100);Verrucomicrobiae(100);Opitutales(100);uncultured(100);uncultured_ge(100);	Bacteria~Verrucomicrobiota~Verrucomicrobiae~Opitutales~T3Sed10-336~JAIUMY01~JAIUMY01	87.042	0.0134	0	0	0	0	0	0.0345	0
OTU_558	Bacteria(100);Hydrogenedentes(100);Hydrogenedentia(100);Hydrogenedentiales(100);Hydrogenedensaceae(100);Hydrogenedensaceae_ge(100);	Bacteria~Hydrogenedentota~Hydrogenedentia~Hydrogenedentiales~WGMK01~WGMK01~WGMK01	90.909	0	0	0.0032	0	0	0	0	0
OTU_559	Bacteria(100);Bacteria(100);Bacteria(100);Bacteria(100);Bacteria(100);Bacteria(100);	Bacteria~Bdellovibrionota~Bdellovibrionia~Bdellovibrionales~SG-bin7~SG-bin7~SG-bin7	98.857	0	0	0	0	0.0371	0.0018	0.0069	0
OTU_56	Bacteria(100);Bacteroidota(100);Bacteroidia(100);Sphingobacteriales(92);NS11-12_marine_group(90);NS11-12_marine_group_ge(90);	Bacteria~Bacteroidota~Bacteroidia~NS11-12g~UBA955~JALOAG01~JALOAG01	96.286	0.0045	0	0.1985	0	0	0	0	0
OTU_564	Bacteria(100);Proteobacteria(100);Gammaproteobacteria(100);Cellvibrionales(100);Cellvibrionaceae(100);Marinimicrobium(100);	Bacteria~Pseudomonadota~Gammaproteobacteria~Pseudomonadales~Cellvibrionaceae~Marinimicrobium_A~Marinimicrobium_A	92.593	0	0.0336	0	0	0	0	0.0069	0
OTU_565	Bacteria(100);Proteobacteria(100);Gammaproteobacteria(100);Chromatiales(98);Chromatiaceae(98);Chromatiaceae(98);	Bacteria~Pseudomonadota~Gammaproteobacteria~Chromatiales~Chromatiaceae~Thiohalocapsa~Thiohalocapsa	100	0.0626	0	0	0	0	0	0.0069	0
OTU_568	Bacteria(100);Bacteroidota(100);Bacteroidia(100);Bacteroidales(100);ML635J-40_aquatic_group(100);ML635J-40_aquatic_group_ge(100);	Bacteria~Chloroflexota~Chloroflexia~Chloroflexales~Chloroflexaceae~Chloroploca~Chloroploca	98.86	0.143	0	0	0	0	0	0.0276	0
OTU_569	Bacteria(100);Proteobacteria(100);Gammaproteobacteria(100);Oceanospirillales(100);Alcanivoracaceae1(82);Alcanivorax(82);	Bacteria~Pseudomonadota~Gammaproteobacteria~Pseudomonadales~Alcanivoracaceae~Alcanivorax_A~Alcanivorax_A	89.744	0.0089	0.0042	0	0	0	0	0.0207	0
OTU_57	Bacteria(100);Bacteroidota(100);Bacteroidia(100);Chitinophagales(100);Saprospiraceae(100);uncultured(94);	Bacteria~Bacteroidota~Bacteroidia~Chitinophagales~Saprospiraceae~JABDMH01~JABDMH01	98.571	0.6705	0	0.1423	1.3514	0.3922	0	0.5858	0
OTU_571	Bacteria(100);Firmicutes(100);Clostridia(100);Caldicoprobacterales(99);Caldicoprobacteraceae(99);Caldicoprobacter(99);	Bacteria~Bacillota_A~Clostridia~Christensenellales~GCA-900066905~Luoshenia~Luoshenia	96.857	0.0983	0	0	0	0	0	0.0069	0
OTU_573	Bacteria(100);Desulfobacterota(100);Desulfuromonadia(100);Bradymonadales(100);Bradymonadaceae(100);Bradymonadaceae_ge(100);	Bacteria~Myxococcota~Bradymonadia~Bradymonadales~Bradymonadaceae~Lujinxingia~Lujinxingia	97.706	0.0715	0	0	0	0	0	0.0345	0
OTU_575	Bacteria(100);Bacteroidota(100);Rhodothermia(100);Balneolales(100);Balneolaceae(100);ML310M-34(95);	Bacteria~Bacteroidota~Rhodothermia~Balneolales~Cyclonatronaceae~Cyclonatronum~Cyclonatronum	95.714	0.0313	0	0	0	0	0	0.0276	0.0011
OTU_576	Bacteria(100);Bdellovibrionota(100);Oligoflexia(100);Oligoflexales(100);uncultured(85);uncultured_ge(85);	Bacteria~Bdellovibrionota~Oligoflexia~Oligoflexales~Oligoflexaceae~Pseudobacteriovorax~Pseudobacteriovorax	97.429	0.0223	0	0	0	0	0	0.0413	0
OTU_577	Bacteria(100);Planctomycetota(100);Phycisphaerae(100);Phycisphaerales(100);Phycisphaeraceae(100);SM1A02(100);	Bacteria~Planctomycetota~Phycisphaerae~Phycisphaerales~UBA1924~SLFH01~SLFH01	95.429	0	0	0	0	0	0	0.0345	0
OTU_58	Bacteria(100);Bacteroidota(100);Bacteroidia(100);Cytophagales(99);Cyclobacteriaceae(92);Cyclobacteriaceae(92);	Bacteria~Bacteroidota~Bacteroidia~Cytophagales~Cyclobacteriaceae~JAFIEV01~JAFIEV01	93.714	0	0	0.1536	0	0.0053	0.0196	0	0
OTU_59	Bacteria(100);Planctomycetota(98);Phycisphaerae(98);Phycisphaerales(98);Phycisphaeraceae(98);SM1A02(98);	Bacteria~Planctomycetota~Phycisphaerae~Phycisphaerales~UBA1924~UBA6054~UBA6054	96.857	0	0	0.1533	0	0	0.0411	0.0138	0
OTU_590	Bacteria(100);Chloroflexi(91);Anaerolineae(90);SBR1031(87);A4b(87);A4b_ge(84);	Bacteria~Chloroflexota~Anaerolineae~Aggregatilineales~Phototrophicaceae~Phototrophicus~Phototrophicus	92.571	0	0	0.0092	0	0	0	0	0
OTU_596	Bacteria(100);Bacteroidota(100);Bacteroidia(100);Bacteroidia(100);Bacteroidia(100);Bacteroidia(100);	Bacteria~Bacteroidota~Bacteroidia~AKYH767~2-12-FULL-35-15~2-12-FULL-35-15~2-12-FULL-35-15	96.286	0	0	0.0014	0	0	0	0	0
OTU_598	Bacteria(100);Cyanobacteria(100);Cyanobacteriia(100);Cyanobacteriales(100);Cyanobacteriaceae(100);Cyanobacterium_PCC-7202(100);	Bacteria~Cyanobacteriota~Cyanobacteriia~Cyanobacteriales~Cyanobacteriaceae~Cyanobacterium~Cyanobacterium	100	0	0	0.0057	0	0	0	0	0
OTU_599	Bacteria(100);Verrucomicrobiota(98);Kiritimatiellae(95);WCHB1-41(95);WCHB1-41_fa(95);WCHB1-41_ge(95);	Bacteria~Verrucomicrobiota~Kiritimatiellia~UBA8416~VGWJ01~VGWJ01~VGWJ01	92.286	0.0223	0.0294	0	0	0	0	0.0345	0
OTU_6	Bacteria(100);Proteobacteria(100);Alphaproteobacteria(100);Rhodobacterales(100);Rhodobacteraceae(100);Rhodobaca(84);	Bacteria~Pseudomonadota~Alphaproteobacteria~Rhodobacterales~Rhodobacteraceae~Roseinatronobacter~Roseinatronobacter	98	7.4736	9.0043	3.2255	20.4955	44.0634	2.66	21.3286	5.9504
OTU_60	Bacteria(100);Cyanobacteria(100);Cyanobacteriia(100);Synechococcales(100);Cyanobiaceae(100);Cyanobiaceae(100);	Bacteria~Cyanobacteriota~Cyanobacteriia~PCC-6307~Cyanobiaceae~NIES-981~NIES-981	85.593	0.4559	0	0	0.4505	0	0	2.7565	0
OTU_600	unknown;unknown(0);unknown(0);unknown(0);unknown(0);unknown(0);			0	0	0	0	0	0.0107	0	0.0034
OTU_602	Bacteria(99);Cyanobacteria(99);Cyanobacteriia(99);Cyanobacteriales(99);Cyanobacteriaceae(99);Cyanobacterium_PCC-7202(99);	Bacteria~Cyanobacteriota~Cyanobacteriia~Cyanobacteriales~Cyanobacteriaceae~Cyanobacterium~Cyanobacterium	94.571	0	0	0.0032	0	0	0	0	0
OTU_61	Bacteria(100);Proteobacteria(100);Gammaproteobacteria(100);Gammaproteobacteria(100);Gammaproteobacteria(100);Gammaproteobacteria(100);	Bacteria~Pseudomonadota~Gammaproteobacteria~Chromatiales~Chromatiaceae~Thiohalocapsa~Thiohalocapsa	92.529	0.1833	0.0084	0	11.036	0	0	0.9441	0.1937
OTU_611	Bacteria(100);Desulfobacterota(100);Desulfuromonadia(100);Desulfuromonadia_or(99);Geopsychrobacteraceae(99);Geopsychrobacteraceae(99);	Bacteria~Desulfobacterota_F~Desulfuromonadia~Desulfuromonadales~Geopsychrobacteraceae~Pelovirga~Pelovirga	100	0.0313	0	0	0	0	0	0.0207	0
OTU_612	Bacteria(100);Desulfobacterota(86);Desulfobacterota(86);Desulfobacterota(86);Desulfobacterota(86);Desulfobacterota(86);	Bacteria~Desulfobacterota_E~Anaeroferrophillalia~Anaeroferrophillales~Anaeroferrophillaceae~DQWO01~DQWO01	99.143	0.0179	0	0	0	0	0	0	0
OTU_617	Bacteria(100);Firmicutes(100);Bacilli(100);Desulfuribacillales(100);Desulfuribacillaceae(100);Desulfuribacillus(100);	Bacteria~Bacillota~Bacilli~Desulfuribacillales~Desulfuribacillaceae~Desulfuribacillus~Desulfuribacillus	87.32	0.0045	0	0	0.2252	0	0	0.1447	0
OTU_618	Eukaryota(85);Eukaryota(85);Eukaryota(85);Eukaryota(85);Eukaryota(85);Eukaryota(85);			0	0	0.0018	0	0	0	0	0
OTU_62	unknown;unknown(0);unknown(0);unknown(0);unknown(0);unknown(0);			0	0	0.1412	0	0	0	0	0
OTU_620	Bacteria(100);Verrucomicrobiota(98);Verrucomicrobiae(98);Opitutales(98);Puniceicoccaceae(97);Puniceicoccaceae(97);	Bacteria~Verrucomicrobiota~Verrucomicrobiae~Opitutales~JAFGAQ01~JAKSBQ01~JAKSBQ01	98.286	0	0	0.0028	0	0	0	0	0
OTU_622	Bacteria(100);Proteobacteria(100);Alphaproteobacteria(100);Parvibaculales(100);Parvibaculaceae(100);Parvibaculum(100);	Bacteria~Pseudomonadota~Alphaproteobacteria~Paracaedibacterales~Paracaedibacteraceae~JAHBYH01~JAHBYH01	88.669	0	0	0.0025	0	0	0	0	0
OTU_624	Bacteria(100);Gemmatimonadota(98);BD2-11_terrestrial_group(98);BD2-11_terrestrial_group_or(98);BD2-11_terrestrial_group_fa(98);BD2-11_terrestrial_group_ge(98);	Bacteria~Gemmatimonadota~Gemmatimonadetes~Longimicrobiales~UBA6960~UBA2982~UBA2982	91.977	0.0536	0	0	0	0	0	0	0
OTU_625	Eukaryota(83);Eukaryota(83);Eukaryota(83);Eukaryota(83);Eukaryota(83);Eukaryota(83);			0	0.0294	0	0	0	0	0	0
OTU_626	Bacteria(100);Proteobacteria(100);Alphaproteobacteria(100);Defluviicoccales(91);Defluviicoccaceae(87);Defluviicoccus(87);	Bacteria~Pseudomonadota~Alphaproteobacteria~Rhodospirillales_A~UXAT02~REEP01~REEP01	91.429	0	0	0	0	0	0	0.0689	0
OTU_627	Bacteria(100);Firmicutes(100);Clostridia(100);Clostridia_or(99);Hungateiclostridiaceae(99);Hungateiclostridiaceae(99);	Bacteria~Bacillota_A~Clostridia~Saccharofermentanales~Fastidiosipilaceae~JAAVLZ01~JAAVLZ01	100	0.0268	0	0	0	0	0	0.0207	0
OTU_629	Bacteria(100);Desulfobacterota(100);Syntrophia(100);Syntrophales(100);uncultured(100);uncultured_ge(100);	Bacteria~Desulfobacterota~Syntrophia~Syntrophales~UBA2210~MLS-D~MLS-D	95.143	0.0313	0	0	0	0	0	0	0
OTU_63	Bacteria(100);Actinobacteriota(100);Acidimicrobiia(100);Microtrichales(100);Ilumatobacteraceae(100);Ilumatobacter(100);	Bacteria~Actinomycetota~Acidimicrobiia~Acidimicrobiales~Ilumatobacteraceae~Ilumatobacter~Ilumatobacter	91.429	0.067	0	0.1839	0.9009	0	0.0054	0.0413	0.0069
OTU_630	Bacteria(99);Bacteria(99);Bacteria(99);Bacteria(99);Bacteria(99);Bacteria(99);	Bacteria~Gemmatimonadota~Gemmatimonadetes~Gemmatimonadales~GWC2-71-9~B3T1B10~B3T1B10	98	0.0223	0.0042	0	0	0	0	0	0
OTU_631	Bacteria(100);Verrucomicrobiota(89);Verrucomicrobiae(89);Opitutales(88);Opitutales(88);Opitutales(88);	Bacteria~Verrucomicrobiota~Verrucomicrobiae~Opitutales~DSM-45221~UBA7441~UBA7441	92.857	0.0045	0	0	0	0	0	0.0276	0
OTU_632	Eukaryota(92);Eukaryota(92);Eukaryota(92);Eukaryota(92);Eukaryota(92);Eukaryota(92);			0	0	0	0	0	0.0071	0	0
OTU_633	Bacteria(100);Proteobacteria(100);Alphaproteobacteria(100);Caulobacterales(100);Caulobacteraceae(100);Brevundimonas(100);	Bacteria~Pseudomonadota~Alphaproteobacteria~Caulobacterales~Caulobacteraceae~Brevundimonas~Brevundimonas	93.484	0.0089	0.021	0	0	0	0	0.0069	0
OTU_636	Bacteria(100);Firmicutes(100);Clostridia(100);Proteinivoracales(100);uncultured(100);uncultured_ge(100);	Bacteria~Bacillota_D~Proteinivoracia~UBA4975~VEMY01~VEMY01~VEMY01	90.313	0.0402	0	0	0	0	0	0	0
OTU_64	Bacteria(100);Proteobacteria(100);Gammaproteobacteria(100);Cellvibrionales(92);Halieaceae(89);Halieaceae(89);	Bacteria~Pseudomonadota~Gammaproteobacteria~Pseudomonadales~Halieaceae~Halioglobus~Halioglobus	99.429	0.0089	0.0713	0.1316	0	0	0	0	0
OTU_643	Bacteria(100);Bacteroidota(100);Bacteroidia(100);Bacteroidales(100);ML635J-40_aquatic_group(100);ML635J-40_aquatic_group_ge(100);	Bacteria~Chloroflexota~Chloroflexia~Chloroflexales~Chloroflexaceae~Chloroploca~Chloroploca	99.713	0.0179	0	0	0	0	0	0.0207	0
OTU_644	Bacteria(100);Bacteroidota(100);Bacteroidia(100);Cytophagales(100);Cyclobacteriaceae(100);Cyclobacteriaceae(100);	Bacteria~Bacteroidota~Bacteroidia~Cytophagales~Cyclobacteriaceae~Litoribacter~Litoribacter	91.453	0.0849	0.0042	0	0	0.0053	0	0	0
OTU_645	Eukaryota(85);Eukaryota(85);Eukaryota(85);Eukaryota(85);Eukaryota(85);Eukaryota(85);			0	0	0	0	0	0.0018	0	0.0034
OTU_646	Bacteria(100);Gemmatimonadota(100);BD2-11_terrestrial_group(100);BD2-11_terrestrial_group_or(100);BD2-11_terrestrial_group_fa(100);BD2-11_terrestrial_group_ge(100);	Bacteria~Gemmatimonadota~Gemmatimonadetes~Longimicrobiales~UBA6960~JACZXQ01~JACZXQ01	73.418	0.0536	0.0042	0	0	0	0	0.062	0
OTU_647	Bacteria(100);Planctomycetota(100);Phycisphaerae(100);Phycisphaerales(100);Phycisphaeraceae(100);uncultured(100);	Bacteria~Planctomycetota~Phycisphaerae~Phycisphaerales~Zrk34~Zrk34~Zrk34	90.274	0.0134	0	0	0	0	0.0071	0	0
OTU_65	Bacteria(100);Proteobacteria(100);Gammaproteobacteria(100);Legionellales(100);Legionellaceae(100);Legionella(100);	Bacteria~Pseudomonadota~Gammaproteobacteria~Legionellales~Legionellaceae~Legionella_A~Legionella_A	75.472	0	0	0.1103	0	0.0424	0.0518	0.0069	0
OTU_655	Bacteria(100);Acidobacteriota(100);Subgroup_21(100);Subgroup_21_or(100);Subgroup_21_fa(100);Subgroup_21_ge(100);	Bacteria~Acidobacteriota~UBA6911~RPQK01~RPQK01~JADFOI01~JADFOI01	99.714	0.0313	0	0	0	0	0	0	0
OTU_656	Bacteria(100);Acidobacteriota(100);Acidobacteriae(100);Bryobacterales(99);Bryobacteraceae(99);Bryobacter(99);	Bacteria~Acidobacteriota~Terriglobia~Bryobacterales~Bryobacteraceae~Ga0077553~Ga0077553	92.571	0	0	0.0011	0	0	0	0.062	0
OTU_657	Bacteria(100);Proteobacteria(100);Gammaproteobacteria(100);Pseudomonadales(99);Pseudomonadaceae(99);Pseudomonas(98);	Bacteria~Pseudomonadota~Gammaproteobacteria~Pseudomonadales~Pseudomonadaceae~Pseudomonas_E~Pseudomonas_E	92	0.0045	0	0	0	0	0.0018	0.0138	0.0011
OTU_658	Bacteria(100);Bacteroidota(100);Rhodothermia(100);Balneolales(100);Balneolaceae(100);Balneolaceae(100);	Bacteria~Bacteroidota~Rhodothermia~Balneolales~Balneolaceae~UBA2664~UBA2664	98.571	0	0	0	0	0	0	0.0965	0
OTU_66	Bacteria(100);Proteobacteria(100);Alphaproteobacteria(100);Sphingomonadales(100);Sphingomonadaceae(100);Porphyrobacter(100);	Bacteria~Pseudomonadota~Alphaproteobacteria~Sphingomonadales~Sphingomonadaceae~Erythrobacter~Erythrobacter	96.296	0.0045	0.1343	0.0647	0	0	0.2178	0	0.0504
OTU_668	Bacteria(100);Patescibacteria(100);Saccharimonadia(100);Saccharimonadales(100);Saccharimonadales(100);Saccharimonadales(100);	Bacteria~Patescibacteria~Saccharimonadia~Saccharimonadales~UBA4665~GCA-2746885~GCA-2746885	98.286	0.0223	0	0	0	0	0	0.0069	0
OTU_669	Bacteria(100);Gemmatimonadota(100);BD2-11_terrestrial_group(100);BD2-11_terrestrial_group_or(100);BD2-11_terrestrial_group_fa(100);BD2-11_terrestrial_group_ge(100);	Bacteria~Gemmatimonadota~Gemmatimonadetes~Longimicrobiales~UBA6960~JACZXQ01~JACZXQ01	99.429	0	0	0.0068	0	0	0	0	0
OTU_67	Bacteria(100);Proteobacteria(100);Alphaproteobacteria(100);Rhodobacterales(100);Rhodobacteraceae(100);Rhodobacteraceae(100);	Bacteria~Pseudomonadota~Alphaproteobacteria~Rhodobacterales~Rhodobacteraceae~Gemmobacter_B~Gemmobacter_B	93.714	0.304	0.0168	0.6196	0.9009	1.0654	0.0071	0.8339	0.094
OTU_674	Bacteria(100);Bacteroidota(100);Bacteroidia(100);Bacteroidia(100);Bacteroidia(100);Bacteroidia(100);	Bacteria~Chloroflexota~Chloroflexia~Chloroflexales~Chloroflexaceae~Chloroploca~Chloroploca	92.571	0.0179	0	0	0	0	0	0.0276	0
OTU_677	Bacteria(100);Bacteroidota(100);Bacteroidia(100);Cytophagales(100);Cyclobacteriaceae(100);Cecembia(100);	Bacteria~Bacteroidota~Bacteroidia~Cytophagales~Cyclobacteriaceae~Cecembia~Cecembia	91.429	0	0	0.0249	0	0.0318	0	0.0069	0.0011
OTU_678	Bacteria(100);Chloroflexi(99);Anaerolineae(99);Caldilineales(99);Caldilineaceae(99);uncultured(99);	Bacteria~Chloroflexota~Anaerolineae~Caldilineales~Caldilineaceae~RI-153~RI-153	90.571	0.0179	0	0	0	0	0	0	0
OTU_68	Bacteria(100);Cyanobacteria(100);Cyanobacteriia(100);Phormidesmiales(100);Phormidesmiaceae(99);Phormidesmiaceae_ge(99);	Bacteria~Cyanobacteriota~Cyanobacteriia~Phormidesmiales~Phormidesmiaceae~JAAUQI01~JAAUQI01	94.017	0.1296	0.2308	0.0363	0.6757	0.0212	0.0696	0.9234	0.2659
OTU_680	Bacteria(98);Verrucomicrobiota(92);Kiritimatiellae(87);Kiritimatiellae(87);Kiritimatiellae(87);Kiritimatiellae(87);	Bacteria~Verrucomicrobiota~Kiritimatiellia~Kiritimatiellales~Tichowtungiaceae~Tichowtungia~Tichowtungia	88.857	0	0.0168	0	0	0	0	0	0
OTU_687	Bacteria(100);Proteobacteria(100);Alphaproteobacteria(100);Rhodobacterales(100);Rhodobacteraceae(100);Yoonia-Loktanella(96);	Bacteria~Pseudomonadota~Alphaproteobacteria~Rhodobacterales~Rhodobacteraceae~Yoonia~Yoonia	95.143	0.0402	0.0042	0	0	0	0	0	0
OTU_69	Bacteria(100);Bacteroidota(98);Bacteroidia(97);Bacteroidia(97);Bacteroidia(97);Bacteroidia(97);	Bacteria~Pseudomonadota~Gammaproteobacteria~Nevskiales~Oceanococcaceae~MS8~MS8	95.17	0	0	0	0	0	0.5802	0	0
OTU_697	Bacteria(100);Desulfobacterota(100);Desulfuromonadia(99);Bradymonadales(99);Bradymonadaceae(99);Bradymonadaceae_ge(99);	Bacteria~Myxococcota~Bradymonadia~Bradymonadales~Bradymonadaceae~Lujinxingia~Lujinxingia	94.269	0.0089	0	0	0	0	0	0.0138	0
OTU_699	Bacteria(100);Firmicutes(98);Dethiobacteria(83);Dethiobacterales(83);Dethiobacteraceae(83);Dethiobacteraceae(83);	Bacteria~Bacillota_D~Dethiobacteria~SKNC01~SKNC01~Contubernalis~Contubernalis	98.286	0.0223	0	0	0	0	0	0.0069	0
OTU_7	Bacteria(100);Proteobacteria(100);Alphaproteobacteria(100);Caulobacterales(100);Hyphomonadaceae(100);Hyphomonadaceae(100);	Bacteria~Pseudomonadota~Alphaproteobacteria~Caulobacterales~Maricaulaceae~Glycocaulis~Glycocaulis	98.571	0	0.0336	5.7823	0	0	0.407	0.0276	0
OTU_70	Bacteria(100);Proteobacteria(99);Gammaproteobacteria(99);Gammaproteobacteria(99);Gammaproteobacteria(99);Gammaproteobacteria(99);	Bacteria~Pseudomonadota~Gammaproteobacteria~Pseudomonadales~HTCC2089~UBA11889~UBA11889	84.568	0.0447	0.0168	0.1035	0	0.0212	0.1018	0.7374	0.0011
OTU_700	Bacteria(100);Firmicutes(100);Moorellia(91);Desulfitibacterales(88);Desulfitibacteraceae(88);Desulfitibacter(88);	Bacteria~Bacillota_B~Moorellia~Desulfitibacterales~Desulfitibacteraceae~Desulfitibacter~Desulfitibacter	93.429	0.0089	0	0	0	0	0	0.0069	0
OTU_703	Bacteria(100);Proteobacteria(100);Alphaproteobacteria(100);Acetobacterales(100);Acetobacteraceae(100);Acetobacteraceae(100);	Bacteria~Pseudomonadota~Alphaproteobacteria~Acetobacterales~Acetobacteraceae~LMUY01~LMUY01	90.857	0.0089	0.0084	0	0	0	0	0.0069	0
OTU_706	Bacteria(100);Proteobacteria(100);Alphaproteobacteria(100);Sphingomonadales(100);Sphingomonadaceae(100);Sphingomonas(86);	Bacteria~Pseudomonadota~Alphaproteobacteria~Sphingomonadales~Sphingomonadaceae~Sphingomonas~Sphingomonas	97.143	0	0	0.0018	0	0	0.0018	0	0
OTU_707	Bacteria(100);Bacteroidota(100);Bacteroidia(100);Bacteroidales(100);Bacteroidetes_vadinHA17(99);Bacteroidetes_vadinHA17_ge(99);	Bacteria~Bacteroidota~Bacteroidia~Bacteroidales~VadinHA17~SLNP01~SLNP01	94.602	0.0447	0	0	0	0	0	0	0
OTU_708	Eukaryota(92);Eukaryota(92);Eukaryota(92);Eukaryota(92);Eukaryota(92);Eukaryota(92);			0.0447	0	0	0	0	0	0	0
OTU_709	Bacteria(100);Proteobacteria(100);Alphaproteobacteria(100);Caedibacterales(100);Caedibacteraceae(100);uncultured(100);	Bacteria~Pseudomonadota~Alphaproteobacteria~Rhodobacterales~Rhodobacteraceae~KMM-3653~KMM-3653	93.143	0	0	0	0	0.0159	0.0036	0	0
OTU_71	Bacteria(100);Proteobacteria(99);Alphaproteobacteria(98);Alphaproteobacteria(98);Alphaproteobacteria(98);Alphaproteobacteria(98);	Bacteria~Pseudomonadota~Alphaproteobacteria~UBA8366~GCA-2717185~GCA-2717185~GCA-2717185	96.286	0	0	0.1049	0	0.0212	0.0214	0.0413	0
OTU_710	Bacteria(100);Verrucomicrobiota(98);Kiritimatiellae(95);WCHB1-41(92);WCHB1-41_fa(92);WCHB1-41_ge(92);	Bacteria~Verrucomicrobiota~Kiritimatiellia~LD1-PB3_A~JAGNIJ01~JAGNIJ01~JAGNIJ01	95.238	0.0223	0	0	0	0	0	0.0345	0
OTU_711	Bacteria(100);Bacteroidota(100);Bacteroidia(100);Sphingobacteriales(91);Sphingobacteriales(91);Sphingobacteriales(91);	Bacteria~Pseudomonadota~Gammaproteobacteria~HTCC5015~HTCC5015~JACDDA01~JACDDA01	92.898	0.0313	0	0	0	0	0	0	0
OTU_715	Bacteria(100);Bacteroidota(100);Bacteroidia(100);Bacteroidales(100);ML635J-40_aquatic_group(100);ML635J-40_aquatic_group_ge(100);	Bacteria~Bacteroidota~Bacteroidia~Bacteroidales~JAIOZK01~JAIOZK01~JAIOZK01	91.429	0.0581	0	0	0	0	0	0.0069	0
OTU_718	Bacteria(100);Firmicutes(100);Bacilli(100);Erysipelotrichales(100);Erysipelotrichaceae(100);Erysipelothrix(96);	Bacteria~Bacillota~Bacilli~Erysipelotrichales~Erysipelotrichaceae~UBA6182~UBA6182	94	0.0358	0	0	0	0	0	0.0207	0
OTU_72	Bacteria(100);Cyanobacteria(100);Cyanobacteriia(100);Chloroplast(100);Chloroplast_fa(100);Chloroplast_ge(100);			2.2036	0.0378	0	0	0	0	0.0758	0
OTU_720	Bacteria(100);Spirochaetota(100);Spirochaetia(100);Spirochaetales(100);Spirochaetaceae(100);Spirochaetaceae(100);	Bacteria~WOR-3~Hydrothermia~LBFQ01~LBFQ01~JAADCS01~JAADCS01	91.04	0.0313	0	0	0	0	0	0.0689	0
OTU_721	Bacteria(100);Firmicutes(100);Dethiobacteria(100);Dethiobacterales(100);Dethiobacteraceae(100);uncultured(100);	Bacteria~Bacillota_B~Moorellia~Moorellales~Moorellaceae~Moorella~Moorella	95.184	0.0045	0	0	0	0	0	0.0207	0
OTU_723	Bacteria(100);Verrucomicrobiota(100);Verrucomicrobiae(100);Opitutales(100);Puniceicoccaceae(100);Puniceicoccaceae(100);	Bacteria~Verrucomicrobiota~Verrucomicrobiae~Opitutales~Opitutaceae~Synoicihabitans~Synoicihabitans	100	0.0223	0	0	0	0.0053	0	0.0138	0
OTU_724	Bacteria(100);Bacteroidota(100);Bacteroidia(100);Bacteroidales(98);ML635J-40_aquatic_group(98);ML635J-40_aquatic_group_ge(98);	Bacteria~Bacteroidota~Bacteroidia~Flavobacteriales~Salibacteraceae~SHAN690~SHAN690	93.162	0.0223	0	0	0	0	0	0	0
OTU_729	unknown;unknown(0);unknown(0);unknown(0);unknown(0);unknown(0);	Bacteria~Bacillota_A~Clostridia~Tissierellales~Peptoniphilaceae~Anaerosphaera~Anaerosphaera	92.023	0.0134	0	0	0	0	0	0	0
OTU_73	Bacteria(100);Bacteroidota(100);Bacteroidia(100);Bacteroidales(100);ML635J-40_aquatic_group(100);ML635J-40_aquatic_group_ge(100);	Bacteria~Bacteroidota~Bacteroidia~Bacteroidales~UBA7960~SKVR01~SKVR01	81.191	1.551	0	0	0.9009	0	0	1.6884	0
OTU_730	Bacteria(100);Firmicutes(100);Desulfitobacteriia(87);Desulfitobacteriales(87);Desulfitobacteriales(87);Desulfitobacteriales(87);	Bacteria~Bacillota_B~TC1~TC1~UBA5767~UBA5767~UBA5767	89.752	0.0581	0	0	0	0	0	0.0069	0
OTU_732	unknown;unknown(0);unknown(0);unknown(0);unknown(0);unknown(0);	Bacteria~Pseudomonadota~Alphaproteobacteria~Rickettsiales~Midichloriaceae~Bandiella~Bandiella	93.447	0.0223	0	0	0	0	0	0	0
OTU_734	Bacteria(100);Firmicutes(100);Dethiobacteria(98);Dethiobacterales(98);Dethiobacteraceae(98);Dethiobacter(98);	Bacteria~Bacillota_D~Dethiobacteria~SKNC01~SKNC01~Contubernalis~Contubernalis	85.915	0.0313	0.0042	0	0	0	0	0.0138	0
OTU_737	Bacteria(100);Verrucomicrobiota(100);Chlamydiae(100);Chlamydiales(100);Chlamydiales(100);Chlamydiales(100);	Bacteria~Chlamydiota~Chlamydiia~Chlamydiales~JAAKFR01~JACKPM01~JACKPM01	98	0	0	0	0	0	0	0	0.0034
OTU_74	Bacteria(100);Proteobacteria(100);Gammaproteobacteria(100);Oceanospirillales(95);Pseudohongiellaceae(95);Pseudohongiella(95);	Bacteria~Pseudomonadota~Gammaproteobacteria~Pseudomonadales~Pseudohongiellaceae~Pseudohongiella~Pseudohongiella	96.601	0.076	0	0.0825	0.2252	0.0159	0.0036	0.1378	0
OTU_741	Bacteria(100);Proteobacteria(100);Gammaproteobacteria(100);Oceanospirillales(100);Halomonadaceae(100);Halomonas(94);	Bacteria~Pseudomonadota~Gammaproteobacteria~Pseudomonadales~Halomonadaceae~Halomonas~Halomonas	92.063	0	0	0.0043	0	0	0.0089	0	0
OTU_747	Bacteria(100);Firmicutes(100);Dethiobacteria(98);Dethiobacterales(98);Dethiobacteraceae(98);Dethiobacter(98);	Bacteria~Bacillota_D~Dethiobacteria~Dethiobacterales~Dethiobacteraceae~Dethiobacter~Dethiobacter	96.154	0.0134	0	0	0	0	0	0	0
OTU_749	Bacteria(100);Firmicutes(99);Bacilli(99);Thermoactinomycetales(99);Thermoactinomycetaceae(99);uncultured(85);	Bacteria~Bacillota~Bacilli~Thermoactinomycetales~Thermoactinomycetaceae~Paenactinomyces~Paenactinomyces	95.429	0	0	0	0	0	0.0143	0	0
OTU_75	Bacteria(100);Bacteroidota(100);Bacteroidia(100);Bacteroidales(99);Bacteroidetes_BD2-2(98);Bacteroidetes_BD2-2_ge(98);	Bacteria~Bacteroidota~Bacteroidia~Bacteroidales~JAAYUG01~JAAYUG01~JAAYUG01	92.898	1.9355	0.0042	0	0	0	0	0.8545	0
OTU_750	Bacteria(100);Verrucomicrobiota(100);Verrucomicrobiae(100);Opitutales(100);Puniceicoccaceae(100);Puniceicoccaceae(100);	Bacteria~Verrucomicrobiota~Verrucomicrobiae~Opitutales~Opitutaceae~Synoicihabitans~Synoicihabitans	94	0	0.0168	0	0	0	0	0.0069	0
OTU_751	Bacteria(100);Deinococcota(100);Deinococci(100);Deinococcales(100);Trueperaceae(100);Truepera(100);	Bacteria~Deinococcota~Deinococci~Deinococcales~Trueperaceae~JAABTL01~JAABTL01	93.143	0.0045	0	0	0	0	0	0	0.0069
OTU_753	Eukaryota(82);Eukaryota(82);Eukaryota(82);Eukaryota(82);Eukaryota(82);Eukaryota(82);			0	0.021	0	0	0	0	0	0
OTU_757	Bacteria(100);Planctomycetota(100);Planctomycetes(100);Pirellulales(100);Pirellulaceae(100);Blastopirellula(98);	Bacteria~Planctomycetota~Planctomycetia~Pirellulales~Pirellulaceae~Bremerella~Bremerella	89.441	0.0358	0	0	0	0	0	0	0
OTU_758	Bacteria(100);Gemmatimonadota(100);BD2-11_terrestrial_group(100);BD2-11_terrestrial_group_or(100);BD2-11_terrestrial_group_fa(100);BD2-11_terrestrial_group_ge(100);	Bacteria~Gemmatimonadota~Gemmatimonadetes~Longimicrobiales~UBA6960~UBA2982~UBA2982	92.023	0.0268	0	0	0	0	0	0	0
OTU_76	Bacteria(100);Bacteroidota(100);Bacteroidia(100);Flavobacteriales(100);Flavobacteriaceae(100);Flavobacterium(100);	Bacteria~Bacteroidota~Bacteroidia~Flavobacteriales~Flavobacteriaceae~Flavobacterium~Flavobacterium	87.017	0	0	0.0132	0	0	0.3517	0	0
OTU_760	Bacteria(100);Bacteroidota(100);Bacteroidia(100);Bacteroidales(99);Bacteroidetes_BD2-2(91);Bacteroidetes_BD2-2_ge(91);	Bacteria~Bacteroidota~Bacteroidia~Bacteroidales~UBA10428~JAAAOM01~JAAAOM01	100	0.0223	0	0	0	0	0	0.0069	0
OTU_761	Bacteria(100);Cyanobacteria(100);Cyanobacteriia(100);Chloroplast(100);Chloroplast_fa(100);Chloroplast_ge(100);	Bacteria~Bacteroidota~Bacteroidia~NS11-12g~UBA8524~SB11~SB11	95.429	0.0134	0	0	0	0	0	0	0
OTU_762	Bacteria(100);Bacteria(100);Bacteria(100);Bacteria(100);Bacteria(100);Bacteria(100);	Bacteria~Bdellovibrionota~UBA2361~UBA2361~JAFLCA01~JAIBBV01~JAIBBV01	99.714	0	0	0	0	0	0	0.0276	0
OTU_763	Bacteria(100);Proteobacteria(100);Gammaproteobacteria(100);Alteromonadales(100);Idiomarinaceae(100);Aliidiomarina(98);	Bacteria~Pseudomonadota~Gammaproteobacteria~Enterobacterales_A~Alteromonadaceae~Aliidiomarina~Aliidiomarina	89.08	0.0447	0	0	0	0	0	0	0
OTU_764	Bacteria(100);Planctomycetota(100);Planctomycetes(100);Pirellulales(100);Pirellulaceae(100);Pirellula(92);	Bacteria~Planctomycetota~Planctomycetia~Pirellulales~Pirellulaceae~Aureliella~Aureliella	94.857	0	0	0	0	0	0	0.0207	0
OTU_765	Bacteria(100);Verrucomicrobiota(100);Verrucomicrobiae(100);Chthoniobacterales(100);Chthoniobacterales(100);Chthoniobacterales(100);	Bacteria~Verrucomicrobiota~Verrucomicrobiae~Chthoniobacterales~Terrimicrobiaceae~Terrimicrobium~Terrimicrobium	91.586	0	0	0	0	0	0	0.0276	0
OTU_77	Bacteria(100);Cyanobacteria(100);Cyanobacteriia(100);Oxyphotobacteria_Incertae_Sedis(100);Unknown_Family(100);Leptolyngbya_LEGE-06070(100);	Bacteria~Cyanobacteriota~Cyanobacteriia~Elainellales~Elainellaceae~RECH01~RECH01	91.714	0.1117	0.0084	0	0	0.0053	0.0018	2.1156	0.0011
OTU_778	Bacteria(100);Proteobacteria(100);Gammaproteobacteria(100);Oceanospirillales(100);Nitrincolaceae(100);Nitrincola(100);	Bacteria~Pseudomonadota~Gammaproteobacteria~Pseudomonadales~Nitrincolaceae~Nitrincola~Nitrincola	91.714	0	0.042	0	0	0	0	0	0
OTU_78	Bacteria(100);Bacteroidota(100);Bacteroidia(100);Flavobacteriales(100);Flavobacteriaceae(100);Psychroflexus(96);	Bacteria~Bacteroidota~Bacteroidia~Flavobacteriales~Flavobacteriaceae~Psychroflexus~Psychroflexus	99.429	0.0089	0	0	0	1.0866	0	0	0
OTU_785	Bacteria(100);Bacteroidota(100);Bacteroidia(100);Cytophagales(100);Cyclobacteriaceae(100);Cyclobacteriaceae(100);	Bacteria~Bacteroidota~Bacteroidia~Cytophagales~Cyclobacteriaceae~Lunatimonas~Lunatimonas	90.395	0.0447	0.0587	0.4094	0	0.0053	0.0232	0.0138	0
OTU_787	Bacteria(100);Bacteroidota(100);Bacteroidia(100);Bacteroidales(100);ML635J-40_aquatic_group(100);ML635J-40_aquatic_group_ge(100);	Bacteria~Bacteroidota~Bacteroidia~Bacteroidales~F082~JALNZU01~JALNZU01	89.429	0.0581	0	0	0	0	0	0.0207	0
OTU_789	Bacteria(100);Actinobacteriota(100);Actinobacteria(100);Micrococcales(100);Microbacteriaceae(100);Microbacteriaceae_ge(89);	Bacteria~Actinomycetota~Actinomycetia~Actinomycetales~Microbacteriaceae~Pontimonas~Pontimonas	99.714	0	0	0.0018	0	0	0.0089	0	0
OTU_79	Bacteria(100);Actinobacteriota(100);Actinobacteria(100);Nitriliruptorales(100);Nitriliruptoraceae(100);Nitriliruptoraceae(100);	Bacteria~Actinomycetota~Actinomycetia~Nitriliruptorales~Nitriliruptoraceae~Nitriliruptor~Nitriliruptor	91.143	1.0951	0	0.0068	0	0	0	0.0413	0.0011
OTU_790	Bacteria(100);Cyanobacteria(100);Cyanobacteriia(100);Chloroplast(100);Chloroplast_fa(100);Chloroplast_ge(100);	Bacteria~Cyanobacteriota~Cyanobacteriia~Cyanobacteriales~Coleofasciculaceae~Caldora~Caldora	98.857	0.0358	0.0294	0	0	0	0	0.0069	0
OTU_797	Bacteria(94);Cyanobacteria(94);Cyanobacteriia(94);Cyanobacteriales(94);Cyanobacteriaceae(94);Cyanobacterium_PCC-7202(87);	Bacteria~Cyanobacteriota~Cyanobacteriia~Cyanobacteriales~Cyanobacteriaceae~Cyanobacterium~Cyanobacterium	94.286	0	0	0.0011	0	0	0	0	0
OTU_798	Bacteria(100);Actinobacteriota(100);Actinobacteria(100);Micromonosporales(100);Micromonosporaceae(100);Longispora(94);	Bacteria~Actinomycetota~Actinomycetia~Mycobacteriales~Micromonosporaceae~Natronosporangium~Natronosporangium	97.714	0.076	0	0	0	0	0	0	0
OTU_799	Bacteria(100);Proteobacteria(100);Alphaproteobacteria(100);Rhodobacterales(100);Rhodobacteraceae(100);Rhodobacteraceae(100);	Bacteria~Pseudomonadota~Alphaproteobacteria~Rhodobacterales~Rhodobacteraceae~Shimia~Shimia	90.778	0.0134	0	0	0	0	0	0	0
OTU_8	Bacteria(100);Bacteria(100);Bacteria(100);Bacteria(100);Bacteria(100);Bacteria(100);	Bacteria~Pseudomonadota~Gammaproteobacteria~JAGOUN01~JAGOUN01~JAGOUN01~JAGOUN01	94.737	0	0	4.4098	0	0	0	0	0
OTU_80	Bacteria(100);Proteobacteria(100);Gammaproteobacteria(100);Ga0077536(98);Ga0077536_fa(98);Ga0077536_ge(98);	Bacteria~Pseudomonadota~Gammaproteobacteria~Ga0077536~Ga0077536~JACKNG01~JACKNG01	88.319	0	0	0.0662	0	0	0	0.0138	0
OTU_800	Bacteria(100);Firmicutes(100);Bacilli(100);Haloplasmatales(100);Haloplasmataceae(100);Haloplasma(100);	Bacteria~Bacillota~Bacilli~Haloplasmatales~Haloplasmataceae~Inordinaticella~Inordinaticella	84.9	0.0313	0	0	0	0	0	0	0
OTU_801	Bacteria(100);Actinobacteriota(100);Actinobacteria(100);Nitriliruptorales(100);Nitriliruptoraceae(100);Nitriliruptoraceae(100);	Bacteria~Actinomycetota~Actinomycetia~Nitriliruptorales~Nitriliruptoraceae~Nitriliruptor~Nitriliruptor	92.264	0.0045	0	0	0	0	0.0161	0	0
OTU_802	Bacteria(100);Firmicutes(100);Clostridia(100);Peptostreptococcales-Tissierellales(100);Peptostreptococcales-Tissierellales_fa(100);Anoxynatronum(94);	Bacteria~Bacillota_A~Clostridia~Peptostreptococcales~Tindalliaceae~Tindallia~Tindallia	89.235	0.0089	0	0	0	0	0	0.0345	0
OTU_807	Eukaryota(86);Eukaryota(86);Eukaryota(86);Eukaryota(86);Eukaryota(86);Eukaryota(86);			0	0	0	0	0	0.025	0	0.0138
OTU_808	Bacteria(100);Bacteroidota(100);Bacteroidia(100);Bacteroidales(93);Bacteroidales(93);Bacteroidales(93);	Bacteria~Bacteroidota~Bacteroidia~Bacteroidales~GCA-2748055~GCA-2748055~GCA-2748055	98.266	0.0223	0	0	0	0	0	0	0
OTU_81	Bacteria(100);Proteobacteria(100);Gammaproteobacteria(100);HOC36(96);HOC36_fa(96);HOC36_ge(96);	Bacteria~Pseudomonadota~Gammaproteobacteria~Methylococcales~Methylococcaceae~Methylococcus~Methylococcus	97.143	0.1386	0	0	0.2252	0	0	1.144	0
OTU_810	Bacteria(100);Verrucomicrobiota(100);Verrucomicrobiae(100);Verrucomicrobiales(100);DEV007(100);DEV007_ge(100);	Bacteria~Verrucomicrobiota~Verrucomicrobiae~Verrucomicrobiales~DEV007~Arctic95D-9~Arctic95D-9	98.571	0.0045	0	0	0	0	0	0.0413	0
OTU_811	Bacteria(100);Proteobacteria(100);Gammaproteobacteria(100);Nitrosococcales(100);Methylophagaceae(100);Methylophaga(100);	Bacteria~Pseudomonadota~Gammaproteobacteria~Nitrosococcales~Methylophagaceae~Methylophaga~Methylophaga	97.143	0.0045	0.0294	0.0025	0	0.0106	0	0	0
OTU_812	Bacteria(100);Hydrogenedentes(100);Hydrogenedentia(100);Hydrogenedentiales(100);Hydrogenedensaceae(100);Hydrogenedensaceae_ge(100);	Bacteria~Hydrogenedentota~Hydrogenedentia~Hydrogenedentiales~CAITNO01~JAAYYZ01~JAAYYZ01	98.857	0.0045	0	0	0	0	0	0.0345	0
OTU_813	Bacteria(100);Desulfobacterota(100);Desulfobulbia(100);Desulfobulbales(100);Desulfobulbaceae(100);Desulfobulbus(95);	Bacteria~Desulfobacterota~Desulfobulbia~Desulfobulbales~Desulfobulbaceae~Desulfobulbus~Desulfobulbus	91.977	0.0223	0	0	0	0	0	0.0138	0
OTU_814	Bacteria(100);Halanaerobiaeota(100);Halanaerobiia(100);Halanaerobiales(100);Halobacteroidaceae(100);uncultured(100);	Bacteria~Bacillota_C~Negativicutes~Selenomonadales~Massilibacillaceae~Massilibacillus~Massilibacillus	91.761	0.0045	0	0	0	0	0	0.0138	0
OTU_815	Bacteria(95);Proteobacteria(90);Alphaproteobacteria(90);Rickettsiales(90);Mitochondria(90);Mitochondria_ge(90);	Bacteria~Pseudomonadota~Gammaproteobacteria~Nitrosococcales~Methylophagaceae~GCA-002733105~GCA-002733105	100	0.0134	0	0	0	0	0	0.0069	0
OTU_816	Bacteria(100);Planctomycetota(100);Phycisphaerae(100);Phycisphaerales(100);Phycisphaeraceae(100);SM1A02(99);	Bacteria~Planctomycetota~Phycisphaerae~Phycisphaerales~UBA1924~PNC22~PNC22	85.976	0	0	0	0	0	0	0.0276	0
OTU_818	Bacteria(100);Cyanobacteria(100);Cyanobacteriia(100);Cyanobacteriales(100);Oscillatoriaceae(100);Oscillatoria_PCC-6304(100);	Bacteria~Cyanobacteriota~Cyanobacteriia~Cyanobacteriales~PCC-6304~PCC-6304~PCC-6304	92.767	0	0.0294	0	0	0	0	0	0
OTU_819	Bacteria(100);Proteobacteria(100);Alphaproteobacteria(100);Rhodobacterales(100);Rhodobacteraceae(100);Rhodobacteraceae(100);	Bacteria~Pseudomonadota~Alphaproteobacteria~Rhodobacterales~Rhodobacteraceae~Pararhodobacter~Pararhodobacter	97.714	0.0492	0.1594	0.0043	0	0.4081	0.0018	0.124	0.0023
OTU_822	Bacteria(100);Planctomycetota(100);Phycisphaerae(100);Phycisphaerales(100);Phycisphaeraceae(100);SM1A02(99);	Bacteria~Planctomycetota~Phycisphaerae~Phycisphaerales~UBA1924~JADLCM01~JADLCM01	93.714	0.0134	0	0	0	0	0	0.0689	0
OTU_823	Bacteria(100);Cloacimonadota(100);Cloacimonadia(100);Cloacimonadales(100);MSBL8(99);MSBL8_ge(99);	Bacteria~Cloacimonadota~Cloacimonadia~Cloacimonadales~JAJBBL01~JAHYIR01~JAHYIR01	93.714	0.0268	0	0	0	0	0	0.0138	0
OTU_824	Bacteria(100);Patescibacteria(100);Saccharimonadia(100);Saccharimonadales(100);Saccharimonadales_fa(85);Saccharimonadales_ge(85);	Bacteria~Patescibacteria~Saccharimonadia~Saccharimonadales~UBA4665~GCA-2746885~GCA-2746885	97.429	0.0268	0	0	0	0	0	0	0
OTU_825	Bacteria(100);Gemmatimonadota(100);BD2-11_terrestrial_group(100);BD2-11_terrestrial_group_or(100);BD2-11_terrestrial_group_fa(100);BD2-11_terrestrial_group_ge(100);	Bacteria~Gemmatimonadota~Gemmatimonadetes~Longimicrobiales~UBA6960~UBA2982~UBA2982	99.714	0.0179	0	0	0	0	0	0	0
OTU_826	Bacteria(100);Firmicutes(97);Clostridia(95);Clostridia(95);Clostridia(95);Clostridia(95);	Bacteria~Bacillota_B~Peptococcia~Peptococcales~Desulfonisporaceae~Desulfonispora~Desulfonispora	98	0.0134	0	0	0	0	0	0	0
OTU_828	Eukaryota(94);Eukaryota(94);Eukaryota(94);Eukaryota(94);Eukaryota(94);Eukaryota(94);			0	0	0.0025	0	0	0	0	0
OTU_83	Bacteria(100);Gemmatimonadota(100);BD2-11_terrestrial_group(100);BD2-11_terrestrial_group_or(100);BD2-11_terrestrial_group_fa(100);BD2-11_terrestrial_group_ge(100);	Bacteria~Gemmatimonadota~Gemmatimonadetes~Longimicrobiales~UBA6960~UBA2982~UBA2982	96.571	0.1028	0.0042	0	0.9009	0	0	0.5858	0.1078
OTU_831	Bacteria(100);Proteobacteria(100);Gammaproteobacteria(100);Alteromonadales(100);Alteromonadales_Incertae_Sedis(100);Alkalimonas(100);	Bacteria~Pseudomonadota~Gammaproteobacteria~Enterobacterales_A~Alteromonadaceae~Alkalimonas~Alkalimonas	92.571	0	0.0462	0	0	0	0	0	0
OTU_84	Bacteria(100);Planctomycetota(97);Phycisphaerae(97);Phycisphaerales(93);Phycisphaeraceae(93);uncultured(86);	Bacteria~Planctomycetota~Phycisphaerae~Phycisphaerales~Phycisphaeraceae~JAFIFY01~JAFIFY01	90.517	0.0045	0	0	0	0.0371	0.15	0.0689	0.0974
OTU_846	Bacteria(100);Bacteria(100);Bacteria(100);Bacteria(100);Bacteria(100);Bacteria(100);	Bacteria~Bdellovibrionota~UBA2394~UBA2394~UBA2394~REDG01~REDG01	89.041	0	0	0.0018	0	0	0	0	0
OTU_847	Bacteria(100);Firmicutes(100);Dethiobacteria(99);Dethiobacterales(99);Dethiobacteraceae(99);uncultured(99);	Bacteria~Bacillota_D~Dethiobacteria~Dethiobacterales~Dethiobacteraceae~Dethiobacter~Dethiobacter	91.329	0.0268	0	0	0	0	0	0.062	0
OTU_85	Bacteria(100);Proteobacteria(100);Gammaproteobacteria(100);Ectothiorhodospirales(100);Ectothiorhodospiraceae(100);Thioalkalivibrio(100);	Bacteria~Pseudomonadota~Gammaproteobacteria~Ectothiorhodospirales~Ectothiorhodospiraceae~Thioalkalivibrio_A~Thioalkalivibrio_A	97.406	1.037	0.0042	0	2.2523	0	0	1.1784	0
OTU_851	Eukaryota(83);Eukaryota(83);Eukaryota(83);Eukaryota(83);Eukaryota(83);Eukaryota(83);			0	0	0.0014	0	0	0	0	0
OTU_856	Bacteria(100);Bacteroidota(100);Bacteroidia(100);Cytophagales(100);Cyclobacteriaceae(100);Lunatimonas(92);	Bacteria~Bacteroidota~Bacteroidia~Cytophagales~Cyclobacteriaceae~Lunatimonas~Lunatimonas	94.017	0	0	0.0075	0	0	0	0	0
OTU_857	Bacteria(100);Bacteroidota(100);Rhodothermia(100);Balneolales(100);Balneolaceae(100);Balneolaceae(100);	Bacteria~Bacteroidota~Rhodothermia~Balneolales~Cyclonatronaceae~Cyclonatronum~Cyclonatronum	93.714	0	0	0	0	0	0	0.0207	0
OTU_858	Bacteria(100);Firmicutes(100);Clostridia(99);Lachnospirales(90);Lachnospiraceae(83);Lachnospiraceae(83);	Bacteria~Bacillota_A~Clostridia~Lachnospirales~Vallitaleaceae~Vallitalea~Vallitalea	91.714	0	0	0	0	0	0	0.0482	0
OTU_859	Bacteria(100);Actinobacteriota(82);Actinobacteriota(82);Actinobacteriota(82);Actinobacteriota(82);Actinobacteriota(82);	Bacteria~Actinomycetota~Thermoleophilia~Solirubrobacterales~Solirubrobacteraceae~Baekduia~Baekduia	98.286	0	0	0	0	0	0	0.0207	0
OTU_86	Bacteria(100);Proteobacteria(100);Alphaproteobacteria(100);Rhodobacterales(100);Rhodobacteraceae(100);Rhodobaculum(99);	Bacteria~Pseudomonadota~Alphaproteobacteria~Rhodobacterales~Rhodobacteraceae~Rhodobaculum~Rhodobaculum	90.449	2.5121	0.2266	0.0605	1.5766	1.8234	0.0089	3.487	0.5353
OTU_863	Bacteria(100);Bacteroidota(100);Bacteroidia(100);Flavobacteriales(100);Flavobacteriaceae(100);Flavobacterium(100);	Bacteria~Pseudomonadota~Gammaproteobacteria~Enterobacterales_A~Alteromonadaceae~Pararheinheimera~Pararheinheimera	99.143	0	0	0.0004	0	0	0	0	0.0034
OTU_864	Archaea(100);Halobacterota(100);Methanosarcinia(100);Methanosarciniales(100);Methanosarcinaceae(100);Methanosarcina(100);	Archaea~Halobacteriota~Methanosarcinia~Methanosarcinales~Methanosarcinaceae~Methanosarcina~Methanosarcina	95.714	0.0313	0	0	0	0	0	0.0069	0
OTU_865	Bacteria(100);Gemmatimonadota(100);BD2-11_terrestrial_group(100);BD2-11_terrestrial_group_or(100);BD2-11_terrestrial_group_fa(100);BD2-11_terrestrial_group_ge(100);	Bacteria~Gemmatimonadota~Gemmatimonadetes~Longimicrobiales~UBA6960~JACZXQ01~JACZXQ01	90.476	0	0	0	0.2252	0	0	0.0345	0
OTU_866	Bacteria(80);Bacteria(80);Bacteria(80);Bacteria(80);Bacteria(80);Bacteria(80);	Bacteria~Pseudomonadota~Alphaproteobacteria~Rickettsiales~Anaplasmataceae~AB001-6~AB001-6	89.137	0.0268	0.0042	0	0	0	0	0	0
OTU_870	Bacteria(100);Proteobacteria(100);Gammaproteobacteria(100);Gammaproteobacteria(100);Gammaproteobacteria(100);Gammaproteobacteria(100);	Bacteria~Pseudomonadota~Gammaproteobacteria~Methylococcales~Methylococcaceae~Methylococcus~Methylococcus	99.714	0.0045	0	0	0	0	0	0.0276	0
OTU_872	Bacteria(83);Bacteria(83);Bacteria(83);Bacteria(83);Bacteria(83);Bacteria(83);	Bacteria~Pseudomonadota~Alphaproteobacteria~Paracaedibacterales~Paracaedibacteraceae~Paracaedibacter_A~Paracaedibacter_A	98.857	0	0	0	0	0	0.0054	0	0
OTU_873	Bacteria(100);Planctomycetota(100);Phycisphaerae(100);Phycisphaerales(100);Phycisphaeraceae(100);SM1A02(100);	Bacteria~Planctomycetota~Phycisphaerae~Phycisphaerales~UBA1924~SLFH01~SLFH01	98.286	0	0	0.0039	0	0	0	0	0
OTU_875	unknown;unknown(0);unknown(0);unknown(0);unknown(0);unknown(0);			0	0	0	0	0	0.0036	0	0.0011
OTU_88	unknown;unknown(0);unknown(0);unknown(0);unknown(0);unknown(0);			0.1967	0	0	0	0	0	1.6332	0
OTU_883	Bacteria(99);Bacteria(99);Bacteria(99);Bacteria(99);Bacteria(99);Bacteria(99);	Bacteria~Bdellovibrionota~UBA2394~UBA2394~UBA2394~1-14-0-20-45-16~1-14-0-20-45-16	94.286	0	0	0.01	0	0	0	0	0
OTU_885	Bacteria(99);Desulfobacterota(82);Desulfobacterota(82);Desulfobacterota(82);Desulfobacterota(82);Desulfobacterota(82);	Bacteria~Myxococcota~Bradymonadia~REDH01~REDH01~REDH01~REDH01	91.092	0	0	0.0018	0	0	0	0	0
OTU_887	Bacteria(100);Bacteroidota(100);Bacteroidia(100);Cytophagales(100);Cyclobacteriaceae(100);Anditalea(96);	Bacteria~Bacteroidota~Bacteroidia~Cytophagales~Cyclobacteriaceae~Anditalea~Anditalea	97.714	0.067	0	0	0	0	0	0.0069	0
OTU_889	Eukaryota(80);Eukaryota(80);Eukaryota(80);Eukaryota(80);Eukaryota(80);Eukaryota(80);			0	0.0126	0	0	0	0	0	0
OTU_89	Bacteria(99);Bacteria(99);Bacteria(99);Bacteria(99);Bacteria(99);Bacteria(99);	Bacteria~Myxococcota~Bradymonadia~REDH01~REDH01~REDH01~REDH01	90.883	0.0223	0	0.0562	0.2252	0	0	0.0276	0.0229
OTU_891	Bacteria(100);Proteobacteria(99);Gammaproteobacteria(99);Methylococcales(98);Methylomonadaceae(98);Methylomicrobium(93);	Bacteria~Pseudomonadota~Gammaproteobacteria~Methylococcales~Methylomonadaceae~Methylotuvimicrobium~Methylotuvimicrobium	97.143	0.0089	0	0	0	0	0	0.0069	0
OTU_893	Bacteria(100);Firmicutes(100);Clostridia(100);Clostridiales(100);Clostridiaceae(100);Youngiibacter(96);	Bacteria~Bacillota_A~Clostridia~Clostridiales~Clostridiaceae~Youngiibacter~Youngiibacter	94.556	0.0089	0	0	0	0	0	0	0
OTU_896	Bacteria(97);Proteobacteria(97);Alphaproteobacteria(96);Rickettsiales(96);Mitochondria(96);Mitochondria_ge(96);			0.0089	0	0	0	0	0	0	0
OTU_9	Bacteria(100);Bacteroidota(100);Rhodothermia(100);Balneolales(100);Balneolaceae(100);ML310M-34(100);	Bacteria~Bacteroidota~Rhodothermia~Balneolales~Cyclonatronaceae~Cyclonatronum~Cyclonatronum	94.253	0.0536	0.1301	1.9213	0	0.0371	9.8402	0.0069	0.4952
OTU_90	Bacteria(100);Bacteroidota(100);Rhodothermia(100);Balneolales(100);Balneolaceae(100);Rhodohalobacter(99);	Bacteria~Bacteroidota~Rhodothermia~Balneolales~Balneolaceae~Rhodohalobacter~Rhodohalobacter	91.501	0.0045	0	0.0523	0.2252	0.0053	0	0.0689	0
OTU_901	Bacteria(100);Firmicutes(100);Clostridia(100);Peptostreptococcales-Tissierellales(100);Peptostreptococcales-Tissierellales_fa(93);Peptostreptococcales-Tissierellales_fa(93);	Bacteria~Bacillota_A~Clostridia~Peptostreptococcales~Natronincolaceae~Serpentinicella~Serpentinicella	96	0.0223	0	0	0	0	0	0.0069	0
OTU_905	Bacteria(100);Verrucomicrobiota(100);Verrucomicrobiae(100);Verrucomicrobiae(100);Verrucomicrobiae(100);Verrucomicrobiae(100);	Bacteria~Verrucomicrobiota~Verrucomicrobiae~Chthoniobacterales~UBA10450~Udaeobacter~Udaeobacter	86.286	0.0089	0	0	0	0	0	0	0
OTU_906	Bacteria(100);Dependentiae(100);Babeliae(100);Babeliales(100);Babeliales(100);Babeliales(100);	Bacteria~Dependentiae~Babeliae~Babeliales~Babeliaceae~UBA12395~UBA12395	95.143	0	0	0	0	0	0	0.0138	0
OTU_907	Bacteria(100);Gemmatimonadota(100);BD2-11_terrestrial_group(100);BD2-11_terrestrial_group_or(100);BD2-11_terrestrial_group_fa(100);BD2-11_terrestrial_group_ge(100);	Bacteria~Gemmatimonadota~Gemmatimonadetes~Longimicrobiales~UBA6960~JACZXQ01~JACZXQ01	97.126	0.0179	0	0	0	0	0	0	0
OTU_908	Bacteria(100);Firmicutes(100);Dethiobacteria(100);Dethiobacterales(100);Dethiobacteraceae(100);uncultured(100);	Bacteria~Bacillota_D~Dethiobacteria~Dethiobacterales~Dethiobacteraceae~Dethiobacter~Dethiobacter	94.286	0.0179	0	0	0	0	0	0	0
OTU_909	Bacteria(100);Proteobacteria(100);Gammaproteobacteria(100);Gammaproteobacteria(100);Gammaproteobacteria(100);Gammaproteobacteria(100);	Bacteria~Pseudomonadota~Gammaproteobacteria~Pseudomonadales~HTCC2089~UBA7803~UBA7803	94.842	0.0089	0	0	0	0	0	0	0
OTU_91	Bacteria(100);Proteobacteria(100);Alphaproteobacteria(100);Alphaproteobacteria(100);Alphaproteobacteria(100);Alphaproteobacteria(100);	Bacteria~Pseudomonadota~Alphaproteobacteria~DSM-16000~Inquilinaceae~Inquilinus~Inquilinus	98.857	0	0	0	0	0	0.2696	0	0
OTU_915	Bacteria(99);Bacteroidota(99);Bacteroidia(99);Bacteroidales(95);ML635J-40_aquatic_group(95);ML635J-40_aquatic_group_ge(95);	Bacteria~Bacteroidota~Bacteroidia~Bacteroidales~UBA7960~SKVR01~SKVR01	93.696	0.0581	0	0	0	0	0	0.0069	0
OTU_918	Eukaryota(86);Eukaryota(86);Eukaryota(86);Eukaryota(86);Eukaryota(86);Eukaryota(86);			0	0	0	0	0	0.0036	0	0
OTU_919	Bacteria(100);Actinobacteriota(100);Actinobacteria(100);Euzebyales(100);Euzebyaceae(100);uncultured(100);	Bacteria~Actinomycetota~Actinomycetia~Euzebyales~Egibacteraceae~WHTC01~WHTC01	98	0.0089	0	0	0	0	0	0.0069	0
OTU_92	Bacteria(84);Proteobacteria(82);Alphaproteobacteria(81);Rickettsiales(81);Mitochondria(81);Mitochondria_ge(81);	Bacteria~Pseudomonadota~Gammaproteobacteria~Nitrosococcales~Methylophagaceae~GCA-002733105~GCA-002733105	93.827	0.1073	0.3692	0.0004	0	0.0159	0	0.1103	0
OTU_925	Bacteria(100);Chloroflexi(100);OLB14(87);OLB14_or(87);OLB14_fa(87);OLB14_ge(87);	Bacteria~Chloroflexota~Dehalococcoidia~Tepidiformales~Tepidiformaceae~FeB-14~FeB-14	93.447	0	0	0	0	0	0	0.0276	0
OTU_927	Bacteria(100);Desulfobacterota(100);Desulfobacteria(100);Desulfobacterales(100);Desulfosarcinaceae(85);Desulfosarcinaceae(85);	Bacteria~Desulfobacterota~Desulfobacteria~Desulfobacterales~Desulfococcaceae~Desulfococcus~Desulfococcus	94.302	0.0089	0	0	0	0	0	0	0
OTU_928	Bacteria(100);Proteobacteria(100);Alphaproteobacteria(100);Rhodobacterales(99);Rhodobacteraceae(99);Rhodobacteraceae(99);	Bacteria~Pseudomonadota~Alphaproteobacteria~Rhodobacterales~Rhodobacteraceae~Paracoccus~Paracoccus	89.235	0.4783	0.0587	0.0996	0	0.5831	0.0036	0.6822	0.0539
OTU_934	Bacteria(100);Cyanobacteria(100);Cyanobacteriia(100);Phormidesmiales(100);Nodosilineaceae(100);Nodosilinea_PCC-7104(100);	Bacteria~Cyanobacteriota~Cyanobacteriia~Phormidesmiales~Phormidesmiaceae~Nodosilinea~Nodosilinea	89.398	0.0089	0	0.0004	0	0	0	0.0276	0.0011
OTU_938	Bacteria(99);Bacteroidota(89);Bacteroidia(88);Bacteroidia(88);Bacteroidia(88);Bacteroidia(88);	Bacteria~Bacteroidota~Bacteroidia~NS11-12g~UBA9320~UBA987~UBA987	98.857	0	0	0	0	0	0.0036	0	0
OTU_94	Bacteria(100);Bacteroidota(100);Bacteroidia(100);Bacteroidales(100);ML635J-40_aquatic_group(100);ML635J-40_aquatic_group_ge(100);	Bacteria~Bacteroidota~Bacteroidia~Bacteroidales~UBA7960~SKVR01~SKVR01	94.286	0.1296	0	0	1.3514	0	0	0.317	0.1685
OTU_948	unknown;unknown(0);unknown(0);unknown(0);unknown(0);unknown(0);			0	0.0336	0	0	0	0	0	0
OTU_95	Bacteria(100);Proteobacteria(100);Gammaproteobacteria(100);Steroidobacterales(100);Woeseiaceae(100);JTB255_marine_benthic_group(100);	Bacteria~Pseudomonadota~Gammaproteobacteria~XN24~XN24~XN24~XN24	94.857	0.2995	0	0	0	0	0	0.6547	0
OTU_951	Bacteria(100);Firmicutes(100);Bacilli(100);RF39(100);RF39_fa(100);RF39_ge(100);	Bacteria~Bacillota~Bacilli~RF39~UBA660~DUPI01~DUPI01	96.571	0.0089	0	0	0	0	0	0.0138	0
OTU_953	Eukaryota(84);Eukaryota(84);Eukaryota(84);Eukaryota(84);Eukaryota(84);Eukaryota(84);			0	0.0168	0	0	0	0	0	0
OTU_954	unknown;unknown(0);unknown(0);unknown(0);unknown(0);unknown(0);			0	0.0126	0	0	0	0	0	0
OTU_96	Bacteria(100);Cyanobacteria(100);Cyanobacteriia(100);Cyanobacteriales(100);Microcystaceae(100);Synechocystis_PCC-6803(100);	Bacteria~Cyanobacteriota~Cyanobacteriia~Cyanobacteriales~Microcystaceae_B~Synechocystis~Synechocystis	86.378	0.0223	0	0	4.0541	0.1007	0	0.7374	0
OTU_961	Bacteria(100);Firmicutes(100);Dethiobacteria(100);Dethiobacterales(100);Dethiobacteraceae(100);uncultured(100);	Bacteria~Bacillota_D~Dethiobacteria~Dethiobacterales~Dethiobacteraceae~Dethiobacter~Dethiobacter	93.429	0.0134	0	0	0	0	0	0.0138	0
OTU_97	Bacteria(100);Bacteroidota(100);Rhodothermia(100);Balneolales(100);Balneolaceae(100);CK06-06-Mud-MAS4B-21(100);	Bacteria~Bacteroidota~Rhodothermia~Balneolales~Natronogracilivirgulaceae~Natronogracilivirgula~Natronogracilivirgula	98.575	0	0.1762	0.0932	0	0.0159	0.0446	0.0207	0.1479
OTU_978	Bacteria(100);Proteobacteria(100);Gammaproteobacteria(100);Legionellales(100);Legionellaceae(100);Legionella(91);	Bacteria~Pseudomonadota~Gammaproteobacteria~Legionellales~Legionellaceae~JAFIFT01~JAFIFT01	92.308	0	0	0	0	0.318	0	0.0138	0
OTU_98	Bacteria(95);Proteobacteria(89);Proteobacteria(89);Proteobacteria(89);Proteobacteria(89);Proteobacteria(89);	Bacteria~Desulfobacterota~Desulfobacteria~Desulfobacterales~Desulfosarcinaceae~UBA2230~UBA2230	100	0.371	0.1217	0	0	0	0	0.193	0
OTU_984	unknown;unknown(0);unknown(0);unknown(0);unknown(0);unknown(0);			0	0	0	0	0	0.0071	0	0
OTU_986	Bacteria(100);Proteobacteria(99);Gammaproteobacteria(99);Gammaproteobacteria(99);Gammaproteobacteria(99);Gammaproteobacteria(99);	Bacteria~Pseudomonadota~Gammaproteobacteria~Nitrococcales~AK92~AK92~AK92	92.857	0.0358	0	0	0	0	0	0	0
OTU_989	Bacteria(100);Bacteria(100);Bacteria(100);Bacteria(100);Bacteria(100);Bacteria(100);	Bacteria~Bdellovibrionota~UBA2394~UBA2394~UBA2394~REDG01~REDG01	90.057	0	0	0	0	0	0	0.0207	0
OTU_99	Bacteria(100);Sumerlaeota(86);Sumerlaeia(86);Sumerlaeales(86);Sumerlaeaceae(86);Sumerlaea(86);	Bacteria~Sumerlaeota~Sumerlaeia~SLMS01~SLMS01~JAFIGB01~JAFIGB01	90.031	0	0	0.0459	0	0	0	0	0.0011
OTU_990	Bacteria(100);Desulfobacterota(100);Syntrophia(100);Syntrophales(100);uncultured(100);uncultured_ge(100);	Bacteria~Desulfobacterota~Syntrophia~Syntrophales~UBA2210~MLS-D~MLS-D	94	0.0089	0	0	0	0	0	0	0
OTU_992	Bacteria(100);Bdellovibrionota(99);Bdellovibrionia(99);Bacteriovoracales(99);Bacteriovoracaceae(99);Bacteriovoracaceae(99);	Bacteria~Bdellovibrionota~Bacteriovoracia~Bacteriovoracales~Bacteriovoracaceae~Halobacteriovorax~Halobacteriovorax	94.857	0	0	0	0	0.0053	0	0.0207	0
OTU_994	Bacteria(100);Desulfobacterota(84);Desulfobacterota(84);Desulfobacterota(84);Desulfobacterota(84);Desulfobacterota(84);	Bacteria~Myxococcota~UBA9042~PHBI01~PHBI01~JACKFA01~JACKFA01	93.143	0.0045	0	0	0	0	0	0.0138	0
OTU_995	Bacteria(100);Desulfobacterota(95);Desulfuromonadia(95);Bradymonadales(95);Bradymonadaceae(95);Bradymonadaceae_ge(95);	Bacteria~Myxococcota~Bradymonadia~Bradymonadales~Bradymonadaceae~Lujinxingia~Lujinxingia	89.855	0.0089	0	0	0	0.0318	0	0.0069	0
OTU_996	Bacteria(100);Myxococcota(100);Polyangia(100);Polyangia(100);Polyangia(100);Polyangia(100);	Bacteria~Myxococcota~Polyangia~Haliangiales~Haliangiaceae~UBA2376~UBA2376	78.531	0	0	0	0	0	0	0.0276	0
OTU_999	Bacteria(100);Bacteria(100);Bacteria(100);Bacteria(100);Bacteria(100);Bacteria(100);	Bacteria~Bdellovibrionota~UBA2361~UBA2361~JAGFJO01~JAGFJO01~JAGFJO01	93.678	0	0	0	0	0	0	0.0345	0

## Sheet: S3
Sample	Alpha diversity metrics			Beta diversity metrics (Bray Curtis Distance Matrix)
	Abundance-based Coverage Estimator	Shannon diversity	Simpson diversity	DL-T0	DL-T120	DL-T390	GE-T0	GE-T120	GE-T390	PL-T0	PL-T390	NMDS1	NMDS2
DL-T0	321.686	3.60002	0.047079	0	0.762234	0.979864	0.965463	0.840875	0.938383	0.61001	0.935535	-0.109509	-0.16531475
DL-T120	145.448	2.76182	0.099109	0.762234	0	0.978131	0.985171	0.85016	0.938709	0.813478	0.951707	-0.0676553	-0.25740670
DL-T390	52.4645	2.52844	0.158369	0.979864	0.978131	0	0.998835	0.917763	0.930869	0.965449	0.955099	0.465224	-0.05459357
GE-T0	157.023	3.38768	0.069896	0.965463	0.985171	0.998835	0	0.977214	0.993907	0.941959	0.993066	-0.51871034	0.11729105
GE-T120	70.0003	2.16696	0.217579	0.840875	0.85016	0.917763	0.977214	0	0.914691	0.65671	0.834653	0.0626274	-0.02211114
GE-T390	63.4814	1.3682	0.505348	0.938383	0.938709	0.930869	0.993907	0.914691	0	0.930834	0.411768	0.16383340	0.23215511
PL-T0	163.43	3.65324	0.069591	0.61001	0.813478	0.965449	0.941959	0.65671	0.930834	0	0.869404	-0.0453933	-0.06984250
PL-T390	45.8483	1.54517	0.347782	0.935535	0.951707	0.955099	0.993066	0.834653	0.411768	0.869404	0	0.04958318	0.21982250

## Sheet: S4
user_genome	GTDB classification	Completeness (%)	Contamination (%)	Relative abundace_SR(%)	Relative abundace_LR(%)	GC	N50 (bp)	Genome size (bp)
bin.14	d__Archaea;p__Nanoarchaeota;c__Nanoarchaeia;o__Woesearchaeales;f__UBA583;g__UBA583;s__	57.9	0.72	0.01	0.18	0.285	27793	642042
bin.52	d__Bacteria;p__Acidobacteriota;c__Terriglobia;o__Bryobacterales;f__Bryobacteraceae;g__JACTMJ01;s__	94.74	0.07	0.27	0.4	0.592	176091	5139469
bin.35	d__Bacteria;p__Actinomycetota;c__Acidimicrobiia;o__Acidimicrobiales;f__;g__;s__	76.79	2.71	0.15	0.25	0.693	55753	4274169
bin.9	d__Bacteria;p__Actinomycetota;c__Acidimicrobiia;o__Acidimicrobiales;f__Microtrichaceae;g__SKRR01;s__	98.02	6.79	0.19	2.68	0.718	3964415	4261189
bin.55	d__Bacteria;p__Actinomycetota;c__Nitriliruptoria;o__Nitriliruptorales;f__Nitriliruptoraceae;g__CSBr16-57R1;s__	96.12	0.24	0.02	1.1	0.707	2355019	2360713
bin.16	d__Bacteria;p__Actinomycetota;c__Nitriliruptoria;o__Nitriliruptorales;f__Nitriliruptoraceae;g__CSSed11-175R1;s__	45.24	2.98	0.01	0.17	0.706	23125	2690770
bin.23	d__Bacteria;p__Armatimonadota;c__Fimbriimonadia;o__Fimbriimonadales;f__Fimbriimonadaceae;g__;s__	97.01	0.37	0.12	4.03	0.582	2741888	2741888
bin.13	d__Bacteria;p__Bacteroidota;c__Bacteroidia;o__Chitinophagales;f__Saprospiraceae;g__PWJY01;s__PWJY01 sp007695145	97.21	0.22	3.47	0.97	0.422	2847584	4297863
bin.39	d__Bacteria;p__Bacteroidota;c__Bacteroidia;o__Cytophagales;f__Cyclobacteriaceae;g__Cecembia;s__	64.03	0.69	0.15	0.2	0.41	32682	2792068
bin.18	d__Bacteria;p__Bacteroidota;c__Bacteroidia;o__Cytophagales;f__Cyclobacteriaceae;g__Mongoliibacter;s__	79.16	1.27	0.07	0.32	0.389	134772	4450017
bin.32	d__Bacteria;p__Bacteroidota;c__Bacteroidia;o__Flavobacteriales;f__Cryomorphaceae;g__T3Sed10-241;s__	97.16	4.15	0.5	0.45	0.519	175784	4423511
bin.17	d__Bacteria;p__Bacteroidota;c__Bacteroidia;o__Flavobacteriales;f__Flavobacteriaceae;g__Flavobacterium;s__	67.39	1.15	0.19	0.2	0.357	41326	2165605
bin.62	d__Bacteria;p__Bacteroidota;c__Bacteroidia;o__Flavobacteriales;f__Schleiferiaceae;g__CSBr16-58;s__	99.95	0.03	0.07	1.11	0.41	3855180	3855180
bin.37	d__Bacteria;p__Bacteroidota;c__Bacteroidia;o__Flavobacteriales;f__Schleiferiaceae;g__CSBr16-58;s__CSBr16-58 sp020832345	77.46	4.36	0	0.35	0.414	127756	4285157
bin.43	d__Bacteria;p__Bacteroidota;c__Bacteroidia;o__JACCXN01;f__JACCXN01;g__;s__	71.25	2.29	0.16	0.21	0.322	34403	3219795
bin.25	d__Bacteria;p__Bacteroidota;c__Rhodothermia;o__Balneolales;f__Cyclonatronaceae;g__Cyclonatronum;s__Cyclonatronum sp020832405	100	0.01	1.05	7.76	0.517	4547910	4547910
bin.2	d__Bacteria;p__Bacteroidota;c__Rhodothermia;o__Balneolales;f__HLUCCA01;g__HLUCCA01;s__	69.14	1.49	0.29	0.44	0.465	321448	2523059
bin.11	d__Bacteria;p__Bdellovibrionota;c__Oligoflexia;o__Oligoflexales;f__;g__;s__	85.01	0.3	0.01	0.3	0.497	100018	3419564
bin.24	d__Bacteria;p__Chlamydiota;c__Chlamydiia;o__Chlamydiales;f__Waddliaceae;g__Waddlia;s__	50.79	1.88	0.03	0.18	0.431	48909	1564560
bin.22	d__Bacteria;p__Cyanobacteriota;c__Cyanobacteriia;o__Cyanobacteriales;f__Cyanobacteriaceae;g__Cyanobacterium;s__	99.98	0	0.23	1.38	0.377	3360335	3360335
bin.63	d__Bacteria;p__Cyanobacteriota;c__Cyanobacteriia;o__Cyanobacteriales;f__Geitlerinemaceae;g__Sodalinema;s__Sodalinema gerasimenkoae	49.96	2.92	2.53	0.18	0.518	18000	2783873
bin.26	d__Bacteria;p__Cyanobacteriota;c__Cyanobacteriia;o__Cyanobacteriales;f__Geitlerinemaceae;g__Sodalinema;s__Sodalinema sp007693465	100	0	13.17	1.52	0.516	5049202	5049202
bin.61	d__Bacteria;p__Cyanobacteriota;c__Cyanobacteriia;o__Phormidesmiales;f__Phormidesmiaceae;g__Nodosilinea;s__	100	4.43	0.8	11.23	0.578	4923360	5361013
bin.29	d__Bacteria;p__Cyanobacteriota;c__Cyanobacteriia;o__Phormidesmiales;f__Phormidesmiaceae;g__Nodosilinea;s__Nodosilinea sp007135385	100	4.71	0.35	0.86	0.547	1670195	6448393
bin.10	d__Bacteria;p__Cyanobacteriota;c__Cyanobacteriia;o__Phormidesmiales;f__Phormidesmiaceae;g__PXDR01;s__	99.92	0.01	0.37	0.79	0.565	4309127	4309127
bin.47	d__Bacteria;p__Cyanobacteriota;c__Cyanobacteriia;o__RECH01;f__RECH01;g__RECH01;s__RECH01 sp007694125	95.67	1.36	0.46	0.48	0.537	77556	5605926
bin.42	d__Bacteria;p__Gemmatimonadota;c__Gemmatimonadetes;o__Longimicrobiales;f__UBA6960;g__SKNW01;s__	96.66	4.69	0.83	0.48	0.711	1074302	4127342
bin.5	d__Bacteria;p__Hydrogenedentota;c__Hydrogenedentia;o__Hydrogenedentiales;f__;g__;s__	88.19	1.3	0.16	0.51	0.646	921109	4611155
bin.7	d__Bacteria;p__Myxococcota;c__Bradymonadia;o__REDH01;f__REDH01;g__;s__	64.68	1.03	1.64	0.23	0.677	32673	3778143
bin.38	d__Bacteria;p__Myxococcota;c__UBA9042;o__JABWCM01;f__JABWCM01;g__;s__	91.09	1.89	0.3	0.89	0.713	1774507	9318079
bin.3	d__Bacteria;p__Planctomycetota;c__Phycisphaerae;o__Phycisphaerales;f__Phycisphaeraceae;g__JAFIFY01;s__	95.71	6.46	0.3	0.54	0.598	615046	5037837
bin.34	d__Bacteria;p__Planctomycetota;c__Phycisphaerae;o__Phycisphaerales;f__SM1A02;g__JAHBWZ01;s__	92.16	11.98	0.87	2.69	0.636	3977856	4459570
bin.30	d__Bacteria;p__Planctomycetota;c__Planctomycetia;o__Pirellulales;f__Pirellulaceae;g__;s__	88.64	7.19	0.03	0.41	0.635	250350	7221264
bin.44	d__Bacteria;p__Pseudomonadota;c__Alphaproteobacteria;o__Caulobacterales;f__Maricaulaceae;g__Oceanicaulis;s__	64.19	9.37	0.06	0.18	0.682	25895	3036833
bin.4	d__Bacteria;p__Pseudomonadota;c__Alphaproteobacteria;o__Ferrovibrionales;f__Ferrovibrionaceae;g__;s__	74.26	2.17	0.05	0.25	0.679	145502	4933485
bin.50	d__Bacteria;p__Pseudomonadota;c__Alphaproteobacteria;o__Rhizobiales;f__Beijerinckiaceae;g__Saliniramus;s__	56.33	3.19	0.03	0.14	0.643	39783	2429275
bin.46	d__Bacteria;p__Pseudomonadota;c__Alphaproteobacteria;o__Rhizobiales;f__Rhizobiaceae;g__ZYF759;s__	96.1	5.14	0.21	0.42	0.66	363067	4584220
bin.40	d__Bacteria;p__Pseudomonadota;c__Alphaproteobacteria;o__Rhodobacterales;f__Rhodobacteraceae;g__JAFIEC01;s__	69.54	3.06	0.04	0.24	0.677	53862	3167151
bin.54	d__Bacteria;p__Pseudomonadota;c__Alphaproteobacteria;o__Rhodobacterales;f__Rhodobacteraceae;g__JAFIEN01;s__	98.84	11.3	0.04	0.5	0.674	570611	4744596
bin.19	d__Bacteria;p__Pseudomonadota;c__Alphaproteobacteria;o__Rhodobacterales;f__Rhodobacteraceae;g__Pararhodobacter;s__Pararhodobacter sp020832545	55.63	0.21	0.27	0.2	0.632	26820	2490512
bin.57	d__Bacteria;p__Pseudomonadota;c__Alphaproteobacteria;o__Rhodobacterales;f__Rhodobacteraceae;g__Rhabdonatronobacter;s__	81.55	0.81	0.02	0.28	0.656	84028	3027534
bin.58	d__Bacteria;p__Pseudomonadota;c__Alphaproteobacteria;o__Rhodobacterales;f__Rhodobacteraceae;g__Roseinatronobacter;s__	100	0.1	6.59	1.07	0.586	4260495	4269214
bin.20	d__Bacteria;p__Pseudomonadota;c__Alphaproteobacteria;o__Rhodobacterales;f__Rhodobacteraceae;g__Roseinatronobacter;s__Roseinatronobacter sp020832555	92.68	2.38	0.22	1.02	0.618	1535517	3954477
bin.8	d__Bacteria;p__Pseudomonadota;c__Alphaproteobacteria;o__Rickettsiales;f__Rickettsiaceae;g__;s__	63.93	0.03	0.91	0.24	0.27	50381	906689
bin.33	d__Bacteria;p__Pseudomonadota;c__Alphaproteobacteria;o__Sphingomonadales;f__Sphingomonadaceae;g__Erythrobacter;s__Erythrobacter sp001724215	94.32	3	0.1	0.32	0.619	748146	2982641
bin.27	d__Bacteria;p__Pseudomonadota;c__Gammaproteobacteria;o__Enterobacterales;f__Alteromonadaceae;g__Alkalimonas;s__Alkalimonas sp020831925	90.03	0.5	3.82	0.27	0.517	46496	3317012
bin.41	d__Bacteria;p__Pseudomonadota;c__Gammaproteobacteria;o__Ga0077536;f__Ga0077536;g__JACKNG01;s__	44.93	0.83	0.06	0.17	0.666	23890	2285135
bin.45	d__Bacteria;p__Pseudomonadota;c__Gammaproteobacteria;o__GCA-2729495;f__GCA-2729495;g__JAFIFS01;s__JAFIFS01 sp020831895	99.34	0.28	0.54	0.84	0.667	2967441	2983350
bin.6	d__Bacteria;p__Pseudomonadota;c__Gammaproteobacteria;o__JAQSXL01;f__JAQSXL01;g__JAQSXL01;s__	100	1.75	17.19	3.72	0.411	1806446	2246340
bin.60	d__Bacteria;p__Pseudomonadota;c__Gammaproteobacteria;o__Pseudomonadales;f__Azotimanducaceae_A;g__SLTB01;s__SLTB01 sp020832055	59.03	2.78	0.04	0.24	0.651	55229	3757172
bin.36	d__Bacteria;p__Pseudomonadota;c__Gammaproteobacteria;o__Pseudomonadales;f__Azotimanducaceae_A;g__SLTB01;s__SLTB01 sp020832085	90.2	0.01	0.94	0.58	0.649	1058799	4143096
bin.64	d__Bacteria;p__Pseudomonadota;c__Gammaproteobacteria;o__Pseudomonadales;f__Halieaceae;g__;s__	48.86	2.26	0.63	0.38	0.602	27638	2597513
bin.15	d__Bacteria;p__Pseudomonadota;c__Gammaproteobacteria;o__PWYM01;f__PWYM01;g__PWYM01;s__	100	0.34	0.72	0.49	0.68	863988	3634723
bin.21	d__Bacteria;p__Pseudomonadota;c__Gammaproteobacteria;o__PWYM01;f__PWYM01;g__PWYM01;s__PWYM01 sp007693855	100	0.37	3.25	2.67	0.663	3858112	3858112
bin.12	d__Bacteria;p__Pseudomonadota;c__Gammaproteobacteria;o__PWYM01;f__PWYM01;g__PWYM01;s__PWYM01 sp020832005	99.91	0.89	0.74	0.36	0.642	151961	4020637
bin.1	d__Bacteria;p__Pseudomonadota;c__Gammaproteobacteria;o__Xanthomonadales;f__;g__;s__	100	0.07	1.16	4.13	0.623	6041428	6041428
bin.51	d__Bacteria;p__Pseudomonadota;c__Gammaproteobacteria;o__Xanthomonadales;f__Wenzhouxiangellaceae;g__Wenzhouxiangella;s__	83.06	2.04	0.04	0.24	0.624	35423	2852901
bin.53	d__Bacteria;p__Spirochaetota;c__Leptospirae;o__Leptospirales;f__Leptospiraceae;g__GCA-2786225;s__GCA-2786225 sp020831715	70.5	0.04	0.51	0.18	0.377	26322	2990631
bin.28	d__Bacteria;p__Spirochaetota;c__Spirochaetia;o__DSM-27196;f__SKKC01;g__SKKC01;s__SKKC01 sp007694005	89.1	7.47	0.39	0.34	0.574	71135	4311833
bin.31	d__Bacteria;p__Verrucomicrobiota;c__Kiritimatiellia;o__SS1-B-03-39;f__UBA6053;g__PXAS01;s__PXAS01 sp020831625	68.88	5.37	0.02	0.26	0.586	118471	4989139
bin.49	d__Bacteria;p__Verrucomicrobiota;c__Verrucomicrobiae;o__Opitutales;f__Oceanipulchritudinaceae;g__JAFIGE01;s__JAFIGE01 sp020831585	98.19	0.41	0.22	1.23	0.607	5089778	5747543
bin.59	d__Bacteria;p__Verrucomicrobiota;c__Verrucomicrobiae;o__Opitutales;f__Opitutaceae;g__REEB01;s__	84.8	2.32	0.33	0.24	0.563	28450	3516746

## Sheet: S5
user_genome	GTDB classification	Completeness (%)	Contamination (%)	Relative abundace_SR(%)	Relative abundace_LR(%)	GC	N50 (bp)	Genome size (bp)
bin.1	d__Bacteria;p__Pseudomonadota;c__Alphaproteobacteria;o__Caulobacterales;f__Maricaulaceae;g__Oceanicaulis;s__	100	0.45	4.88	1.42	0.668	2959770	2959770
bin.10	d__Bacteria;p__Planctomycetota;c__UBA11346;o__UBA11346;f__UBA11346;g__REDP01;s__	90.74	1.69	2.2	0.49	0.591	4683147	4894662
bin.11	d__Bacteria;p__Pseudomonadota;c__Gammaproteobacteria;o__Xanthomonadales;f__;g__;s__	100	0.05	4.65	2.77	0.623	6049331	6049331
bin.12	d__Bacteria;p__Bacteroidota;c__Bacteroidia;o__Chitinophagales;f__Saprospiraceae;g__PWJY01;s__PWJY01 sp007695145	96.03	0.21	0.55	0.79	0.425	3931244	3963751
bin.13	d__Bacteria;p__Cyanobacteriota;c__Cyanobacteriia;o__Cyanobacteriales;f__Geitlerinemaceae;g__Sodalinema;s__Sodalinema gerasimenkoae	99.99	0.36	55.29	19.41	0.518	2864343	4982329
bin.14	d__Bacteria;p__Bacteroidota;c__Bacteroidia;o__NS11-12g;f__UBA955;g__;s__	52	7.05	0.08	0.1	0.399	48067	1572351
bin.15	d__Bacteria;p__Pseudomonadota;c__Alphaproteobacteria;o__Rhodobacterales;f__Rhodobacteraceae;g__Rhabdonatronobacter;s__	55.66	1.98	0.05	0.11	0.657	49477	3217670
bin.16	d__Bacteria;p__Pseudomonadota;c__Alphaproteobacteria;o__Kiloniellales;f__DSM-21159;g__;s__	100	3.24	2.8	3.54	0.71	707031	5471886
bin.17	d__Bacteria;p__Bacteroidota;c__Bacteroidia;o__J057;f__JAJTIE01;g__JAHBTG01;s__	53.08	2.78	0.17	0.08	0.539	32293	1855560
bin.18	d__Bacteria;p__Bacteroidota;c__Bacteroidia;o__Flavobacteriales;f__Schleiferiaceae;g__CSBr16-58;s__CSBr16-58 sp020832345	92.72	5.09	0.36	0.16	0.41	118682	4791174
bin.19	d__Bacteria;p__Myxococcota;c__UBA796;o__UBA796;f__GCA-2862545;g__JARACJ01;s__	98.75	6.13	0.51	0.32	0.7	805131	5700222
bin.2	d__Bacteria;p__Bacteroidota;c__Bacteroidia;o__Flavobacteriales;f__Crocinitomicaceae;g__UBA6165;s__	99.97	1.13	0.81	0.51	0.397	4564632	4564632
bin.20	d__Bacteria;p__Pseudomonadota;c__Gammaproteobacteria;o__Pseudomonadales;f__Azotimanducaceae_A;g__SLTB01;s__SLTB01 sp020832055	83.44	1.84	0.29	0.56	0.647	1248330	4212908
bin.21	d__Bacteria;p__Pseudomonadota;c__Alphaproteobacteria;o__Rhodobacterales;f__Rhodobacteraceae;g__Roseinatronobacter;s__Roseinatronobacter sp007118295	99.97	1.44	0.28	0.94	0.622	1257493	4175339
bin.22	d__Bacteria;p__Bacteroidota;c__Bacteroidia;o__Cytophagales;f__Cyclobacteriaceae;g__Lunatimonas;s__	100	12.85	0.39	0.23	0.424	1347664	9637452
bin.23	d__Bacteria;p__Bacteroidota;c__Bacteroidia;o__Chitinophagales;f__Saprospiraceae;g__PWJY01;s__PWJY01 sp007693915	97.92	2.45	1.8	0.22	0.385	397750	4439032
bin.3	d__Bacteria;p__Planctomycetota;c__Planctomycetia;o__Pirellulales;f__Pirellulaceae;g__;s__	41.8	2.72	0.02	0.09	0.643	29244	5116719
bin.4	d__Bacteria;p__Verrucomicrobiota;c__Verrucomicrobiae;o__Opitutales;f__Oceanipulchritudinaceae;g__JAFIGE01;s__JAFIGE01 sp020831585	59.4	7.99	0.33	0.68	0.609	177633	4091016
bin.5	d__Bacteria;p__Spirochaetota;c__Spirochaetia;o__DSM-27196;f__Salinispiraceae;g__SKVS01;s__	92.11	6.98	0.12	0.22	0.424	2972197	4569971
bin.6	d__Bacteria;p__Pseudomonadota;c__Alphaproteobacteria;o__Ferrovibrionales;f__Ferrovibrionaceae;g__;s__	81.62	4.99	0.04	0.17	0.68	195480	5702198
bin.7	d__Bacteria;p__Planctomycetota;c__Phycisphaerae;o__Phycisphaerales;f__Phycisphaeraceae;g__JAFIFY01;s__	92.61	7.76	0.44	0.15	0.606	90145	5074569
bin.8	d__Bacteria;p__Pseudomonadota;c__Alphaproteobacteria;o__DSM-16000;f__Inquilinaceae;g__;s__	99.23	0.47	1.09	0.5	0.678	2920556	4637451
bin.9	d__Bacteria;p__Pseudomonadota;c__Alphaproteobacteria;o__Kiloniellales;f__DSM-21159;g__;s__	100	2.32	2.17	0.49	0.711	3921736	5249280

## Sheet: S6
Supplementary table S6: Taxonomic assignments and quality metrics for MAGs reconstructed from the long- and short-read sequencing of Goodenough Lake (GE) consortium
user_genome	GTDB classification	Completeness (%)	Contamination (%)	Relative abundace_SR(%)	Relative abundace_LR(%)	GC	N50 (bp)	Genome size (bp)
bin.1	d__Bacteria;p__Pseudomonadota;c__Gammaproteobacteria;o__Enterobacterales;f__Alteromonadaceae;g__Alkalimonas;s__Alkalimonas sp020831925	90.75	6.1	0	56.01	0.513	54051	4207483
bin.10	d__Bacteria;p__Pseudomonadota;c__Alphaproteobacteria;o__Caulobacterales;f__Maricaulaceae;g__Glycocaulis;s__	42.23	3.57	0.5	0.78	0.644	12227	2624244
bin.11	d__Bacteria;p__Cyanobacteriota;c__Cyanobacteriia;o__Cyanobacteriales;f__Geitlerinemaceae;g__Sodalinema;s__Sodalinema sp007693465	100	5.34	88.87	1.12	0.517	4951160	5366308
bin.12	d__Bacteria;p__Pseudomonadota;c__Gammaproteobacteria;o__PWYM01;f__PWYM01;g__PWYM01;s__PWYM01 sp007693855	87.94	14.52	0.15	0.68	0.671	22797	3638302
bin.13	d__Bacteria;p__Pseudomonadota;c__Gammaproteobacteria;o__Xanthomonadales;f__Wenzhouxiangellaceae;g__Wenzhouxiangella;s__Wenzhouxiangella sp007695005	99.98	0.51	0.6	0.2	0.618	4488882	4488882
bin.14	d__Bacteria;p__Pseudomonadota;c__Gammaproteobacteria;o__Xanthomonadales;f__Wenzhouxiangellaceae;g__Wenzhouxiangella;s__	80.23	3.87	0	0.25	0.626	25577	3273033
bin.15	d__Bacteria;p__Pseudomonadota;c__Gammaproteobacteria;o__Pseudomonadales;f__Azotimanducaceae_A;g__SLTB01;s__SLTB01 sp020832055	70.1	2.24	0.02	0.25	0.652	24087	3584454
bin.16	d__Bacteria;p__Pseudomonadota;c__Alphaproteobacteria;o__Rhodobacterales;f__Rhodobacteraceae;g__Pararhodobacter;s__	39.98	1.61	0.03	0.17	0.67	13208	2150242
bin.17	d__Bacteria;p__Bacteroidota;c__Bacteroidia;o__Flavobacteriales;f__Schleiferiaceae;g__;s__	45.3	7.61	0.07	0.22	0.399	16816	2685339
bin.2	d__Bacteria;p__Bacteroidota;c__Rhodothermia;o__Balneolales;f__Cyclonatronaceae;g__Cyclonatronum;s__Cyclonatronum sp020832405	100	2.07	0.15	0.8	0.523	4381498	4442751
bin.3	d__Bacteria;p__Planctomycetota;c__Phycisphaerae;o__Phycisphaerales;f__UBA1924;g__JANSXG01;s__	63.35	3.71	0.04	0.15	0.621	31735	2795522
bin.4	d__Bacteria;p__Pseudomonadota;c__Gammaproteobacteria;o__Pseudomonadales;f__Halomonadaceae;g__Billgrantia;s__	82.05	1.48	0.3	0.21	0.626	21694	3709963
bin.5	d__Bacteria;p__Verrucomicrobiota;c__Verrucomicrobiae;o__Opitutales;f__Opitutaceae;g__REEB01;s__	65.97	2.12	0.05	0.26	0.562	17580	3698908
bin.6	d__Bacteria;p__Planctomycetota;c__Phycisphaerae;o__Phycisphaerales;f__UBA1924;g__UBA6054;s__UBA6054 sp020831805	74.25	0.13	0.37	0.16	0.681	2193429	2267471
bin.7	d__Bacteria;p__Planctomycetota;c__UBA11346;o__UBA11346;f__UBA11346;g__REDP01;s__REDP01 sp007695355	82.12	2.97	0.26	0.11	0.597	43227	3824408
bin.8	d__Bacteria;p__Sumerlaeota;c__Sumerlaeia;o__SLMS01;f__JAHLLQ01;g__;s__	51.98	1.81	0.08	0.13	0.713	12162	3855907
bin.9	d__Bacteria;p__Pseudomonadota;c__Gammaproteobacteria;o__GCA-2729495;f__GCA-2729495;g__JAFIFS01;s__JAFIFS01 sp020831895	92.65	1.9	0.57	0.13	0.665	1430398	2668694

## Sheet: S7
Supplementary table S7: Taxonomic assignments and relative abundance (%) of the MAGs when mapped to short-reads of all three consortia
Classification	DL	PL	GE
d__Bacteria;p__Cyanobacteriota;c__Cyanobacteriia;o__Cyanobacteriales;f__Geitlerinemaceae;g__Sodalinema;s__Sodalinema sp007693465	13.17	0	88.87
d__Bacteria;p__Pseudomonadota;c__Gammaproteobacteria;o__Enterobacterales;f__Alteromonadaceae;g__Alkalimonas;s__Alkalimonas sp020831925	3.82	0	0
d__Bacteria;p__Bacteroidota;c__Bacteroidia;o__Chitinophagales;f__Saprospiraceae;g__PWJY01;s__PWJY01 sp007695145	3.47	0.55	0
d__Bacteria;p__Pseudomonadota;c__Gammaproteobacteria;o__PWYM01;f__PWYM01;g__PWYM01;s__PWYM01 sp007693855	3.25	0	0.15
d__Bacteria;p__Cyanobacteriota;c__Cyanobacteriia;o__Cyanobacteriales;f__Geitlerinemaceae;g__Sodalinema;s__Sodalinema gerasimenkoae	2.53	55.29	0
d__Bacteria;p__Bacteroidota;c__Rhodothermia;o__Balneolales;f__Cyclonatronaceae;g__Cyclonatronum;s__Cyclonatronum sp020832405	1.05	0	0.15
d__Bacteria;p__Pseudomonadota;c__Gammaproteobacteria;o__Pseudomonadales;f__Azotimanducaceae_A;g__SLTB01;s__SLTB01 sp020832085	0.94	0	0
d__Bacteria;p__Pseudomonadota;c__Gammaproteobacteria;o__PWYM01;f__PWYM01;g__PWYM01;s__PWYM01 sp020832005	0.74	0	0
d__Bacteria;p__Pseudomonadota;c__Gammaproteobacteria;o__GCA-2729495;f__GCA-2729495;g__JAFIFS01;s__JAFIFS01 sp020831895	0.54	0	0.57
d__Bacteria;p__Spirochaetota;c__Leptospirae;o__Leptospirales;f__Leptospiraceae;g__GCA-2786225;s__GCA-2786225 sp020831715	0.51	0	0
d__Bacteria;p__Cyanobacteriota;c__Cyanobacteriia;o__RECH01;f__RECH01;g__RECH01;s__RECH01 sp007694125	0.46	0	0
d__Bacteria;p__Spirochaetota;c__Spirochaetia;o__DSM-27196;f__SKKC01;g__SKKC01;s__SKKC01 sp007694005	0.39	0	0
d__Bacteria;p__Cyanobacteriota;c__Cyanobacteriia;o__Phormidesmiales;f__Phormidesmiaceae;g__Nodosilinea;s__Nodosilinea sp007135385	0.35	0	0
d__Bacteria;p__Pseudomonadota;c__Alphaproteobacteria;o__Rhodobacterales;f__Rhodobacteraceae;g__Pararhodobacter;s__Pararhodobacter sp020832545	0.27	0	0
d__Bacteria;p__Pseudomonadota;c__Alphaproteobacteria;o__Rhodobacterales;f__Rhodobacteraceae;g__Roseinatronobacter;s__Roseinatronobacter sp020832555	0.22	0	0
d__Bacteria;p__Verrucomicrobiota;c__Verrucomicrobiae;o__Opitutales;f__Oceanipulchritudinaceae;g__JAFIGE01;s__JAFIGE01 sp020831585	0.22	0.33	0
d__Bacteria;p__Pseudomonadota;c__Alphaproteobacteria;o__Sphingomonadales;f__Sphingomonadaceae;g__Erythrobacter;s__Erythrobacter sp001724215	0.1	0	0
d__Bacteria;p__Pseudomonadota;c__Gammaproteobacteria;o__Pseudomonadales;f__Azotimanducaceae_A;g__SLTB01;s__SLTB01 sp020832055	0.04	0.29	0.02
d__Bacteria;p__Verrucomicrobiota;c__Kiritimatiellia;o__SS1-B-03-39;f__UBA6053;g__PXAS01;s__PXAS01 sp020831625	0.02	0	0
d__Bacteria;p__Bacteroidota;c__Bacteroidia;o__Flavobacteriales;f__Schleiferiaceae;g__CSBr16-58;s__CSBr16-58 sp020832345	0	0.36	0
d__Bacteria;p__Bacteroidota;c__Bacteroidia;o__Chitinophagales;f__Saprospiraceae;g__PWJY01;s__PWJY01 sp007693915	0	1.8	0
d__Bacteria;p__Pseudomonadota;c__Alphaproteobacteria;o__Rhodobacterales;f__Rhodobacteraceae;g__Roseinatronobacter;s__Roseinatronobacter sp007118295	0	0.28	0
d__Bacteria;p__Planctomycetota;c__Phycisphaerae;o__Phycisphaerales;f__UBA1924;g__UBA6054;s__UBA6054 sp020831805	0	0	0.37
d__Bacteria;p__Planctomycetota;c__UBA11346;o__UBA11346;f__UBA11346;g__REDP01;s__REDP01 sp007695355	0	0	0.26
d__Bacteria;p__Pseudomonadota;c__Gammaproteobacteria;o__Xanthomonadales;f__Wenzhouxiangellaceae;g__Wenzhouxiangella;s__Wenzhouxiangella sp007695005	0	0	0.6
d__Bacteria;p__Other;c__Others;o__Other;f__Other;g__;s__Unclassified Species	35.85	18.25	1.07

## Sheet: S8
Central ID	Metaerg Annotation	Similar ID	Metaerg Annotation	Keyword	DL-Bin26	PL-Bin13	GE-Bin11
bin11.ctg109122.00001	cadherin-like domain-containing protein	bin11.ctg109122.00001	cadherin-like domain-containing protein			0.00012
bin11.ctg149842.00038	hypothetical protein E1H12_08695	bin11.ctg149842.00038	hypothetical protein E1H12_08695	Hypothetical protein		1e-05
bin11.ctg166677.00076		bin11.ctg166677.00076
bin11.ctg173661.00122	MAG: type II toxin-antitoxin system VapC family toxin	bin11.ctg173661.00122	MAG: type II toxin-antitoxin system VapC family toxin	Toxin antitoxin		0
bin11.ctg173661.00122	MAG: type II toxin-antitoxin system VapC family toxin	bin13.ctg68176.03397	MAG: type II toxin-antitoxin system VapC family toxin	Toxin antitoxin			0
bin11.ctg173661.00122	MAG: type II toxin-antitoxin system VapC family toxin	bin26.ctg33596.04648
bin11.ctg173661.00122	MAG: type II toxin-antitoxin system VapC family toxin	bin11.ctg196704.03535	MAG: type II toxin-antitoxin system VapC family toxin	Toxin antitoxin		0
bin11.ctg182512.00161	MAG: bifunctional sterol desaturase/short chain dehydrogenase	bin11.ctg182512.00161	MAG: bifunctional sterol desaturase/short chain dehydrogenase	Cofactor: Others		1e-05
bin11.ctg184489.00199	LPS export ABC transporter ATP-binding protein	bin11.ctg184489.00199	LPS export ABC transporter ATP-binding protein	Regulatory & Transport Genes		1e-05
bin11.ctg186031.00235	MAG: SUMF1/EgtB/PvdO family nonheme iron enzyme	bin11.ctg186031.00235	MAG: SUMF1/EgtB/PvdO family nonheme iron enzyme	Cofactor: Heme/Siroheme		0
bin11.ctg189993.00344	LSU ribosomal protein L19 RplS	bin11.ctg189993.00344	LSU ribosomal protein L19 RplS	Ribosomal Proteins		0.00016
bin11.ctg189993.00344	LSU ribosomal protein L19 RplS	bin13.ctg68160.02296	50S ribosomal protein L19	Ribosomal Proteins			7e-05
bin11.ctg189993.00344	LSU ribosomal protein L19 RplS	bin11.ctg196704.01969	LSU ribosomal protein L19 RplS	Ribosomal Proteins		0.00016
bin11.ctg189993.00344	LSU ribosomal protein L19 RplS	bin26.ctg33596.03395	50S ribosomal protein L19	Ribosomal Proteins	0.00011
bin11.ctg191186.00383	MAG: hypothetical protein JWS08_03930	bin11.ctg191186.00383	MAG: hypothetical protein JWS08_03930	Hypothetical protein		4e-05
bin11.ctg196704.00550	MAG: aminotransferase class V-fold PLP-dependent enzyme	bin11.ctg196704.00550	MAG: aminotransferase class V-fold PLP-dependent enzyme	Aminoacid biosynthesis		3e-05
bin11.ctg196704.00593	MAG: S8 family peptidase	bin11.ctg196704.00593	MAG: S8 family peptidase	Ribosomally synthesized and post-translationally modified peptide		0.00016
bin11.ctg196704.00679	ABC transporter ATP-binding protein/permease	bin11.ctg196704.00679	ABC transporter ATP-binding protein/permease	Regulatory & Transport Genes		2e-05
bin11.ctg196704.00679	ABC transporter ATP-binding protein/permease	bin11.ctg190026.00359	ABC transporter ATP-binding protein/permease	Regulatory & Transport Genes		2e-05
bin11.ctg196704.00679	ABC transporter ATP-binding protein/permease	bin13.ctg68139.00672	ABC transporter ATP-binding protein/permease	Regulatory & Transport Genes			5e-05
bin11.ctg196704.00679	ABC transporter ATP-binding protein/permease	bin26.ctg33596.01888	ABC transporter ATP-binding protein/permease	Regulatory & Transport Genes	7e-05
bin11.ctg196704.00756	MAG: NADH-quinone oxidoreductase subunit M	bin11.ctg196704.00756	MAG: NADH-quinone oxidoreductase subunit M	Citric acid		1e-05
bin11.ctg196704.00756	MAG: NADH-quinone oxidoreductase subunit M	bin13.ctg68139.00699	MAG: NADH-quinone oxidoreductase subunit M	Citric acid			0
bin11.ctg196704.00756	MAG: NADH-quinone oxidoreductase subunit M	bin26.ctg33596.01926
bin11.ctg196704.00802	MAG: hypothetical protein JWS08_03835	bin11.ctg196704.00802	MAG: hypothetical protein JWS08_03835	Hypothetical protein		8e-05
bin11.ctg196704.00842	MAG: hypothetical protein JWS08_04365	bin11.ctg196704.00842	MAG: hypothetical protein JWS08_04365	Hypothetical protein		4e-05
bin11.ctg196704.00927		bin11.ctg196704.00927				4e-05
bin11.ctg196704.00973	MAG: hypothetical protein JWS08_03655	bin11.ctg196704.00973	MAG: hypothetical protein JWS08_03655	Hypothetical protein		0
bin11.ctg196704.00973	MAG: hypothetical protein JWS08_03655	bin26.ctg33596.02039
bin11.ctg196704.01144	MAG: cell division protein FtsZ	bin11.ctg196704.01144	MAG: cell division protein FtsZ	Cell division		8e-05
bin11.ctg196704.01144	MAG: cell division protein FtsZ	bin13.ctg68160.01754	cell division protein FtsZ	Cell division			5e-05
bin11.ctg196704.01144	MAG: cell division protein FtsZ	bin26.ctg33596.02458	MAG: cell division protein FtsZ	Cell division	1e-05
bin11.ctg196704.01226	MAG: hypothetical protein JWS08_05510	bin11.ctg196704.01226	MAG: hypothetical protein JWS08_05510	Hypothetical protein		0.00058
bin11.ctg196704.01270	MAG: hypothetical protein JWS08_05665	bin11.ctg196704.01270	MAG: hypothetical protein JWS08_05665	Hypothetical protein		3e-05
bin11.ctg196704.01317	MAG: polysaccharide export protein	bin11.ctg196704.01317	MAG: polysaccharide export protein			1e-05
bin11.ctg196704.01419	MAG: PAS domain S-box protein	bin11.ctg196704.01419	MAG: PAS domain S-box protein	Regulatory & Transport Genes		1e-05
bin11.ctg196704.01509	MAG: DegT/DnrJ/EryC1/StrS family aminotransferase	bin11.ctg196704.01509	MAG: DegT/DnrJ/EryC1/StrS family aminotransferase	Aminoacid biosynthesis		1e-05
bin11.ctg196704.01551	MAG: 50S ribosomal protein L4	bin11.ctg196704.01551	MAG: 50S ribosomal protein L4	Ribosomal Proteins		0.00018
bin11.ctg196704.01551	MAG: 50S ribosomal protein L4	bin13.ctg68160.01343	50S ribosomal protein L4	Ribosomal Proteins			0.00014
bin11.ctg196704.01551	MAG: 50S ribosomal protein L4	bin26.ctg33596.02866	MAG: 50S ribosomal protein L4	Ribosomal Proteins	0.00012
bin11.ctg196704.01586	subtype III-A CRISPR-associated RAMP protein Csm3	bin11.ctg196704.01586	subtype III-A CRISPR-associated RAMP protein Csm3	Defense		1e-05
bin11.ctg196704.01671	class I SAM-dependent methyltransferase	bin11.ctg196704.01671	class I SAM-dependent methyltransferase	Methylation		6e-05
bin11.ctg196704.01708	hypothetical protein	bin11.ctg196704.01708	hypothetical protein	Hypothetical protein		2e-05
bin11.ctg196704.01803	MAG: CHASE2 domain-containing protein	bin11.ctg196704.01803	MAG: CHASE2 domain-containing protein	Stress response		0
bin11.ctg196704.01945	MAG: 50S ribosomal protein L27	bin11.ctg196704.01945	MAG: 50S ribosomal protein L27	Ribosomal Proteins		0.00075
bin11.ctg196704.01945	MAG: 50S ribosomal protein L27	bin26.ctg33596.03367	MAG: 50S ribosomal protein L27	Ribosomal Proteins	0.00066
bin11.ctg196704.01945	MAG: 50S ribosomal protein L27	bin13.ctg68160.02317	MAG: 50S ribosomal protein L27	Ribosomal Proteins			0.00024
bin11.ctg196704.02078	hypothetical protein	bin11.ctg196704.02078	hypothetical protein	Hypothetical protein		5e-05
bin11.ctg196704.02120		bin11.ctg196704.02120				0
bin11.ctg196704.02158	MAG: DUF433 domain-containing protein	bin11.ctg196704.02158	MAG: DUF433 domain-containing protein	Unknown		1e-05
bin11.ctg196704.02200	MAG: sodium:alanine symporter family protein	bin11.ctg196704.02200	MAG: sodium:alanine symporter family protein	Transport		1e-05
bin11.ctg196704.02246	hypothetical protein E1H12_01170	bin11.ctg196704.02246	hypothetical protein E1H12_01170	Hypothetical protein		0.00019
bin11.ctg196704.02246	hypothetical protein E1H12_01170	bin13.ctg68160.02016	hypothetical protein E1H12_01170	Hypothetical protein			5e-05
bin11.ctg196704.02246	hypothetical protein E1H12_01170	bin26.ctg33596.03127	hypothetical protein E1H12_01170	Hypothetical protein	0.00011
bin11.ctg196704.02326	iron uptake porin	bin11.ctg196704.02326	iron uptake porin	Cell wall		9e-05
bin11.ctg196704.02369	MAG: hypothetical protein JWS08_10565	bin11.ctg196704.02369	MAG: hypothetical protein JWS08_10565	Hypothetical protein		2e-05
bin11.ctg196704.02369	MAG: hypothetical protein JWS08_10565	bin13.ctg68176.02514	MAG: hypothetical protein JWS08_10565	Hypothetical protein			1e-05
bin11.ctg196704.02369	MAG: hypothetical protein JWS08_10565	bin26.ctg33596.03701
bin11.ctg196704.02424	MAG: nucleotidyltransferase family protein	bin11.ctg196704.02424	MAG: nucleotidyltransferase family protein			0
bin11.ctg196704.02424	MAG: nucleotidyltransferase family protein	bin26.ctg33596.03642
bin11.ctg196704.02424	MAG: nucleotidyltransferase family protein	bin13.ctg68176.02560	MAG: nucleotidyltransferase family protein				0
bin11.ctg196704.02499	photosystem II CP43 chlorophyll apoprotein PsbC	bin11.ctg196704.02499	photosystem II CP43 chlorophyll apoprotein PsbC	Photosystems		0.00569
bin11.ctg196704.02583	MAG: CHAT domain-containing protein	bin11.ctg196704.02583	MAG: CHAT domain-containing protein	Defense		1e-05
bin11.ctg196704.02631	MAG: type II toxin-antitoxin system VapC family toxin	bin11.ctg196704.02631	MAG: type II toxin-antitoxin system VapC family toxin	Toxin antitoxin		0
bin11.ctg196704.02682	Uma2 family endonuclease	bin11.ctg196704.02682	Uma2 family endonuclease	RNA processing		1e-05
bin11.ctg196704.02721	MAG: DUF2281 domain-containing protein	bin11.ctg196704.02721	MAG: DUF2281 domain-containing protein	Unknown		1e-05
bin11.ctg196704.02721	MAG: DUF2281 domain-containing protein	bin13.ctg68176.02841	Protein of unknown function (DUF2281)	Unknown			0.00026
bin11.ctg196704.02759	hypothetical protein	bin11.ctg196704.02759	hypothetical protein	Hypothetical protein		0.00013
bin11.ctg196704.02801	hypothetical protein E1H12_14135	bin11.ctg196704.02801	hypothetical protein E1H12_14135	Hypothetical protein		1e-05
bin11.ctg196704.02846	MAG: 3-dehydroquinate synthase	bin11.ctg196704.02846	MAG: 3-dehydroquinate synthase	Precursor: Shikimate/Aromatic		0
bin11.ctg196704.02884	MAG: ribosome biogenesis GTPase YlqF	bin11.ctg196704.02884	MAG: ribosome biogenesis GTPase YlqF	Ribosomal Proteins		0.0001
bin11.ctg196704.02884	MAG: ribosome biogenesis GTPase YlqF	bin26.ctg33596.04363	MAG: ribosome biogenesis GTPase YlqF	Ribosomal Proteins	1e-05
bin11.ctg196704.02884	MAG: ribosome biogenesis GTPase YlqF	bin13.ctg68176.03033	ribosome biogenesis GTPase YlqF	Ribosomal Proteins			0.00033
bin11.ctg196704.03020	HAD-IB family phosphatase	bin11.ctg196704.03020	HAD-IB family phosphatase			0
bin11.ctg196704.03064	MAG: IS630 transposase-related protein	bin11.ctg196704.03064	MAG: IS630 transposase-related protein	Transposase		3e-05
bin11.ctg196704.03064	MAG: IS630 transposase-related protein	bin26.ctg33596.05130
bin11.ctg196704.03064	MAG: IS630 transposase-related protein	bin13.ctg68176.03985	MAG: IS630 transposase-related protein	Transposase			1e-05
bin11.ctg196704.03109	MAG: phosphotransferase	bin11.ctg196704.03109	MAG: phosphotransferase			4e-05
bin11.ctg196704.03145	MAG: pyridoxine 5'-phosphate synthase	bin11.ctg196704.03145	MAG: pyridoxine 5'-phosphate synthase	Cofactor: Pyridoxine (Vitamin B6)		1e-05
bin11.ctg196704.03145	MAG: pyridoxine 5'-phosphate synthase	bin26.ctg33596.04774
bin11.ctg196704.03145	MAG: pyridoxine 5'-phosphate synthase	bin13.ctg68176.03513	pyridoxine 5'-phosphate synthase	Cofactor: Pyridoxine (Vitamin B6)			1e-05
bin11.ctg196704.03182	MAG: UMP kinase	bin11.ctg196704.03182	MAG: UMP kinase	Other elements		5e-05
bin11.ctg196704.03182	MAG: UMP kinase	bin26.ctg33596.04822
bin11.ctg196704.03182	MAG: UMP kinase	bin13.ctg68176.03552	UMP kinase	Other elements			2e-05
bin11.ctg196704.03233	30S ribosomal protein S15	bin11.ctg196704.03233	30S ribosomal protein S15	Ribosomal Proteins		2e-05
bin11.ctg196704.03233	30S ribosomal protein S15	bin26.ctg33596.04891	30S ribosomal protein S15	Ribosomal Proteins	4e-05
bin11.ctg196704.03233	30S ribosomal protein S15	bin13.ctg68176.03610	30S ribosomal protein S15	Ribosomal Proteins			3e-05
bin11.ctg196704.03290	MAG: radical SAM protein	bin11.ctg196704.03290	MAG: radical SAM protein	Ribosomally synthesized and post-translationally modified peptide		0
bin11.ctg196704.03290	MAG: radical SAM protein	bin26.ctg33596.04982
bin11.ctg196704.03290	MAG: radical SAM protein	bin13.ctg68176.03717	MAG: radical SAM protein	Ribosomally synthesized and post-translationally modified peptide			0
bin11.ctg196704.03330		bin11.ctg196704.03330				2e-05
bin11.ctg196704.03367	MAG: ABC transporter ATP-binding protein/permease	bin11.ctg196704.03367	MAG: ABC transporter ATP-binding protein/permease	Regulatory & Transport Genes		0
bin11.ctg196704.03367	MAG: ABC transporter ATP-binding protein/permease	bin26.ctg33596.05058
bin11.ctg196704.03367	MAG: ABC transporter ATP-binding protein/permease	bin13.ctg68176.03796	MAG: ABC transporter ATP-binding protein/permease	Regulatory & Transport Genes			0
bin11.ctg196704.03546	response regulator transcription factor	bin11.ctg196704.03546	response regulator transcription factor	Stress response		1e-05
bin11.ctg196704.03546	response regulator transcription factor	bin26.ctg33596.04640
bin11.ctg196704.03546	response regulator transcription factor	bin13.ctg68176.03389	response regulator transcription factor	Stress response			2e-05
bin11.ctg196704.03748	sulfotransferase family protein	bin11.ctg196704.03748	sulfotransferase family protein	Methylation		0
bin11.ctg196704.03822	glycosyltransferase 61 family protein	bin11.ctg196704.03822	glycosyltransferase 61 family protein	Modifying enzymes		0
bin11.ctg196704.03860	MAG: acyl-CoA thioesterase	bin11.ctg196704.03860	MAG: acyl-CoA thioesterase	tRNA-dependent cyclodipeptide synthases		0.0001
bin11.ctg196704.03860	MAG: acyl-CoA thioesterase	bin13.ctg68176.03889	acyl-CoA thioesterase	tRNA-dependent cyclodipeptide synthases			3e-05
bin11.ctg196704.03860	MAG: acyl-CoA thioesterase	bin26.ctg33596.05276
bin11.ctg196704.03901	DUF2949 domain-containing protein	bin11.ctg196704.03901	DUF2949 domain-containing protein	Unknown		0.00339
bin11.ctg196704.03901	DUF2949 domain-containing protein	bin13.ctg68176.04462	DUF2949 domain-containing protein	Unknown			0.00035
bin11.ctg196704.03901	DUF2949 domain-containing protein	bin26.ctg33596.00149	MAG: DUF2949 domain-containing protein	Unknown	0.00099
bin11.ctg196704.03901	DUF2949 domain-containing protein	bin13.ctg57649.00025	DUF2949 domain-containing protein	Unknown			0.00035
bin11.ctg196704.03943	hypothetical protein	bin11.ctg196704.03943	hypothetical protein	Hypothetical protein		0
bin11.ctg196704.04016	peptide chain release factor 2	bin11.ctg196704.04016	peptide chain release factor 2			1e-05
bin11.ctg196704.04105	sulfurtransferase TusA family protein	bin11.ctg196704.04105	sulfurtransferase TusA family protein	Nitrogen cycle		7e-05
bin11.ctg196704.04140	gamma-glutamylcyclotransferase	bin11.ctg196704.04140	gamma-glutamylcyclotransferase	Defense		3e-05
bin11.ctg196704.04190	photosystem II reaction center protein PsbH	bin11.ctg196704.04190	photosystem II reaction center protein PsbH	Photosystems		0.0013
bin11.ctg196704.04190	photosystem II reaction center protein PsbH	bin26.ctg33596.05464	photosystem II reaction center protein PsbH	Photosystems	0.00024
bin11.ctg196704.04190	photosystem II reaction center protein PsbH	bin13.ctg68176.04222	photosystem II reaction center protein PsbH	Photosystems			0.00041
bin13.ctg68160.01677		bin13.ctg68160.01677					9e-05
bin13.ctg68160.01718	ATP-binding protein	bin13.ctg68160.01718	ATP-binding protein				0
bin13.ctg68160.01812	site-2 protease family protein	bin13.ctg68160.01812	site-2 protease family protein	Stress response			3e-05
bin13.ctg68160.01851	DUF2142 domain-containing protein	bin13.ctg68160.01851	DUF2142 domain-containing protein	Unknown			0
bin13.ctg68160.01851	DUF2142 domain-containing protein	bin26.ctg33596.03072
bin13.ctg68160.01903	GNAT family N-acetyltransferase	bin13.ctg68160.01903	GNAT family N-acetyltransferase	Cofactor: Pantothenate/CoA			1e-05
bin13.ctg68160.02026	GAF domain-containing protein	bin13.ctg68160.02026	GAF domain-containing protein				1e-05
bin13.ctg68160.02076	chlorophyll a/b-binding protein	bin13.ctg68160.02076	chlorophyll a/b-binding protein	Photosystems			5e-05
bin13.ctg68160.02117	MAG: NUDIX domain-containing protein	bin13.ctg68160.02117	MAG: NUDIX domain-containing protein				1e-05
bin13.ctg68160.02153	MAG: hypothetical protein M1G31_31680	bin13.ctg68160.02153	MAG: hypothetical protein M1G31_31680	Hypothetical protein			6e-05
bin13.ctg68176.02434	aspartate ammonia-lyase	bin13.ctg68176.02434	aspartate ammonia-lyase				1e-05
bin13.ctg68176.02434	aspartate ammonia-lyase	bin26.ctg33596.03571
bin13.ctg68176.02434	aspartate ammonia-lyase	bin11.ctg196704.02339	aspartate ammonia-lyase			0
bin13.ctg68176.02434	aspartate ammonia-lyase	bin11.ctg187240.00265	aspartate ammonia-lyase			0
bin13.ctg68176.02434	aspartate ammonia-lyase	bin13.ctg68160.02367	aspartate ammonia-lyase				1e-05
bin13.ctg68176.02516	glycosyltransferase	bin13.ctg68176.02516	glycosyltransferase	Modifying enzymes			0
bin13.ctg68176.02595	YciI family protein	bin13.ctg68176.02595	YciI family protein				1e-05
bin13.ctg68176.02774	serpin family protein	bin13.ctg68176.02774	serpin family protein				0
bin13.ctg68176.02819	translation initiation factor	bin13.ctg68176.02819	translation initiation factor	Ribosomal Proteins			1e-05
bin13.ctg68176.02855	MAG TPA: hypothetical protein DCS91_19220	bin13.ctg68176.02855	MAG TPA: hypothetical protein DCS91_19220	Hypothetical protein			0
bin13.ctg68176.02901	MAG: class I SAM-dependent methyltransferase	bin13.ctg68176.02901	MAG: class I SAM-dependent methyltransferase	Methylation			0
bin13.ctg68176.02942	CRISPR-associated endonuclease Cas2	bin13.ctg68176.02942	CRISPR-associated endonuclease Cas2	Defense			0
bin13.ctg68176.02992	MAG: formylglycine-generating enzyme family protein	bin13.ctg68176.02992	MAG: formylglycine-generating enzyme family protein				0
bin13.ctg68176.03129	hypothetical protein EYR95_02190	bin13.ctg68176.03129	hypothetical protein EYR95_02190	Hypothetical protein			0
bin13.ctg68176.03168	CapA family protein	bin13.ctg68176.03168	CapA family protein				1e-05
bin13.ctg68176.03168	CapA family protein	bin26.ctg33596.04408
bin13.ctg68176.03203	2-amino-4-hydroxy-6-hydroxymethyldihydropteridine diphosphokinase	bin13.ctg68176.03203	2-amino-4-hydroxy-6-hydroxymethyldihydropteridine diphosphokinase	Cofactor: Folates			0
bin13.ctg68176.03243	DUF2059 domain-containing protein	bin13.ctg68176.03243	DUF2059 domain-containing protein	Unknown			1e-05
bin13.ctg68176.03279	cation:proton antiporter	bin13.ctg68176.03279	cation:proton antiporter	Transport			0
bin13.ctg68176.03317	tetratricopeptide repeat protein	bin13.ctg68176.03317	tetratricopeptide repeat protein	Defense			1e-05
bin13.ctg68176.03370	sulfate ABC transporter permease subunit CysW	bin13.ctg68176.03370	sulfate ABC transporter permease subunit CysW	Regulatory & Transport Genes			0
bin13.ctg68176.03405	phosphonate ABC transporter, permease protein PhnE	bin13.ctg68176.03405	phosphonate ABC transporter, permease protein PhnE	Regulatory & Transport Genes			0
bin13.ctg68176.03448	bacterioferritin	bin13.ctg68176.03448	bacterioferritin	Iron storage			1e-05
bin13.ctg68176.03500	response regulator	bin13.ctg68176.03500	response regulator	Stress response			7e-05
bin13.ctg68176.03500	response regulator	bin11.ctg196704.03131	response regulator	Stress response		0.00011
bin13.ctg68176.03500	response regulator	bin26.ctg33596.04760
bin13.ctg68176.03589		bin13.ctg68176.03589					0.00011
bin13.ctg68176.03635	MAG: membrane protein insertion efficiency factor YidD	bin13.ctg68176.03635	MAG: membrane protein insertion efficiency factor YidD				1e-05
bin13.ctg68176.03743	MAG: phosphohistidine phosphatase SixA	bin13.ctg68176.03743	MAG: phosphohistidine phosphatase SixA	Regulatory & Transport Genes			0.0001
bin13.ctg68176.03781	MAG: chromophore lyase CpcT/CpeT	bin13.ctg68176.03781	MAG: chromophore lyase CpcT/CpeT				1e-05
bin13.ctg68176.03819	MAG: IS66 family transposase	bin13.ctg68176.03819	MAG: IS66 family transposase	Transposase			0
bin13.ctg68176.03857	class I SAM-dependent methyltransferase	bin13.ctg68176.03857	class I SAM-dependent methyltransferase	Methylation			1e-05
bin13.ctg68176.03903	glutathione S-transferase family protein	bin13.ctg68176.03903	glutathione S-transferase family protein	tRNA-dependent cyclodipeptide synthases			1e-05
bin13.ctg68176.03944	hypothetical protein	bin13.ctg68176.03944	hypothetical protein	Hypothetical protein			9e-05
bin13.ctg68176.03987	hypothetical protein HLUCCO16_15765	bin13.ctg68176.03987	hypothetical protein HLUCCO16_15765	Hypothetical protein			0
bin13.ctg68176.04031	MAG: sulfotransferase domain-containing protein	bin13.ctg68176.04031	MAG: sulfotransferase domain-containing protein	Methylation			0
bin13.ctg68176.04074	bifunctional orotidine-5'-phosphate decarboxylase/orotate phosphoribosyltransferase	bin13.ctg68176.04074	bifunctional orotidine-5'-phosphate decarboxylase/orotate phosphoribosyltransferase	Cofactor: Riboflavin (Vitamin B2)			1e-05
bin13.ctg68176.04121	ammonium transporter	bin13.ctg68176.04121	ammonium transporter	Transport			0
bin13.ctg68176.04257	riboflavin synthase	bin13.ctg68176.04257	riboflavin synthase	Cofactor: Riboflavin (Vitamin B2)			3e-05
bin13.ctg68176.04301	type IV pilus twitching motility protein PilT	bin13.ctg68176.04301	type IV pilus twitching motility protein PilT	Motility			2e-05
bin13.ctg68176.04301	type IV pilus twitching motility protein PilT	bin26.ctg33596.05536	type IV pilus twitching motility protein PilT	Motility	3e-05
bin13.ctg68176.04512		bin13.ctg68176.04512					2e-05
bin13.ctg68176.04512		bin11.ctg196704.04359				2e-05
bin13.ctg68176.04556	glycosyltransferase family 4 protein	bin13.ctg68176.04556	glycosyltransferase family 4 protein	Modifying enzymes			1e-05
bin13.ctg68176.04608	histidine kinase	bin13.ctg68176.04608	histidine kinase	Regulatory & Transport Genes			3e-05
bin13.ctg68176.04736	DUF760 domain-containing protein	bin13.ctg68176.04736	DUF760 domain-containing protein	Unknown			0.00017
bin13.ctg68176.04821	tetratricopeptide repeat protein	bin13.ctg68176.04821	tetratricopeptide repeat protein	Defense			1e-05
bin13.ctg68176.04862		bin13.ctg68176.04862					0
bin13.ctg68176.04902	heterocyst frequency control protein PatD	bin13.ctg68176.04902	heterocyst frequency control protein PatD	Ribosomally synthesized and post-translationally modified peptide			0
bin13.ctg68176.04949	NUDIX hydrolase	bin13.ctg68176.04949	NUDIX hydrolase	Modifying enzymes			0
bin13.ctg68176.05002	type I-D CRISPR-associated protein Cas10d/Csc3	bin13.ctg68176.05002	type I-D CRISPR-associated protein Cas10d/Csc3	Defense			0
bin13.ctg68176.05047	class I SAM-dependent methyltransferase	bin13.ctg68176.05047	class I SAM-dependent methyltransferase	Methylation			0
bin13.ctg68176.05137		bin13.ctg68176.05137					0
bin13.ctg68176.05176	HEAT repeat domain-containing protein	bin13.ctg68176.05176	HEAT repeat domain-containing protein	Stress response			2e-05
bin13.ctg68176.05223	UDP-glucose/GDP-mannose dehydrogenase family protein	bin13.ctg68176.05223	UDP-glucose/GDP-mannose dehydrogenase family protein	Cofactor: Others			2e-05
bin13.ctg68176.05275		bin13.ctg68176.05275					0
bin13.ctg68176.05336	hypothetical protein	bin13.ctg68176.05336	hypothetical protein	Hypothetical protein			0
bin13.ctg68176.05378	hypothetical protein	bin13.ctg68176.05378	hypothetical protein	Hypothetical protein			1e-05
bin13.ctg68176.05419		bin13.ctg68176.05419					0.0003
bin13.ctg68176.05459	MAG: 2-C-methyl-D-erythritol 4-phosphate cytidylyltransferase	bin13.ctg68176.05459	MAG: 2-C-methyl-D-erythritol 4-phosphate cytidylyltransferase	Terpenoids			0
bin13.ctg68176.05459	MAG: 2-C-methyl-D-erythritol 4-phosphate cytidylyltransferase	bin26.ctg33596.01027
bin13.ctg68176.05459	MAG: 2-C-methyl-D-erythritol 4-phosphate cytidylyltransferase	bin11.ctg196704.05123	MAG: 2-C-methyl-D-erythritol 4-phosphate cytidylyltransferase	Terpenoids		0
bin13.ctg68176.05507	MAG: hypothetical protein JWS08_21615	bin13.ctg68176.05507	MAG: hypothetical protein JWS08_21615	Hypothetical protein			1e-05
bin13.ctg68176.05596	manganese efflux pump MntP family protein	bin13.ctg68176.05596	manganese efflux pump MntP family protein	Regulatory & Transport Genes			0
bin13.ctg68176.05636	WD40 repeat protein	bin13.ctg68176.05636	WD40 repeat protein				0
bin13.ctg68176.05674	ribonuclease III	bin13.ctg68176.05674	ribonuclease III	RNA processing			1e-05
bin13.ctg68176.05716	MAG: recombinase family protein	bin13.ctg68176.05716	MAG: recombinase family protein	Defense			0
bin26.ctg33596.00117		bin26.ctg33596.00117
bin26.ctg33596.00152		bin26.ctg33596.00152
bin26.ctg33596.00283		bin26.ctg33596.00283
bin26.ctg33596.00322		bin26.ctg33596.00322
bin11.ctg196704.02998	PAS domain S-box protein	bin11.ctg196704.02998	PAS domain S-box protein	Regulatory & Transport Genes		0.00018
bin11.ctg196704.03164	MAG: N-acetylmuramoyl-L-alanine amidase	bin11.ctg196704.03164	MAG: N-acetylmuramoyl-L-alanine amidase	Cell wall		1e-05
bin11.ctg196704.03262	MAG: methyltransferase domain-containing protein	bin11.ctg196704.03262	MAG: methyltransferase domain-containing protein	Methylation		0
bin11.ctg196704.03262	MAG: methyltransferase domain-containing protein	bin26.ctg33596.04921
bin11.ctg196704.03313	sulfate/molybdate ABC transporter ATP-binding protein	bin11.ctg196704.03313	sulfate/molybdate ABC transporter ATP-binding protein	Regulatory & Transport Genes		0
bin11.ctg196704.03313	sulfate/molybdate ABC transporter ATP-binding protein	bin26.ctg33596.05005
bin11.ctg196704.03346	MAG: tetratricopeptide repeat protein	bin11.ctg196704.03346	MAG: tetratricopeptide repeat protein	Defense		1e-05
bin11.ctg196704.03346	MAG: tetratricopeptide repeat protein	bin26.ctg33596.05039	MAG: tetratricopeptide repeat protein	Defense	2e-05
bin11.ctg196704.03390	MAG: efflux RND transporter periplasmic adaptor subunit	bin11.ctg196704.03390	MAG: efflux RND transporter periplasmic adaptor subunit	Transport		2e-05
bin11.ctg196704.03390	MAG: efflux RND transporter periplasmic adaptor subunit	bin26.ctg33596.05076
bin11.ctg196704.03520		bin11.ctg196704.03520				0
bin11.ctg196704.03567		bin11.ctg196704.03567				2e-05
bin11.ctg196704.03612	tetratricopeptide repeat protein	bin11.ctg196704.03612	tetratricopeptide repeat protein	Defense		1e-05
bin11.ctg196704.03731	MAG: deoxyribodipyrimidine photo-lyase	bin11.ctg196704.03731	MAG: deoxyribodipyrimidine photo-lyase	Defense		0
bin11.ctg196704.03731	MAG: deoxyribodipyrimidine photo-lyase	bin26.ctg33596.04451
bin11.ctg196704.03842	MAG: hypothetical protein JWS08_15985	bin11.ctg196704.03842	MAG: hypothetical protein JWS08_15985	Hypothetical protein		1e-05
bin11.ctg196704.03884	MAG: hypothetical protein KME12_03570	bin11.ctg196704.03884	MAG: hypothetical protein KME12_03570	Hypothetical protein		1e-05
bin11.ctg196704.03927	MAG: DNA polymerase III subunit alpha	bin11.ctg196704.03927	MAG: DNA polymerase III subunit alpha	Cell wall		1e-05
bin11.ctg196704.03927	MAG: DNA polymerase III subunit alpha	bin13.ctg68176.04416	DNA polymerase III subunit alpha	Cell wall			0
bin11.ctg196704.03927	MAG: DNA polymerase III subunit alpha	bin26.ctg33596.00067
bin11.ctg196704.03960	MAG: aminotransferase class I/II-fold pyridoxal phosphate-dependent enzyme	bin11.ctg196704.03960	MAG: aminotransferase class I/II-fold pyridoxal phosphate-dependent enzyme	Aminoacid biosynthesis		0.00014
bin11.ctg196704.03960	MAG: aminotransferase class I/II-fold pyridoxal phosphate-dependent enzyme	bin13.ctg68176.04385	aminotransferase class I/II-fold pyridoxal phosphate-dependent enzyme	Aminoacid biosynthesis			5e-05
bin11.ctg196704.03960	MAG: aminotransferase class I/II-fold pyridoxal phosphate-dependent enzyme	bin26.ctg33596.00036	MAG: aminotransferase class I/II-fold pyridoxal phosphate-dependent enzyme	Aminoacid biosynthesis	0
bin11.ctg196704.03998	hypothetical protein	bin11.ctg196704.03998	hypothetical protein	Hypothetical protein		1e-05
bin11.ctg196704.03998	hypothetical protein	bin26.ctg33596.05299
bin11.ctg196704.04084	MAG: hypothetical protein JWS08_17180	bin11.ctg196704.04084	MAG: hypothetical protein JWS08_17180	Hypothetical protein		1e-05
bin11.ctg196704.04123	MAG: YihY/virulence factor BrkB family protein	bin11.ctg196704.04123	MAG: YihY/virulence factor BrkB family protein	Defense		2e-05
bin11.ctg196704.04171	MAG: DUF3084 domain-containing protein	bin11.ctg196704.04171	MAG: DUF3084 domain-containing protein	Unknown		1e-05
bin11.ctg196704.04213	MAG: DUF3067 family protein	bin11.ctg196704.04213	MAG: DUF3067 family protein	Unknown		1e-05
bin11.ctg196704.04255	class I SAM-dependent methyltransferase	bin11.ctg196704.04255	class I SAM-dependent methyltransferase	Methylation		4e-05
bin11.ctg196704.04255	class I SAM-dependent methyltransferase	bin11.ctg189506.00323	class I SAM-dependent methyltransferase	Methylation		4e-05
bin11.ctg196704.04292	class I SAM-dependent DNA methyltransferase	bin11.ctg196704.04292	class I SAM-dependent DNA methyltransferase	Methylation		0
bin11.ctg196704.04333	MAG: DUF262 domain-containing protein	bin11.ctg196704.04333	MAG: DUF262 domain-containing protein	Unknown		0
bin11.ctg196704.04333	MAG: DUF262 domain-containing protein	bin26.ctg33596.00558
bin11.ctg196704.04373	MAG: F420-0:Gamma-glutamyl ligase	bin11.ctg196704.04373	MAG: F420-0:Gamma-glutamyl ligase	Cofactor: Coenzyme F420		0
bin11.ctg196704.04373	MAG: F420-0:Gamma-glutamyl ligase	bin26.ctg33596.00113
bin11.ctg196704.04456	MAG: DUF2281 domain-containing protein	bin11.ctg196704.04456	MAG: DUF2281 domain-containing protein	Unknown		0
bin11.ctg196704.04504		bin11.ctg196704.04504				0
bin11.ctg196704.04550	MAG: glycosyltransferase family 2 protein	bin11.ctg196704.04550	MAG: glycosyltransferase family 2 protein	Modifying enzymes		0
bin11.ctg196704.04586	acetyl-CoA carboxylase biotin carboxyl carrier protein	bin11.ctg196704.04586	acetyl-CoA carboxylase biotin carboxyl carrier protein	Citric acid		3e-05
bin11.ctg196704.04698	MAG: hypothetical protein JWS08_17815	bin11.ctg196704.04698	MAG: hypothetical protein JWS08_17815	Hypothetical protein		0
bin11.ctg196704.04698	MAG: hypothetical protein JWS08_17815	bin26.ctg33596.00112
bin11.ctg196704.04739	DUF305 domain-containing protein	bin11.ctg196704.04739	DUF305 domain-containing protein	Unknown		0.00012
bin11.ctg196704.04739	DUF305 domain-containing protein	bin26.ctg33596.00185	DUF305 domain-containing protein	Unknown	2e-05
bin11.ctg196704.04783	MAG: TPM domain-containing protein	bin11.ctg196704.04783	MAG: TPM domain-containing protein			3e-05
bin11.ctg196704.04783	MAG: TPM domain-containing protein	bin26.ctg33596.00234
bin11.ctg196704.04783	MAG: TPM domain-containing protein	bin13.ctg68176.04973	TPM domain-containing protein				2e-05
bin11.ctg196704.04826	MAG: hypothetical protein JWS08_19830	bin11.ctg196704.04826	MAG: hypothetical protein JWS08_19830	Hypothetical protein		3e-05
bin11.ctg196704.04826	MAG: hypothetical protein JWS08_19830	bin26.ctg33596.00602
bin11.ctg196704.04873	MAG: hypothetical protein JWS08_20035	bin11.ctg196704.04873	MAG: hypothetical protein JWS08_20035	Hypothetical protein		0.00015
bin11.ctg196704.04921	EAL domain-containing protein	bin11.ctg196704.04921	EAL domain-containing protein	Regulatory & Transport Genes		0
bin11.ctg196704.05051	MAG: DUF4382 domain-containing protein	bin11.ctg196704.05051	MAG: DUF4382 domain-containing protein	Unknown		3e-05
bin11.ctg196704.05142	MAG: 1-(5-phosphoribosyl)-5-	bin11.ctg196704.05142	MAG: 1-(5-phosphoribosyl)-5-			1e-05
bin11.ctg196704.05142	MAG: 1-(5-phosphoribosyl)-5-	bin13.ctg68176.05489	1-(5-phosphoribosyl)-5-				1e-05
bin11.ctg196704.05142	MAG: 1-(5-phosphoribosyl)-5-	bin26.ctg33596.01052
bin11.ctg196704.05220	MAG: hypothetical protein JWS08_21255	bin11.ctg196704.05220	MAG: hypothetical protein JWS08_21255	Hypothetical protein		3e-05
bin11.ctg196704.05220	MAG: hypothetical protein JWS08_21255	bin26.ctg33596.00975
bin11.ctg196704.05271	MAG: YdcF family protein	bin11.ctg196704.05271	MAG: YdcF family protein			1e-05
bin11.ctg196704.05271	MAG: YdcF family protein	bin26.ctg33596.00934
bin11.ctg196704.05358	hypothetical protein E1H12_01460	bin11.ctg196704.05358	hypothetical protein E1H12_01460	Hypothetical protein		3e-05
bin11.ctg196704.05449	MAG: lmo0937 family membrane protein	bin11.ctg196704.05449	MAG: lmo0937 family membrane protein			0
bin11.ctg196704.05449	MAG: lmo0937 family membrane protein	bin26.ctg33596.01222
bin11.ctg196704.05521	MAG: glycosyltransferase	bin11.ctg196704.05521	MAG: glycosyltransferase	Modifying enzymes		1e-05
bin11.ctg196704.05607	hypothetical protein BCD67_23605	bin11.ctg196704.05607	hypothetical protein BCD67_23605	Hypothetical protein		0
bin11.ctg196704.05683	hypothetical protein	bin11.ctg196704.05683	hypothetical protein	Hypothetical protein		5e-05
bin11.ctg196704.05764	toxin-antitoxin system HicB family antitoxin	bin11.ctg196704.05764	toxin-antitoxin system HicB family antitoxin	Toxin antitoxin		8e-05
bin11.ctg196704.05809	hypothetical protein	bin11.ctg196704.05809	hypothetical protein	Hypothetical protein		1e-05
bin11.ctg196704.05845	Laminin Domain II	bin11.ctg196704.05845	Laminin Domain II			1e-05
bin11.ctg196704.05894	MAG: photosystem II chlorophyll-binding protein CP47	bin11.ctg196704.05894	MAG: photosystem II chlorophyll-binding protein CP47	Photosystems		0.00121
bin11.ctg196704.05894	MAG: photosystem II chlorophyll-binding protein CP47	bin13.ctg68139.00255	photosystem II chlorophyll-binding protein CP47	Photosystems			0.00109
bin11.ctg196704.05894	MAG: photosystem II chlorophyll-binding protein CP47	bin26.ctg33596.01669	MAG: photosystem II chlorophyll-binding protein CP47	Photosystems	0.00113
bin11.ctg30995.05953	MAG: TldD/PmbA family protein	bin11.ctg30995.05953	MAG: TldD/PmbA family protein	Ribosomally synthesized and post-translationally modified peptide		2e-05
bin11.ctg56493.05993	MAG: glycoside hydrolase family 13 protein	bin11.ctg56493.05993	MAG: glycoside hydrolase family 13 protein	Modifying enzymes		0
bin11.ctg84154.06028	hypothetical protein	bin11.ctg84154.06028	hypothetical protein	Hypothetical protein		0
bin13.ctg68139.00034	hypothetical protein	bin13.ctg68139.00034	hypothetical protein	Hypothetical protein			0
bin13.ctg68139.00075	sulfite exporter TauE/SafE family protein	bin13.ctg68139.00075	sulfite exporter TauE/SafE family protein	Sulfur cycle			0.00028
bin13.ctg68139.00113	MAG: DUF58 domain-containing protein	bin13.ctg68139.00113	MAG: DUF58 domain-containing protein	Unknown			2e-05
bin13.ctg68139.00113	MAG: DUF58 domain-containing protein	bin26.ctg33596.01425	MAG: DUF58 domain-containing protein	Unknown	3e-05
bin13.ctg68139.00155		bin13.ctg68139.00155					1e-05
bin13.ctg68139.00155		bin11.ctg196704.05594				0
bin13.ctg68139.00194	hypothetical protein	bin13.ctg68139.00194	hypothetical protein	Hypothetical protein			2e-05
bin13.ctg68139.00251	PAS domain S-box protein	bin13.ctg68139.00251	PAS domain S-box protein	Regulatory & Transport Genes			1e-05
bin13.ctg68139.00311	6,7-dimethyl-8-ribityllumazine synthase	bin13.ctg68139.00311	6,7-dimethyl-8-ribityllumazine synthase	Cofactor: Riboflavin (Vitamin B2)			0.00044
bin13.ctg68139.00399	hypothetical protein	bin13.ctg68139.00399	hypothetical protein	Hypothetical protein			0.00011
bin13.ctg68139.00442	M28 family peptidase	bin13.ctg68139.00442	M28 family peptidase	Ribosomally synthesized and post-translationally modified peptide			9e-05
bin13.ctg68139.00535	DUF4065 domain-containing protein	bin13.ctg68139.00535	DUF4065 domain-containing protein	Unknown			1e-05
bin13.ctg68139.00590	MAG: DUF4126 family protein	bin13.ctg68139.00590	MAG: DUF4126 family protein	Unknown			8e-05
bin13.ctg68139.00590	MAG: DUF4126 family protein	bin11.ctg196704.00588	MAG: DUF4126 family protein	Unknown		0.00016
bin13.ctg68139.00590	MAG: DUF4126 family protein	bin26.ctg33596.01981	MAG: DUF4126 family protein	Unknown	1e-05
bin13.ctg68139.00710	F0F1 ATP synthase subunit B'	bin13.ctg68139.00710	F0F1 ATP synthase subunit B'	Respiration			0.00028
bin13.ctg68139.00751	hypothetical protein	bin13.ctg68139.00751	hypothetical protein	Hypothetical protein			0
bin13.ctg68139.00803	chemotaxis protein CheW	bin13.ctg68139.00803	chemotaxis protein CheW	Motility			0.00038
bin13.ctg68139.00844	sulfotransferase domain-containing protein	bin13.ctg68139.00844	sulfotransferase domain-containing protein	Methylation			0
bin13.ctg68139.00883	hypothetical protein HLUCCO16_11795	bin13.ctg68139.00883	hypothetical protein HLUCCO16_11795	Hypothetical protein			0
bin13.ctg68139.00883	hypothetical protein HLUCCO16_11795	bin11.ctg196704.00808	hypothetical protein HLUCCO16_11795	Hypothetical protein		0
bin13.ctg68160.01008	MAG: DUF2811 domain-containing protein	bin13.ctg68160.01008	MAG: DUF2811 domain-containing protein	Unknown			2e-05
bin13.ctg68160.01008	MAG: DUF2811 domain-containing protein	bin11.ctg196704.00832	MAG: DUF2811 domain-containing protein	Unknown		1e-05
bin13.ctg68160.01008	MAG: DUF2811 domain-containing protein	bin26.ctg33596.02227
bin13.ctg68160.01109	SIMPL domain-containing protein	bin13.ctg68160.01109	SIMPL domain-containing protein				1e-05
bin11.ctg196704.02490	DUF177 domain-containing protein	bin11.ctg196704.02490	DUF177 domain-containing protein	Unknown		2e-05
bin11.ctg196704.02569	MAG: Uma2 family endonuclease	bin11.ctg196704.02569	MAG: Uma2 family endonuclease	RNA processing		0
bin11.ctg196704.02569	MAG: Uma2 family endonuclease	bin26.ctg33596.03835
bin11.ctg196704.02623	MAG: hypothetical protein JWS08_11310	bin11.ctg196704.02623	MAG: hypothetical protein JWS08_11310	Hypothetical protein		0.00039
bin11.ctg196704.02623	MAG: hypothetical protein JWS08_11310	bin26.ctg33596.03879	MAG: hypothetical protein JWS08_11310	Hypothetical protein	0.00012
bin11.ctg196704.02672	MAG: glycosyltransferase	bin11.ctg196704.02672	MAG: glycosyltransferase	Modifying enzymes		0
bin11.ctg196704.02672	MAG: glycosyltransferase	bin26.ctg33596.03925
bin11.ctg196704.02710	HAMP domain-containing protein	bin11.ctg196704.02710	HAMP domain-containing protein	Regulatory & Transport Genes		1e-05
bin11.ctg196704.02710	HAMP domain-containing protein	bin26.ctg33596.03964
bin11.ctg196704.02751	putative rhamnosyl transferase	bin11.ctg196704.02751	putative rhamnosyl transferase			1e-05
bin11.ctg196704.02791		bin11.ctg196704.02791				2e-05
bin11.ctg196704.02831	MAG: serine/threonine protein kinase	bin11.ctg196704.02831	MAG: serine/threonine protein kinase	Aminoacid biosynthesis		2e-05
bin11.ctg196704.02876	MAG: histidine kinase	bin11.ctg196704.02876	MAG: histidine kinase	Regulatory & Transport Genes		1e-05
bin11.ctg196704.02974	MAG: family 10 glycosylhydrolase	bin11.ctg196704.02974	MAG: family 10 glycosylhydrolase	Modifying enzymes		2e-05
bin11.ctg196704.02974	MAG: family 10 glycosylhydrolase	bin26.ctg33596.04291	MAG: family 10 glycosylhydrolase	Modifying enzymes	2e-05
bin11.ctg196704.03007		bin11.ctg196704.03007				1e-05
bin11.ctg196704.03055	MAG: translocation/assembly module TamB domain-containing protein	bin11.ctg196704.03055	MAG: translocation/assembly module TamB domain-containing protein	Transport		1e-05
bin11.ctg196704.03055	MAG: translocation/assembly module TamB domain-containing protein	bin26.ctg33596.05122	MAG: translocation/assembly module TamB domain-containing protein	Transport	0
bin11.ctg196704.03098		bin11.ctg196704.03098				0
bin11.ctg196704.03098		bin26.ctg33596.04718
bin11.ctg196704.03137	thioredoxin family protein	bin11.ctg196704.03137	thioredoxin family protein	Stress response		0.00067
bin11.ctg196704.03172	histidine kinase	bin11.ctg196704.03172	histidine kinase	Regulatory & Transport Genes		1e-05
bin11.ctg196704.03220	MAG: CRISPR-associated endonuclease Cas1	bin11.ctg196704.03220	MAG: CRISPR-associated endonuclease Cas1	Defense		0
bin11.ctg196704.03277	MAG: CRISPR-associated endoribonuclease Cas6	bin11.ctg196704.03277	MAG: CRISPR-associated endoribonuclease Cas6	Defense		0
bin11.ctg196704.03277	MAG: CRISPR-associated endoribonuclease Cas6	bin26.ctg33596.04969	MAG: CRISPR-associated endoribonuclease Cas6	Defense	1e-05
bin11.ctg196704.03277	MAG: CRISPR-associated endoribonuclease Cas6	bin13.ctg68176.03702	MAG: CRISPR-associated endoribonuclease Cas6	Defense			0
bin11.ctg196704.03321	MAG: D-alanyl-D-alanine carboxypeptidase	bin11.ctg196704.03321	MAG: D-alanyl-D-alanine carboxypeptidase	Cell wall		0
bin11.ctg196704.03358		bin11.ctg196704.03358				0.0001
bin11.ctg196704.03358		bin26.ctg33596.05050
bin11.ctg196704.03405	DALR anticodon-binding domain-containing protein	bin11.ctg196704.03405	DALR anticodon-binding domain-containing protein			5e-05
bin11.ctg196704.03449	Dam family site-specific DNA-(adenine-N6)-methyltransferase	bin11.ctg196704.03449	Dam family site-specific DNA-(adenine-N6)-methyltransferase	Methylation		0
bin11.ctg196704.03487	molecular chaperone GroEL	bin11.ctg196704.03487	molecular chaperone GroEL	Stress response		0.00028
bin11.ctg196704.03487	molecular chaperone GroEL	bin26.ctg33596.05139	MAG: chaperonin GroEL	Stress response	6e-05
bin11.ctg196704.03487	molecular chaperone GroEL	bin13.ctg68176.03995	MAG: chaperonin GroEL	Stress response			0.00028
bin11.ctg196704.03575	MAG: HEAT repeat domain-containing protein	bin11.ctg196704.03575	MAG: HEAT repeat domain-containing protein	Stress response		0.0001
bin11.ctg196704.03575	MAG: HEAT repeat domain-containing protein	bin26.ctg33596.04611
bin11.ctg196704.03620	MAG: peptidoglycan-binding protein	bin11.ctg196704.03620	MAG: peptidoglycan-binding protein	Cell wall		0.00011
bin11.ctg196704.03658	MAG: hypothetical protein JWS08_13460	bin11.ctg196704.03658	MAG: hypothetical protein JWS08_13460	Hypothetical protein		0.00017
bin11.ctg196704.03699	MAG: SDR family oxidoreductase	bin11.ctg196704.03699	MAG: SDR family oxidoreductase	Modifying enzymes		2e-05
bin11.ctg196704.03699	MAG: SDR family oxidoreductase	bin26.ctg33596.04488	MAG: SDR family oxidoreductase	Modifying enzymes	0.00011
bin11.ctg196704.03740	MAG: pyruvate kinase	bin11.ctg196704.03740	MAG: pyruvate kinase	Glycolysis		2e-05
bin11.ctg196704.03740	MAG: pyruvate kinase	bin13.ctg68176.03197	pyruvate kinase	Glycolysis			1e-05
bin11.ctg196704.03740	MAG: pyruvate kinase	bin26.ctg33596.04442	MAG: pyruvate kinase	Glycolysis	3e-05
bin11.ctg196704.03776	MAG: hypothetical protein JWS08_12995	bin11.ctg196704.03776	MAG: hypothetical protein JWS08_12995	Hypothetical protein		0
bin11.ctg196704.03852	MAG: DUF928 domain-containing protein	bin11.ctg196704.03852	MAG: DUF928 domain-containing protein	Unknown		0.00019
bin11.ctg196704.03852	MAG: DUF928 domain-containing protein	bin26.ctg33596.05267	MAG: DUF928 domain-containing protein	Unknown	8e-05
bin11.ctg196704.03892	GAF domain-containing protein	bin11.ctg196704.03892	GAF domain-containing protein			0
bin11.ctg196704.03935	putative Zn peptidase	bin11.ctg196704.03935	putative Zn peptidase			0
bin11.ctg196704.03969	MAG: hypothetical protein JWS08_17480	bin11.ctg196704.03969	MAG: hypothetical protein JWS08_17480	Hypothetical protein		0.00109
bin11.ctg196704.04006	HDIG domain-containing protein	bin11.ctg196704.04006	HDIG domain-containing protein			2e-05
bin11.ctg196704.04053	MAG: DNA sulfur modification protein DndE	bin11.ctg196704.04053	MAG: DNA sulfur modification protein DndE	Sulfur cycle		0.00021
bin11.ctg196704.04053	MAG: DNA sulfur modification protein DndE	bin26.ctg33596.05576
bin11.ctg196704.04053	MAG: DNA sulfur modification protein DndE	bin13.ctg68176.04341	DNA sulfur modification protein DndE	Sulfur cycle			7e-05
bin11.ctg196704.04093	MAG: anthranilate synthase component I	bin11.ctg196704.04093	MAG: anthranilate synthase component I	Aminoacid biosynthesis		0
bin11.ctg196704.04132	leucine-rich repeat domain-containing protein	bin11.ctg196704.04132	leucine-rich repeat domain-containing protein			2e-05
bin11.ctg196704.04182	MAG: proton extrusion protein PcxA	bin11.ctg196704.04182	MAG: proton extrusion protein PcxA			0
bin11.ctg196704.04182	MAG: proton extrusion protein PcxA	bin26.ctg33596.05473
bin11.ctg196704.04225	MAG: hypothetical protein JWS08_16660	bin11.ctg196704.04225	MAG: hypothetical protein JWS08_16660	Hypothetical protein		1e-05
bin11.ctg196704.04225	MAG: hypothetical protein JWS08_16660	bin26.ctg33596.05430
bin11.ctg196704.04302	MAG: ATPase	bin11.ctg196704.04302	MAG: ATPase			2e-05
bin11.ctg196704.04302	MAG: ATPase	bin26.ctg33596.00531	MAG: ATPase		1e-05
bin11.ctg196704.04342	MAG: hypothetical protein JWS08_19655	bin11.ctg196704.04342	MAG: hypothetical protein JWS08_19655	Hypothetical protein		2e-05
bin11.ctg196704.04342	MAG: hypothetical protein JWS08_19655	bin26.ctg33596.00567
bin11.ctg196704.04514	MAG: HAD-IIB family hydrolase	bin11.ctg196704.04514	MAG: HAD-IIB family hydrolase	Modifying enzymes		1e-05
bin11.ctg196704.04595	MAG: methyl-accepting chemotaxis protein	bin11.ctg196704.04595	MAG: methyl-accepting chemotaxis protein	Motility		2e-05
bin11.ctg196704.04628	lipid-A-disaccharide synthase	bin11.ctg196704.04628	lipid-A-disaccharide synthase	Cell wall		5e-05
bin11.ctg196704.04709	hypothetical protein	bin11.ctg196704.04709	hypothetical protein	Hypothetical protein		1e-05
bin11.ctg196704.04847	NAD-dependent 4,6-dehydratase LegB	bin11.ctg196704.04847	NAD-dependent 4,6-dehydratase LegB	Citric acid		0
bin11.ctg196704.04885	MAG: hypothetical protein JWS08_20070	bin11.ctg196704.04885	MAG: hypothetical protein JWS08_20070	Hypothetical protein		0
bin11.ctg196704.04931	MAG: FAD-dependent oxidoreductase	bin11.ctg196704.04931	MAG: FAD-dependent oxidoreductase	Regulatory & Transport Genes		1e-05
bin11.ctg196704.04931	MAG: FAD-dependent oxidoreductase	bin26.ctg33596.00728
bin11.ctg196704.04973	MAG: hypothetical protein JWS08_20375	bin11.ctg196704.04973	MAG: hypothetical protein JWS08_20375	Hypothetical protein		0
bin11.ctg196704.04973	MAG: hypothetical protein JWS08_20375	bin26.ctg33596.00761
bin11.ctg196704.05019	diacylglycerol kinase (ATP dependent)	bin11.ctg196704.05019	diacylglycerol kinase (ATP dependent)			1e-05
bin11.ctg196704.05019	diacylglycerol kinase (ATP dependent)	bin26.ctg33596.00803
bin11.ctg196704.05065	50S ribosome-binding GTPase	bin11.ctg196704.05065	50S ribosome-binding GTPase			2e-05
bin11.ctg196704.05108		bin11.ctg196704.05108				0
bin11.ctg196704.05280	hypothetical protein E1H12_11200	bin11.ctg196704.05280	hypothetical protein E1H12_11200	Hypothetical protein		3e-05
bin11.ctg196704.05280	hypothetical protein E1H12_11200	bin26.ctg33596.00925	hypothetical protein E1H12_11200	Hypothetical protein	1e-05
bin11.ctg196704.05372	MAG: ribulose bisphosphate carboxylase small subunit	bin11.ctg196704.05372	MAG: ribulose bisphosphate carboxylase small subunit	Carbon fixation		2e-05
bin11.ctg196704.05417	cytochrome b6	bin11.ctg196704.05417	cytochrome b6	Respiration		0.0011
bin11.ctg196704.05417	cytochrome b6	bin26.ctg33596.01246	MAG: cytochrome b6	Respiration	0.00033
bin11.ctg196704.05417	cytochrome b6	bin13.ctg68176.05614	cytochrome b6	Respiration			0.00035
bin11.ctg196704.05458	pentapeptide repeat-containing protein	bin11.ctg196704.05458	pentapeptide repeat-containing protein	Resistance Genes		0.00049
bin11.ctg196704.05577	MAG: urea ABC transporter substrate-binding protein	bin11.ctg196704.05577	MAG: urea ABC transporter substrate-binding protein	Nitrogen cycle		1e-05
bin11.ctg196704.05577	MAG: urea ABC transporter substrate-binding protein	bin26.ctg33596.01450	MAG: urea ABC transporter substrate-binding protein	Nitrogen cycle	0.00014
bin11.ctg196704.05615	MAG: EAL domain-containing protein	bin11.ctg196704.05615	MAG: EAL domain-containing protein	Regulatory & Transport Genes		1e-05
bin11.ctg196704.05691	MAG: tRNA (adenosine(37)-N6)-dimethylallyltransferase MiaA	bin11.ctg196704.05691	MAG: tRNA (adenosine(37)-N6)-dimethylallyltransferase MiaA	tRNA		5e-05
bin11.ctg196704.05734		bin11.ctg196704.05734				0
bin11.ctg196704.05774	MAG: TIGR04283 family arsenosugar biosynthesis glycosyltransferase	bin11.ctg196704.05774	MAG: TIGR04283 family arsenosugar biosynthesis glycosyltransferase	Modifying enzymes		1e-05
bin11.ctg196704.05818	ferredoxin	bin11.ctg196704.05818	ferredoxin	Photosystems		0
bin11.ctg196704.05818	ferredoxin	bin13.ctg68139.00184	MAG: (2Fe-2S) ferredoxin domain-containing protein	Photosystems			0
bin11.ctg196704.05818	ferredoxin	bin26.ctg33596.01512
bin11.ctg47580.05967	HAD family hydrolase	bin11.ctg47580.05967	HAD family hydrolase	Modifying enzymes		0
bin11.ctg62992.06001	subtype III-A CRISPR-associated RAMP protein Csm3	bin11.ctg62992.06001	subtype III-A CRISPR-associated RAMP protein Csm3	Defense		1e-05
bin13.ctg42128.00000	DNA polymerase III subunit alpha	bin13.ctg42128.00000	DNA polymerase III subunit alpha	Cell wall			0
bin13.ctg68139.00088	YccF domain-containing protein	bin13.ctg68139.00088	YccF domain-containing protein				4e-05
bin13.ctg68139.00122	DUF3747 domain-containing protein	bin13.ctg68139.00122	DUF3747 domain-containing protein	Unknown			0.00023
bin13.ctg68139.00164	hypothetical protein B0A82_10430	bin13.ctg68139.00164	hypothetical protein B0A82_10430	Hypothetical protein			3e-05
bin13.ctg68139.00208		bin13.ctg68139.00208					7e-05
bin13.ctg68139.00267	serine/threonine protein kinase	bin13.ctg68139.00267	serine/threonine protein kinase	Aminoacid biosynthesis			1e-05
bin13.ctg68139.00325	hypothetical protein	bin13.ctg68139.00325	hypothetical protein	Hypothetical protein			3e-05
bin13.ctg68139.00364	PIN domain-containing protein	bin13.ctg68139.00364	PIN domain-containing protein	Unknown			1e-05
bin13.ctg68139.00411	glycosyltransferase family 61 protein	bin13.ctg68139.00411	glycosyltransferase family 61 protein	Modifying enzymes			0
bin13.ctg68139.00498	ABC transporter ATP-binding protein/permease	bin13.ctg68139.00498	ABC transporter ATP-binding protein/permease	Regulatory & Transport Genes			0
bin13.ctg68139.00547	SH3 domain-containing protein	bin13.ctg68139.00547	SH3 domain-containing protein	Defense			4e-05
bin26.ctg33596.03261		bin26.ctg33596.03261
bin26.ctg33596.03309		bin26.ctg33596.03309
bin26.ctg33596.03309		bin11.ctg196704.01757	MAG: flavin-dependent dehydrogenase	Cofactor: Others		4e-05
bin26.ctg33596.03434		bin26.ctg33596.03434
bin26.ctg33596.03434		bin11.ctg196704.02007	MAG: hypothetical protein JWS08_09385	Hypothetical protein		6e-05
bin26.ctg33596.03481		bin26.ctg33596.03481			0.00013
bin26.ctg33596.03527		bin26.ctg33596.03527
bin26.ctg33596.03527		bin11.ctg196704.01886	MAG: hypothetical protein JWS08_09730	Hypothetical protein		0
bin26.ctg33596.03603	MAG: DUF2839 family protein	bin26.ctg33596.03603	MAG: DUF2839 family protein	Unknown	9e-05
bin26.ctg33596.03638	MAG: AAA family ATPase	bin26.ctg33596.03638	MAG: AAA family ATPase	Regulatory & Transport Genes	0
bin26.ctg33596.03685	MAG: DUF4114 domain-containing protein	bin26.ctg33596.03685	MAG: DUF4114 domain-containing protein	Unknown	0.00019
bin26.ctg33596.03729	MAG: DUF697 domain-containing protein	bin26.ctg33596.03729	MAG: DUF697 domain-containing protein	Unknown	0.00016
bin26.ctg33596.03729	MAG: DUF697 domain-containing protein	bin11.ctg196704.02462	MAG: DUF697 domain-containing protein	Unknown		0.00019
bin26.ctg33596.03765	MAG: peptidylprolyl isomerase	bin26.ctg33596.03765	MAG: peptidylprolyl isomerase	Stress response	1e-05
bin26.ctg33596.03765	MAG: peptidylprolyl isomerase	bin11.ctg196704.02502	MAG: peptidylprolyl isomerase	Stress response		0.0001
bin26.ctg33596.03847		bin26.ctg33596.03847
bin26.ctg33596.03891		bin26.ctg33596.03891
bin26.ctg33596.03940		bin26.ctg33596.03940
bin26.ctg33596.03977		bin26.ctg33596.03977
bin26.ctg33596.04061	MAG: ATP phosphoribosyltransferase regulatory subunit	bin26.ctg33596.04061	MAG: ATP phosphoribosyltransferase regulatory subunit	Cofactor: Riboflavin (Vitamin B2)	3e-05
bin26.ctg33596.04101	MAG: CHASE2 domain-containing protein	bin26.ctg33596.04101	MAG: CHASE2 domain-containing protein	Stress response	1e-05
bin26.ctg33596.04101	MAG: CHASE2 domain-containing protein	bin11.ctg196704.02838	MAG: CHASE2 domain-containing protein	Stress response		0.00014
bin26.ctg33596.04149		bin26.ctg33596.04149
bin26.ctg33596.04436		bin26.ctg33596.04436
bin26.ctg33596.04473		bin26.ctg33596.04473
bin26.ctg33596.04473		bin11.ctg196704.03714	MAG: Uma2 family endonuclease	RNA processing		1e-05
bin26.ctg33596.04509		bin26.ctg33596.04509
bin26.ctg33596.04509		bin11.ctg196704.03676	transcriptional repressor	Regulatory & Transport Genes		2e-05
bin26.ctg33596.04551	MAG: transposase	bin26.ctg33596.04551	MAG: transposase	Transposase	2e-05
bin26.ctg33596.04633		bin26.ctg33596.04633
bin26.ctg33596.04633		bin11.ctg196704.03556	MAG: GDP-mannose 4,6-dehydratase	Non-ribisomal peptide synthetase		2e-05
bin26.ctg33596.04712		bin26.ctg33596.04712
bin26.ctg33596.04761		bin26.ctg33596.04761
bin26.ctg33596.04804		bin26.ctg33596.04804
bin26.ctg33596.04804		bin11.ctg196704.03165	MAG: glutamate racemase	Aminoacid biosynthesis		1e-05
bin26.ctg33596.04851	MAG: CTP synthase	bin26.ctg33596.04851	MAG: CTP synthase	Precursor: Purine/Pyrimidine	1e-05
bin26.ctg33596.04851	MAG: CTP synthase	bin13.ctg68176.03574	MAG: CTP synthase	Precursor: Purine/Pyrimidine			1e-05
bin26.ctg33596.04851	MAG: CTP synthase	bin11.ctg196704.03210	MAG: CTP synthase	Precursor: Purine/Pyrimidine		1e-05
bin26.ctg33596.04911		bin26.ctg33596.04911
bin26.ctg33596.04911		bin13.ctg68176.03626	MAG: helix-turn-helix domain-containing protein	Unknown			2e-05
bin26.ctg33596.04911		bin11.ctg196704.03252	MAG: helix-turn-helix domain-containing protein	Unknown		1e-05
bin26.ctg33596.05000		bin26.ctg33596.05000
bin26.ctg33596.05035		bin26.ctg33596.05035
bin26.ctg33596.05071		bin26.ctg33596.05071
bin26.ctg33596.05123		bin26.ctg33596.05123
bin26.ctg33596.05123		bin13.ctg68176.03978	acetate--CoA ligase family protein	Cell division			1e-05
bin26.ctg33596.05123		bin11.ctg196704.03056	MAG: acetate--CoA ligase family protein	Cell division		2e-05
bin26.ctg33596.05160	MAG: GAF domain-containing protein	bin26.ctg33596.05160	MAG: GAF domain-containing protein		1e-05
bin26.ctg33596.05248		bin26.ctg33596.05248
bin26.ctg33596.05294		bin26.ctg33596.05294
bin26.ctg33596.05294		bin11.ctg196704.03993	MAG: tryptophan synthase subunit alpha	Aminoacid biosynthesis		2e-05
bin26.ctg33596.05294		bin13.ctg68176.03910	MAG: tryptophan synthase subunit alpha	Aminoacid biosynthesis			1e-05
bin26.ctg33596.05330		bin26.ctg33596.05330
bin26.ctg33596.05370		bin26.ctg33596.05370
bin26.ctg33596.05405		bin26.ctg33596.05405
bin26.ctg33596.05405		bin11.ctg196704.04249	MAG: methyltransferase domain-containing protein	Methylation		1e-05
bin26.ctg33596.05450		bin26.ctg33596.05450
bin26.ctg33596.05450		bin13.ctg68176.04209	MAG: DUF1997 domain-containing protein	Unknown			1e-05
bin26.ctg33596.05450		bin11.ctg196704.04206	MAG: DUF1997 domain-containing protein	Unknown		2e-05
bin26.ctg33596.05489		bin26.ctg33596.05489
bin26.ctg33596.05489		bin11.ctg196704.04161	MAG: glycosyltransferase	Modifying enzymes		1e-05
bin26.ctg33596.05529		bin26.ctg33596.05529
bin26.ctg33596.05529		bin13.ctg68176.04293	MAG: YihY/virulence factor BrkB family protein	Defense			1e-05
bin26.ctg33596.05567	MAG: transaldolase	bin26.ctg33596.05567	MAG: transaldolase		1e-05
bin26.ctg33596.05567	MAG: transaldolase	bin11.ctg196704.04062	MAG: transaldolase			9e-05
bin26.ctg33596.05492	Plastid and cyanobacterial ribosomal protein (PSRP-3 / Ycf65)	bin26.ctg33596.05492	Plastid and cyanobacterial ribosomal protein (PSRP-3 / Ycf65)	Ribosomal Proteins	8e-05
bin26.ctg33596.05492	Plastid and cyanobacterial ribosomal protein (PSRP-3 / Ycf65)	bin13.ctg68176.04252	Plastid and cyanobacterial ribosomal protein (PSRP-3 / Ycf65)	Ribosomal Proteins			0.00032
bin26.ctg33596.05492	Plastid and cyanobacterial ribosomal protein (PSRP-3 / Ycf65)	bin11.ctg196704.04157	Plastid and cyanobacterial ribosomal protein (PSRP-3 / Ycf65)	Ribosomal Proteins		0.00066
bin26.ctg33596.05531		bin26.ctg33596.05531
bin26.ctg33596.05531		bin13.ctg68176.04997	MAG: transposase	Transposase			3e-05
bin26.ctg33596.05531		bin11.ctg196704.04120	MAG: transposase	Transposase		7e-05
bin11.ctg151753.00040	methyltransferase domain-containing protein	bin11.ctg151753.00040	methyltransferase domain-containing protein	Methylation		0
bin11.ctg166677.00080	MAG: UvrD-helicase domain-containing protein	bin11.ctg166677.00080	MAG: UvrD-helicase domain-containing protein	Defense		3e-05
bin11.ctg173661.00124	MAG: dual specificity protein phosphatase family protein	bin11.ctg173661.00124	MAG: dual specificity protein phosphatase family protein			1e-05
bin11.ctg173661.00124	MAG: dual specificity protein phosphatase family protein	bin26.ctg33596.04646
bin11.ctg173661.00124	MAG: dual specificity protein phosphatase family protein	bin11.ctg196704.03537	MAG: dual specificity protein phosphatase family protein			1e-05
bin11.ctg182512.00163	MAG: TrkH family potassium uptake protein	bin11.ctg182512.00163	MAG: TrkH family potassium uptake protein			0
bin11.ctg182512.00163	MAG: TrkH family potassium uptake protein	bin11.ctg196704.03497	MAG: TrkH family potassium uptake protein			0
bin11.ctg182512.00163	MAG: TrkH family potassium uptake protein	bin26.ctg33596.04681
bin11.ctg184773.00201	MAG: ShlB/FhaC/HecB family hemolysin secretion/activation protein	bin11.ctg184773.00201	MAG: ShlB/FhaC/HecB family hemolysin secretion/activation protein	Transport		0
bin11.ctg186031.00238	MAG: M23 family metallopeptidase	bin11.ctg186031.00238	MAG: M23 family metallopeptidase	Aminoacid biosynthesis		1e-05
bin11.ctg186031.00238	MAG: M23 family metallopeptidase	bin26.ctg33596.03658
bin11.ctg186031.00238	MAG: M23 family metallopeptidase	bin11.ctg196704.02411	MAG: M23 family metallopeptidase	Aminoacid biosynthesis		1e-05
bin11.ctg187240.00273	MAG: gamma carbonic anhydrase family protein	bin11.ctg187240.00273	MAG: gamma carbonic anhydrase family protein	CCM		0
bin11.ctg188997.00307		bin11.ctg188997.00307
bin11.ctg189993.00346	MAG: phycobiliprotein lyase	bin11.ctg189993.00346	MAG: phycobiliprotein lyase	Phycocynin		1e-05
bin11.ctg189993.00346	MAG: phycobiliprotein lyase	bin11.ctg196704.01967	MAG: phycobiliprotein lyase	Phycocynin		1e-05
bin11.ctg189993.00346	MAG: phycobiliprotein lyase	bin26.ctg33596.03393
bin11.ctg191713.00385	MAG: nitrogenase	bin11.ctg191713.00385	MAG: nitrogenase	Nitrogen cycle		0
bin11.ctg194457.00467	MAG: GAF domain-containing protein	bin11.ctg194457.00467	MAG: GAF domain-containing protein			1e-05
bin11.ctg196704.00513	MAG: L,D-transpeptidase	bin11.ctg196704.00513	MAG: L,D-transpeptidase	Peptidoglycan Remodeling		3e-05
bin11.ctg196704.00552	MAG: Gfo/Idh/MocA family oxidoreductase	bin11.ctg196704.00552	MAG: Gfo/Idh/MocA family oxidoreductase	Cofactor: Molybdenum Cofactor (MoCo)		5e-05
bin11.ctg196704.00595	MAG: hypothetical protein JWS08_03385	bin11.ctg196704.00595	MAG: hypothetical protein JWS08_03385	Hypothetical protein		5e-05
bin11.ctg196704.00681	MAG: cobalamin biosynthesis protein CobW	bin11.ctg196704.00681	MAG: cobalamin biosynthesis protein CobW	Cofactor: Cobalamin (Vitamin B12)		1e-05
bin11.ctg196704.00681	MAG: cobalamin biosynthesis protein CobW	bin11.ctg190026.00361	MAG: cobalamin biosynthesis protein CobW	Cofactor: Cobalamin (Vitamin B12)		1e-05
bin11.ctg196704.00681	MAG: cobalamin biosynthesis protein CobW	bin26.ctg33596.01890
bin11.ctg196704.00720	MAG: hypothetical protein JWS08_04540	bin11.ctg196704.00720	MAG: hypothetical protein JWS08_04540	Hypothetical protein		0
bin11.ctg196704.00804	MAG: trypsin-like peptidase domain-containing protein	bin11.ctg196704.00804	MAG: trypsin-like peptidase domain-containing protein	Stress response		4e-05
bin11.ctg196704.00844	MAG: AEC family transporter	bin11.ctg196704.00844	MAG: AEC family transporter	Transport		1e-05
bin11.ctg196704.00844	MAG: AEC family transporter	bin13.ctg68160.00997	MAG: AEC family transporter	Transport			0
bin11.ctg196704.00844	MAG: AEC family transporter	bin26.ctg33596.02215
bin11.ctg196704.00929	MAG: GAF domain-containing protein	bin11.ctg196704.00929	MAG: GAF domain-containing protein			3e-05
bin11.ctg196704.01028	MAG: sigma-70 family RNA polymerase sigma factor	bin11.ctg196704.01028	MAG: sigma-70 family RNA polymerase sigma factor	Regulatory & Transport Genes		0.00047
bin11.ctg196704.01028	MAG: sigma-70 family RNA polymerase sigma factor	bin26.ctg33596.02340	MAG: sigma-70 family RNA polymerase sigma factor	Regulatory & Transport Genes	0.00036
bin11.ctg196704.01028	MAG: sigma-70 family RNA polymerase sigma factor	bin13.ctg68160.01086	MAG: sigma-70 family RNA polymerase sigma factor	Regulatory & Transport Genes			0.00032
bin11.ctg196704.01069	hypothetical protein E1H12_07555	bin11.ctg196704.01069	hypothetical protein E1H12_07555	Hypothetical protein		9e-05
bin11.ctg196704.01109	30S ribosomal protein S18	bin11.ctg196704.01109	30S ribosomal protein S18	Ribosomal Proteins		0.00032
bin11.ctg196704.01109	30S ribosomal protein S18	bin26.ctg33596.02425	30S ribosomal protein S18	Ribosomal Proteins	6e-05
bin11.ctg196704.01109	30S ribosomal protein S18	bin13.ctg68160.01791	30S ribosomal protein S18	Ribosomal Proteins			8e-05
bin11.ctg196704.01189	MAG: adenine phosphoribosyltransferase	bin11.ctg196704.01189	MAG: adenine phosphoribosyltransferase	Cofactor: Riboflavin (Vitamin B2)		2e-05
bin11.ctg196704.01189	MAG: adenine phosphoribosyltransferase	bin26.ctg33596.02502
bin11.ctg196704.01189	MAG: adenine phosphoribosyltransferase	bin13.ctg68160.01698	adenine phosphoribosyltransferase	Cofactor: Riboflavin (Vitamin B2)			2e-05
bin11.ctg196704.01228	MAG: hypothetical protein JWS08_05520	bin11.ctg196704.01228	MAG: hypothetical protein JWS08_05520	Hypothetical protein		1e-05
bin11.ctg196704.01272	hydrogenase maturation protease	bin11.ctg196704.01272	hydrogenase maturation protease			2e-05
bin11.ctg196704.01320	UDP-N-acetylglucosamine 1-carboxyvinyltransferase	bin11.ctg196704.01320	UDP-N-acetylglucosamine 1-carboxyvinyltransferase	Cell wall		2e-05
bin11.ctg196704.01422	MAG: cyclic nucleotide-binding domain-containing protein	bin11.ctg196704.01422	MAG: cyclic nucleotide-binding domain-containing protein	Regulatory & Transport Genes		0
bin11.ctg196704.01466	MAG: Ni/Fe hydrogenase subunit alpha	bin11.ctg196704.01466	MAG: Ni/Fe hydrogenase subunit alpha			0.00012
bin11.ctg196704.01466	MAG: Ni/Fe hydrogenase subunit alpha	bin26.ctg33596.02779	MAG: Ni/Fe hydrogenase subunit alpha		0.0001
bin11.ctg196704.01466	MAG: Ni/Fe hydrogenase subunit alpha	bin13.ctg68160.01424	Ni/Fe hydrogenase subunit alpha				3e-05
bin11.ctg196704.01511	MAG: S9 family peptidase	bin11.ctg196704.01511	MAG: S9 family peptidase	Ribosomally synthesized and post-translationally modified peptide		0.00015
bin11.ctg196704.01588	subtype III-A CRISPR-associated RAMP protein Csm5	bin11.ctg196704.01588	subtype III-A CRISPR-associated RAMP protein Csm5	Defense		0
bin11.ctg196704.01673	MAG: hypothetical protein JWS08_07260	bin11.ctg196704.01673	MAG: hypothetical protein JWS08_07260	Hypothetical protein		1e-05
bin11.ctg196704.01710	MAG: tRNA (guanosine(37)-N1)-methyltransferase TrmD	bin11.ctg196704.01710	MAG: tRNA (guanosine(37)-N1)-methyltransferase TrmD	Methylation		1e-05
bin11.ctg196704.01710	MAG: tRNA (guanosine(37)-N1)-methyltransferase TrmD	bin26.ctg33596.03012	MAG: tRNA (guanosine(37)-N1)-methyltransferase TrmD	Methylation	7e-05
bin11.ctg196704.01710	MAG: tRNA (guanosine(37)-N1)-methyltransferase TrmD	bin13.ctg68160.01182	tRNA (guanosine(37)-N1)-methyltransferase TrmD	Methylation			0
bin11.ctg196704.01806	MAG: CHAT domain-containing protein	bin11.ctg196704.01806	MAG: CHAT domain-containing protein	Defense		1e-05
bin11.ctg196704.01857	DNA primase	bin11.ctg196704.01857	DNA primase	Defense		1e-05
bin11.ctg196704.01947	MAG: 30S ribosomal protein S6	bin11.ctg196704.01947	MAG: 30S ribosomal protein S6	Ribosomal Proteins		3e-05
bin11.ctg196704.01947	MAG: 30S ribosomal protein S6	bin26.ctg33596.03369
bin11.ctg196704.01947	MAG: 30S ribosomal protein S6	bin13.ctg68160.02315	MAG: 30S ribosomal protein S6	Ribosomal Proteins			5e-05
bin11.ctg196704.01986	MAG: GAF domain-containing protein	bin11.ctg196704.01986	MAG: GAF domain-containing protein			2e-05
bin11.ctg196704.02033	MAG: metal ABC transporter permease	bin11.ctg196704.02033	MAG: metal ABC transporter permease	Regulatory & Transport Genes		0
bin11.ctg196704.02033	MAG: metal ABC transporter permease	bin26.ctg33596.03462
bin11.ctg196704.02033	MAG: metal ABC transporter permease	bin13.ctg68160.02213	metal ABC transporter permease	Regulatory & Transport Genes			0
bin11.ctg196704.02124		bin11.ctg196704.02124				0.00016
bin11.ctg196704.02160	putative NTPase (NACHT family)	bin11.ctg196704.02160	putative NTPase (NACHT family)			0
bin11.ctg196704.02204	MAG: SMC family ATPase	bin11.ctg196704.02204	MAG: SMC family ATPase			1e-05
bin11.ctg196704.02251	MAG: nuclear transport factor 2 family protein	bin11.ctg196704.02251	MAG: nuclear transport factor 2 family protein	Toxin antitoxin		2e-05
bin11.ctg196704.02251	MAG: nuclear transport factor 2 family protein	bin26.ctg33596.03121
bin11.ctg196704.02251	MAG: nuclear transport factor 2 family protein	bin13.ctg68160.02010	MAG: nuclear transport factor 2 family protein	Toxin antitoxin			1e-05
bin11.ctg196704.02328	hypothetical protein HLUCCO16_21690	bin11.ctg196704.02328	hypothetical protein HLUCCO16_21690	Hypothetical protein		4e-05
bin11.ctg196704.02374	MAG: ribonuclease HI	bin11.ctg196704.02374	MAG: ribonuclease HI	RNA processing		0
bin11.ctg196704.02374	MAG: ribonuclease HI	bin26.ctg33596.03699
bin11.ctg196704.02374	MAG: ribonuclease HI	bin13.ctg68176.02517	ribonuclease HI	RNA processing			0
bin11.ctg196704.02428		bin11.ctg196704.02428				0
bin11.ctg196704.02501	photosystem I assembly protein Ycf4	bin11.ctg196704.02501	photosystem I assembly protein Ycf4	Photosystems		0.00012
bin11.ctg196704.02586	CHAT domain-containing protein	bin11.ctg196704.02586	CHAT domain-containing protein	Defense		3e-05
bin11.ctg196704.02633	MAG: type II toxin-antitoxin system VapC family toxin	bin11.ctg196704.02633	MAG: type II toxin-antitoxin system VapC family toxin	Toxin antitoxin		0
bin11.ctg196704.02685	MAG: hypothetical protein JWS08_11535	bin11.ctg196704.02685	MAG: hypothetical protein JWS08_11535	Hypothetical protein		0.00011
bin11.ctg196704.02723	MAG: UPF0175 family protein	bin11.ctg196704.02723	MAG: UPF0175 family protein			0
bin11.ctg196704.02723	MAG: UPF0175 family protein	bin13.ctg68176.02844	MAG: UPF0175 family protein				0
bin11.ctg196704.02761	tetratricopeptide repeat protein	bin11.ctg196704.02761	tetratricopeptide repeat protein	Defense		1e-05
bin11.ctg196704.02803	MAG: cation:proton antiporter	bin11.ctg196704.02803	MAG: cation:proton antiporter	Transport		1e-05
bin11.ctg196704.02848	MAG: NUDIX hydrolase	bin11.ctg196704.02848	MAG: NUDIX hydrolase	Modifying enzymes		1e-05
bin11.ctg196704.02848	MAG: NUDIX hydrolase	bin26.ctg33596.04110
bin11.ctg196704.02848	MAG: NUDIX hydrolase	bin13.ctg68176.02976	MAG: NUDIX hydrolase	Modifying enzymes			5e-05
bin11.ctg196704.02886	hypothetical protein	bin11.ctg196704.02886	hypothetical protein	Hypothetical protein		1e-05
bin11.ctg196704.03022	MAG: PAS domain S-box protein	bin11.ctg196704.03022	MAG: PAS domain S-box protein	Regulatory & Transport Genes		0
bin11.ctg196704.03066	NACHT domain-containing protein	bin11.ctg196704.03066	NACHT domain-containing protein			0
bin11.ctg196704.03111	WecB/TagA/CpsF family glycosyltransferase	bin11.ctg196704.03111	WecB/TagA/CpsF family glycosyltransferase	Modifying enzymes		1e-05
bin11.ctg196704.03147	MAG: ATPase	bin11.ctg196704.03147	MAG: ATPase			1e-05
bin11.ctg196704.03187	MAG: agmatinase	bin11.ctg196704.03187	MAG: agmatinase			2e-05
bin11.ctg196704.03187	MAG: agmatinase	bin26.ctg33596.04827	MAG: agmatinase		1e-05
bin11.ctg196704.03187	MAG: agmatinase	bin13.ctg68176.03555	agmatinase				2e-05
bin11.ctg196704.03235	MAG: 3-deoxy-7-phosphoheptulonate synthase	bin11.ctg196704.03235	MAG: 3-deoxy-7-phosphoheptulonate synthase	Precursor: Shikimate/Aromatic		2e-05
bin11.ctg196704.03235	MAG: 3-deoxy-7-phosphoheptulonate synthase	bin26.ctg33596.04893	MAG: 3-deoxy-7-phosphoheptulonate synthase	Precursor: Shikimate/Aromatic	3e-05
bin11.ctg196704.03235	MAG: 3-deoxy-7-phosphoheptulonate synthase	bin13.ctg68176.03612	3-deoxy-7-phosphoheptulonate synthase	Precursor: Shikimate/Aromatic			3e-05
bin11.ctg196704.03296	MAG: nitrogenase iron-molybdenum cofactor biosynthesis protein NifE	bin11.ctg196704.03296	MAG: nitrogenase iron-molybdenum cofactor biosynthesis protein NifE	Cofactor: Molybdenum Cofactor (MoCo)		0
bin11.ctg196704.03296	MAG: nitrogenase iron-molybdenum cofactor biosynthesis protein NifE	bin11.ctg191713.00388	MAG: nitrogenase iron-molybdenum cofactor biosynthesis protein NifE	Cofactor: Molybdenum Cofactor (MoCo)		0
bin11.ctg196704.03296	MAG: nitrogenase iron-molybdenum cofactor biosynthesis protein NifE	bin26.ctg33596.04988
bin11.ctg196704.03296	MAG: nitrogenase iron-molybdenum cofactor biosynthesis protein NifE	bin13.ctg68176.03722	MAG: nitrogenase iron-molybdenum cofactor biosynthesis protein NifE	Cofactor: Molybdenum Cofactor (MoCo)			0
bin11.ctg196704.03332	MAG: 2Fe-2S iron-sulfur cluster binding domain-containing protein	bin11.ctg196704.03332	MAG: 2Fe-2S iron-sulfur cluster binding domain-containing protein	Sulfur cycle		6e-05
bin11.ctg196704.03421		bin11.ctg196704.03421				1e-05
bin11.ctg196704.03548	MAG: 2-isopropylmalate synthase	bin11.ctg196704.03548	MAG: 2-isopropylmalate synthase	Aminoacid biosynthesis		0.00014
bin11.ctg196704.03548	MAG: 2-isopropylmalate synthase	bin26.ctg33596.04638	MAG: 2-isopropylmalate synthase	Aminoacid biosynthesis	8e-05
bin11.ctg196704.03548	MAG: 2-isopropylmalate synthase	bin13.ctg68176.03387	MAG: 2-isopropylmalate synthase	Aminoacid biosynthesis			0.00012
bin11.ctg196704.03586	MAG: carotenoid biosynthesis protein	bin11.ctg196704.03586	MAG: carotenoid biosynthesis protein	Terpenoids		4e-05
bin11.ctg196704.03586	MAG: carotenoid biosynthesis protein	bin26.ctg33596.04600	MAG: carotenoid biosynthesis protein	Terpenoids	7e-05
bin11.ctg196704.03750	MAG: glycosyltransferase	bin11.ctg196704.03750	MAG: glycosyltransferase	Modifying enzymes		0
bin11.ctg196704.03789	MAG: DNA topoisomerase 4 subunit A	bin11.ctg196704.03789	MAG: DNA topoisomerase 4 subunit A	Cell division		0
bin11.ctg196704.03789	MAG: DNA topoisomerase 4 subunit A	bin13.ctg68176.03162	DNA topoisomerase 4 subunit A	Cell division			0
bin11.ctg196704.03789	MAG: DNA topoisomerase 4 subunit A	bin26.ctg33596.04399
bin11.ctg196704.04021	photosystem II biogenesis protein Psp29	bin11.ctg196704.04021	photosystem II biogenesis protein Psp29	Photosystems		6e-05
bin26.ctg33596.00849	MAG: TM0106 family RecB-like putative nuclease	bin26.ctg33596.00849	MAG: TM0106 family RecB-like putative nuclease		4e-05
bin26.ctg33596.00930		bin26.ctg33596.00930
bin26.ctg33596.00979		bin26.ctg33596.00979
bin26.ctg33596.01012		bin26.ctg33596.01012
bin26.ctg33596.01110		bin26.ctg33596.01110
bin26.ctg33596.01186		bin26.ctg33596.01186
bin26.ctg33596.01267		bin26.ctg33596.01267
bin26.ctg33596.01352		bin26.ctg33596.01352
bin26.ctg33596.01474		bin26.ctg33596.01474
bin26.ctg33596.01507	MAG: ATP-dependent sacrificial sulfur transferase LarE	bin26.ctg33596.01507	MAG: ATP-dependent sacrificial sulfur transferase LarE	Sulfur cycle	9e-05
bin26.ctg33596.01507	MAG: ATP-dependent sacrificial sulfur transferase LarE	bin13.ctg68139.00178	ATP-dependent sacrificial sulfur transferase LarE	Sulfur cycle			4e-05
bin26.ctg33596.01507	MAG: ATP-dependent sacrificial sulfur transferase LarE	bin11.ctg196704.05627	MAG: ATP-dependent sacrificial sulfur transferase LarE	Sulfur cycle		2e-05
bin26.ctg33596.01552		bin26.ctg33596.01552
bin26.ctg33596.01596		bin26.ctg33596.01596
bin26.ctg33596.01637	MAG: B12-binding domain-containing radical SAM protein	bin26.ctg33596.01637	MAG: B12-binding domain-containing radical SAM protein	Cofactor: Cobalamin (Vitamin B12)	2e-05
bin26.ctg33596.01637	MAG: B12-binding domain-containing radical SAM protein	bin11.ctg196704.05870	MAG: B12-binding domain-containing radical SAM protein	Cofactor: Cobalamin (Vitamin B12)		2e-05
bin26.ctg33596.01698	MAG: hypothetical protein JWS08_02320	bin26.ctg33596.01698	MAG: hypothetical protein JWS08_02320	Hypothetical protein	2e-05
bin26.ctg33596.01744	MAG: DUF2325 domain-containing protein	bin26.ctg33596.01744	MAG: DUF2325 domain-containing protein	Unknown	2e-05
bin26.ctg33596.01864		bin26.ctg33596.01864
bin26.ctg33596.01864		bin11.ctg196704.00646	MAG: type II toxin-antitoxin system VapC family toxin	Toxin antitoxin		0
bin26.ctg33596.01864		bin13.ctg68139.00645	MAG: type II toxin-antitoxin system VapC family toxin	Toxin antitoxin			0
bin26.ctg33596.01906	MAG: AbrB/MazE/SpoVT family DNA-binding domain-containing protein	bin26.ctg33596.01906	MAG: AbrB/MazE/SpoVT family DNA-binding domain-containing protein	Regulatory & Transport Genes	0.0005
bin26.ctg33596.01906	MAG: AbrB/MazE/SpoVT family DNA-binding domain-containing protein	bin11.ctg196704.00695	MAG: AbrB/MazE/SpoVT family DNA-binding domain-containing protein	Regulatory & Transport Genes		0.00087
bin26.ctg33596.01906	MAG: AbrB/MazE/SpoVT family DNA-binding domain-containing protein	bin13.ctg68139.00687	MAG: AbrB/MazE/SpoVT family DNA-binding domain-containing protein	Regulatory & Transport Genes			0.00051
bin26.ctg33596.01953	MAG: hypothetical protein JWS08_03285	bin26.ctg33596.01953	MAG: hypothetical protein JWS08_03285	Hypothetical protein	2e-05
bin26.ctg33596.01996		bin26.ctg33596.01996
bin26.ctg33596.02033		bin26.ctg33596.02033
bin26.ctg33596.02074		bin26.ctg33596.02074
bin26.ctg33596.02160	MAG: chemotaxis protein CheW	bin26.ctg33596.02160	MAG: chemotaxis protein CheW	Motility	8e-05
bin26.ctg33596.02160	MAG: chemotaxis protein CheW	bin11.ctg196704.00931	MAG: chemotaxis protein CheW	Motility		0.0001
bin26.ctg33596.02198	hypothetical protein EYR95_00230	bin26.ctg33596.02198	hypothetical protein EYR95_00230	Hypothetical protein	0.00062
bin26.ctg33596.02248		bin26.ctg33596.02248
bin26.ctg33596.02327		bin26.ctg33596.02327
bin26.ctg33596.02377	MAG: NAD(P)H-quinone oxidoreductase subunit I	bin26.ctg33596.02377	MAG: NAD(P)H-quinone oxidoreductase subunit I	Citric acid	2e-05
bin26.ctg33596.02377	MAG: NAD(P)H-quinone oxidoreductase subunit I	bin13.ctg68160.01118	NAD(P)H-quinone oxidoreductase subunit I	Citric acid			6e-05
bin26.ctg33596.02377	MAG: NAD(P)H-quinone oxidoreductase subunit I	bin11.ctg196704.01058	MAG: NAD(P)H-quinone oxidoreductase subunit I	Citric acid		0.00016
bin26.ctg33596.02568		bin26.ctg33596.02568
bin26.ctg33596.02662	MAG: tetratricopeptide repeat protein	bin26.ctg33596.02662	MAG: tetratricopeptide repeat protein	Defense	6e-05
bin26.ctg33596.02751	MAG: NADH-quinone oxidoreductase subunit M	bin26.ctg33596.02751	MAG: NADH-quinone oxidoreductase subunit M	Citric acid	2e-05
bin26.ctg33596.02798		bin26.ctg33596.02798
bin26.ctg33596.02798		bin11.ctg196704.01481	MAG: ribbon-helix-helix protein, CopG family	Unknown		0
bin26.ctg33596.02798		bin13.ctg68160.01407	MAG: ribbon-helix-helix protein, CopG family	Unknown			1e-05
bin26.ctg33596.02876	50S ribosomal protein L14	bin26.ctg33596.02876	50S ribosomal protein L14	Ribosomal Proteins	4e-05
bin26.ctg33596.02876	50S ribosomal protein L14	bin11.ctg196704.01561	50S ribosomal protein L14	Ribosomal Proteins		0.00018
bin26.ctg33596.02876	50S ribosomal protein L14	bin13.ctg68160.01334	50S ribosomal protein L14	Ribosomal Proteins			0.0002
bin26.ctg33596.02912		bin26.ctg33596.02912
bin26.ctg33596.02912		bin11.ctg196704.01602	MAG: hypothetical protein JWS08_06980	Hypothetical protein		2e-05
bin26.ctg33596.02912		bin13.ctg68160.01288	MAG: hypothetical protein JWS08_06980	Hypothetical protein			2e-05
bin26.ctg33596.02949	pentapeptide repeat-containing protein	bin26.ctg33596.02949	pentapeptide repeat-containing protein	Resistance Genes	1e-05
bin26.ctg33596.03023	helix-turn-helix domain-containing protein	bin26.ctg33596.03023	helix-turn-helix domain-containing protein	Unknown	4e-05
bin26.ctg33596.03070		bin26.ctg33596.03070
bin26.ctg33596.03070		bin13.ctg68160.01849	dTDP-4-dehydrorhamnose 3,5-epimerase	Modifying enzymes			0
bin26.ctg33596.03070		bin11.ctg196704.01843	dTDP-4-dehydrorhamnose 3,5-epimerase	Modifying enzymes		1e-05
bin26.ctg33596.03155		bin26.ctg33596.03155
bin26.ctg33596.03195		bin26.ctg33596.03195
bin26.ctg33596.03269	MAG: hydrogenase formation protein HypD	bin26.ctg33596.03269	MAG: hydrogenase formation protein HypD	Cofactor: Others	1e-05
bin26.ctg33596.03269	MAG: hydrogenase formation protein HypD	bin11.ctg196704.01905	MAG: hydrogenase formation protein HypD	Cofactor: Others		2e-05
bin26.ctg33596.03316		bin26.ctg33596.03316
bin26.ctg33596.03361	MAG: hypothetical protein JWS08_09065	bin26.ctg33596.03361	MAG: hypothetical protein JWS08_09065	Hypothetical protein	0.0001
bin26.ctg33596.03535	MAG: MAPEG family protein	bin26.ctg33596.03535	MAG: MAPEG family protein	Stress response	8e-05
bin26.ctg33596.03575		bin26.ctg33596.03575
bin26.ctg33596.03575		bin11.ctg196704.02335	MAG: replicative DNA helicase	Defense		0
bin26.ctg33596.03575		bin13.ctg68176.02438	replicative DNA helicase	Defense			0
bin26.ctg33596.03575		bin13.ctg68160.02371	replicative DNA helicase	Defense			0
bin26.ctg33596.03647		bin26.ctg33596.03647
bin26.ctg33596.03735	MAG: phosphotransacetylase family protein	bin26.ctg33596.03735	MAG: phosphotransacetylase family protein		4e-05
bin26.ctg33596.03771	MAG: YraN family protein	bin26.ctg33596.03771	MAG: YraN family protein	Stress response	0.00032
bin26.ctg33596.03855	MAG: hypothetical protein JWS08_11230	bin26.ctg33596.03855	MAG: hypothetical protein JWS08_11230	Hypothetical protein	0.00015
bin26.ctg33596.03983		bin26.ctg33596.03983
bin26.ctg33596.03983		bin11.ctg196704.05257	MAG: IS66 family transposase	Transposase		2e-05
bin26.ctg33596.03983		bin26.ctg33596.04413
bin26.ctg33596.03983		bin26.ctg33596.04160	MAG: IS66 family transposase	Transposase	0
bin26.ctg33596.03983		bin11.ctg196704.05451	MAG: IS66 family transposase	Transposase		2e-05
bin26.ctg33596.03983		bin26.ctg33596.01772
bin26.ctg33596.04155		bin26.ctg33596.04155
bin26.ctg33596.04326	MAG: CHAT domain-containing protein	bin26.ctg33596.04326	MAG: CHAT domain-containing protein	Defense	2e-05
bin26.ctg33596.04520		bin26.ctg33596.04520
bin26.ctg33596.04520		bin13.ctg68176.03265	isoprenyl transferase				1e-05
bin26.ctg33596.04520		bin11.ctg196704.03666	undecaprenyl diphosphate synthase UppS	Sulfur cycle		1e-05
bin26.ctg33596.04725		bin26.ctg33596.04725
bin26.ctg33596.04725		bin13.ctg68176.03466	MAG: hypothetical protein JWS08_14225	Hypothetical protein			9e-05
bin26.ctg33596.04725		bin11.ctg185871.00226	MAG: hypothetical protein JWS08_14225	Hypothetical protein		4e-05
bin26.ctg33596.04725		bin11.ctg196704.03106	MAG: hypothetical protein JWS08_14225	Hypothetical protein		7e-05
bin26.ctg33596.04769	MAG: glycogen debranching enzyme N-terminal domain-containing protein	bin26.ctg33596.04769	MAG: glycogen debranching enzyme N-terminal domain-containing protein		4e-05
bin26.ctg33596.04810		bin26.ctg33596.04810
bin26.ctg33596.04862		bin26.ctg33596.04862
bin26.ctg33596.05078	MAG: efflux RND transporter permease subunit	bin26.ctg33596.05078	MAG: efflux RND transporter permease subunit	Regulatory & Transport Genes	2e-05
bin26.ctg33596.05078	MAG: efflux RND transporter permease subunit	bin11.ctg196704.03392	MAG: efflux RND transporter permease subunit	Regulatory & Transport Genes		4e-05
bin26.ctg33596.05078	MAG: efflux RND transporter permease subunit	bin13.ctg68176.03827	efflux RND transporter permease subunit	Regulatory & Transport Genes			2e-05
bin26.ctg33596.05170		bin26.ctg33596.05170
bin26.ctg33596.05212	MAG: hypothetical protein JWS08_15850	bin26.ctg33596.05212	MAG: hypothetical protein JWS08_15850	Hypothetical protein	0.00021
bin26.ctg33596.05301	MAG: J domain-containing protein	bin26.ctg33596.05301	MAG: J domain-containing protein		1e-05
bin26.ctg33596.05301	MAG: J domain-containing protein	bin11.ctg196704.04000	MAG: J domain-containing protein			1e-05
bin26.ctg33596.05301	MAG: J domain-containing protein	bin13.ctg68176.03920	MAG: J domain-containing protein				1e-05
bin26.ctg33596.05339	MAG: 3'(2'),5'-bisphosphate nucleotidase	bin26.ctg33596.05339	MAG: 3'(2'),5'-bisphosphate nucleotidase		2e-05
bin26.ctg33596.05377	MAG: alanine--glyoxylate aminotransferase family protein	bin26.ctg33596.05377	MAG: alanine--glyoxylate aminotransferase family protein	Aminoacid biosynthesis	4e-05
bin26.ctg33596.05377	MAG: alanine--glyoxylate aminotransferase family protein	bin11.ctg196704.04275	alanine--glyoxylate aminotransferase family protein	Aminoacid biosynthesis		9e-05
bin26.ctg33596.05377	MAG: alanine--glyoxylate aminotransferase family protein	bin13.ctg68176.04112	alanine--glyoxylate aminotransferase family protein	Aminoacid biosynthesis			0.00025
bin26.ctg33596.05497		bin26.ctg33596.05497
bin11.ctg120916.00008	MAG: hypothetical protein JWS08_03045	bin11.ctg120916.00008	MAG: hypothetical protein JWS08_03045	Hypothetical protein		2e-05
bin11.ctg154425.00046	MAG: TonB-dependent receptor	bin11.ctg154425.00046	MAG: TonB-dependent receptor	Regulatory & Transport Genes		0
bin11.ctg169019.00090	PAS domain S-box protein	bin11.ctg169019.00090	PAS domain S-box protein	Regulatory & Transport Genes		0.00013
bin11.ctg184773.00206	MAG: glutamyl-tRNA reductase	bin11.ctg184773.00206	MAG: glutamyl-tRNA reductase	Cofactor: Heme/Siroheme		0.00011
bin11.ctg186610.00245	MAG: DUF4347 domain-containing protein	bin11.ctg186610.00245	MAG: DUF4347 domain-containing protein	Unknown		1e-05
bin11.ctg188381.00278	restriction endonuclease, partial	bin11.ctg188381.00278	restriction endonuclease, partial			0
bin11.ctg188381.00278	restriction endonuclease, partial	bin11.ctg196704.02995	restriction endonuclease, partial			0
bin11.ctg188381.00278	restriction endonuclease, partial	bin26.ctg33596.04187
bin11.ctg188997.00317	diheme cytochrome C	bin11.ctg188997.00317	diheme cytochrome C	Cofactor: Heme/Siroheme		4e-05
bin11.ctg188997.00317	diheme cytochrome C	bin11.ctg196704.03457	diheme cytochrome C	Cofactor: Heme/Siroheme		4e-05
bin11.ctg189993.00353	MAG: TMEM165/GDT1 family protein	bin11.ctg189993.00353	MAG: TMEM165/GDT1 family protein			1e-05
bin11.ctg189993.00353	MAG: TMEM165/GDT1 family protein	bin11.ctg196704.01962	MAG: TMEM165/GDT1 family protein			1e-05
bin11.ctg189993.00353	MAG: TMEM165/GDT1 family protein	bin26.ctg33596.03384
bin11.ctg193051.00436	DNA helicase UvrD	bin11.ctg193051.00436	DNA helicase UvrD	Defense		1e-05
bin11.ctg196704.00474	MAG: Uma2 family endonuclease	bin11.ctg196704.00474	MAG: Uma2 family endonuclease	RNA processing		0
bin11.ctg196704.00603	tocopherol cyclase	bin11.ctg196704.00603	tocopherol cyclase	Cofactor: Tocopherol/Tocotrienol (Vitamin E)		2e-05
bin11.ctg196704.00690	sulfotransferase	bin11.ctg196704.00690	sulfotransferase	Methylation		1e-05
bin11.ctg196704.00771	MAG: ABC transporter ATP-binding protein	bin11.ctg196704.00771	MAG: ABC transporter ATP-binding protein	Regulatory & Transport Genes		1e-05
bin11.ctg196704.00771	MAG: ABC transporter ATP-binding protein	bin26.ctg33596.02110
bin11.ctg196704.00809		bin11.ctg196704.00809				0
bin11.ctg196704.00888	exodeoxyribonuclease VII small subunit	bin11.ctg196704.00888	exodeoxyribonuclease VII small subunit	RNA processing		1e-05
bin11.ctg196704.00935	MAG: signal peptidase I	bin11.ctg196704.00935	MAG: signal peptidase I	Modifying enzymes		0.00018
bin11.ctg196704.00935	MAG: signal peptidase I	bin26.ctg33596.02156	MAG: signal peptidase I	Modifying enzymes	0.00027
bin11.ctg196704.00987	MAG: DUF3386 family protein	bin11.ctg196704.00987	MAG: DUF3386 family protein	Unknown		0.00024
bin11.ctg196704.01153	MAG: pentapeptide repeat-containing protein	bin11.ctg196704.01153	MAG: pentapeptide repeat-containing protein	Resistance Genes		1e-05
bin11.ctg196704.01153	MAG: pentapeptide repeat-containing protein	bin13.ctg68160.01741	MAG: pentapeptide repeat-containing protein	Resistance Genes			1e-05
bin11.ctg196704.01153	MAG: pentapeptide repeat-containing protein	bin26.ctg33596.02468	MAG: pentapeptide repeat-containing protein	Resistance Genes	1e-05
bin11.ctg196704.01278	GNAT family N-acetyltransferase	bin11.ctg196704.01278	GNAT family N-acetyltransferase	Cofactor: Pantothenate/CoA		9e-05
bin11.ctg196704.01327	MAG: magnesium-protoporphyrin IX monomethyl ester (oxidative) cyclase	bin11.ctg196704.01327	MAG: magnesium-protoporphyrin IX monomethyl ester (oxidative) cyclase			2e-05
bin11.ctg196704.01327	MAG: magnesium-protoporphyrin IX monomethyl ester (oxidative) cyclase	bin13.ctg68160.01555	MAG: magnesium-protoporphyrin IX monomethyl ester (oxidative) cyclase				4e-05
bin11.ctg196704.01327	MAG: magnesium-protoporphyrin IX monomethyl ester (oxidative) cyclase	bin26.ctg33596.02646
bin11.ctg196704.01383	ABC transporter permease	bin11.ctg196704.01383	ABC transporter permease	Regulatory & Transport Genes		2e-05
bin11.ctg196704.01383	ABC transporter permease	bin26.ctg33596.02691	ABC transporter permease	Regulatory & Transport Genes	5e-05
bin11.ctg196704.01383	ABC transporter permease	bin13.ctg68160.01515	ABC transporter permease	Regulatory & Transport Genes			6e-05
bin11.ctg196704.01429	FtsX-like permease family protein	bin11.ctg196704.01429	FtsX-like permease family protein	Cell wall		3e-05
bin11.ctg196704.01429	FtsX-like permease family protein	bin26.ctg33596.02738	FtsX-like permease family protein	Cell wall	1e-05
bin11.ctg196704.01429	FtsX-like permease family protein	bin13.ctg68160.01466	FtsX-like permease family protein	Cell wall			0.00011
bin11.ctg196704.01475	MAG: DUF3611 family protein	bin11.ctg196704.01475	MAG: DUF3611 family protein	Unknown		4e-05
bin11.ctg196704.01516	MAG: precorrin-3B synthase	bin11.ctg196704.01516	MAG: precorrin-3B synthase	Cofactor: Cobalamin (Vitamin B12)		2e-05
bin11.ctg196704.01633	pyruvate dehydrogenase (acetyl-transferring) E1 component subunit alpha	bin11.ctg196704.01633	pyruvate dehydrogenase (acetyl-transferring) E1 component subunit alpha	Citric acid		5e-05
bin11.ctg196704.01633	pyruvate dehydrogenase (acetyl-transferring) E1 component subunit alpha	bin13.ctg68160.01253	pyruvate dehydrogenase (acetyl-transferring) E1 component subunit alpha	Citric acid			2e-05
bin11.ctg196704.01633	pyruvate dehydrogenase (acetyl-transferring) E1 component subunit alpha	bin26.ctg33596.02939	pyruvate dehydrogenase (acetyl-transferring) E1 component subunit alpha	Citric acid	1e-05
bin11.ctg196704.01715	MAG: Uma2 family endonuclease	bin11.ctg196704.01715	MAG: Uma2 family endonuclease	RNA processing		0
bin11.ctg196704.01715	MAG: Uma2 family endonuclease	bin13.ctg68160.01177	MAG: Uma2 family endonuclease	RNA processing			1e-05
bin11.ctg196704.01715	MAG: Uma2 family endonuclease	bin26.ctg33596.03017
bin11.ctg196704.01761	MAG: GTPase ObgE	bin11.ctg196704.01761	MAG: GTPase ObgE	Ribosomal Proteins		1e-05
bin11.ctg196704.01761	MAG: GTPase ObgE	bin13.ctg68160.01948	MAG: GTPase ObgE	Ribosomal Proteins			2e-05
bin11.ctg196704.01761	MAG: GTPase ObgE	bin26.ctg33596.03305	MAG: GTPase ObgE	Ribosomal Proteins	2e-05
bin11.ctg196704.01863	MAG: PhoX family phosphatase	bin11.ctg196704.01863	MAG: PhoX family phosphatase	Hydrogen oxidation		1e-05
bin11.ctg196704.01863	MAG: PhoX family phosphatase	bin26.ctg33596.03325	MAG: PhoX family phosphatase	Hydrogen oxidation	2e-05
bin11.ctg196704.01908	MAG: hydrogenase maturation nickel metallochaperone HypA	bin11.ctg196704.01908	MAG: hydrogenase maturation nickel metallochaperone HypA			0.00047
bin11.ctg196704.02040	MAG: GTP-binding protein	bin11.ctg196704.02040	MAG: GTP-binding protein	Cell division		1e-05
bin11.ctg196704.02040	MAG: GTP-binding protein	bin13.ctg68160.02207	GTP-binding protein	Cell division			0
bin11.ctg196704.02040	MAG: GTP-binding protein	bin26.ctg33596.03468	MAG: GTP-binding protein	Cell division	6e-05
bin11.ctg196704.02086	alpha/beta hydrolase	bin11.ctg196704.02086	alpha/beta hydrolase	tRNA-dependent cyclodipeptide synthases		4e-05
bin11.ctg196704.02129		bin11.ctg196704.02129				0
bin11.ctg196704.02129		bin26.ctg33596.03234
bin11.ctg196704.02213	MAG: NAD(P)/FAD-dependent oxidoreductase	bin11.ctg196704.02213	MAG: NAD(P)/FAD-dependent oxidoreductase	Citric acid		0
bin11.ctg196704.02256	hypothetical protein E1H12_01135	bin11.ctg196704.02256	hypothetical protein E1H12_01135	Hypothetical protein		3e-05
bin11.ctg196704.02256	hypothetical protein E1H12_01135	bin26.ctg33596.03116	hypothetical protein E1H12_01135	Hypothetical protein	8e-05
bin11.ctg196704.02299	hypothetical protein	bin11.ctg196704.02299	hypothetical protein	Hypothetical protein		0
bin11.ctg196704.02470	MAPEG family protein	bin11.ctg196704.02470	MAPEG family protein	Stress response		3e-05
bin11.ctg196704.02506	histidine kinase	bin11.ctg196704.02506	histidine kinase	Regulatory & Transport Genes		0
bin11.ctg196704.02546	MAG: hypothetical protein JWS08_11050	bin11.ctg196704.02546	MAG: hypothetical protein JWS08_11050	Hypothetical protein		2e-05
bin11.ctg196704.02546	MAG: hypothetical protein JWS08_11050	bin26.ctg33596.03814	MAG: hypothetical protein JWS08_11050	Hypothetical protein	1e-05
bin11.ctg196704.02595	hypothetical protein E1H12_01745	bin11.ctg196704.02595	hypothetical protein E1H12_01745	Hypothetical protein		3e-05
bin11.ctg196704.02691	phosphoenolpyruvate carboxylase	bin11.ctg196704.02691	phosphoenolpyruvate carboxylase	Citric acid		2e-05
bin11.ctg196704.02729	MAG: CHAT domain-containing protein	bin11.ctg196704.02729	MAG: CHAT domain-containing protein	Defense		2e-05
bin11.ctg196704.02768	MAG: PspA/IM30 family protein	bin11.ctg196704.02768	MAG: PspA/IM30 family protein	Stress response		1e-05
bin11.ctg196704.02768	MAG: PspA/IM30 family protein	bin26.ctg33596.04021
bin11.ctg196704.02808	Baculovirus major capsid protein VP39	bin11.ctg196704.02808	Baculovirus major capsid protein VP39			1e-05
bin11.ctg196704.02895	DUF3352 domain-containing protein	bin11.ctg196704.02895	DUF3352 domain-containing protein	Unknown		1e-05
bin11.ctg196704.02954	heterodisulfide reductase subunit C	bin11.ctg196704.02954	heterodisulfide reductase subunit C	Sulfur cycle		0.00016
bin11.ctg196704.02989	subtype MYXAN CRISPR-associated helicase Cas3	bin11.ctg196704.02989	subtype MYXAN CRISPR-associated helicase Cas3	Defense		1e-05
bin11.ctg196704.02989	subtype MYXAN CRISPR-associated helicase Cas3	bin26.ctg33596.04193
bin11.ctg196704.03029	serine protease	bin11.ctg196704.03029	serine protease	Aminoacid biosynthesis		2e-05
bin11.ctg196704.03116	MAG: ATP-dependent Clp protease proteolytic subunit	bin11.ctg196704.03116	MAG: ATP-dependent Clp protease proteolytic subunit			5e-05
bin11.ctg196704.03116	MAG: ATP-dependent Clp protease proteolytic subunit	bin26.ctg33596.04742
bin11.ctg196704.03116	MAG: ATP-dependent Clp protease proteolytic subunit	bin11.ctg185208.00218	MAG: ATP-dependent Clp protease proteolytic subunit			5e-05
bin11.ctg196704.03116	MAG: ATP-dependent Clp protease proteolytic subunit	bin13.ctg68176.03476	ATP-dependent Clp protease proteolytic subunit				7e-05
bin11.ctg196704.03197	MAG: response regulator	bin11.ctg196704.03197	MAG: response regulator	Stress response		2e-05
bin11.ctg196704.03378	MAG: glycosyltransferase family 4 protein	bin11.ctg196704.03378	MAG: glycosyltransferase family 4 protein	Modifying enzymes		1e-05
bin11.ctg196704.03427	MAG: glutamine--fructose-6-phosphate transaminase (isomerizing)	bin11.ctg196704.03427	MAG: glutamine--fructose-6-phosphate transaminase (isomerizing)	Aminoacid biosynthesis		1e-05
bin11.ctg196704.03427	MAG: glutamine--fructose-6-phosphate transaminase (isomerizing)	bin26.ctg33596.05198	MAG: glutamine--fructose-6-phosphate transaminase (isomerizing)	Aminoacid biosynthesis	3e-05
bin11.ctg196704.03427	MAG: glutamine--fructose-6-phosphate transaminase (isomerizing)	bin13.ctg68176.04058	glutamine--fructose-6-phosphate transaminase (isomerizing)	Aminoacid biosynthesis			1e-05
bin11.ctg196704.03468	BMC domain-containing protein	bin11.ctg196704.03468	BMC domain-containing protein			0.00016
bin11.ctg196704.03505	MAG: GTP-binding protein	bin11.ctg196704.03505	MAG: GTP-binding protein	Cell division		0
bin11.ctg196704.03505	MAG: GTP-binding protein	bin26.ctg33596.04673
bin13.ctg68160.01585	hypothetical protein	bin13.ctg68160.01585	hypothetical protein	Hypothetical protein			5e-05
bin13.ctg68160.01632	MAG: photosystem II reaction center protein I	bin13.ctg68160.01632	MAG: photosystem II reaction center protein I	Photosystems			0
bin13.ctg68160.01678	MAG: SufS family cysteine desulfurase	bin13.ctg68160.01678	MAG: SufS family cysteine desulfurase	Aminoacid biosynthesis			1e-05
bin13.ctg68160.01719	hypothetical protein	bin13.ctg68160.01719	hypothetical protein	Hypothetical protein			0
bin13.ctg68160.01765	circularly permuted type 2 ATP-grasp protein	bin13.ctg68160.01765	circularly permuted type 2 ATP-grasp protein	Ribosomally synthesized and post-translationally modified peptide			0
bin13.ctg68160.01813	MBL fold metallo-hydrolase	bin13.ctg68160.01813	MBL fold metallo-hydrolase	Cofactor: Folates			1e-05
bin13.ctg68160.01949	nitrogenase	bin13.ctg68160.01949	nitrogenase	Nitrogen cycle			4e-05
bin13.ctg68160.02077	MAG: preQ(1) synthase	bin13.ctg68160.02077	MAG: preQ(1) synthase				4e-05
bin13.ctg68160.02077	MAG: preQ(1) synthase	bin26.ctg33596.03174	MAG: preQ(1) synthase		7e-05
bin13.ctg68160.02077	MAG: preQ(1) synthase	bin11.ctg196704.02186	MAG: preQ(1) synthase			0.00011
bin13.ctg68160.02118	hypothetical protein	bin13.ctg68160.02118	hypothetical protein	Hypothetical protein			0
bin13.ctg68160.02154	type II toxin-antitoxin system VapC family toxin	bin13.ctg68160.02154	type II toxin-antitoxin system VapC family toxin	Toxin antitoxin			3e-05
bin13.ctg68160.02198	VOC family protein	bin13.ctg68160.02198	VOC family protein	Stress response			1e-05
bin13.ctg68160.02254	PAS domain S-box protein	bin13.ctg68160.02254	PAS domain S-box protein	Regulatory & Transport Genes			0
bin13.ctg68160.02297	class I SAM-dependent methyltransferase	bin13.ctg68160.02297	class I SAM-dependent methyltransferase	Methylation			0
bin13.ctg68176.02472	ferrochelatase	bin13.ctg68176.02472	ferrochelatase	Cofactor: Heme/Siroheme			2e-05
bin13.ctg68176.02472	ferrochelatase	bin11.ctg196704.02300	ferrochelatase	Cofactor: Heme/Siroheme		6e-05
bin13.ctg68176.02472	ferrochelatase	bin26.ctg33596.03606
bin13.ctg68176.02598	DUF697 domain-containing protein	bin13.ctg68176.02598	DUF697 domain-containing protein	Unknown			9e-05
bin13.ctg68176.02684	cytochrome b559 subunit beta	bin13.ctg68176.02684	cytochrome b559 subunit beta	Photosystems			0.00047
bin13.ctg68176.02726	hypothetical protein	bin13.ctg68176.02726	hypothetical protein	Hypothetical protein			1e-05
bin13.ctg68176.02775	polyribonucleotide nucleotidyltransferase	bin13.ctg68176.02775	polyribonucleotide nucleotidyltransferase	RNA processing			6e-05
bin13.ctg68176.02775	polyribonucleotide nucleotidyltransferase	bin26.ctg33596.03900	MAG: polyribonucleotide nucleotidyltransferase	RNA processing	4e-05
bin13.ctg68176.02775	polyribonucleotide nucleotidyltransferase	bin11.ctg196704.02649	MAG: polyribonucleotide nucleotidyltransferase	RNA processing		8e-05
bin13.ctg68176.02820	methyl-accepting chemotaxis protein	bin13.ctg68176.02820	methyl-accepting chemotaxis protein	Motility			0
bin13.ctg68176.02902	MAG: bifunctional methylenetetrahydrofolate dehydrogenase/methenyltetrahydrofolate cyclohydrolase FolD	bin13.ctg68176.02902	MAG: bifunctional methylenetetrahydrofolate dehydrogenase/methenyltetrahydrofolate cyclohydrolase FolD	Cofactor: Folates			0
bin13.ctg68176.02943		bin13.ctg68176.02943					1e-05
bin13.ctg68176.02993	hypothetical protein AY600_13405	bin13.ctg68176.02993	hypothetical protein AY600_13405	Hypothetical protein			0
bin13.ctg68176.03042		bin13.ctg68176.03042					0
bin13.ctg68176.03090	MAG: DUF2809 domain-containing protein	bin13.ctg68176.03090	MAG: DUF2809 domain-containing protein	Unknown			0
bin13.ctg68176.03130	hypothetical protein EYR95_02190	bin13.ctg68176.03130	hypothetical protein EYR95_02190	Hypothetical protein			0
bin13.ctg68176.03169	hypothetical protein	bin13.ctg68176.03169	hypothetical protein	Hypothetical protein			7e-05
bin13.ctg68176.03169	hypothetical protein	bin26.ctg33596.04409
bin13.ctg68176.03204	NUDIX hydrolase	bin13.ctg68176.03204	NUDIX hydrolase	Modifying enzymes			0
bin13.ctg68176.03280	cation:proton antiporter subunit C	bin13.ctg68176.03280	cation:proton antiporter subunit C	Transport			2e-05
bin13.ctg68176.03320		bin13.ctg68176.03320					1e-05
bin13.ctg68176.03371		bin13.ctg68176.03371
bin13.ctg68176.03406	phosphonate ABC transporter ATP-binding protein	bin13.ctg68176.03406	phosphonate ABC transporter ATP-binding protein	Regulatory & Transport Genes			0
bin13.ctg68176.03449	FTR1 family protein	bin13.ctg68176.03449	FTR1 family protein				0
bin13.ctg68176.03501	response regulator	bin13.ctg68176.03501	response regulator	Stress response			1e-05
bin13.ctg68176.03590	CRISPR-associated endonuclease Cas1	bin13.ctg68176.03590	CRISPR-associated endonuclease Cas1	Defense			0
bin13.ctg68176.03744	MAG: hypothetical protein JWS08_15030	bin13.ctg68176.03744	MAG: hypothetical protein JWS08_15030	Hypothetical protein			0.00028
bin13.ctg68176.03782	MAG: NAD-dependent epimerase/dehydratase family protein, partial	bin13.ctg68176.03782	MAG: NAD-dependent epimerase/dehydratase family protein, partial	Citric acid			1e-05
bin13.ctg68176.03820	MAG: IS66 family transposase	bin13.ctg68176.03820	MAG: IS66 family transposase	Transposase			1e-05
bin13.ctg68176.03858	DUF4330 domain-containing protein	bin13.ctg68176.03858	DUF4330 domain-containing protein	Unknown			2e-05
bin13.ctg68176.03904	tRNA-(ms	bin13.ctg68176.03904	tRNA-(ms	tRNA			2e-05
bin13.ctg68176.03945	hypothetical protein	bin13.ctg68176.03945	hypothetical protein	Hypothetical protein			0.00132
bin13.ctg68176.03988	AAA domain	bin13.ctg68176.03988	AAA domain				0
bin13.ctg68176.04032	MAG: glycosyltransferase	bin13.ctg68176.04032	MAG: glycosyltransferase	Modifying enzymes			0
bin13.ctg68176.04075	DALR anticodon-binding domain-containing protein	bin13.ctg68176.04075	DALR anticodon-binding domain-containing protein				1e-05
bin13.ctg68176.04122	MAG: SpoIIE family protein phosphatase	bin13.ctg68176.04122	MAG: SpoIIE family protein phosphatase	Stress response			0
bin13.ctg68176.04169	SAM-dependent methyltransferase	bin13.ctg68176.04169	SAM-dependent methyltransferase	Methylation			0
bin13.ctg68176.04258	MAG: bifunctional nuclease family protein	bin13.ctg68176.04258	MAG: bifunctional nuclease family protein				8e-05
bin13.ctg68176.04258	MAG: bifunctional nuclease family protein	bin26.ctg33596.05498	MAG: bifunctional nuclease family protein		6e-05
bin13.ctg68176.04302	GspE/PulE family protein	bin13.ctg68176.04302	GspE/PulE family protein	Transport			1e-05
bin13.ctg68176.04302	GspE/PulE family protein	bin26.ctg33596.05537	MAG: GspE/PulE family protein	Transport	5e-05
bin13.ctg68176.04345	GDSL-type esterase/lipase family protein	bin13.ctg68176.04345	GDSL-type esterase/lipase family protein	Fatty acid			1e-05
bin13.ctg68176.04386		bin13.ctg68176.04386					0
bin13.ctg68176.04424	phosphomannomutase/phosphoglucomutase	bin13.ctg68176.04424	phosphomannomutase/phosphoglucomutase	Streptomycin biosynthesis			0
bin13.ctg68176.04516	hypothetical protein HLUCCO16_06040	bin13.ctg68176.04516	hypothetical protein HLUCCO16_06040	Hypothetical protein			1e-05
bin13.ctg68176.04698		bin13.ctg68176.04698					1e-05
bin13.ctg68176.04737	trypsin-like peptidase domain-containing protein	bin13.ctg68176.04737	trypsin-like peptidase domain-containing protein	Stress response			0.00023
bin13.ctg68176.04783	L-lactate dehydrogenase	bin13.ctg68176.04783	L-lactate dehydrogenase	Cofactor: Others			0
bin13.ctg68176.04868	TPM domain-containing protein	bin13.ctg68176.04868	TPM domain-containing protein				1e-05
bin13.ctg68176.04903	zf-TFIIB domain-containing protein	bin13.ctg68176.04903	zf-TFIIB domain-containing protein				0
bin13.ctg68176.04903	zf-TFIIB domain-containing protein	bin11.ctg196704.04721	zf-TFIIB domain-containing protein			0
bin13.ctg68176.04950	tetratricopeptide repeat protein	bin13.ctg68176.04950	tetratricopeptide repeat protein	Defense			1e-05
bin13.ctg68176.05003	type I-D CRISPR-associated helicase Cas3	bin13.ctg68176.05003	type I-D CRISPR-associated helicase Cas3	Defense			1e-05
bin13.ctg68176.05048	NTP transferase domain-containing protein	bin13.ctg68176.05048	NTP transferase domain-containing protein				0
bin13.ctg68176.05139		bin13.ctg68176.05139					1e-05
bin13.ctg68176.05177	ATP-binding protein	bin13.ctg68176.05177	ATP-binding protein				1e-05
bin13.ctg68176.05279		bin13.ctg68176.05279					0
bin13.ctg68176.05379	hypothetical protein	bin13.ctg68176.05379	hypothetical protein	Hypothetical protein			0
bin13.ctg68176.05420	Red carotenoid-binding protein	bin13.ctg68176.05420	Red carotenoid-binding protein	Terpenoids			0.00029
bin13.ctg68176.05601	asparaginase	bin13.ctg68176.05601	asparaginase				1e-05
bin13.ctg68176.05638	ATP-binding protein	bin13.ctg68176.05638	ATP-binding protein				0
bin13.ctg68176.05675	GAF domain-containing protein	bin13.ctg68176.05675	GAF domain-containing protein				2e-05
bin13.ctg68176.05717	VOC family protein	bin13.ctg68176.05717	VOC family protein	Stress response			2e-05
bin26.ctg33596.00118		bin26.ctg33596.00118
bin26.ctg33596.00153	MAG: lipoyl synthase	bin26.ctg33596.00153	MAG: lipoyl synthase	Cofactor: Lipoic Acid	2e-05
bin26.ctg33596.00239		bin26.ctg33596.00239
bin26.ctg33596.04530	site-2 protease family protein	bin26.ctg33596.04530	site-2 protease family protein	Stress response	0.0002
bin26.ctg33596.04530	site-2 protease family protein	bin13.ctg68176.03273	site-2 protease family protein	Stress response			0.0002
bin26.ctg33596.04569		bin26.ctg33596.04569
bin26.ctg33596.04690		bin26.ctg33596.04690
bin26.ctg33596.04737	MAG: AI-2E family transporter	bin26.ctg33596.04737	MAG: AI-2E family transporter	Transport	1e-05
bin26.ctg33596.04778		bin26.ctg33596.04778
bin26.ctg33596.04778		bin11.ctg196704.03150	MAG: NAD(P)H-dependent oxidoreductase	Citric acid		1e-05
bin26.ctg33596.04818		bin26.ctg33596.04818
bin26.ctg33596.04877		bin26.ctg33596.04877
bin26.ctg33596.05013		bin26.ctg33596.05013
bin26.ctg33596.05051		bin26.ctg33596.05051
bin26.ctg33596.05051		bin13.ctg68176.03788	response regulator transcription factor	Stress response			4e-05
bin26.ctg33596.05051		bin11.ctg196704.03359	MAG: response regulator transcription factor	Stress response		2e-05
bin26.ctg33596.05093		bin26.ctg33596.05093
bin26.ctg33596.05093		bin11.ctg196704.03023	MAG: hypothetical protein JWS08_15385	Hypothetical protein		1e-05
bin26.ctg33596.05137		bin26.ctg33596.05137
bin26.ctg33596.05223	MAG: F0F1 ATP synthase subunit epsilon	bin26.ctg33596.05223	MAG: F0F1 ATP synthase subunit epsilon	Respiration	9e-05
bin26.ctg33596.05223	MAG: F0F1 ATP synthase subunit epsilon	bin13.ctg68176.04082	ATP synthase F1 subunit epsilon	Respiration			6e-05
bin26.ctg33596.05223	MAG: F0F1 ATP synthase subunit epsilon	bin11.ctg181551.00144	F0F1 ATP synthase subunit epsilon	Respiration		9e-05
bin26.ctg33596.05223	MAG: F0F1 ATP synthase subunit epsilon	bin11.ctg196704.03400	F0F1 ATP synthase subunit epsilon	Respiration		9e-05
bin26.ctg33596.05269	MAG: cobyric acid synthase CobQ	bin26.ctg33596.05269	MAG: cobyric acid synthase CobQ	Cofactor: Cobalamin (Vitamin B12)	4e-05
bin26.ctg33596.05307		bin26.ctg33596.05307
bin26.ctg33596.05347		bin26.ctg33596.05347
bin26.ctg33596.05347		bin13.ctg68176.03952	HAD family hydrolase	Modifying enzymes			0
bin26.ctg33596.05347		bin11.ctg196704.04432	MAG: HAD family hydrolase	Modifying enzymes		0
bin26.ctg33596.05543	MAG: hypothetical protein JWS08_17115	bin26.ctg33596.05543	MAG: hypothetical protein JWS08_17115	Hypothetical protein	0.00247
bin11.ctg127344.00015	response regulator	bin11.ctg127344.00015	response regulator	Stress response		0
bin11.ctg156894.00052	homocitrate synthase	bin11.ctg156894.00052	homocitrate synthase	Citric acid		0
bin11.ctg169982.00096	MAG: CHAT domain-containing protein	bin11.ctg169982.00096	MAG: CHAT domain-containing protein	Defense		0
bin11.ctg177947.00137	MAG: nucleotidyltransferase family protein	bin11.ctg177947.00137	MAG: nucleotidyltransferase family protein			0
bin11.ctg177947.00137	MAG: nucleotidyltransferase family protein	bin11.ctg196704.00984	MAG: nucleotidyltransferase family protein			0
bin11.ctg182853.00174		bin11.ctg182853.00174				0
bin11.ctg185208.00212	MAG: NAD(P)/FAD-dependent oxidoreductase	bin11.ctg185208.00212	MAG: NAD(P)/FAD-dependent oxidoreductase	Citric acid		0.00017
bin11.ctg186610.00252	COG1357|YjbI Uncharacterized protei...	bin11.ctg186610.00252	COG1357|YjbI Uncharacterized protei...	Unknown		0.00187
bin11.ctg188391.00286	transposase	bin11.ctg188391.00286	transposase	Transposase		0
bin11.ctg191713.00400		bin11.ctg191713.00400
bin11.ctg193051.00444	DUF2281 domain-containing protein	bin11.ctg193051.00444	DUF2281 domain-containing protein	Unknown		1e-05
bin11.ctg193051.00444	DUF2281 domain-containing protein	bin11.ctg196704.04494	DUF2281 domain-containing protein	Unknown		1e-05
bin11.ctg196704.00483	MAG: GTP cyclohydrolase I FolE	bin11.ctg196704.00483	MAG: GTP cyclohydrolase I FolE	Cofactor: Folates		0.00011
bin11.ctg196704.00565	MAG: hypothetical protein JWS08_03285	bin11.ctg196704.00565	MAG: hypothetical protein JWS08_03285	Hypothetical protein		6e-05
bin11.ctg196704.00614	hypothetical protein HLUCCO16_09075	bin11.ctg196704.00614	hypothetical protein HLUCCO16_09075	Hypothetical protein		1e-05
bin11.ctg196704.00658	MAG: formylglycine-generating enzyme family protein	bin11.ctg196704.00658	MAG: formylglycine-generating enzyme family protein			0.0001
bin11.ctg196704.00697	DUF1232 domain-containing protein	bin11.ctg196704.00697	DUF1232 domain-containing protein	Unknown		6e-05
bin11.ctg196704.00732	thioredoxin	bin11.ctg196704.00732	thioredoxin	Stress response		0.00012
bin11.ctg196704.00732	thioredoxin	bin26.ctg33596.01999	thioredoxin	Stress response	6e-05
bin11.ctg196704.00817	SPFH/Band 7/PHB domain protein	bin11.ctg196704.00817	SPFH/Band 7/PHB domain protein			4e-05
bin11.ctg196704.00817	SPFH/Band 7/PHB domain protein	bin26.ctg33596.02251	MAG: SPFH/Band 7/PHB domain protein		0.00011
bin11.ctg196704.00945	MAG: NYN domain-containing protein	bin11.ctg196704.00945	MAG: NYN domain-containing protein	Unknown		0.00014
bin11.ctg196704.00945	MAG: NYN domain-containing protein	bin13.ctg68139.00814	MAG: NYN domain-containing protein	Unknown			7e-05
bin11.ctg196704.00945	MAG: NYN domain-containing protein	bin26.ctg33596.02146	MAG: NYN domain-containing protein	Unknown	0.00022
bin11.ctg196704.00995	MAG: AAA family ATPase	bin11.ctg196704.00995	MAG: AAA family ATPase	Regulatory & Transport Genes		0
bin11.ctg196704.01041	hypothetical protein	bin11.ctg196704.01041	hypothetical protein	Hypothetical protein		9e-05
bin11.ctg196704.01082	hypothetical protein	bin11.ctg196704.01082	hypothetical protein	Hypothetical protein		6e-05
bin11.ctg196704.01122	type IV pilus assembly protein PilM	bin11.ctg196704.01122	type IV pilus assembly protein PilM	Motility		5e-05
bin11.ctg196704.01160		bin11.ctg196704.01160				1e-05
bin11.ctg196704.01239	hypothetical protein HLUCCO16_02290	bin11.ctg196704.01239	hypothetical protein HLUCCO16_02290	Hypothetical protein		0
bin11.ctg196704.01293		bin11.ctg196704.01293				0
bin11.ctg196704.01343	MAG: tetratricopeptide repeat protein	bin11.ctg196704.01343	MAG: tetratricopeptide repeat protein	Defense		0
bin11.ctg196704.01390	serine/threonine protein kinase	bin11.ctg196704.01390	serine/threonine protein kinase	Aminoacid biosynthesis		0.00015
bin11.ctg196704.01437	hypothetical protein	bin11.ctg196704.01437	hypothetical protein	Hypothetical protein		0.00019
bin11.ctg196704.01483	MAG: molecular chaperone DnaJ	bin11.ctg196704.01483	MAG: molecular chaperone DnaJ	Stress response		0.00184
bin11.ctg196704.01566	MAG: 50S ribosomal protein L18	bin11.ctg196704.01566	MAG: 50S ribosomal protein L18	Ribosomal Proteins		0.00015
bin11.ctg196704.01643	MAG: pentapeptide repeat-containing protein	bin11.ctg196704.01643	MAG: pentapeptide repeat-containing protein	Resistance Genes		1e-05
bin11.ctg196704.01687	aspartate aminotransferase family protein	bin11.ctg196704.01687	aspartate aminotransferase family protein	Aminoacid biosynthesis		2e-05
bin11.ctg196704.01721	class I SAM-dependent methyltransferase	bin11.ctg196704.01721	class I SAM-dependent methyltransferase	Methylation		0
bin11.ctg196704.01773	serine/threonine protein kinase	bin11.ctg196704.01773	serine/threonine protein kinase	Aminoacid biosynthesis		0.00012
bin11.ctg196704.01828	MAG: S-methyl-5-thioribose-1-phosphate isomerase	bin11.ctg196704.01828	MAG: S-methyl-5-thioribose-1-phosphate isomerase	Aminoacid biosynthesis		2e-05
bin11.ctg196704.01875		bin11.ctg196704.01875				0
bin11.ctg196704.01920	hypothetical protein	bin11.ctg196704.01920	hypothetical protein	Hypothetical protein		2e-05
bin11.ctg196704.02001	MAG: MFS transporter	bin11.ctg196704.02001	MAG: MFS transporter	Regulatory & Transport Genes		2e-05
bin11.ctg196704.02050	MAG: ABC transporter substrate-binding protein	bin11.ctg196704.02050	MAG: ABC transporter substrate-binding protein	Regulatory & Transport Genes		1e-05
bin11.ctg196704.02050	MAG: ABC transporter substrate-binding protein	bin26.ctg33596.03476
bin11.ctg196704.02097	CHAT domain/Tetratricopeptide repeat	bin11.ctg196704.02097	CHAT domain/Tetratricopeptide repeat	Defense		0
bin11.ctg196704.02135	hypothetical protein HLUCCO16_13140	bin11.ctg196704.02135	hypothetical protein HLUCCO16_13140	Hypothetical protein		1e-05
bin11.ctg196704.02262	NACHT domain-containing protein	bin11.ctg196704.02262	NACHT domain-containing protein			0
bin11.ctg196704.02341	MAG: tetratricopeptide repeat protein	bin11.ctg196704.02341	MAG: tetratricopeptide repeat protein	Defense		0
bin11.ctg196704.02341	MAG: tetratricopeptide repeat protein	bin11.ctg187240.00263	MAG: tetratricopeptide repeat protein	Defense		0
bin11.ctg196704.02341	MAG: tetratricopeptide repeat protein	bin26.ctg33596.03569	MAG: tetratricopeptide repeat protein	Defense	1e-05
bin11.ctg196704.02440	HEPN domain-containing protein	bin11.ctg196704.02440	HEPN domain-containing protein			0
bin11.ctg196704.02479	MAG: DUF2808 domain-containing protein	bin11.ctg196704.02479	MAG: DUF2808 domain-containing protein	Unknown		0.00018
bin11.ctg196704.02479	MAG: DUF2808 domain-containing protein	bin26.ctg33596.03744	MAG: DUF2808 domain-containing protein	Unknown	2e-05
bin11.ctg196704.02513	MAG: hypothetical protein JWS08_10890	bin11.ctg196704.02513	MAG: hypothetical protein JWS08_10890	Hypothetical protein		0.0004
bin11.ctg196704.02513	MAG: hypothetical protein JWS08_10890	bin26.ctg33596.03775	MAG: hypothetical protein JWS08_10890	Hypothetical protein	8e-05
bin11.ctg196704.02552	rubredoxin	bin11.ctg196704.02552	rubredoxin	Carbon fixation		0.00025
bin11.ctg196704.02603	hypothetical protein	bin11.ctg196704.02603	hypothetical protein	Hypothetical protein		0
bin11.ctg196704.02697	hypothetical protein E1H12_03020	bin11.ctg196704.02697	hypothetical protein E1H12_03020	Hypothetical protein		0
bin11.ctg196704.02738		bin11.ctg196704.02738				0
bin11.ctg196704.02780		bin11.ctg196704.02780				4e-05
bin11.ctg196704.02905	ribonuclease III	bin11.ctg196704.02905	ribonuclease III	RNA processing		2e-05
bin11.ctg196704.02905	ribonuclease III	bin13.ctg68176.03055	ribonuclease III	RNA processing			1e-05
bin11.ctg196704.02905	ribonuclease III	bin26.ctg33596.04343
bin13.ctg68160.01281	NAD-binding protein	bin13.ctg68160.01281	NAD-binding protein	Citric acid			0
bin13.ctg68160.01323	MAG: 30S ribosomal protein S13	bin13.ctg68160.01323	MAG: 30S ribosomal protein S13	Ribosomal Proteins			7e-05
bin13.ctg68160.01323	MAG: 30S ribosomal protein S13	bin26.ctg33596.02888
bin13.ctg68160.01323	MAG: 30S ribosomal protein S13	bin11.ctg196704.01573	MAG: 30S ribosomal protein S13	Ribosomal Proteins		7e-05
bin13.ctg68160.01362	protoheme IX farnesyltransferase cyoE	bin13.ctg68160.01362	protoheme IX farnesyltransferase cyoE	Cofactor: Heme/Siroheme			1e-05
bin13.ctg68160.01362	protoheme IX farnesyltransferase cyoE	bin26.ctg33596.02846	protoheme IX farnesyltransferase cyoE	Cofactor: Heme/Siroheme	1e-05
bin13.ctg68160.01362	protoheme IX farnesyltransferase cyoE	bin11.ctg196704.01528	protoheme IX farnesyltransferase cyoE	Cofactor: Heme/Siroheme		1e-05
bin13.ctg68160.01400	PAS domain S-box protein	bin13.ctg68160.01400	PAS domain S-box protein	Regulatory & Transport Genes			0
bin13.ctg68160.01447	NAD(P)H-quinone oxidoreductase subunit F	bin13.ctg68160.01447	NAD(P)H-quinone oxidoreductase subunit F	Citric acid			1e-05
bin13.ctg68160.01501	CsbD family protein	bin13.ctg68160.01501	CsbD family protein	Stress response			0
bin13.ctg68160.01544	MAG: tetratricopeptide repeat protein	bin13.ctg68160.01544	MAG: tetratricopeptide repeat protein	Defense			1e-05
bin13.ctg68160.01589	hypothetical protein	bin13.ctg68160.01589	hypothetical protein	Hypothetical protein			2e-05
bin13.ctg68160.01637	MAG: hypothetical protein JWS08_05595	bin13.ctg68160.01637	MAG: hypothetical protein JWS08_05595	Hypothetical protein			0
bin13.ctg68160.01730	ABC transporter ATP-binding protein	bin13.ctg68160.01730	ABC transporter ATP-binding protein	Regulatory & Transport Genes			3e-05
bin13.ctg68160.01769	TIGR03960 family B12-binding radical SAM protein	bin13.ctg68160.01769	TIGR03960 family B12-binding radical SAM protein	Cofactor: Cobalamin (Vitamin B12)			1e-05
bin13.ctg68160.01769	TIGR03960 family B12-binding radical SAM protein	bin11.ctg196704.01126	TIGR03960 family B12-binding radical SAM protein	Cofactor: Cobalamin (Vitamin B12)		5e-05
bin13.ctg68160.01769	TIGR03960 family B12-binding radical SAM protein	bin26.ctg33596.02442
bin13.ctg68160.01820	MAG: glycine oxidase ThiO	bin13.ctg68160.01820	MAG: glycine oxidase ThiO	Cofactor: Thiamine (Vitamin B1)			6e-05
bin13.ctg68160.01862	MAG: S-methyl-5-thioribose-1-phosphate isomerase	bin13.ctg68160.01862	MAG: S-methyl-5-thioribose-1-phosphate isomerase	Aminoacid biosynthesis			3e-05
bin13.ctg68160.01862	MAG: S-methyl-5-thioribose-1-phosphate isomerase	bin26.ctg33596.03084	MAG: S-methyl-5-thioribose-1-phosphate isomerase	Aminoacid biosynthesis	3e-05
bin13.ctg68160.01908	TetR/AcrR family transcriptional regulator	bin13.ctg68160.01908	TetR/AcrR family transcriptional regulator	Regulatory & Transport Genes			9e-05
bin13.ctg68160.01908	TetR/AcrR family transcriptional regulator	bin26.ctg33596.03540	TetR/AcrR family transcriptional regulator	Regulatory & Transport Genes	0.00022
bin13.ctg68160.01953	SpoIIE family protein phosphatase	bin13.ctg68160.01953	SpoIIE family protein phosphatase	Stress response			1e-05
bin13.ctg68160.01953	SpoIIE family protein phosphatase	bin26.ctg33596.03310	SpoIIE family protein phosphatase	Stress response	1e-05
bin13.ctg68160.01953	SpoIIE family protein phosphatase	bin11.ctg196704.01756	SpoIIE family protein phosphatase	Stress response		3e-05
bin13.ctg68160.01994		bin13.ctg68160.01994					5e-05
bin13.ctg68160.02036	MAG: type II toxin-antitoxin system HicB family antitoxin	bin13.ctg68160.02036	MAG: type II toxin-antitoxin system HicB family antitoxin	Toxin antitoxin			6e-05
bin13.ctg68160.02036	MAG: type II toxin-antitoxin system HicB family antitoxin	bin11.ctg196704.02227	MAG: type II toxin-antitoxin system HicB family antitoxin	Toxin antitoxin		5e-05
bin13.ctg68160.02036	MAG: type II toxin-antitoxin system HicB family antitoxin	bin26.ctg33596.03141
bin13.ctg68160.02082	NAD(P)H-quinone oxidoreductase subunit 3	bin13.ctg68160.02082	NAD(P)H-quinone oxidoreductase subunit 3	Citric acid			8e-05
bin13.ctg68160.02082	NAD(P)H-quinone oxidoreductase subunit 3	bin11.ctg196704.02177	NAD(P)H-quinone oxidoreductase subunit 3	Citric acid		0.00013
bin13.ctg68160.02082	NAD(P)H-quinone oxidoreductase subunit 3	bin26.ctg33596.03179
bin13.ctg68160.02122	MFS transporter	bin13.ctg68160.02122	MFS transporter	Regulatory & Transport Genes			1e-05
bin13.ctg68160.02158	aminotransferase class IV	bin13.ctg68160.02158	aminotransferase class IV	Aminoacid biosynthesis			0
bin13.ctg68160.02204	HetZ-related protein	bin13.ctg68160.02204	HetZ-related protein				5e-05
bin13.ctg68160.02258	SRPBCC family protein	bin13.ctg68160.02258	SRPBCC family protein				1e-05
bin13.ctg68160.02302	MAG: TMEM165/GDT1 family protein	bin13.ctg68160.02302	MAG: TMEM165/GDT1 family protein				1e-05
bin13.ctg68160.02393	heterocyst differentiation master regulator HetR	bin13.ctg68160.02393	heterocyst differentiation master regulator HetR	Regulatory & Transport Genes			4e-05
bin13.ctg68160.02393	heterocyst differentiation master regulator HetR	bin11.ctg196704.02312	MAG: heterocyst differentiation master regulator HetR	Regulatory & Transport Genes		0.00011
bin13.ctg68160.02393	heterocyst differentiation master regulator HetR	bin26.ctg33596.03594	MAG: heterocyst differentiation master regulator HetR	Regulatory & Transport Genes	0.0001
bin13.ctg68160.02393	heterocyst differentiation master regulator HetR	bin13.ctg68176.02460	heterocyst differentiation master regulator HetR	Regulatory & Transport Genes			4e-05
bin13.ctg68176.02476		bin13.ctg68176.02476					3e-05
bin13.ctg68176.02476		bin11.ctg196704.02295				7e-05
bin13.ctg68176.02521	VWA domain-containing protein	bin13.ctg68176.02521	VWA domain-containing protein	Unknown			1e-05
bin13.ctg68176.02564	hypothetical protein	bin13.ctg68176.02564	hypothetical protein	Hypothetical protein			0
bin13.ctg68176.02608	glycosyltransferase family 2 protein	bin13.ctg68176.02608	glycosyltransferase family 2 protein	Modifying enzymes			1e-05
bin13.ctg68176.02646	hypothetical protein	bin13.ctg68176.02646	hypothetical protein	Hypothetical protein			0.00423
bin13.ctg68176.02646	hypothetical protein	bin26.ctg33596.03772	MAG: hypothetical protein JWS08_10880	Hypothetical protein	0.0054
bin13.ctg68176.02646	hypothetical protein	bin11.ctg196704.02511	hypothetical protein E1H12_12395	Hypothetical protein		0.00852
bin13.ctg68176.02824	ferredoxin family protein	bin13.ctg68176.02824	ferredoxin family protein	Photosystems			1e-05
bin13.ctg68176.02865	30S ribosomal protein S21	bin13.ctg68176.02865	30S ribosomal protein S21	Ribosomal Proteins			0.00043
bin13.ctg68176.02865	30S ribosomal protein S21	bin26.ctg33596.03998
bin13.ctg68176.02865	30S ribosomal protein S21	bin11.ctg196704.02788	30S ribosomal protein S21	Ribosomal Proteins		0.00056
bin13.ctg68176.02910	beta-lactamase class A	bin13.ctg68176.02910	beta-lactamase class A				1e-05
bin13.ctg68176.02950	MAG: tetratricopeptide repeat protein	bin13.ctg68176.02950	MAG: tetratricopeptide repeat protein	Defense			0
bin13.ctg68176.03096	LysR family transcriptional regulator	bin13.ctg68176.03096	LysR family transcriptional regulator	Regulatory & Transport Genes			1e-05
bin13.ctg68176.03137	MAG: histidine triad nucleotide-binding protein	bin13.ctg68176.03137	MAG: histidine triad nucleotide-binding protein				2e-05
bin13.ctg68176.03137	MAG: histidine triad nucleotide-binding protein	bin26.ctg33596.04375
bin13.ctg68176.03284	MAG: sugar transferase	bin13.ctg68176.03284	MAG: sugar transferase	Cell wall			0.00051
bin13.ctg68176.03284	MAG: sugar transferase	bin11.ctg196704.03646	MAG: sugar transferase	Cell wall		0.00095
bin13.ctg68176.03412	PAS domain S-box protein	bin13.ctg68176.03412	PAS domain S-box protein	Regulatory & Transport Genes			1e-05
bin13.ctg68176.03461	MAG: cofactor assembly of complex C subunit B	bin13.ctg68176.03461	MAG: cofactor assembly of complex C subunit B	Respiration			1e-05
bin13.ctg68176.03506	MAG: winged helix-turn-helix domain-containing protein	bin13.ctg68176.03506	MAG: winged helix-turn-helix domain-containing protein	Unknown			0.00041
bin13.ctg68176.03506	MAG: winged helix-turn-helix domain-containing protein	bin26.ctg33596.04767	MAG: winged helix-turn-helix domain-containing protein	Unknown	0.00012
bin13.ctg68176.03544	diguanylate cyclase	bin13.ctg68176.03544	diguanylate cyclase	Regulatory & Transport Genes			0
bin13.ctg68176.03596	type III-B CRISPR module RAMP protein Cmr4	bin13.ctg68176.03596	type III-B CRISPR module RAMP protein Cmr4	Defense			2e-05
bin13.ctg68176.03786	MAG: M23 family metallopeptidase	bin13.ctg68176.03786	MAG: M23 family metallopeptidase	Aminoacid biosynthesis			0
bin13.ctg68176.03824	MAG: aminomethyl-transferring glycine dehydrogenase	bin13.ctg68176.03824	MAG: aminomethyl-transferring glycine dehydrogenase	Cofactor: Others			0
bin13.ctg68176.03862	hypothetical protein	bin13.ctg68176.03862	hypothetical protein	Hypothetical protein			1e-05
bin13.ctg68176.03953	alkene reductase	bin13.ctg68176.03953	alkene reductase				0
bin13.ctg68176.03993	DUF29 domain-containing protein	bin13.ctg68176.03993	DUF29 domain-containing protein	Unknown			0
bin13.ctg68176.04036	hypothetical protein	bin13.ctg68176.04036	hypothetical protein	Hypothetical protein			0.00065
bin13.ctg68176.04129	MAG: transporter substrate-binding domain-containing protein	bin13.ctg68176.04129	MAG: transporter substrate-binding domain-containing protein	Transport			0
bin13.ctg68176.04174		bin13.ctg68176.04174					0
bin13.ctg68176.04225	bleomycin hydrolase	bin13.ctg68176.04225	bleomycin hydrolase	Modifying enzymes			5e-05
bin13.ctg68176.04269	MAG: ABC transporter ATP-binding protein	bin13.ctg68176.04269	MAG: ABC transporter ATP-binding protein	Regulatory & Transport Genes			1e-05
bin13.ctg68176.04269	MAG: ABC transporter ATP-binding protein	bin26.ctg33596.05506
bin13.ctg68176.04306	sulfurtransferase TusA family protein	bin13.ctg68176.04306	sulfurtransferase TusA family protein	Nitrogen cycle			5e-05
bin13.ctg68176.04349	hypothetical protein	bin13.ctg68176.04349	hypothetical protein	Hypothetical protein			0.00016
bin13.ctg68176.04391	B12-binding domain-containing radical SAM protein	bin13.ctg68176.04391	B12-binding domain-containing radical SAM protein	Cofactor: Cobalamin (Vitamin B12)			2e-05
bin13.ctg68176.04430	S8 family serine peptidase	bin13.ctg68176.04430	S8 family serine peptidase	Aminoacid biosynthesis			0
bin13.ctg68176.04472	hypothetical protein	bin13.ctg68176.04472	hypothetical protein	Hypothetical protein			0.00019
bin13.ctg68176.04472	hypothetical protein	bin13.ctg57649.00016	hypothetical protein	Hypothetical protein			0.00019
bin13.ctg68176.04520	hypothetical protein AP9108_19610	bin13.ctg68176.04520	hypothetical protein AP9108_19610	Hypothetical protein			0
bin13.ctg68176.04574	fasciclin domain-containing protein	bin13.ctg68176.04574	fasciclin domain-containing protein	Stress response			1e-05
bin13.ctg68176.04616	MAG: hypothetical protein JWS08_19430	bin13.ctg68176.04616	MAG: hypothetical protein JWS08_19430	Hypothetical protein			4e-05
bin13.ctg68176.04658	MAG: hypothetical protein JWS08_19265	bin13.ctg68176.04658	MAG: hypothetical protein JWS08_19265	Hypothetical protein			1e-05
bin13.ctg68176.04787	transglycosylase domain-containing protein	bin13.ctg68176.04787	transglycosylase domain-containing protein				2e-05
bin13.ctg68176.04830	O-antigen polymerase	bin13.ctg68176.04830	O-antigen polymerase				8e-05
bin13.ctg68176.04872	M48 family metalloprotease	bin13.ctg68176.04872	M48 family metalloprotease				1e-05
bin13.ctg68176.04911	MAG: phycocyanobilin:ferredoxin oxidoreductase	bin13.ctg68176.04911	MAG: phycocyanobilin:ferredoxin oxidoreductase	Photosystems			1e-05
bin13.ctg68176.04911	MAG: phycocyanobilin:ferredoxin oxidoreductase	bin11.ctg196704.04727	MAG: phycocyanobilin:ferredoxin oxidoreductase	Photosystems		2e-05
bin13.ctg68176.05052	hypothetical protein	bin13.ctg68176.05052	hypothetical protein	Hypothetical protein			0
bin13.ctg68176.05146	class I SAM-dependent methyltransferase	bin13.ctg68176.05146	class I SAM-dependent methyltransferase	Methylation			1e-05
bin13.ctg68176.05181	ABC transporter ATP-binding protein	bin13.ctg68176.05181	ABC transporter ATP-binding protein	Regulatory & Transport Genes			1e-05
bin13.ctg68176.05228	cobalt ECF transporter T component CbiQ	bin13.ctg68176.05228	cobalt ECF transporter T component CbiQ	Cofactor: Cobalamin (Vitamin B12)			0
bin13.ctg68176.05342	hypothetical protein	bin13.ctg68176.05342	hypothetical protein	Hypothetical protein			1e-05
bin13.ctg68176.05384	pentapeptide repeat-containing protein	bin13.ctg68176.05384	pentapeptide repeat-containing protein	Resistance Genes			1e-05
bin13.ctg68176.05514		bin13.ctg68176.05514					0
bin13.ctg68176.05565	class I SAM-dependent methyltransferase	bin13.ctg68176.05565	class I SAM-dependent methyltransferase	Methylation			0
bin13.ctg68176.05565	class I SAM-dependent methyltransferase	bin11.ctg196704.05356	class I SAM-dependent methyltransferase	Methylation		0
bin13.ctg68176.05605	tetratricopeptide repeat protein	bin13.ctg68176.05605	tetratricopeptide repeat protein	Defense			3e-05
bin13.ctg68176.05643	lmo0937 family membrane protein	bin13.ctg68176.05643	lmo0937 family membrane protein				0
bin26.ctg33596.03962		bin26.ctg33596.03962
bin26.ctg33596.04040		bin26.ctg33596.04040
bin26.ctg33596.04128		bin26.ctg33596.04128
bin26.ctg33596.04168		bin26.ctg33596.04168
bin26.ctg33596.04340		bin26.ctg33596.04340
bin26.ctg33596.04340		bin11.ctg196704.02908	MAG: DUF1816 domain-containing protein	Unknown		0.00021
bin26.ctg33596.04382		bin26.ctg33596.04382
bin26.ctg33596.04423		bin26.ctg33596.04423
bin26.ctg33596.04458		bin26.ctg33596.04458
bin26.ctg33596.04494		bin26.ctg33596.04494
bin26.ctg33596.04536		bin26.ctg33596.04536
bin26.ctg33596.04536		bin11.ctg196704.03651	MAG: cation:proton antiporter	Transport		2e-05
bin26.ctg33596.04575		bin26.ctg33596.04575
bin26.ctg33596.04619		bin26.ctg33596.04619
bin26.ctg33596.04657		bin26.ctg33596.04657
bin26.ctg33596.04698		bin26.ctg33596.04698
bin26.ctg33596.04698		bin11.ctg196704.03077	MAG: alpha/beta hydrolase	tRNA-dependent cyclodipeptide synthases		1e-05
bin26.ctg33596.04787		bin26.ctg33596.04787
bin26.ctg33596.04885		bin26.ctg33596.04885
bin26.ctg33596.04885		bin13.ctg68176.03603	MAG: hypothetical protein JWS08_14750	Hypothetical protein			0
bin26.ctg33596.04885		bin11.ctg196704.03227	MAG: hypothetical protein JWS08_14750	Hypothetical protein		0
bin26.ctg33596.04979		bin26.ctg33596.04979
bin26.ctg33596.05021		bin26.ctg33596.05021
bin26.ctg33596.05057		bin26.ctg33596.05057
bin26.ctg33596.05108		bin26.ctg33596.05108
bin26.ctg33596.05108		bin11.ctg196704.03042	hypothetical protein HLUCCO16_16095	Hypothetical protein		1e-05
bin26.ctg33596.05144		bin26.ctg33596.05144
bin26.ctg33596.05144		bin11.ctg196704.03482	MAG: polysaccharide deacetylase family protein			1e-05
bin26.ctg33596.05144		bin13.ctg68176.04000	polysaccharide deacetylase family protein				3e-05
bin26.ctg33596.05231		bin26.ctg33596.05231
bin26.ctg33596.05313		bin26.ctg33596.05313
bin26.ctg33596.05355		bin26.ctg33596.05355
bin26.ctg33596.05355		bin13.ctg68176.03937	sugar transferase	Cell wall			1e-05
bin26.ctg33596.05436	MAG: 4-hydroxy-3-methylbut-2-enyl diphosphate reductase	bin26.ctg33596.05436	MAG: 4-hydroxy-3-methylbut-2-enyl diphosphate reductase	Terpenoids	5e-05
bin26.ctg33596.05436	MAG: 4-hydroxy-3-methylbut-2-enyl diphosphate reductase	bin11.ctg196704.04219	MAG: 4-hydroxy-3-methylbut-2-enyl diphosphate reductase	Terpenoids		0.0001
bin26.ctg33596.05436	MAG: 4-hydroxy-3-methylbut-2-enyl diphosphate reductase	bin13.ctg68176.04193	4-hydroxy-3-methylbut-2-enyl diphosphate reductase	Terpenoids			3e-05
bin26.ctg33596.05515		bin26.ctg33596.05515
bin26.ctg33596.05591		bin26.ctg33596.05591
bin11.ctg127724.00021	MAG: pentapeptide repeat-containing protein	bin11.ctg127724.00021	MAG: pentapeptide repeat-containing protein	Resistance Genes		5e-05
bin11.ctg160249.00059	MAG: Rpn family recombination-promoting nuclease/putative transposase	bin11.ctg160249.00059	MAG: Rpn family recombination-promoting nuclease/putative transposase	Transposase		8e-05
bin11.ctg170361.00107	FTR1 family protein	bin11.ctg170361.00107	FTR1 family protein			2e-05
bin11.ctg181551.00148	hypothetical protein EA396_02490	bin11.ctg181551.00148	hypothetical protein EA396_02490	Hypothetical protein		0
bin11.ctg182989.00186		bin11.ctg182989.00186
bin11.ctg186837.00258	MAG: septum formation inhibitor Maf	bin11.ctg186837.00258	MAG: septum formation inhibitor Maf	Cell division		5e-05
bin11.ctg189506.00329	MAG: MFS transporter	bin11.ctg189506.00329	MAG: MFS transporter	Regulatory & Transport Genes		2e-05
bin11.ctg190026.00369	M20/M25/M40 family metallo-hydrolase	bin11.ctg190026.00369	M20/M25/M40 family metallo-hydrolase	Modifying enzymes		0
bin11.ctg192886.00406	MAG: DUF3747 domain-containing protein	bin11.ctg192886.00406	MAG: DUF3747 domain-containing protein	Unknown		4e-05
bin11.ctg194457.00451	serine/threonine protein phosphatase	bin11.ctg194457.00451	serine/threonine protein phosphatase	Aminoacid biosynthesis		0
bin11.ctg196704.00492	MAG: glycosyltransferase family 39 protein	bin11.ctg196704.00492	MAG: glycosyltransferase family 39 protein	Modifying enzymes		0
bin11.ctg196704.00532	MAG: GAF domain-containing protein	bin11.ctg196704.00532	MAG: GAF domain-containing protein			0.00084
bin11.ctg196704.00578	MAG: GntR family transcriptional regulator	bin11.ctg196704.00578	MAG: GntR family transcriptional regulator	Regulatory & Transport Genes		1e-05
bin11.ctg196704.00578	MAG: GntR family transcriptional regulator	bin26.ctg33596.01992
bin11.ctg196704.00666	GDP-mannose 4,6-dehydratase	bin11.ctg196704.00666	GDP-mannose 4,6-dehydratase	Non-ribisomal peptide synthetase		6e-05
bin11.ctg196704.00666	GDP-mannose 4,6-dehydratase	bin26.ctg33596.01878	MAG: GDP-mannose 4,6-dehydratase	Non-ribisomal peptide synthetase	2e-05
bin11.ctg196704.00666	GDP-mannose 4,6-dehydratase	bin13.ctg68139.00661	GDP-mannose 4,6-dehydratase	Non-ribisomal peptide synthetase			1e-05
bin11.ctg196704.00703	MAG: excinuclease ABC subunit UvrC	bin11.ctg196704.00703	MAG: excinuclease ABC subunit UvrC	Defense		0
bin11.ctg196704.00740	MAG: F0F1 ATP synthase subunit alpha	bin11.ctg196704.00740	MAG: F0F1 ATP synthase subunit alpha	Respiration		0.00035
bin11.ctg196704.00740	MAG: F0F1 ATP synthase subunit alpha	bin13.ctg68139.00713	F0F1 ATP synthase subunit alpha	Respiration			0.0003
bin11.ctg196704.00740	MAG: F0F1 ATP synthase subunit alpha	bin26.ctg33596.01940	MAG: F0F1 ATP synthase subunit alpha	Respiration	0.00037
bin11.ctg196704.00828	protein-glutamate O-methyltransferase CheR	bin11.ctg196704.00828	protein-glutamate O-methyltransferase CheR	Aminoacid biosynthesis		0
bin11.ctg196704.00828	protein-glutamate O-methyltransferase CheR	bin11.ctg109122.00003	protein-glutamate O-methyltransferase CheR	Aminoacid biosynthesis		0
bin11.ctg196704.00906		bin11.ctg196704.00906				1e-05
bin11.ctg196704.01091	site-2 protease family protein	bin11.ctg196704.01091	site-2 protease family protein	Stress response		3e-05
bin11.ctg196704.01130	ribonuclease HII	bin11.ctg196704.01130	ribonuclease HII	RNA processing		0.00016
bin11.ctg196704.01251	MAG: Uma2 family endonuclease	bin11.ctg196704.01251	MAG: Uma2 family endonuclease	RNA processing		0
bin11.ctg196704.01251	MAG: Uma2 family endonuclease	bin13.ctg68160.01635	MAG: Uma2 family endonuclease	RNA processing			0
bin11.ctg196704.01300		bin11.ctg196704.01300				2e-05
bin11.ctg196704.01359	MAG: tetratricopeptide repeat protein	bin11.ctg196704.01359	MAG: tetratricopeptide repeat protein	Defense		1e-05
bin11.ctg196704.01397	MAG: CsbD family protein	bin11.ctg196704.01397	MAG: CsbD family protein	Stress response		0
bin11.ctg196704.01446	NAD(P)H-quinone oxidoreductase subunit F	bin11.ctg196704.01446	NAD(P)H-quinone oxidoreductase subunit F	Citric acid		4e-05
bin11.ctg196704.01495		bin11.ctg196704.01495				1e-05
bin11.ctg196704.01495		bin26.ctg33596.02814
bin11.ctg196704.01533	hypothetical protein AY600_10805	bin11.ctg196704.01533	hypothetical protein AY600_10805	Hypothetical protein		1e-05
bin11.ctg196704.01533	hypothetical protein AY600_10805	bin13.ctg68160.01357	hypothetical protein AY600_10805	Hypothetical protein			1e-05
bin11.ctg196704.01654	MAG: cysteine synthase A	bin11.ctg196704.01654	MAG: cysteine synthase A	Aminoacid biosynthesis		5e-05
bin11.ctg196704.01654	MAG: cysteine synthase A	bin26.ctg33596.02959	cysteine synthase A	Aminoacid biosynthesis	0.00015
bin11.ctg196704.01654	MAG: cysteine synthase A	bin13.ctg68160.01235	MAG: cysteine synthase A	Aminoacid biosynthesis			7e-05
bin11.ctg196704.01693	SpoIID/LytB domain-containing protein	bin11.ctg196704.01693	SpoIID/LytB domain-containing protein			3e-05
bin11.ctg196704.01728	MAG: hemerythrin family protein	bin11.ctg196704.01728	MAG: hemerythrin family protein	Cofactor: Heme/Siroheme		0.00015
bin11.ctg196704.01787	MAG: FHA domain-containing protein	bin11.ctg196704.01787	MAG: FHA domain-containing protein			2e-05
bin11.ctg196704.01787	MAG: FHA domain-containing protein	bin13.ctg68160.01926	MAG: FHA domain-containing protein				0
bin11.ctg196704.01787	MAG: FHA domain-containing protein	bin26.ctg33596.03285
bin11.ctg196704.01883	MAG: CHAT domain-containing protein	bin11.ctg196704.01883	MAG: CHAT domain-containing protein	Defense		1e-05
bin11.ctg196704.01930	MAG: hypothetical protein JWS08_09020	bin11.ctg196704.01930	MAG: hypothetical protein JWS08_09020	Hypothetical protein		1e-05
bin11.ctg196704.02056	hypothetical protein	bin11.ctg196704.02056	hypothetical protein	Hypothetical protein		3e-05
bin11.ctg196704.02056	hypothetical protein	bin13.ctg68160.02197	hypothetical protein	Hypothetical protein			2e-05
bin11.ctg196704.02268	MAG: hypothetical protein JWS08_10175	bin11.ctg196704.02268	MAG: hypothetical protein JWS08_10175	Hypothetical protein		0
bin11.ctg196704.02352	MAG: FAD-dependent oxidoreductase	bin11.ctg196704.02352	MAG: FAD-dependent oxidoreductase	Regulatory & Transport Genes		1e-05
bin11.ctg196704.02352	MAG: FAD-dependent oxidoreductase	bin11.ctg186837.00259	MAG: FAD-dependent oxidoreductase	Regulatory & Transport Genes		1e-05
bin11.ctg196704.02352	MAG: FAD-dependent oxidoreductase	bin26.ctg33596.03558	MAG: FAD-dependent oxidoreductase	Regulatory & Transport Genes	2e-05
bin11.ctg196704.02446	2Fe-2S iron-sulfur cluster binding domain-containing protein	bin11.ctg196704.02446	2Fe-2S iron-sulfur cluster binding domain-containing protein	Sulfur cycle		2e-05
bin11.ctg196704.02485	MAG: GAF domain-containing protein	bin11.ctg196704.02485	MAG: GAF domain-containing protein			0
bin11.ctg196704.02523	COG1357|YjbI Uncharacterized protei...	bin11.ctg196704.02523	COG1357|YjbI Uncharacterized protei...	Unknown		0.00072
bin11.ctg196704.02561	MAG: hypothetical protein JWS08_11120	bin11.ctg196704.02561	MAG: hypothetical protein JWS08_11120	Hypothetical protein		1e-05
bin11.ctg196704.02616	MAG: AAA family ATPase	bin11.ctg196704.02616	MAG: AAA family ATPase	Regulatory & Transport Genes		1e-05
bin11.ctg196704.02616	MAG: AAA family ATPase	bin26.ctg33596.03872	MAG: AAA family ATPase	Regulatory & Transport Genes	1e-05
bin11.ctg196704.02562	MAG: hypothetical protein JWS08_11120	bin11.ctg196704.02562	MAG: hypothetical protein JWS08_11120	Hypothetical protein		1e-05
bin11.ctg196704.02617	MAG: adenosine kinase	bin11.ctg196704.02617	MAG: adenosine kinase			1e-05
bin11.ctg196704.02617	MAG: adenosine kinase	bin26.ctg33596.03873
bin11.ctg196704.02661	MAG: hypothetical protein JWS08_11445	bin11.ctg196704.02661	MAG: hypothetical protein JWS08_11445	Hypothetical protein		1e-05
bin11.ctg196704.02745	MAG: serine hydrolase	bin11.ctg196704.02745	MAG: serine hydrolase	Aminoacid biosynthesis		4e-05
bin11.ctg196704.02872	MAG: WD40 repeat domain-containing protein	bin11.ctg196704.02872	MAG: WD40 repeat domain-containing protein			0
bin11.ctg196704.02912	MAG: hypothetical protein JWS08_12705	bin11.ctg196704.02912	MAG: hypothetical protein JWS08_12705	Hypothetical protein		0
bin11.ctg196704.02912	MAG: hypothetical protein JWS08_12705	bin26.ctg33596.04336
bin11.ctg196704.02912	MAG: hypothetical protein JWS08_12705	bin13.ctg68176.03061	hypothetical protein	Hypothetical protein			1e-05
bin11.ctg196704.02970	MAG: ferredoxin--nitrite reductase	bin11.ctg196704.02970	MAG: ferredoxin--nitrite reductase	Nitrogen cycle		2e-05
bin11.ctg196704.02970	MAG: ferredoxin--nitrite reductase	bin26.ctg33596.04295	MAG: ferredoxin--nitrite reductase	Nitrogen cycle	2e-05
bin11.ctg196704.03002	GNAT family N-acetyltransferase	bin11.ctg196704.03002	GNAT family N-acetyltransferase	Cofactor: Pantothenate/CoA		3e-05
bin11.ctg196704.03049	MAG: alpha/beta fold hydrolase	bin11.ctg196704.03049	MAG: alpha/beta fold hydrolase	Cofactor: Folates		1e-05
bin11.ctg196704.03049	MAG: alpha/beta fold hydrolase	bin26.ctg33596.05115
bin11.ctg196704.03090	FTR1 family protein	bin11.ctg196704.03090	FTR1 family protein			3e-05
bin11.ctg196704.03168	PAS domain S-box protein	bin11.ctg196704.03168	PAS domain S-box protein	Regulatory & Transport Genes		2e-05
bin11.ctg196704.03168	PAS domain S-box protein	bin26.ctg33596.04807	PAS domain S-box protein	Regulatory & Transport Genes	2e-05
bin11.ctg196704.03215	DUF2283 domain-containing protein	bin11.ctg196704.03215	DUF2283 domain-containing protein	Unknown		0
bin11.ctg196704.03215	DUF2283 domain-containing protein	bin26.ctg33596.04856
bin11.ctg196704.03272		bin11.ctg196704.03272				1e-05
bin11.ctg196704.03317	MAG: phosphohistidine phosphatase SixA	bin11.ctg196704.03317	MAG: phosphohistidine phosphatase SixA	Regulatory & Transport Genes		0.0002
bin11.ctg196704.03317	MAG: phosphohistidine phosphatase SixA	bin26.ctg33596.05009	MAG: phosphohistidine phosphatase SixA	Regulatory & Transport Genes	0.00013
bin11.ctg196704.03397	putative metal-dependent membrane protease	bin11.ctg196704.03397	putative metal-dependent membrane protease			0
bin11.ctg196704.03397	putative metal-dependent membrane protease	bin11.ctg181551.00141	putative metal-dependent membrane protease			0
bin11.ctg196704.03531	MAG: SRPBCC family protein	bin11.ctg196704.03531	MAG: SRPBCC family protein			1e-05
bin11.ctg196704.03531	MAG: SRPBCC family protein	bin26.ctg33596.04651
bin11.ctg196704.03571	MAG: DUF4178 domain-containing protein	bin11.ctg196704.03571	MAG: DUF4178 domain-containing protein	Unknown		1e-05
bin11.ctg196704.03616	MAG: hypothetical protein JWS08_13645	bin11.ctg196704.03616	MAG: hypothetical protein JWS08_13645	Hypothetical protein		3e-05
bin11.ctg196704.03695	SET domain-containing protein	bin11.ctg196704.03695	SET domain-containing protein			0
bin11.ctg196704.03736	MAG: sugar ABC transporter permease	bin11.ctg196704.03736	MAG: sugar ABC transporter permease	Regulatory & Transport Genes		1e-05
bin11.ctg196704.03736	MAG: sugar ABC transporter permease	bin26.ctg33596.04447
bin11.ctg196704.03771	MAG: UDP-N-acetylmuramoyl-L-alanyl-D-glutamate--2,6-diaminopimelate ligase	bin11.ctg196704.03771	MAG: UDP-N-acetylmuramoyl-L-alanyl-D-glutamate--2,6-diaminopimelate ligase	Aminoacid biosynthesis		1e-05
bin11.ctg196704.03771	MAG: UDP-N-acetylmuramoyl-L-alanyl-D-glutamate--2,6-diaminopimelate ligase	bin13.ctg68176.03173	MAG: UDP-N-acetylmuramoyl-L-alanyl-D-glutamate--2,6-diaminopimelate ligase	Aminoacid biosynthesis			1e-05
bin11.ctg196704.03771	MAG: UDP-N-acetylmuramoyl-L-alanyl-D-glutamate--2,6-diaminopimelate ligase	bin26.ctg33596.04419	MAG: UDP-N-acetylmuramoyl-L-alanyl-D-glutamate--2,6-diaminopimelate ligase	Aminoacid biosynthesis	2e-05
bin11.ctg196704.03888	hypothetical protein AY600_12720	bin11.ctg196704.03888	hypothetical protein AY600_12720	Hypothetical protein		0
bin11.ctg196704.03931	MAG: universal stress protein	bin11.ctg196704.03931	MAG: universal stress protein	Stress response		1e-05
bin11.ctg196704.03931	MAG: universal stress protein	bin26.ctg33596.00063
bin11.ctg196704.03964	ribonucleotide-diphosphate reductase subunit beta	bin11.ctg196704.03964	ribonucleotide-diphosphate reductase subunit beta			2e-05
bin11.ctg196704.03964	ribonucleotide-diphosphate reductase subunit beta	bin26.ctg33596.00030
bin11.ctg196704.04002	MAG: Rpn family recombination-promoting nuclease/putative transposase	bin11.ctg196704.04002	MAG: Rpn family recombination-promoting nuclease/putative transposase	Transposase		0.0001
bin11.ctg196704.04048	MAG: photosystem I reaction center protein subunit XI	bin11.ctg196704.04048	MAG: photosystem I reaction center protein subunit XI	Photosystems		0.00362
bin11.ctg196704.04048	MAG: photosystem I reaction center protein subunit XI	bin26.ctg33596.05581	MAG: photosystem I reaction center protein subunit XI	Photosystems	0.00071
bin11.ctg196704.04088	MAG: primosomal protein N'	bin11.ctg196704.04088	MAG: primosomal protein N'			0
bin11.ctg196704.04088	MAG: primosomal protein N'	bin26.ctg33596.05563	MAG: primosomal protein N'		1e-05
bin11.ctg196704.04176	response regulator	bin11.ctg196704.04176	response regulator	Stress response		0.00013
bin11.ctg196704.04217	MAG: ammonium transporter	bin11.ctg196704.04217	MAG: ammonium transporter	Transport		0.00023
bin11.ctg196704.04217	MAG: ammonium transporter	bin13.ctg68176.04196	ammonium transporter	Transport			0.00038
bin11.ctg196704.04298	glycolate oxidase subunit GlcD	bin11.ctg196704.04298	glycolate oxidase subunit GlcD			2e-05
bin11.ctg196704.04298	glycolate oxidase subunit GlcD	bin13.ctg68176.04102	glycolate oxidase subunit GlcD				1e-05
bin11.ctg196704.04298	glycolate oxidase subunit GlcD	bin26.ctg33596.05368
bin11.ctg196704.04337	MAG: PadR family transcriptional regulator	bin11.ctg196704.04337	MAG: PadR family transcriptional regulator	Regulatory & Transport Genes		0
bin11.ctg196704.04337	MAG: PadR family transcriptional regulator	bin26.ctg33596.00562
bin11.ctg196704.04419	methionine synthase	bin11.ctg196704.04419	methionine synthase			0
bin11.ctg196704.04464	MAG: hypothetical protein JWS08_16240	bin11.ctg196704.04464	MAG: hypothetical protein JWS08_16240	Hypothetical protein		1e-05
bin11.ctg196704.04554	MAG: bifunctional riboflavin kinase/FAD synthetase	bin11.ctg196704.04554	MAG: bifunctional riboflavin kinase/FAD synthetase	Cofactor: Riboflavin (Vitamin B2)		1e-05
bin11.ctg196704.04590	glycerate kinase	bin11.ctg196704.04590	glycerate kinase			2e-05
bin11.ctg196704.04624	hypothetical protein E1H12_21430	bin11.ctg196704.04624	hypothetical protein E1H12_21430	Hypothetical protein		1e-05
bin11.ctg196704.04669	MAG: photosystem II reaction center X protein	bin11.ctg196704.04669	MAG: photosystem II reaction center X protein	Photosystems		0.0016
bin11.ctg196704.04669	MAG: photosystem II reaction center X protein	bin26.ctg33596.00454	MAG: photosystem II reaction center X protein	Photosystems	0.00027
bin11.ctg196704.04669	MAG: photosystem II reaction center X protein	bin13.ctg68176.04665	MAG: photosystem II reaction center X protein	Photosystems			0.00039
bin11.ctg196704.04705	DUF3368 domain-containing protein	bin11.ctg196704.04705	DUF3368 domain-containing protein	Unknown		0
bin11.ctg196704.04705	DUF3368 domain-containing protein	bin13.ctg68176.04893	DUF3368 domain-containing protein	Unknown			1e-05
bin11.ctg196704.04787	MAG: thioredoxin family protein	bin11.ctg196704.04787	MAG: thioredoxin family protein	Stress response		3e-05
bin11.ctg196704.04787	MAG: thioredoxin family protein	bin26.ctg33596.00238
bin11.ctg196704.04877		bin11.ctg196704.04877				2e-05
bin11.ctg196704.04926	MAG: peroxiredoxin	bin11.ctg196704.04926	MAG: peroxiredoxin	Defense		4e-05
bin11.ctg196704.04926	MAG: peroxiredoxin	bin26.ctg33596.00725
bin11.ctg196704.04968	MAG: glycosyltransferase family 4 protein	bin11.ctg196704.04968	MAG: glycosyltransferase family 4 protein	Modifying enzymes		0
bin11.ctg196704.05056	MAG: glycosyltransferase family 2 protein	bin11.ctg196704.05056	MAG: glycosyltransferase family 2 protein	Modifying enzymes		1e-05
bin11.ctg196704.05149		bin11.ctg196704.05149				0
bin11.ctg196704.05192	MAG: nucleotidyltransferase domain-containing protein	bin11.ctg196704.05192	MAG: nucleotidyltransferase domain-containing protein			0
bin11.ctg196704.05192	MAG: nucleotidyltransferase domain-containing protein	bin13.ctg68176.05436	MAG: nucleotidyltransferase domain-containing protein				0
bin11.ctg196704.05192	MAG: nucleotidyltransferase domain-containing protein	bin26.ctg33596.01003
bin11.ctg196704.05225	PEP-CTERM sorting domain-containing protein	bin11.ctg196704.05225	PEP-CTERM sorting domain-containing protein	EPS		0.00444
bin11.ctg196704.05275	hypothetical protein	bin11.ctg196704.05275	hypothetical protein	Hypothetical protein		9e-05
bin11.ctg196704.05366	TIGR00303 family protein	bin11.ctg196704.05366	TIGR00303 family protein	Ribosomally synthesized and post-translationally modified peptide		0
bin11.ctg196704.05454	MAG: translation initiation factor IF-2	bin11.ctg196704.05454	MAG: translation initiation factor IF-2	Ribosomal Proteins		0.00038
bin11.ctg196704.05525	MAG: HAMP domain-containing histidine kinase	bin11.ctg196704.05525	MAG: HAMP domain-containing histidine kinase	Regulatory & Transport Genes		2e-05
bin11.ctg196704.05573	calcium-binding protein	bin11.ctg196704.05573	calcium-binding protein	Transport		1e-05
bin11.ctg196704.05611	putative protein conserved in cyanobacteria	bin11.ctg196704.05611	putative protein conserved in cyanobacteria			1e-05
bin11.ctg196704.05652	iron transporter	bin11.ctg196704.05652	iron transporter	Transport		0
bin11.ctg196704.05687	tetratricopeptide repeat protein	bin11.ctg196704.05687	tetratricopeptide repeat protein	Defense		1e-05
bin11.ctg196704.05730	NB-ARC domain	bin11.ctg196704.05730	NB-ARC domain			3e-05
bin11.ctg196704.05770	MAG: energy-coupling factor transporter transmembrane protein EcfT	bin11.ctg196704.05770	MAG: energy-coupling factor transporter transmembrane protein EcfT	Transport		0
bin11.ctg196704.05770	MAG: energy-coupling factor transporter transmembrane protein EcfT	bin26.ctg33596.01562
bin11.ctg196704.05813	MAG: hypothetical protein JWS08_01685	bin11.ctg196704.05813	MAG: hypothetical protein JWS08_01685	Hypothetical protein		0
bin11.ctg196704.05813	MAG: hypothetical protein JWS08_01685	bin26.ctg33596.01521
bin11.ctg196704.05849	protein phosphatase 2C domain-containing protein	bin11.ctg196704.05849	protein phosphatase 2C domain-containing protein	Stress response		1e-05
bin11.ctg40659.05961	MAG: MAPEG family protein	bin11.ctg40659.05961	MAG: MAPEG family protein	Stress response		1e-05
bin11.ctg40659.05961	MAG: MAPEG family protein	bin11.ctg196704.03444	MAG: MAPEG family protein	Stress response		1e-05
bin11.ctg61734.05997	MAG: valine--tRNA ligase	bin11.ctg61734.05997	MAG: valine--tRNA ligase	tRNA		1e-05
bin11.ctg95740.06033	MAG: photosystem II chlorophyll-binding protein CP47	bin11.ctg95740.06033	MAG: photosystem II chlorophyll-binding protein CP47	Photosystems		0.00087
bin13.ctg68139.00038	hypothetical protein	bin13.ctg68139.00038	hypothetical protein	Hypothetical protein			0.00044
bin13.ctg68139.00159	putative protein conserved in cyanobacteria	bin13.ctg68139.00159	putative protein conserved in cyanobacteria				0
bin13.ctg68139.00159	putative protein conserved in cyanobacteria	bin26.ctg33596.01488
bin13.ctg68139.00200	hypothetical protein	bin13.ctg68139.00200	hypothetical protein	Hypothetical protein			0.00018
bin13.ctg68139.00321	protein phosphatase 2C domain-containing protein	bin13.ctg68139.00321	protein phosphatase 2C domain-containing protein	Stress response			5e-05
bin13.ctg68139.00360	MAG: hypothetical protein JWS08_01875	bin13.ctg68139.00360	MAG: hypothetical protein JWS08_01875	Hypothetical protein			9e-05
bin13.ctg68139.00360	MAG: hypothetical protein JWS08_01875	bin26.ctg33596.01568
bin13.ctg68139.00446	quinolinate synthase NadA	bin13.ctg68139.00446	quinolinate synthase NadA	Citric acid			1e-05
bin13.ctg68139.00446	quinolinate synthase NadA	bin26.ctg33596.01740
bin13.ctg68139.00494	PD-(D/E)XK nuclease family protein	bin13.ctg68139.00494	PD-(D/E)XK nuclease family protein				1e-05
bin13.ctg68139.00539		bin13.ctg68139.00539					0.0001
bin13.ctg68139.00594	MAG: hypothetical protein JWS08_03395	bin13.ctg68139.00594	MAG: hypothetical protein JWS08_03395	Hypothetical protein			0.0001
bin13.ctg68139.00594	MAG: hypothetical protein JWS08_03395	bin26.ctg33596.01977	MAG: hypothetical protein JWS08_03395	Hypothetical protein	0.00014
bin13.ctg68139.00594	MAG: hypothetical protein JWS08_03395	bin11.ctg196704.00592	MAG: hypothetical protein JWS08_03395	Hypothetical protein		0.00018
bin13.ctg68139.00633	MAG: DUF3318 domain-containing protein	bin13.ctg68139.00633	MAG: DUF3318 domain-containing protein	Unknown			0.00071
bin13.ctg68139.00633	MAG: DUF3318 domain-containing protein	bin11.ctg196704.00634	DUF3318 domain-containing protein	Unknown		0.00055
bin13.ctg68139.00633	MAG: DUF3318 domain-containing protein	bin26.ctg33596.01855	MAG: DUF3318 domain-containing protein	Unknown	0.0003
bin13.ctg68139.00679		bin13.ctg68139.00679					1e-05
bin13.ctg68139.00755	xyloglucan fucosyltransferase/Nodulation protein Z (NodZ)	bin13.ctg68139.00755	xyloglucan fucosyltransferase/Nodulation protein Z (NodZ)				0
bin13.ctg68139.00640	lipoyl(octanoyl) transferase LipB	bin13.ctg68139.00640	lipoyl(octanoyl) transferase LipB	Cofactor: Lipoic Acid			0
bin13.ctg68139.00682	glycosyltransferase family 39 protein	bin13.ctg68139.00682	glycosyltransferase family 39 protein	Modifying enzymes			0
bin13.ctg68139.00718	LL-diaminopimelate aminotransferase	bin13.ctg68139.00718	LL-diaminopimelate aminotransferase	Aminoacid biosynthesis			1e-05
bin13.ctg68139.00758	type II toxin-antitoxin system RelE/ParE family toxin	bin13.ctg68139.00758	type II toxin-antitoxin system RelE/ParE family toxin	Toxin antitoxin			0
bin13.ctg68139.00810	hypothetical protein	bin13.ctg68139.00810	hypothetical protein	Hypothetical protein			0
bin13.ctg68139.00853	SGNH/GDSL hydrolase family protein	bin13.ctg68139.00853	SGNH/GDSL hydrolase family protein	Modifying enzymes			1e-05
bin13.ctg68139.00890	exodeoxyribonuclease VII small subunit	bin13.ctg68139.00890	exodeoxyribonuclease VII small subunit	RNA processing			0
bin13.ctg68139.00937	hypothetical protein	bin13.ctg68139.00937	hypothetical protein	Hypothetical protein			3e-05
bin13.ctg68139.00937	hypothetical protein	bin13.ctg68160.00991	hypothetical protein	Hypothetical protein			3e-05
bin13.ctg68160.00979	penicillin-binding protein 1A	bin13.ctg68160.00979	penicillin-binding protein 1A	Cell wall			0
bin13.ctg68160.00979	penicillin-binding protein 1A	bin13.ctg68139.00925	penicillin-binding protein 1A	Cell wall			0
bin13.ctg68160.01030	MAG: protein phosphatase 2C domain-containing protein	bin13.ctg68160.01030	MAG: protein phosphatase 2C domain-containing protein	Stress response			1e-05
bin13.ctg68160.01079		bin13.ctg68160.01079					1e-05
bin13.ctg68160.01121	Mo-dependent nitrogenase C-terminal domain-containing protein	bin13.ctg68160.01121	Mo-dependent nitrogenase C-terminal domain-containing protein	Nitrogen cycle			5e-05
bin13.ctg68160.01176	glycosyltransferase	bin13.ctg68160.01176	glycosyltransferase	Modifying enzymes			0
bin13.ctg68160.01210	phosphoribosyltransferase	bin13.ctg68160.01210	phosphoribosyltransferase	Cofactor: Riboflavin (Vitamin B2)			4e-05
bin13.ctg68160.01250	hypothetical protein	bin13.ctg68160.01250	hypothetical protein	Hypothetical protein			1e-05
bin13.ctg68160.01371	precorrin-6y C5,15-methyltransferase (decarboxylating) subunit CbiE	bin13.ctg68160.01371	precorrin-6y C5,15-methyltransferase (decarboxylating) subunit CbiE	Cofactor: Cobalamin (Vitamin B12)			1e-05
bin13.ctg68160.01417	helix-turn-helix domain-containing protein	bin13.ctg68160.01417	helix-turn-helix domain-containing protein	Unknown			1e-05
bin13.ctg68160.01601	MAG: response regulator transcription factor	bin13.ctg68160.01601	MAG: response regulator transcription factor	Stress response			0
bin13.ctg68160.01652	hypothetical protein HLUCCO16_20810	bin13.ctg68160.01652	hypothetical protein HLUCCO16_20810	Hypothetical protein			0
bin13.ctg68160.01692	MAG: NUDIX hydrolase	bin13.ctg68160.01692	MAG: NUDIX hydrolase	Modifying enzymes			0
bin13.ctg68160.01781	OmpA family protein	bin13.ctg68160.01781	OmpA family protein	Transport			1e-05
bin13.ctg68160.01829	MAG: photosystem II reaction center protein K	bin13.ctg68160.01829	MAG: photosystem II reaction center protein K	Photosystems			0.0001
bin13.ctg68160.01829	MAG: photosystem II reaction center protein K	bin26.ctg33596.02393	MAG: photosystem II reaction center protein K	Photosystems	0.00028
bin13.ctg68160.01916	hypothetical protein	bin13.ctg68160.01916	hypothetical protein	Hypothetical protein			0
bin13.ctg68160.01962	hypothetical protein	bin13.ctg68160.01962	hypothetical protein	Hypothetical protein			1e-05
bin13.ctg68160.02003	phycobiliprotein lyase	bin13.ctg68160.02003	phycobiliprotein lyase	Phycocynin			0
bin13.ctg68160.02003	phycobiliprotein lyase	bin26.ctg33596.03114
bin13.ctg68160.02003	phycobiliprotein lyase	bin11.ctg196704.02258	phycobiliprotein lyase	Phycocynin		0
bin13.ctg68160.02045	anhydro-N-acetylmuramic acid kinase	bin13.ctg68160.02045	anhydro-N-acetylmuramic acid kinase	Cell wall			0
bin13.ctg68160.02130	CHAT domain/Tetratricopeptide repeat	bin13.ctg68160.02130	CHAT domain/Tetratricopeptide repeat	Defense			0
bin13.ctg68160.02169	alpha/beta hydrolase	bin13.ctg68160.02169	alpha/beta hydrolase	tRNA-dependent cyclodipeptide synthases			1e-05
bin13.ctg68160.02273	alpha/beta hydrolase	bin13.ctg68160.02273	alpha/beta hydrolase	tRNA-dependent cyclodipeptide synthases			0
bin13.ctg68160.02364	hypothetical protein	bin13.ctg68160.02364	hypothetical protein	Hypothetical protein			0
bin13.ctg68160.02364	hypothetical protein	bin13.ctg68176.02431	hypothetical protein	Hypothetical protein			0
bin13.ctg68176.02450	hypothetical protein	bin13.ctg68176.02450	hypothetical protein	Hypothetical protein			3e-05
bin13.ctg68176.02450	hypothetical protein	bin13.ctg68160.02383	hypothetical protein	Hypothetical protein			3e-05
bin13.ctg68176.02489	Uma2 family endonuclease	bin13.ctg68176.02489	Uma2 family endonuclease	RNA processing			4e-05
bin13.ctg68176.02530	lecithin retinol acyltransferase family protein	bin13.ctg68176.02530	lecithin retinol acyltransferase family protein	Non-ribisomal peptide synthetase			1e-05
bin13.ctg68176.02620	Re/Si-specific NAD(P)(+) transhydrogenase subunit alpha	bin13.ctg68176.02620	Re/Si-specific NAD(P)(+) transhydrogenase subunit alpha	Citric acid			3e-05
bin13.ctg68176.02661	pentapeptide repeat-containing protein	bin13.ctg68176.02661	pentapeptide repeat-containing protein	Resistance Genes			0.00286
bin13.ctg68176.02697	MAG: ABC transporter ATP-binding protein/permease	bin13.ctg68176.02697	MAG: ABC transporter ATP-binding protein/permease	Regulatory & Transport Genes			2e-05
bin13.ctg68176.02697	MAG: ABC transporter ATP-binding protein/permease	bin26.ctg33596.03830
bin13.ctg68176.02697	MAG: ABC transporter ATP-binding protein/permease	bin11.ctg196704.02564	MAG: ABC transporter ATP-binding protein/permease	Regulatory & Transport Genes		4e-05
bin13.ctg68176.02744	MAG: DNA mismatch repair endonuclease MutL	bin13.ctg68176.02744	MAG: DNA mismatch repair endonuclease MutL	Defense			0
bin13.ctg68176.02791	heterodisulfide reductase-related iron-sulfur binding cluster	bin13.ctg68176.02791	heterodisulfide reductase-related iron-sulfur binding cluster	Sulfur cycle			2e-05
bin13.ctg68176.02791	heterodisulfide reductase-related iron-sulfur binding cluster	bin26.ctg33596.03915	MAG: 4Fe-4S dicluster domain-containing protein		0
bin13.ctg68176.02834	Ppx/GppA family phosphatase	bin13.ctg68176.02834	Ppx/GppA family phosphatase	Stress response			1e-05
bin13.ctg68176.02874		bin13.ctg68176.02874					6e-05
bin13.ctg68176.02969	hypothetical protein	bin13.ctg68176.02969	hypothetical protein	Hypothetical protein			0
bin13.ctg68176.03008		bin13.ctg68176.03008					1e-05
bin13.ctg68176.03104	HEAT repeat domain-containing protein	bin13.ctg68176.03104	HEAT repeat domain-containing protein	Stress response			2e-05
bin13.ctg68176.03146	hypothetical protein	bin13.ctg68176.03146	hypothetical protein	Hypothetical protein			1e-05
bin13.ctg68176.03146	hypothetical protein	bin11.ctg196704.03802	hypothetical protein	Hypothetical protein		1e-05
bin13.ctg68176.03222	MAG: diflavin flavoprotein	bin13.ctg68176.03222	MAG: diflavin flavoprotein				4e-05
bin13.ctg68176.03256	transcriptional repressor	bin13.ctg68176.03256	transcriptional repressor	Regulatory & Transport Genes			1e-05
bin13.ctg68176.03296	hypothetical protein	bin13.ctg68176.03296	hypothetical protein	Hypothetical protein			6e-05
bin13.ctg68176.03347	glycosyltransferase family 2 protein	bin13.ctg68176.03347	glycosyltransferase family 2 protein	Modifying enzymes			1e-05
bin13.ctg68176.03386	MAG: hypothetical protein JWS08_13905	bin13.ctg68176.03386	MAG: hypothetical protein JWS08_13905	Hypothetical protein			7e-05
bin13.ctg68176.03386	MAG: hypothetical protein JWS08_13905	bin26.ctg33596.04637
bin13.ctg68176.03386	MAG: hypothetical protein JWS08_13905	bin11.ctg196704.03552	MAG: hypothetical protein JWS08_13905	Hypothetical protein		6e-05
bin13.ctg68176.03424	MAG: hypothetical protein JWS08_13965	bin13.ctg68176.03424	MAG: hypothetical protein JWS08_13965	Hypothetical protein			0
bin13.ctg68176.03473	DUF3747 domain-containing protein	bin13.ctg68176.03473	DUF3747 domain-containing protein	Unknown			2e-05
bin13.ctg68176.03514	ATPase	bin13.ctg68176.03514	ATPase				0
bin13.ctg68176.03554	thioredoxin family protein	bin13.ctg68176.03554	thioredoxin family protein	Stress response			4e-05
bin13.ctg68176.03716	MAG: Uma2 family endonuclease	bin13.ctg68176.03716	MAG: Uma2 family endonuclease	RNA processing			1e-05
bin13.ctg68176.03757	uroporphyrinogen-III C-methyltransferase	bin13.ctg68176.03757	uroporphyrinogen-III C-methyltransferase	Methylation			2e-05
bin13.ctg68176.03757	uroporphyrinogen-III C-methyltransferase	bin11.ctg196704.03333	uroporphyrinogen-III C-methyltransferase	Methylation		2e-05
bin13.ctg68176.03757	uroporphyrinogen-III C-methyltransferase	bin26.ctg33596.05028
bin13.ctg68176.03833	hypothetical protein	bin13.ctg68176.03833	hypothetical protein	Hypothetical protein			1e-05
bin13.ctg68176.03873	MAG: DUF928 domain-containing protein	bin13.ctg68176.03873	MAG: DUF928 domain-containing protein	Unknown			0
bin13.ctg68176.03873	MAG: DUF928 domain-containing protein	bin26.ctg33596.05249
bin13.ctg68176.03916	hypothetical protein	bin13.ctg68176.03916	hypothetical protein	Hypothetical protein			2e-05
bin13.ctg68176.03963	lipoate--protein ligase family protein	bin13.ctg68176.03963	lipoate--protein ligase family protein				4e-05
bin13.ctg68176.04003	MAG: HAD-IIB family hydrolase	bin13.ctg68176.04003	MAG: HAD-IIB family hydrolase	Modifying enzymes			1e-05
bin13.ctg68176.04050	GUN4 domain-containing protein	bin13.ctg68176.04050	GUN4 domain-containing protein				2e-05
bin13.ctg68176.04097	Protein of unknown function (DUF2281)	bin13.ctg68176.04097	Protein of unknown function (DUF2281)	Unknown			6e-05
bin13.ctg68176.04194	GDSL-type esterase/lipase family protein	bin13.ctg68176.04194	GDSL-type esterase/lipase family protein	Fatty acid			1e-05
bin13.ctg68176.04233	response regulator	bin13.ctg68176.04233	response regulator	Stress response			1e-05
bin13.ctg68176.04280	signal peptide peptidase SppA	bin13.ctg68176.04280	signal peptide peptidase SppA				1e-05
bin13.ctg68176.04319	PAS domain S-box protein	bin13.ctg68176.04319	PAS domain S-box protein	Regulatory & Transport Genes			0
bin13.ctg68176.04359	MAG: TIGR04376 family protein	bin13.ctg68176.04359	MAG: TIGR04376 family protein	Ribosomally synthesized and post-translationally modified peptide			6e-05
bin13.ctg68176.04359	MAG: TIGR04376 family protein	bin26.ctg33596.00002	MAG: TIGR04376 family protein	Ribosomally synthesized and post-translationally modified peptide	7e-05
bin13.ctg68176.04438	preprotein translocase subunit SecA	bin13.ctg68176.04438	preprotein translocase subunit SecA	Defense			0.00016
bin13.ctg68176.04490	photosystem II biogenesis protein Psp29	bin13.ctg68176.04490	photosystem II biogenesis protein Psp29	Photosystems			5e-05
bin13.ctg68176.04529	glycosyltransferase family 39 protein	bin13.ctg68176.04529	glycosyltransferase family 39 protein	Modifying enzymes			0.00036
bin13.ctg68176.04583	hypothetical protein HLUCCO16_04810	bin13.ctg68176.04583	hypothetical protein HLUCCO16_04810	Hypothetical protein			0
bin13.ctg68176.04629	BCD family MFS transporter	bin13.ctg68176.04629	BCD family MFS transporter	Regulatory & Transport Genes			0
bin13.ctg68176.04713	DUF1823 family protein	bin13.ctg68176.04713	DUF1823 family protein	Unknown			3e-05
bin13.ctg68176.04795	bifunctional riboflavin kinase/FAD synthetase	bin13.ctg68176.04795	bifunctional riboflavin kinase/FAD synthetase	Cofactor: Riboflavin (Vitamin B2)			1e-05
bin13.ctg68176.04839	hypothetical protein	bin13.ctg68176.04839	hypothetical protein	Hypothetical protein			1e-05
bin13.ctg68176.04919	MAG: winged helix-turn-helix domain-containing protein	bin13.ctg68176.04919	MAG: winged helix-turn-helix domain-containing protein	Unknown			0
bin13.ctg68176.04919	MAG: winged helix-turn-helix domain-containing protein	bin11.ctg196704.04742	MAG: winged helix-turn-helix domain-containing protein	Unknown		1e-05
bin13.ctg68176.04976	hypothetical protein	bin13.ctg68176.04976	hypothetical protein	Hypothetical protein			3e-05
bin13.ctg68176.05024	hypothetical protein E1H12_22220	bin13.ctg68176.05024	hypothetical protein E1H12_22220	Hypothetical protein			3e-05
bin13.ctg68139.00504	mannose-1-phosphate guanyltransferase	bin13.ctg68139.00504	mannose-1-phosphate guanyltransferase				3e-05
bin13.ctg68139.00504	mannose-1-phosphate guanyltransferase	bin11.ctg196704.00522	mannose-1-phosphate guanylyltransferase			3e-05
bin13.ctg68139.00504	mannose-1-phosphate guanyltransferase	bin26.ctg33596.01796
bin13.ctg68139.00549	ribonuclease III	bin13.ctg68139.00549	ribonuclease III	RNA processing			0.00011
bin13.ctg68139.00603	cysteine desulfurase	bin13.ctg68139.00603	cysteine desulfurase	Aminoacid biosynthesis			0
bin13.ctg68139.00643	UbiD family decarboxylase	bin13.ctg68139.00643	UbiD family decarboxylase	Cofactor: Ubiquinol (CoQ)			2e-05
bin13.ctg68139.00643	UbiD family decarboxylase	bin11.ctg196704.00643	MAG: UbiD family decarboxylase	Cofactor: Ubiquinol (CoQ)		1e-05
bin13.ctg68139.00643	UbiD family decarboxylase	bin26.ctg33596.01862	MAG: UbiD family decarboxylase	Cofactor: Ubiquinol (CoQ)	3e-05
bin13.ctg68139.00686	CPBP family intramembrane metalloprotease	bin13.ctg68139.00686	CPBP family intramembrane metalloprotease	Stress response			0.0002
bin13.ctg68139.00721	hypothetical protein	bin13.ctg68139.00721	hypothetical protein	Hypothetical protein			0.0002
bin13.ctg68139.00815	methionine--tRNA ligase	bin13.ctg68139.00815	methionine--tRNA ligase	tRNA			8e-05
bin13.ctg68139.00857	hypothetical protein	bin13.ctg68139.00857	hypothetical protein	Hypothetical protein			0
bin13.ctg68139.00940	glycoside hydrolase	bin13.ctg68139.00940	glycoside hydrolase	Modifying enzymes			1e-05
bin13.ctg68160.00982	YebC/PmpR family DNA-binding transcriptional regulator	bin13.ctg68160.00982	YebC/PmpR family DNA-binding transcriptional regulator	Regulatory & Transport Genes			1e-05
bin13.ctg68160.00982	YebC/PmpR family DNA-binding transcriptional regulator	bin13.ctg68139.00928	YebC/PmpR family DNA-binding transcriptional regulator	Regulatory & Transport Genes			1e-05
bin13.ctg68160.01033	high light inducible protein	bin13.ctg68160.01033	high light inducible protein				1e-05
bin13.ctg68160.01083	MAG: exopolysaccharide biosynthesis protein	bin13.ctg68160.01083	MAG: exopolysaccharide biosynthesis protein				1e-05
bin13.ctg68160.01124	fibronectin-binding domain-containing protein	bin13.ctg68160.01124	fibronectin-binding domain-containing protein				0
bin13.ctg68160.01179	pentapeptide repeat-containing protein	bin13.ctg68160.01179	pentapeptide repeat-containing protein	Resistance Genes			0
bin13.ctg68160.01214	ferredoxin	bin13.ctg68160.01214	ferredoxin	Photosystems			0.00019
bin13.ctg68160.01421	SpoIIE family protein phosphatase	bin13.ctg68160.01421	SpoIIE family protein phosphatase	Stress response			0
bin13.ctg68160.01465	acylphosphatase	bin13.ctg68160.01465	acylphosphatase				1e-05
bin13.ctg68160.01561	hypothetical protein	bin13.ctg68160.01561	hypothetical protein	Hypothetical protein			3e-05
bin13.ctg68160.01604	response regulator	bin13.ctg68160.01604	response regulator	Stress response			0
bin13.ctg68160.01656	hypothetical protein	bin13.ctg68160.01656	hypothetical protein	Hypothetical protein			0
bin13.ctg68160.01747	hypothetical protein E1H12_18600	bin13.ctg68160.01747	hypothetical protein E1H12_18600	Hypothetical protein			0
bin13.ctg68160.01789	diguanylate cyclase	bin13.ctg68160.01789	diguanylate cyclase	Regulatory & Transport Genes			1e-05
bin13.ctg68160.01834	ATP-binding cassette domain-containing protein	bin13.ctg68160.01834	ATP-binding cassette domain-containing protein	Defense			1e-05
bin13.ctg68160.01834	ATP-binding cassette domain-containing protein	bin11.ctg196704.01070	MAG: ATP-binding cassette domain-containing protein	Defense		1e-05
bin13.ctg68160.01834	ATP-binding cassette domain-containing protein	bin26.ctg33596.02389	MAG: ATP-binding cassette domain-containing protein	Defense	1e-05
bin13.ctg68160.01882	DUF928 domain-containing protein	bin13.ctg68160.01882	DUF928 domain-containing protein	Unknown			0
bin13.ctg68160.01919	MarR family transcriptional regulator	bin13.ctg68160.01919	MarR family transcriptional regulator	Regulatory & Transport Genes			0
bin13.ctg68160.01968	hypothetical protein	bin13.ctg68160.01968	hypothetical protein	Hypothetical protein			2e-05
bin13.ctg68160.02006	MAG: hormogonium polysaccharide biosynthesis acetyltransferase HpsU	bin13.ctg68160.02006	MAG: hormogonium polysaccharide biosynthesis acetyltransferase HpsU				1e-05
bin13.ctg68160.02050	phosphoadenosine phosphosulfate reductase	bin13.ctg68160.02050	phosphoadenosine phosphosulfate reductase	Sulfur cycle			1e-05
bin13.ctg68160.02093	MAG: hypothetical protein JWS08_08215	bin13.ctg68160.02093	MAG: hypothetical protein JWS08_08215	Hypothetical protein			1e-05
bin13.ctg68160.02135	MAG: IS200/IS605 family accessory protein TnpB-related protein	bin13.ctg68160.02135	MAG: IS200/IS605 family accessory protein TnpB-related protein	Transposase			4e-05
bin13.ctg68160.02216	glycosyltransferase family 2 protein	bin13.ctg68160.02216	glycosyltransferase family 2 protein	Modifying enzymes			1e-05
bin13.ctg68160.02276	MAG: GAF domain-containing protein	bin13.ctg68160.02276	MAG: GAF domain-containing protein				1e-05
bin13.ctg68176.02418	DUF262 domain-containing HNH endonuclease family protein	bin13.ctg68176.02418	DUF262 domain-containing HNH endonuclease family protein	Unknown			0
bin13.ctg68176.02418	DUF262 domain-containing HNH endonuclease family protein	bin13.ctg68160.02351	DUF262 domain-containing HNH endonuclease family protein	Unknown			0
bin13.ctg68176.02453	SpoIIE family protein phosphatase	bin13.ctg68176.02453	SpoIIE family protein phosphatase	Stress response			1e-05
bin13.ctg68176.02453	SpoIIE family protein phosphatase	bin13.ctg68160.02386	SpoIIE family protein phosphatase	Stress response			1e-05
bin13.ctg68176.02494	MAG: oxygen-independent coproporphyrinogen III oxidase	bin13.ctg68176.02494	MAG: oxygen-independent coproporphyrinogen III oxidase	Cofactor: Heme/Siroheme			0
bin13.ctg68176.02494	MAG: oxygen-independent coproporphyrinogen III oxidase	bin26.ctg33596.03621
bin13.ctg68176.02494	MAG: oxygen-independent coproporphyrinogen III oxidase	bin11.ctg196704.02275	MAG: oxygen-independent coproporphyrinogen III oxidase	Cofactor: Heme/Siroheme		0
bin13.ctg68176.02536	MAG: AAA family ATPase	bin13.ctg68176.02536	MAG: AAA family ATPase	Regulatory & Transport Genes			2e-05
bin13.ctg68176.02536	MAG: AAA family ATPase	bin11.ctg196704.02395	MAG: AAA family ATPase	Regulatory & Transport Genes		3e-05
bin13.ctg68176.02536	MAG: AAA family ATPase	bin26.ctg33596.03675	MAG: AAA family ATPase	Regulatory & Transport Genes	1e-05
bin13.ctg68176.02623	ribonuclease P protein component	bin13.ctg68176.02623	ribonuclease P protein component	RNA processing			0.00011
bin13.ctg68176.02747		bin13.ctg68176.02747					0
bin13.ctg68176.02799	glycosyltransferase	bin13.ctg68176.02799	glycosyltransferase	Modifying enzymes			0
bin13.ctg68176.02837	AhpC/TSA family protein	bin13.ctg68176.02837	AhpC/TSA family protein				0
bin13.ctg68176.02881	hypothetical protein	bin13.ctg68176.02881	hypothetical protein	Hypothetical protein			0
bin13.ctg68176.02924	DUF4149 domain-containing protein	bin13.ctg68176.02924	DUF4149 domain-containing protein	Unknown			0.00353
bin13.ctg68176.02972	response regulator transcription factor	bin13.ctg68176.02972	response regulator transcription factor	Stress response			1e-05
bin13.ctg68176.03022	ATPases of the AAA+ class	bin13.ctg68176.03022	ATPases of the AAA+ class				0
bin13.ctg68176.03022	ATPases of the AAA+ class	bin26.ctg33596.04148
bin13.ctg68176.03063	pentapeptide repeat-containing protein	bin13.ctg68176.03063	pentapeptide repeat-containing protein	Resistance Genes			0
bin13.ctg68176.03108	hypothetical protein HLUCCO16_08655	bin13.ctg68176.03108	hypothetical protein HLUCCO16_08655	Hypothetical protein			0
bin13.ctg68176.03149	adenylyltransferase/cytidyltransferase family protein	bin13.ctg68176.03149	adenylyltransferase/cytidyltransferase family protein				1e-05
bin13.ctg68176.03187	glycosyltransferase	bin13.ctg68176.03187	glycosyltransferase	Modifying enzymes			0
bin13.ctg68176.03187	glycosyltransferase	bin26.ctg33596.04433
bin13.ctg68176.03226	restriction endonuclease	bin13.ctg68176.03226	restriction endonuclease				0
bin13.ctg68176.03299	mechanosensitive ion channel	bin13.ctg68176.03299	mechanosensitive ion channel	Stress response			0
bin13.ctg68176.03351	NADAR family protein	bin13.ctg68176.03351	NADAR family protein	Citric acid			0
bin13.ctg68176.03427	DUF87 domain-containing protein	bin13.ctg68176.03427	DUF87 domain-containing protein	Unknown			1e-05
bin13.ctg68176.03522	alpha/beta hydrolase	bin13.ctg68176.03522	alpha/beta hydrolase	tRNA-dependent cyclodipeptide synthases			0
bin13.ctg68176.03522	alpha/beta hydrolase	bin26.ctg33596.04781
bin13.ctg68176.03608	MAG: hypothetical protein JWS08_14775	bin13.ctg68176.03608	MAG: hypothetical protein JWS08_14775	Hypothetical protein			1e-05
bin13.ctg68176.03760	ATP-binding protein	bin13.ctg68176.03760	ATP-binding protein				0
bin13.ctg68176.03760	ATP-binding protein	bin11.ctg196704.03336	ATP-binding protein			1e-05
bin13.ctg68176.03799	MAG: SDR family NAD(P)-dependent oxidoreductase	bin13.ctg68176.03799	MAG: SDR family NAD(P)-dependent oxidoreductase	Citric acid			0
bin13.ctg68176.03836	ATP-dependent DNA helicase RecG	bin13.ctg68176.03836	ATP-dependent DNA helicase RecG	Defense			0
bin13.ctg68176.03878	diguanylate cyclase	bin13.ctg68176.03878	diguanylate cyclase	Regulatory & Transport Genes			0.00042
bin13.ctg68176.03921	MAG: DUF1818 family protein	bin13.ctg68176.03921	MAG: DUF1818 family protein	Unknown			0
bin13.ctg68176.03921	MAG: DUF1818 family protein	bin26.ctg33596.05302
bin13.ctg68176.03968	translational GTPase TypA	bin13.ctg68176.03968	translational GTPase TypA	Ribosomal Proteins			4e-05
bin13.ctg68176.03968	translational GTPase TypA	bin26.ctg33596.05331	MAG: translational GTPase TypA	Ribosomal Proteins	9e-05
bin13.ctg68176.03968	translational GTPase TypA	bin11.ctg196704.04450	translational GTPase TypA	Ribosomal Proteins		4e-05
bin13.ctg68176.04007	type II secretion system GspH family protein	bin13.ctg68176.04007	type II secretion system GspH family protein	Transport			0.00012
bin13.ctg68176.04053	rod shape-determining protein MreC	bin13.ctg68176.04053	rod shape-determining protein MreC	Cell wall			6e-05
bin13.ctg68176.04100	hypothetical protein AP9108_18895	bin13.ctg68176.04100	hypothetical protein AP9108_18895	Hypothetical protein			1e-05
bin13.ctg68176.04142	GAF domain-containing protein	bin13.ctg68176.04142	GAF domain-containing protein				0.00027
bin13.ctg68176.04198	N-acetylglucosamine-6-phosphate deacetylase	bin13.ctg68176.04198	N-acetylglucosamine-6-phosphate deacetylase				2e-05
bin13.ctg68176.04283	adenylate/guanylate cyclase domain-containing protein	bin13.ctg68176.04283	adenylate/guanylate cyclase domain-containing protein				1e-05
bin13.ctg68176.04324	MAG: transposase	bin13.ctg68176.04324	MAG: transposase	Transposase			2e-05
bin13.ctg68176.04364	MAG: hypothetical protein JWS08_17425	bin13.ctg68176.04364	MAG: hypothetical protein JWS08_17425	Hypothetical protein			0
bin13.ctg68176.04447	MAG: nucleotidyltransferase domain-containing protein	bin13.ctg68176.04447	MAG: nucleotidyltransferase domain-containing protein				0
bin26.ctg33596.00501		bin26.ctg33596.00501
bin26.ctg33596.00501		bin13.ctg68176.04605	ABC transporter ATP-binding protein	Regulatory & Transport Genes			1e-05
bin26.ctg33596.00501		bin11.ctg196704.04473	MAG: ABC transporter ATP-binding protein	Regulatory & Transport Genes		1e-05
bin26.ctg33596.00549	MAG: phosphate signaling complex protein PhoU	bin26.ctg33596.00549	MAG: phosphate signaling complex protein PhoU		4e-05
bin26.ctg33596.00549	MAG: phosphate signaling complex protein PhoU	bin11.ctg196704.04322	MAG: phosphate signaling complex protein PhoU			1e-05
bin26.ctg33596.00634		bin26.ctg33596.00634
bin26.ctg33596.00667		bin26.ctg33596.00667
bin26.ctg33596.00712	MAG: glycosyltransferase	bin26.ctg33596.00712	MAG: glycosyltransferase	Modifying enzymes	0.00018
bin26.ctg33596.00798		bin26.ctg33596.00798
bin26.ctg33596.00798		bin11.ctg196704.05013	MAG: carotenoid oxygenase family protein	Terpenoids		4e-05
bin26.ctg33596.00798		bin13.ctg68176.05200	MAG: carotenoid oxygenase family protein	Terpenoids			4e-05
bin26.ctg33596.00881		bin26.ctg33596.00881
bin26.ctg33596.00881		bin11.ctg196704.05097	MAG: malto-oligosyltrehalose synthase			0
bin26.ctg33596.00924		bin26.ctg33596.00924
bin26.ctg33596.00924		bin11.ctg196704.05281	MAG: isoaspartyl peptidase/L-asparaginase			1e-05
bin26.ctg33596.00972	MAG: methionine gamma-lyase family protein	bin26.ctg33596.00972	MAG: methionine gamma-lyase family protein	Modifying enzymes	4e-05
bin26.ctg33596.00972	MAG: methionine gamma-lyase family protein	bin11.ctg196704.05223	MAG: methionine gamma-lyase family protein	Modifying enzymes		6e-05
bin26.ctg33596.01005		bin26.ctg33596.01005
bin26.ctg33596.01005		bin11.ctg196704.05190	MAG: hypothetical protein JWS08_21400	Hypothetical protein		0
bin26.ctg33596.01102		bin26.ctg33596.01102
bin26.ctg33596.01144		bin26.ctg33596.01144
bin26.ctg33596.01179		bin26.ctg33596.01179
bin26.ctg33596.01179		bin11.ctg196704.05489	TldD/PmbA family protein	Ribosomally synthesized and post-translationally modified peptide		1e-05
bin26.ctg33596.01220		bin26.ctg33596.01220
bin26.ctg33596.01261	manganese efflux pump MntP family protein	bin26.ctg33596.01261	manganese efflux pump MntP family protein	Regulatory & Transport Genes	1e-05
bin26.ctg33596.01261	manganese efflux pump MntP family protein	bin11.ctg196704.05406	manganese efflux pump MntP family protein	Regulatory & Transport Genes		1e-05
bin26.ctg33596.01302		bin26.ctg33596.01302
bin26.ctg33596.01302		bin11.ctg196704.05538	MAG: helix-turn-helix domain-containing protein	Unknown		0
bin26.ctg33596.01343		bin26.ctg33596.01343
bin26.ctg33596.01386	UDP-N-acetylmuramate--L-alanine ligase	bin26.ctg33596.01386	UDP-N-acetylmuramate--L-alanine ligase	Cell wall	2e-05
bin26.ctg33596.01421		bin26.ctg33596.01421
bin26.ctg33596.01459		bin26.ctg33596.01459
bin26.ctg33596.01500	glycosyltransferase	bin26.ctg33596.01500	glycosyltransferase	Modifying enzymes	3e-05
bin26.ctg33596.01544		bin26.ctg33596.01544
bin26.ctg33596.01544		bin11.ctg196704.05790	MAG: circadian clock protein KaiA			1e-05
bin26.ctg33596.01590	MAG: precorrin-4 C(11)-methyltransferase	bin26.ctg33596.01590	MAG: precorrin-4 C(11)-methyltransferase	Cofactor: Cobalamin (Vitamin B12)	0.0001
bin26.ctg33596.01630		bin26.ctg33596.01630
bin26.ctg33596.01679	MAG: nitrate ABC transporter permease	bin26.ctg33596.01679	MAG: nitrate ABC transporter permease	Nitrogen cycle	5e-05
bin26.ctg33596.01679	MAG: nitrate ABC transporter permease	bin11.ctg196704.05905	MAG: nitrate ABC transporter permease	Nitrogen cycle		1e-05
bin26.ctg33596.01735	MAG: M28 family peptidase	bin26.ctg33596.01735	MAG: M28 family peptidase	Ribosomally synthesized and post-translationally modified peptide	6e-05
bin26.ctg33596.01778		bin26.ctg33596.01778
bin26.ctg33596.01778		bin11.ctg196704.00503	MAG: thiamine phosphate synthase	Cofactor: Thiamine (Vitamin B1)		2e-05
bin26.ctg33596.01815		bin26.ctg33596.01815
bin26.ctg33596.01815		bin13.ctg68139.00528	TldD protein				2e-05
bin26.ctg33596.01815		bin11.ctg196704.00538	MAG: TldD/PmbA family protein	Ribosomally synthesized and post-translationally modified peptide		2e-05
bin26.ctg33596.01858		bin26.ctg33596.01858			0.0038
bin26.ctg33596.01858		bin11.ctg196704.00639				0.00367
bin26.ctg33596.01899	MAG: GuaB3 family IMP dehydrogenase-related protein	bin26.ctg33596.01899	MAG: GuaB3 family IMP dehydrogenase-related protein	Cofactor: Others	8e-05
bin26.ctg33596.01985		bin26.ctg33596.01985
bin26.ctg33596.02025		bin26.ctg33596.02025
bin26.ctg33596.02025		bin11.ctg196704.00893	MAG: hypothetical protein JWS08_03600	Hypothetical protein		0
bin26.ctg33596.02068	MAG: protochlorophyllide reductase	bin26.ctg33596.02068	MAG: protochlorophyllide reductase	Photosystems	9e-05
bin26.ctg33596.02068	MAG: protochlorophyllide reductase	bin11.ctg196704.00885	protochlorophyllide reductase	Photosystems		0.0001
bin26.ctg33596.02068	MAG: protochlorophyllide reductase	bin13.ctg68139.00893	protochlorophyllide reductase	Photosystems			2e-05
bin26.ctg33596.02104		bin26.ctg33596.02104
bin26.ctg33596.02104		bin11.ctg196704.00777	MAG: response regulator	Stress response		0
bin26.ctg33596.02152	MAG: radical SAM protein	bin26.ctg33596.02152	MAG: radical SAM protein	Ribosomally synthesized and post-translationally modified peptide	1e-05
bin26.ctg33596.02152	MAG: radical SAM protein	bin11.ctg196704.00939	MAG: radical SAM protein	Ribosomally synthesized and post-translationally modified peptide		2e-05
bin26.ctg33596.02277	MAG: DUF3172 domain-containing protein	bin26.ctg33596.02277	MAG: DUF3172 domain-containing protein	Unknown	7e-05
bin26.ctg33596.02277	MAG: DUF3172 domain-containing protein	bin11.ctg196704.01003	MAG: DUF3172 domain-containing protein	Unknown		0.00015
bin26.ctg33596.02367	MAG: glycosyltransferase family 2 protein	bin26.ctg33596.02367	MAG: glycosyltransferase family 2 protein	Modifying enzymes	0.00011
bin26.ctg33596.02367	MAG: glycosyltransferase family 2 protein	bin13.ctg68160.01107	glycosyltransferase family 2 protein	Modifying enzymes			8e-05
bin26.ctg33596.02367	MAG: glycosyltransferase family 2 protein	bin11.ctg196704.01049	MAG: glycosyltransferase family 2 protein	Modifying enzymes		0.0001
bin26.ctg33596.02408		bin26.ctg33596.02408
bin26.ctg33596.02486		bin26.ctg33596.02486
bin26.ctg33596.02486		bin11.ctg196704.01175	MAG: mechanosensitive ion channel	Stress response		1e-05
bin26.ctg33596.02524	MAG: diguanylate cyclase	bin26.ctg33596.02524	MAG: diguanylate cyclase	Regulatory & Transport Genes	1e-05
bin26.ctg33596.02524	MAG: diguanylate cyclase	bin11.ctg196704.01210	MAG: diguanylate cyclase	Regulatory & Transport Genes		0.00018
bin26.ctg33596.02562		bin26.ctg33596.02562
bin26.ctg33596.02601	killer suppression protein HigA	bin26.ctg33596.02601	killer suppression protein HigA	Toxin antitoxin	6e-05
bin26.ctg33596.02647		bin26.ctg33596.02647
bin26.ctg33596.02698		bin26.ctg33596.02698
bin26.ctg33596.02698		bin11.ctg196704.01391	MAG: folate/biopterin family MFS transporter	Regulatory & Transport Genes		2e-05
bin26.ctg33596.02744		bin26.ctg33596.02744
bin26.ctg33596.02789	MAG: DUF3611 family protein	bin26.ctg33596.02789	MAG: DUF3611 family protein	Unknown	4e-05
bin26.ctg33596.02831		bin26.ctg33596.02831
bin26.ctg33596.02831		bin11.ctg196704.01512	NDP-sugar synthase			4e-05
bin26.ctg33596.02831		bin13.ctg68160.01374	NDP-sugar synthase				2e-05
bin26.ctg33596.02903		bin26.ctg33596.02903
bin26.ctg33596.02903		bin11.ctg196704.01592	putative CRISPR-associated protein, APE2256 family	Defense		0
bin26.ctg33596.02940		bin26.ctg33596.02940
bin26.ctg33596.02940		bin11.ctg196704.01634	MAG: 5'/3'-nucleotidase SurE	Nitrogen cycle		1e-05
bin26.ctg33596.02983		bin26.ctg33596.02983
bin26.ctg33596.02983		bin11.ctg196704.01680	phosphoribosyltransferase	Cofactor: Riboflavin (Vitamin B2)		3e-05
bin26.ctg33596.03109	MAG: NAD-dependent succinate-semialdehyde dehydrogenase	bin26.ctg33596.03109	MAG: NAD-dependent succinate-semialdehyde dehydrogenase	Citric acid	0.00015
bin26.ctg33596.03109	MAG: NAD-dependent succinate-semialdehyde dehydrogenase	bin11.ctg196704.01796	MAG: NAD-dependent succinate-semialdehyde dehydrogenase	Citric acid		0.00016
bin26.ctg33596.03145		bin26.ctg33596.03145
bin26.ctg33596.03145		bin11.ctg196704.02222	MAG: anhydro-N-acetylmuramic acid kinase	Cell wall		0
bin26.ctg33596.03189		bin26.ctg33596.03189
bin26.ctg33596.03227		bin26.ctg33596.03227
bin13.ctg68176.02462	MAG: iron-sulfur cluster assembly accessory protein	bin13.ctg68176.02462	MAG: iron-sulfur cluster assembly accessory protein	Sulfur cycle			1e-05
bin13.ctg68176.02502	hypothetical protein HLUCCO16_17780	bin13.ctg68176.02502	hypothetical protein HLUCCO16_17780	Hypothetical protein			0
bin13.ctg68176.02585	DMT family transporter	bin13.ctg68176.02585	DMT family transporter	Transport			2e-05
bin13.ctg68176.02631	Photosystem I reaction center subunit III	bin13.ctg68176.02631	Photosystem I reaction center subunit III	Photosystems			0.00068
bin13.ctg68176.02631	Photosystem I reaction center subunit III	bin26.ctg33596.03757	MAG: Photosystem I reaction center subunit III	Photosystems	0.00049
bin13.ctg68176.02631	Photosystem I reaction center subunit III	bin11.ctg196704.02495	Photosystem I reaction center subunit III	Photosystems		0.00286
bin13.ctg68176.02674	hypothetical protein	bin13.ctg68176.02674	hypothetical protein	Hypothetical protein			2e-05
bin13.ctg68176.02716	CHAT domain-containing protein	bin13.ctg68176.02716	CHAT domain-containing protein	Defense			5e-05
bin13.ctg68176.02754	MAG: Uma2 family endonuclease	bin13.ctg68176.02754	MAG: Uma2 family endonuclease	RNA processing			0
bin13.ctg68176.02808	hypothetical protein	bin13.ctg68176.02808	hypothetical protein	Hypothetical protein			8e-05
bin13.ctg68176.02891	tetratricopeptide repeat protein	bin13.ctg68176.02891	tetratricopeptide repeat protein	Defense			0
bin13.ctg68176.02933		bin13.ctg68176.02933					0
bin13.ctg68176.02979	DUF3134 domain-containing protein	bin13.ctg68176.02979	DUF3134 domain-containing protein	Unknown			1e-05
bin13.ctg68176.02979	DUF3134 domain-containing protein	bin11.ctg196704.02852	DUF3134 domain-containing protein	Unknown		1e-05
bin13.ctg68176.02979	DUF3134 domain-containing protein	bin26.ctg33596.04113
bin13.ctg68176.03029	RNA-directed DNA polymerase	bin13.ctg68176.03029	RNA-directed DNA polymerase				0
bin13.ctg68176.03076		bin13.ctg68176.03076					2e-05
bin13.ctg68176.03116	MAG: FAD-binding oxidoreductase	bin13.ctg68176.03116	MAG: FAD-binding oxidoreductase	Regulatory & Transport Genes			0
bin13.ctg68176.03156	isochorismate synthase	bin13.ctg68176.03156	isochorismate synthase	Siderophore			0.00832
bin13.ctg68176.03194	tRNA (guanine-N1)-methyltransferase	bin13.ctg68176.03194	tRNA (guanine-N1)-methyltransferase	Methylation			1e-05
bin13.ctg68176.03234	hypothetical protein	bin13.ctg68176.03234	hypothetical protein	Hypothetical protein			5e-05
bin13.ctg68176.03307	DUF2442 domain-containing protein	bin13.ctg68176.03307	DUF2442 domain-containing protein	Unknown			0
bin13.ctg68176.03361	CBS domain-containing protein	bin13.ctg68176.03361	CBS domain-containing protein	Stress response			0.00065
bin13.ctg68176.03437	MAG: alpha/beta hydrolase	bin13.ctg68176.03437	MAG: alpha/beta hydrolase	tRNA-dependent cyclodipeptide synthases			1e-05
bin13.ctg68176.03570	MAG: cytochrome c biogenesis protein	bin13.ctg68176.03570	MAG: cytochrome c biogenesis protein	Respiration			1e-05
bin13.ctg68176.03732	MAG: Fe-S cluster assembly protein NifU	bin13.ctg68176.03732	MAG: Fe-S cluster assembly protein NifU	Nitrogen cycle			0
bin13.ctg68176.03767	nitrate ABC transporter permease	bin13.ctg68176.03767	nitrate ABC transporter permease	Nitrogen cycle			1e-05
bin13.ctg68176.03810		bin13.ctg68176.03810					1e-05
bin13.ctg68176.03844	PAS domain S-box protein	bin13.ctg68176.03844	PAS domain S-box protein	Regulatory & Transport Genes			0
bin13.ctg68176.03886	(2Fe-2S)-binding protein	bin13.ctg68176.03886	(2Fe-2S)-binding protein				1e-05
bin13.ctg68176.03886	(2Fe-2S)-binding protein	bin26.ctg33596.05273	(2Fe-2S)-binding protein		2e-05
bin13.ctg68176.03886	(2Fe-2S)-binding protein	bin11.ctg196704.03857	(2Fe-2S)-binding protein			5e-05
bin13.ctg68176.04016	MAG: response regulator	bin13.ctg68176.04016	MAG: response regulator	Stress response			5e-05
bin13.ctg68176.04063	Fe(3+) ABC transporter substrate-binding protein	bin13.ctg68176.04063	Fe(3+) ABC transporter substrate-binding protein	Regulatory & Transport Genes			0
bin13.ctg68176.04150	type II toxin-antitoxin system Phd/YefM family antitoxin	bin13.ctg68176.04150	type II toxin-antitoxin system Phd/YefM family antitoxin	Toxin antitoxin			1e-05
bin13.ctg68176.04248	hypothetical protein	bin13.ctg68176.04248	hypothetical protein	Hypothetical protein			0
bin13.ctg68176.04291	amino acid adenylation domain-containing protein	bin13.ctg68176.04291	amino acid adenylation domain-containing protein	Non-ribisomal peptide synthetase			0
bin13.ctg68176.04291	amino acid adenylation domain-containing protein	bin11.ctg174354.00129	amino acid adenylation domain-containing protein	Non-ribisomal peptide synthetase		0
bin13.ctg68176.04291	amino acid adenylation domain-containing protein	bin11.ctg196704.04126	amino acid adenylation domain-containing protein	Non-ribisomal peptide synthetase		0
bin13.ctg68176.04291	amino acid adenylation domain-containing protein	bin26.ctg33596.05527
bin13.ctg68176.04334	hypothetical protein E1H12_06485	bin13.ctg68176.04334	hypothetical protein E1H12_06485	Hypothetical protein			1e-05
bin13.ctg68176.04372	MAG: magnesium transporter	bin13.ctg68176.04372	MAG: magnesium transporter	Transport			0.00024
bin13.ctg68176.04409	lysylphosphatidylglycerol synthase domain-containing protein	bin13.ctg68176.04409	lysylphosphatidylglycerol synthase domain-containing protein				0
bin13.ctg68176.04454	trifunctional serine/threonine-protein kinase/ATP-binding protein/sensor histidine kinase	bin13.ctg68176.04454	trifunctional serine/threonine-protein kinase/ATP-binding protein/sensor histidine kinase	Aminoacid biosynthesis			1e-05
bin13.ctg68176.04503	HDIG domain-containing protein	bin13.ctg68176.04503	HDIG domain-containing protein				1e-05
bin13.ctg68176.04596	Circadian oscillating protein COP23	bin13.ctg68176.04596	Circadian oscillating protein COP23	Nitrogen cycle			0.00037
bin13.ctg68176.04643	CHAD domain-containing protein	bin13.ctg68176.04643	CHAD domain-containing protein				1e-05
bin13.ctg68176.04686	MAG: aspartate 1-decarboxylase	bin13.ctg68176.04686	MAG: aspartate 1-decarboxylase				0.00019
bin13.ctg68176.04686	MAG: aspartate 1-decarboxylase	bin11.ctg196704.04647	MAG: aspartate 1-decarboxylase			9e-05
bin13.ctg68176.04686	MAG: aspartate 1-decarboxylase	bin26.ctg33596.00433	MAG: aspartate 1-decarboxylase		0.00022
bin13.ctg68176.04770	BON domain-containing protein	bin13.ctg68176.04770	BON domain-containing protein	Unknown			0
bin13.ctg68176.04810	MAG: hypothetical protein JWS08_18835	bin13.ctg68176.04810	MAG: hypothetical protein JWS08_18835	Hypothetical protein			0
bin13.ctg68176.04852	ABC transporter ATP-binding protein	bin13.ctg68176.04852	ABC transporter ATP-binding protein	Regulatory & Transport Genes			1e-05
bin13.ctg68176.04938	hypothetical protein	bin13.ctg68176.04938	hypothetical protein	Hypothetical protein			8e-05
bin13.ctg68176.04990		bin13.ctg68176.04990					3e-05
bin13.ctg68176.05037	imidazole glycerol phosphate synthase subunit HisF	bin13.ctg68176.05037	imidazole glycerol phosphate synthase subunit HisF	Aminoacid biosynthesis			0
bin13.ctg68176.05074	hypothetical protein	bin13.ctg68176.05074	hypothetical protein	Hypothetical protein			0
bin13.ctg68176.05127	serine/threonine protein kinase	bin13.ctg68176.05127	serine/threonine protein kinase	Aminoacid biosynthesis			0.00024
bin13.ctg68176.05211	MAG: hypothetical protein JWS08_20575	bin13.ctg68176.05211	MAG: hypothetical protein JWS08_20575	Hypothetical protein			0
bin13.ctg68176.05211	MAG: hypothetical protein JWS08_20575	bin26.ctg33596.00809
bin13.ctg68176.05211	MAG: hypothetical protein JWS08_20575	bin11.ctg90070.06029	MAG: hypothetical protein JWS08_20575	Hypothetical protein		0
bin13.ctg68176.05211	MAG: hypothetical protein JWS08_20575	bin11.ctg196704.05026	MAG: hypothetical protein JWS08_20575	Hypothetical protein		0
bin13.ctg68176.05257	cell division topological specificity factor MinE	bin13.ctg68176.05257	cell division topological specificity factor MinE	Cell wall			1e-05
bin13.ctg68176.05322	allophycocyanin	bin13.ctg68176.05322	allophycocyanin	Phycocynin			0.00137
bin13.ctg68176.05322	allophycocyanin	bin11.ctg196704.05179	allophycocyanin	Phycocynin		0.00231
bin13.ctg68176.05322	allophycocyanin	bin26.ctg33596.00896	MAG: allophycocyanin subunit alpha	Phycocynin	0.00183
bin13.ctg68176.05364	YdcF family protein	bin13.ctg68176.05364	YdcF family protein				1e-05
bin13.ctg68176.05408	ferredoxin-NADP reductase	bin13.ctg68176.05408	ferredoxin-NADP reductase	Citric acid			0.00025
bin13.ctg68176.05443	sacsin SacS	bin13.ctg68176.05443	sacsin SacS				0
bin13.ctg68176.05494		bin13.ctg68176.05494					0
bin13.ctg68176.05540	caspase family protein	bin13.ctg68176.05540	caspase family protein	Defense			0
bin13.ctg68176.05627	chemotaxis protein CheW	bin13.ctg68176.05627	chemotaxis protein CheW	Motility			2e-05
bin13.ctg68176.05665	hypothetical protein	bin13.ctg68176.05665	hypothetical protein	Hypothetical protein			0
bin13.ctg68176.05704	aldo/keto reductase	bin13.ctg68176.05704	aldo/keto reductase	Xentibiotic biodegradation and metabolism			0
bin26.ctg33596.00058		bin26.ctg33596.00058
bin26.ctg33596.00104		bin26.ctg33596.00104
bin26.ctg33596.00142	MAG: PAS domain-containing protein	bin26.ctg33596.00142	MAG: PAS domain-containing protein	Regulatory & Transport Genes	1e-05
bin26.ctg33596.00348		bin26.ctg33596.00348
bin26.ctg33596.00387		bin26.ctg33596.00387
bin26.ctg33596.00427		bin26.ctg33596.00427
bin26.ctg33596.00427		bin26.ctg33596.02076
bin26.ctg33596.00427		bin26.ctg33596.04287
bin26.ctg33596.00427		bin26.ctg33596.03799
bin26.ctg33596.00503		bin26.ctg33596.00503
bin26.ctg33596.00503		bin11.ctg196704.04471	MAG: ribosome maturation factor RimM	Ribosomal Proteins		1e-05
bin26.ctg33596.00503		bin11.ctg47973.05970	MAG: ribosome maturation factor RimM	Ribosomal Proteins		1e-05
bin26.ctg33596.00636		bin26.ctg33596.00636
bin26.ctg33596.00671	hypothetical protein AP9108_32365	bin26.ctg33596.00671	hypothetical protein AP9108_32365	Hypothetical protein	0.0002
bin26.ctg33596.00719	MAG: diguanylate cyclase	bin26.ctg33596.00719	MAG: diguanylate cyclase	Regulatory & Transport Genes	1e-05
bin26.ctg33596.00756		bin26.ctg33596.00756
bin26.ctg33596.00845	MAG: 50S ribosome-binding GTPase	bin26.ctg33596.00845	MAG: 50S ribosome-binding GTPase		0
bin26.ctg33596.00886	MAG: tRNA 2-thiouridine(34) synthase MnmA	bin26.ctg33596.00886	MAG: tRNA 2-thiouridine(34) synthase MnmA	tRNA	2e-05
bin26.ctg33596.00886	MAG: tRNA 2-thiouridine(34) synthase MnmA	bin11.ctg196704.05102	MAG: tRNA 2-thiouridine(34) synthase MnmA	tRNA		9e-05
bin26.ctg33596.00886	MAG: tRNA 2-thiouridine(34) synthase MnmA	bin13.ctg68176.05312	MAG: tRNA 2-thiouridine(34) synthase MnmA	tRNA			9e-05
bin11.ctg196704.03471	hormogonium polysaccharide biosynthesis protein HpsA	bin11.ctg196704.03471	hormogonium polysaccharide biosynthesis protein HpsA	Photosystems		0.00022
bin11.ctg196704.03509	MAG: hypothetical protein JWS08_14010	bin11.ctg196704.03509	MAG: hypothetical protein JWS08_14010	Hypothetical protein		0.00023
bin11.ctg196704.03560		bin11.ctg196704.03560				4e-05
bin11.ctg196704.03683	MAG: cupin domain-containing protein	bin11.ctg196704.03683	MAG: cupin domain-containing protein	Unknown		2e-05
bin11.ctg196704.03683	MAG: cupin domain-containing protein	bin13.ctg68176.03249	MAG: cupin domain-containing protein	Unknown			2e-05
bin11.ctg196704.03683	MAG: cupin domain-containing protein	bin26.ctg33596.04502
bin11.ctg196704.03758	MAG: nucleotidyltransferase domain-containing protein	bin11.ctg196704.03758	MAG: nucleotidyltransferase domain-containing protein			0
bin11.ctg196704.03797	sensor histidine kinase	bin11.ctg196704.03797	sensor histidine kinase	Regulatory & Transport Genes		3e-05
bin11.ctg196704.03874	GAF domain-containing protein	bin11.ctg196704.03874	GAF domain-containing protein			0
bin11.ctg196704.03917	Ca-binding subtilysin family protease	bin11.ctg196704.03917	Ca-binding subtilysin family protease			0
bin11.ctg196704.03953	MAG: DUF1830 domain-containing protein	bin11.ctg196704.03953	MAG: DUF1830 domain-containing protein	Unknown		0.0008
bin11.ctg196704.04030	MAG: TIGR04376 family protein	bin11.ctg196704.04030	MAG: TIGR04376 family protein	Ribosomally synthesized and post-translationally modified peptide		0.00015
bin11.ctg196704.04077	MAG: DUF4101 domain-containing protein	bin11.ctg196704.04077	MAG: DUF4101 domain-containing protein	Unknown		1e-05
bin11.ctg196704.04116	Tetratricopeptide repeat	bin11.ctg196704.04116	Tetratricopeptide repeat	Defense		4e-05
bin11.ctg196704.04158	MAG: TIGR01548 family HAD-type hydrolase	bin11.ctg196704.04158	MAG: TIGR01548 family HAD-type hydrolase	Modifying enzymes		1e-05
bin11.ctg196704.04285	DEAD/DEAH box helicase	bin11.ctg196704.04285	DEAD/DEAH box helicase	Defense		1e-05
bin11.ctg196704.04327	MAG: hypothetical protein JWS08_19590	bin11.ctg196704.04327	MAG: hypothetical protein JWS08_19590	Hypothetical protein		3e-05
bin11.ctg196704.04327	MAG: hypothetical protein JWS08_19590	bin26.ctg33596.00552
bin11.ctg196704.04364	DUF2281 domain-containing protein	bin11.ctg196704.04364	DUF2281 domain-containing protein	Unknown		2e-05
bin11.ctg196704.04364	DUF2281 domain-containing protein	bin13.ctg68176.04508	DUF2281 domain-containing protein	Unknown			4e-05
bin11.ctg196704.04409	MAG: hypothetical protein JWS08_16415	bin11.ctg196704.04409	MAG: hypothetical protein JWS08_16415	Hypothetical protein		0.00016
bin11.ctg196704.04409	MAG: hypothetical protein JWS08_16415	bin26.ctg33596.05364	MAG: hypothetical protein JWS08_16415	Hypothetical protein	8e-05
bin11.ctg196704.04409	MAG: hypothetical protein JWS08_16415	bin13.ctg68176.03928	MAG: hypothetical protein JWS08_16415	Hypothetical protein			4e-05
bin11.ctg196704.04540	MAG: peroxiredoxin	bin11.ctg196704.04540	MAG: peroxiredoxin	Defense		2e-05
bin11.ctg196704.04540	MAG: peroxiredoxin	bin26.ctg33596.00352
bin11.ctg196704.04578	DUF5682 family protein	bin11.ctg196704.04578	DUF5682 family protein	Unknown		1e-05
bin11.ctg196704.04692	hypothetical protein	bin11.ctg196704.04692	hypothetical protein	Hypothetical protein		0.00017
bin11.ctg196704.04732	phycocyanobilin:ferredoxin oxidoreductase	bin11.ctg196704.04732	phycocyanobilin:ferredoxin oxidoreductase	Photosystems		0
bin11.ctg196704.04817	MAG: DUF4926 domain-containing protein	bin11.ctg196704.04817	MAG: DUF4926 domain-containing protein	Unknown		3e-05
bin11.ctg196704.04817	MAG: DUF4926 domain-containing protein	bin26.ctg33596.00592
bin11.ctg196704.04908		bin11.ctg196704.04908				1e-05
bin11.ctg196704.04951	TPR repeat	bin11.ctg196704.04951	TPR repeat			0
bin11.ctg196704.05214	MAG: NAD(P)H-quinone oxidoreductase subunit 5	bin11.ctg196704.05214	MAG: NAD(P)H-quinone oxidoreductase subunit 5	Citric acid		0.0001
bin11.ctg196704.05214	MAG: NAD(P)H-quinone oxidoreductase subunit 5	bin26.ctg33596.00981	MAG: NAD(P)H-quinone oxidoreductase subunit 5	Citric acid	7e-05
bin11.ctg196704.05399		bin11.ctg196704.05399				2e-05
bin11.ctg196704.05399		bin26.ctg33596.01271
bin11.ctg196704.05440		bin11.ctg196704.05440				0
bin11.ctg196704.05479	ribonuclease III	bin11.ctg196704.05479	ribonuclease III	RNA processing		1e-05
bin11.ctg196704.05515	hypothetical protein	bin11.ctg196704.05515	hypothetical protein	Hypothetical protein		0.00014
bin11.ctg196704.05558	MAG: hypothetical protein JWS08_00860	bin11.ctg196704.05558	MAG: hypothetical protein JWS08_00860	Hypothetical protein		7e-05
bin11.ctg196704.05558	MAG: hypothetical protein JWS08_00860	bin13.ctg68139.00035	hypothetical protein	Hypothetical protein			0.00011
bin11.ctg196704.05558	MAG: hypothetical protein JWS08_00860	bin26.ctg33596.01324
bin11.ctg196704.05714	1,4-alpha-glucan branching enzyme	bin11.ctg196704.05714	1,4-alpha-glucan branching enzyme			4e-05
bin11.ctg196704.05755	MAG: serine/threonine phosphatase	bin11.ctg196704.05755	MAG: serine/threonine phosphatase	Aminoacid biosynthesis		1e-05
bin11.ctg196704.05882	MAG: serine/threonine protein kinase	bin11.ctg196704.05882	MAG: serine/threonine protein kinase	Aminoacid biosynthesis		1e-05
bin11.ctg21486.05947	tRNA epoxyqueuosine(34) reductase QueG	bin11.ctg21486.05947	tRNA epoxyqueuosine(34) reductase QueG	tRNA		1e-05
bin11.ctg53769.05987	methyltransferase domain-containing protein	bin11.ctg53769.05987	methyltransferase domain-containing protein	Methylation		0
bin11.ctg79044.06019	MAG: hypothetical protein JWS08_17220	bin11.ctg79044.06019	MAG: hypothetical protein JWS08_17220	Hypothetical protein		0
bin11.ctg79044.06019	MAG: hypothetical protein JWS08_17220	bin11.ctg196704.04074	MAG: hypothetical protein JWS08_17220	Hypothetical protein		0
bin13.ctg57649.00026	hypothetical protein	bin13.ctg57649.00026	hypothetical protein	Hypothetical protein			3e-05
bin13.ctg57649.00026	hypothetical protein	bin13.ctg68176.04461	hypothetical protein	Hypothetical protein			3e-05
bin13.ctg68139.00069	cation:proton antiporter	bin13.ctg68139.00069	cation:proton antiporter	Transport			0
bin13.ctg68139.00107	quinone-dependent dihydroorotate dehydrogenase	bin13.ctg68139.00107	quinone-dependent dihydroorotate dehydrogenase	Cofactor: Others			7e-05
bin13.ctg68139.00142	HU family DNA-binding protein	bin13.ctg68139.00142	HU family DNA-binding protein	Cell wall			0.00049
bin13.ctg68139.00142	HU family DNA-binding protein	bin26.ctg33596.01455	HU family DNA-binding protein	Cell wall	0.00066
bin13.ctg68139.00142	HU family DNA-binding protein	bin11.ctg196704.05583	HU family DNA-binding protein	Cell wall		0.00044
bin13.ctg68139.00188	tetratricopeptide repeat protein	bin13.ctg68139.00188	tetratricopeptide repeat protein	Defense			0
bin13.ctg68139.00236	S-layer homology domain-containing protein	bin13.ctg68139.00236	S-layer homology domain-containing protein				1e-05
bin13.ctg68139.00302		bin13.ctg68139.00302					2e-05
bin13.ctg68139.00348	methyltransferase domain-containing protein	bin13.ctg68139.00348	methyltransferase domain-containing protein	Methylation			1e-05
bin13.ctg68139.00386	hypothetical protein	bin13.ctg68139.00386	hypothetical protein	Hypothetical protein			3e-05
bin13.ctg68139.00435	hypothetical protein	bin13.ctg68139.00435	hypothetical protein	Hypothetical protein			2e-05
bin13.ctg68139.00479	hypothetical protein HLUCCO16_01030	bin13.ctg68139.00479	hypothetical protein HLUCCO16_01030	Hypothetical protein			0
bin13.ctg68139.00524	hypothetical protein BCD67_18880	bin13.ctg68139.00524	hypothetical protein BCD67_18880	Hypothetical protein			4e-05
bin13.ctg68139.00574	hypothetical protein	bin13.ctg68139.00574	hypothetical protein	Hypothetical protein			4e-05
bin13.ctg68139.00622	cysteine synthase A	bin13.ctg68139.00622	cysteine synthase A	Aminoacid biosynthesis			0
bin13.ctg68139.00622	cysteine synthase A	bin11.ctg196704.00625	cysteine synthase A	Aminoacid biosynthesis		1e-05
bin13.ctg68139.00622	cysteine synthase A	bin26.ctg33596.01843
bin13.ctg68139.00665	DegT/DnrJ/EryC1/StrS family aminotransferase	bin13.ctg68139.00665	DegT/DnrJ/EryC1/StrS family aminotransferase	Aminoacid biosynthesis			3e-05
bin13.ctg68139.00704	hypothetical protein	bin13.ctg68139.00704	hypothetical protein	Hypothetical protein			8e-05
bin13.ctg68139.00743	photosystem I core protein PsaB	bin13.ctg68139.00743	photosystem I core protein PsaB	Photosystems			0.00901
bin13.ctg68139.00743	photosystem I core protein PsaB	bin11.ctg196704.00707	photosystem I chlorophyll a apoprotein A2	Photosystems		0.02051
bin13.ctg68139.00743	photosystem I core protein PsaB	bin26.ctg33596.02189	MAG: photosystem I core protein PsaB	Photosystems	0.00327
bin13.ctg68139.00785	CAP domain-containing protein	bin13.ctg68139.00785	CAP domain-containing protein	Unknown			1e-05
bin13.ctg68139.00837	MAG: hypothetical protein JWS08_03985	bin13.ctg68139.00837	MAG: hypothetical protein JWS08_03985	Hypothetical protein			4e-05
bin13.ctg68139.00837	MAG: hypothetical protein JWS08_03985	bin26.ctg33596.02124
bin13.ctg68139.00877	hypothetical protein	bin13.ctg68139.00877	hypothetical protein	Hypothetical protein			6e-05
bin13.ctg68160.00961	ABC transporter substrate-binding protein	bin13.ctg68160.00961	ABC transporter substrate-binding protein	Regulatory & Transport Genes			0
bin13.ctg68160.01000	MAG: tryptophan synthase subunit beta	bin13.ctg68160.01000	MAG: tryptophan synthase subunit beta	Cofactor: NAD (Niacin/Vitamin B3)			9e-05
bin13.ctg68160.01000	MAG: tryptophan synthase subunit beta	bin26.ctg33596.02218	MAG: tryptophan synthase subunit beta	Cofactor: NAD (Niacin/Vitamin B3)	4e-05
bin13.ctg68160.01000	MAG: tryptophan synthase subunit beta	bin11.ctg196704.00841	MAG: tryptophan synthase subunit beta	Cofactor: NAD (Niacin/Vitamin B3)		6e-05
bin13.ctg68160.01100	MAG: aspartate--tRNA ligase	bin13.ctg68160.01100	MAG: aspartate--tRNA ligase	tRNA			0
bin13.ctg68160.01100	MAG: aspartate--tRNA ligase	bin11.ctg196704.01040	MAG: aspartate--tRNA ligase	tRNA		0
bin13.ctg68160.01100	MAG: aspartate--tRNA ligase	bin26.ctg33596.02354
bin13.ctg68160.01159	protease complex subunit PrcB family protein	bin13.ctg68160.01159	protease complex subunit PrcB family protein	Regulatory & Transport Genes			0.00034
bin13.ctg68160.01195	hypothetical protein	bin13.ctg68160.01195	hypothetical protein	Hypothetical protein			8e-05
bin13.ctg68160.01231	nucleoside:proton symporter	bin13.ctg68160.01231	nucleoside:proton symporter	Transport			3e-05
bin13.ctg68160.01273	SDR family oxidoreductase	bin13.ctg68160.01273	SDR family oxidoreductase	Modifying enzymes			0
bin13.ctg68160.01441	hypothetical protein	bin13.ctg68160.01441	hypothetical protein	Hypothetical protein			2e-05
bin13.ctg68160.01495	2-oxo acid dehydrogenase subunit E2	bin13.ctg68160.01495	2-oxo acid dehydrogenase subunit E2	Cofactor: Others			1e-05
bin13.ctg68160.01532	MAG: C39 family peptidase	bin13.ctg68160.01532	MAG: C39 family peptidase	Ribosomally synthesized and post-translationally modified peptide			1e-05
bin13.ctg68160.01583	7-carboxy-7-deazaguanine synthase QueE	bin13.ctg68160.01583	7-carboxy-7-deazaguanine synthase QueE	Cofactor: Pyrroloquinoline Quinone (PQQ)			1e-05
bin13.ctg68160.01631	sulfiredoxin	bin13.ctg68160.01631	sulfiredoxin				1e-05
bin13.ctg68160.01068		bin13.ctg68160.01068					0.00023
bin13.ctg68160.01170	sulfotransferase domain-containing protein	bin13.ctg68160.01170	sulfotransferase domain-containing protein	Methylation			0
bin13.ctg68160.01202	acyl-CoA dehydrogenase	bin13.ctg68160.01202	acyl-CoA dehydrogenase	Cofactor: Others			0
bin13.ctg68160.01240	MAG: DUF29 family protein	bin13.ctg68160.01240	MAG: DUF29 family protein	Unknown			0
bin13.ctg68160.01283	DUF4214 domain-containing protein	bin13.ctg68160.01283	DUF4214 domain-containing protein	Unknown			1e-05
bin13.ctg68160.01325	adenylate kinase	bin13.ctg68160.01325	adenylate kinase	Other elements			0.00019
bin13.ctg68160.01364	cytochrome c oxidase subunit II	bin13.ctg68160.01364	cytochrome c oxidase subunit II	Respiration			1e-05
bin13.ctg68160.01405	HAD family hydrolase	bin13.ctg68160.01405	HAD family hydrolase	Modifying enzymes			1e-05
bin13.ctg68160.01453	CO2 hydration protein	bin13.ctg68160.01453	CO2 hydration protein				1e-05
bin13.ctg68160.01503	hypothetical protein	bin13.ctg68160.01503	hypothetical protein	Hypothetical protein			0
bin13.ctg68160.01547	MAG: CHASE2 domain-containing protein	bin13.ctg68160.01547	MAG: CHASE2 domain-containing protein	Stress response			1e-05
bin13.ctg68160.01593	hypothetical protein	bin13.ctg68160.01593	hypothetical protein	Hypothetical protein			0.00039
bin13.ctg68160.01640	MAG: leucine-rich repeat domain-containing protein	bin13.ctg68160.01640	MAG: leucine-rich repeat domain-containing protein				0
bin13.ctg68160.01686	iron-sulfur cluster biosynthesis transcriptional regulator SufR	bin13.ctg68160.01686	iron-sulfur cluster biosynthesis transcriptional regulator SufR	Regulatory & Transport Genes			0
bin13.ctg68160.01732	FAD-dependent oxidoreductase	bin13.ctg68160.01732	FAD-dependent oxidoreductase	Regulatory & Transport Genes			1e-05
bin13.ctg68160.01771	sugar ABC transporter substrate-binding protein	bin13.ctg68160.01771	sugar ABC transporter substrate-binding protein	Regulatory & Transport Genes			0
bin13.ctg68160.01822	alpha-amylase	bin13.ctg68160.01822	alpha-amylase				2e-05
bin13.ctg68160.01865	aspartyl protease	bin13.ctg68160.01865	aspartyl protease				1e-05
bin13.ctg68160.01865	aspartyl protease	bin11.ctg196704.01821	aspartyl protease			0
bin13.ctg68160.01865	aspartyl protease	bin26.ctg33596.03089
bin13.ctg68160.01910	MAG: DUF2834 domain-containing protein	bin13.ctg68160.01910	MAG: DUF2834 domain-containing protein	Unknown			5e-05
bin13.ctg68160.01910	MAG: DUF2834 domain-containing protein	bin26.ctg33596.03534
bin13.ctg68160.01997	hypothetical protein BI308_20280	bin13.ctg68160.01997	hypothetical protein BI308_20280	Hypothetical protein			0
bin13.ctg68160.02038	PAS domain S-box protein	bin13.ctg68160.02038	PAS domain S-box protein	Regulatory & Transport Genes			0
bin13.ctg68160.02124	heterocyst differentiation protein HetZ	bin13.ctg68160.02124	heterocyst differentiation protein HetZ				0
bin13.ctg68160.02162	hypothetical protein	bin13.ctg68160.02162	hypothetical protein	Hypothetical protein			0
bin13.ctg68160.02206	nickel pincer cofactor biosynthesis protein LarC	bin13.ctg68160.02206	nickel pincer cofactor biosynthesis protein LarC				1e-05
bin13.ctg68160.02260	pentapeptide repeat-containing protein	bin13.ctg68160.02260	pentapeptide repeat-containing protein	Resistance Genes			1e-05
bin13.ctg68160.02260	pentapeptide repeat-containing protein	bin11.ctg196704.01997	pentapeptide repeat-containing protein	Resistance Genes		0
bin13.ctg68160.02306	putative Fe-S-cluster oxidoreductase	bin13.ctg68160.02306	putative Fe-S-cluster oxidoreductase	Regulatory & Transport Genes			1e-05
bin13.ctg68176.02395	hypothetical protein	bin13.ctg68176.02395	hypothetical protein	Hypothetical protein			0.00142
bin13.ctg68176.02395	hypothetical protein	bin13.ctg68160.02329	hypothetical protein	Hypothetical protein			0.00143
bin13.ctg68176.02478	hypothetical protein	bin13.ctg68176.02478	hypothetical protein	Hypothetical protein			1e-05
bin13.ctg68176.02478	hypothetical protein	bin11.ctg196704.02291	hypothetical protein	Hypothetical protein		2e-05
bin13.ctg68176.02523	hypothetical protein	bin13.ctg68176.02523	hypothetical protein	Hypothetical protein			3e-05
bin13.ctg68176.02566	type II toxin-antitoxin system RelE/ParE family toxin	bin13.ctg68176.02566	type II toxin-antitoxin system RelE/ParE family toxin	Toxin antitoxin			1e-05
bin13.ctg68176.02610	phosphotransacetylase family protein	bin13.ctg68176.02610	phosphotransacetylase family protein				2e-05
bin13.ctg68176.02649	hypothetical protein	bin13.ctg68176.02649	hypothetical protein	Hypothetical protein			4e-05
bin13.ctg68176.02690	tetratricopeptide repeat protein	bin13.ctg68176.02690	tetratricopeptide repeat protein	Defense			1e-05
bin13.ctg68176.02736	glutamate synthase large subunit	bin13.ctg68176.02736	glutamate synthase large subunit	Aminoacid biosynthesis			3e-05
bin13.ctg68176.02784	1-acyl-sn-glycerol-3-phosphate acyltransferase	bin13.ctg68176.02784	1-acyl-sn-glycerol-3-phosphate acyltransferase	Non-ribisomal peptide synthetase			5e-05
bin13.ctg68176.02784	1-acyl-sn-glycerol-3-phosphate acyltransferase	bin26.ctg33596.03908	MAG: 1-acyl-sn-glycerol-3-phosphate acyltransferase	Non-ribisomal peptide synthetase	0.00014
bin13.ctg68176.02867	tetratricopeptide repeat protein	bin13.ctg68176.02867	tetratricopeptide repeat protein	Defense			5e-05
bin13.ctg68176.02913	MAG: RNA methyltransferase	bin13.ctg68176.02913	MAG: RNA methyltransferase	Methylation			0
bin13.ctg68176.02952	DNA-directed RNA polymerase subunit omega	bin13.ctg68176.02952	DNA-directed RNA polymerase subunit omega	RNA processing			1e-05
bin13.ctg68176.02952	DNA-directed RNA polymerase subunit omega	bin11.ctg196704.02822	DNA-directed RNA polymerase subunit omega	RNA processing		1e-05
bin13.ctg68176.02952	DNA-directed RNA polymerase subunit omega	bin26.ctg33596.04088
bin13.ctg68176.02999	putative membrane protein	bin13.ctg68176.02999	putative membrane protein				0
bin13.ctg68176.03098	nitrate reductase associated protein	bin13.ctg68176.03098	nitrate reductase associated protein	Nitrogen cycle			0.00013
bin13.ctg68176.03140		bin13.ctg68176.03140					0
bin13.ctg68176.03176	Uma2 family endonuclease	bin13.ctg68176.03176	Uma2 family endonuclease	RNA processing			2e-05
bin13.ctg68176.03216	RNA-guided endonuclease TnpB family protein	bin13.ctg68176.03216	RNA-guided endonuclease TnpB family protein	Regulatory & Transport Genes			0.00026
bin13.ctg68176.03286	orotate phosphoribosyltransferase	bin13.ctg68176.03286	orotate phosphoribosyltransferase	Cofactor: Riboflavin (Vitamin B2)			1e-05
bin13.ctg68176.03417	glycosyltransferase family 2 protein	bin13.ctg68176.03417	glycosyltransferase family 2 protein	Modifying enzymes			1e-05
bin13.ctg68176.03508	glycogen debranching enzyme family protein	bin13.ctg68176.03508	glycogen debranching enzyme family protein				2e-05
bin13.ctg68176.03546		bin13.ctg68176.03546					0
bin13.ctg68176.03599	hypothetical protein E1H12_13480	bin13.ctg68176.03599	hypothetical protein E1H12_13480	Hypothetical protein			2e-05
bin13.ctg68176.03750	tetratricopeptide repeat protein	bin13.ctg68176.03750	tetratricopeptide repeat protein	Defense			1e-05
bin13.ctg68176.03866	caspase family protein	bin13.ctg68176.03866	caspase family protein	Defense			1e-05
bin13.ctg68176.04087	DEAD/DEAH box helicase family protein	bin13.ctg68176.04087	DEAD/DEAH box helicase family protein	Defense			0
bin13.ctg68176.04087	DEAD/DEAH box helicase family protein	bin26.ctg33596.05228
bin13.ctg68176.04087	DEAD/DEAH box helicase family protein	bin11.ctg196704.03395	MAG: DEAD/DEAH box helicase	Defense		1e-05
bin13.ctg68176.04131	plastocyanin	bin13.ctg68176.04131	plastocyanin	Respiration			0.0003
bin13.ctg68176.04185	MAG: hypothetical protein JWS08_16645	bin13.ctg68176.04185	MAG: hypothetical protein JWS08_16645	Hypothetical protein			2e-05
bin13.ctg68176.04227	S-layer homology domain-containing protein	bin13.ctg68176.04227	S-layer homology domain-containing protein				2e-05
bin13.ctg68176.04272	ABC transporter substrate-binding protein	bin13.ctg68176.04272	ABC transporter substrate-binding protein	Regulatory & Transport Genes			0
bin13.ctg68176.04308	hypothetical protein HLUCCO16_15545	bin13.ctg68176.04308	hypothetical protein HLUCCO16_15545	Hypothetical protein			0.0026
bin13.ctg68176.04351	MAG: alanine--tRNA ligase	bin13.ctg68176.04351	MAG: alanine--tRNA ligase	tRNA			5e-05
bin13.ctg68176.04351	MAG: alanine--tRNA ligase	bin11.ctg196704.04039	MAG: alanine--tRNA ligase	tRNA		5e-05
bin13.ctg68176.04351	MAG: alanine--tRNA ligase	bin26.ctg33596.05589	MAG: alanine--tRNA ligase	tRNA	4e-05
bin13.ctg68176.04393	DUF4079 domain-containing protein	bin13.ctg68176.04393	DUF4079 domain-containing protein	Unknown			2e-05
bin13.ctg68176.04432	MAG: S8 family serine peptidase	bin13.ctg68176.04432	MAG: S8 family serine peptidase	Aminoacid biosynthesis			1e-05
bin13.ctg68176.04522	hypothetical protein HLUCCO16_06070	bin13.ctg68176.04522	hypothetical protein HLUCCO16_06070	Hypothetical protein			1e-05
bin13.ctg68176.04576	putative ABC efflux pump	bin13.ctg68176.04576	putative ABC efflux pump	Regulatory & Transport Genes			0
bin13.ctg68176.04623	5'/3'-nucleotidase SurE	bin13.ctg68176.04623	5'/3'-nucleotidase SurE	Nitrogen cycle			1e-05
bin13.ctg68176.04661	trypsin-like peptidase domain-containing protein	bin13.ctg68176.04661	trypsin-like peptidase domain-containing protein	Stress response			3e-05
bin13.ctg68176.04744	glycerate kinase	bin13.ctg68176.04744	glycerate kinase				1e-05
bin13.ctg68176.04833	protein kinase	bin13.ctg68176.04833	protein kinase				1e-05
bin13.ctg68176.04874	ABC transporter ATP-binding protein	bin13.ctg68176.04874	ABC transporter ATP-binding protein	Regulatory & Transport Genes			1e-05
bin13.ctg68176.04913	MAG: ParA family protein	bin13.ctg68176.04913	MAG: ParA family protein				0
bin13.ctg68176.05013	MAG: hypothetical protein JWS08_19830	bin13.ctg68176.05013	MAG: hypothetical protein JWS08_19830	Hypothetical protein			2e-05
bin13.ctg68176.05055	MAG: glycosyltransferase family 2 protein	bin13.ctg68176.05055	MAG: glycosyltransferase family 2 protein	Modifying enzymes			0
bin13.ctg68176.05055	MAG: glycosyltransferase family 2 protein	bin11.ctg196704.04861	MAG: glycosyltransferase family 2 protein	Modifying enzymes		0
bin13.ctg68176.05148	MAG: phosphodiester glycosidase family protein	bin13.ctg68176.05148	MAG: phosphodiester glycosidase family protein	Siderophore			1e-05
bin13.ctg68176.05188	ATP-binding cassette domain-containing protein	bin13.ctg68176.05188	ATP-binding cassette domain-containing protein	Defense			1e-05
bin13.ctg68176.05230	carboxypeptidase-like regulatory domain-containing protein	bin13.ctg68176.05230	carboxypeptidase-like regulatory domain-containing protein	Peptidoglycan Remodeling			1e-05
bin13.ctg68176.05295	DUF928 domain-containing protein	bin13.ctg68176.05295	DUF928 domain-containing protein	Unknown			1e-05
bin13.ctg68176.05345	SGNH/GDSL hydrolase family protein	bin13.ctg68176.05345	SGNH/GDSL hydrolase family protein	Modifying enzymes			1e-05
bin13.ctg68176.05468	glucokinase	bin13.ctg68176.05468	glucokinase	Glycolysis			1e-05
bin26.ctg33596.03517	MAG: Photosystem II manganese-stabilizing polypeptide	bin26.ctg33596.03517	MAG: Photosystem II manganese-stabilizing polypeptide	Photosystems	0.00012
bin26.ctg33596.03597	30S ribosomal protein S12	bin26.ctg33596.03597	30S ribosomal protein S12	Ribosomal Proteins	2e-05
bin26.ctg33596.03597	30S ribosomal protein S12	bin13.ctg68176.02463	30S ribosomal protein S12	Ribosomal Proteins			0.0004
bin26.ctg33596.03597	30S ribosomal protein S12	bin11.ctg196704.02309	30S ribosomal protein S12	Ribosomal Proteins		0.00027
bin26.ctg33596.03631		bin26.ctg33596.03631
bin26.ctg33596.03631		bin11.ctg196704.02436	MAG: hypothetical protein JWS08_10295	Hypothetical protein		9e-05
bin26.ctg33596.03802		bin26.ctg33596.03802
bin26.ctg33596.03802		bin26.ctg33596.04081
bin26.ctg33596.03840	MAG: DUF962 domain-containing protein	bin26.ctg33596.03840	MAG: DUF962 domain-containing protein	Unknown	0.00013
bin26.ctg33596.03840	MAG: DUF962 domain-containing protein	bin11.ctg196704.02576	MAG: DUF962 domain-containing protein	Unknown		6e-05
bin26.ctg33596.03840	MAG: DUF962 domain-containing protein	bin13.ctg68176.02708	MAG: DUF962 domain-containing protein	Unknown			4e-05
bin26.ctg33596.03934		bin26.ctg33596.03934
bin26.ctg33596.03970		bin26.ctg33596.03970
bin26.ctg33596.04053	MAG: DUF3326 domain-containing protein	bin26.ctg33596.04053	MAG: DUF3326 domain-containing protein	Unknown	7e-05
bin26.ctg33596.04053	MAG: DUF3326 domain-containing protein	bin13.ctg68176.02917	MAG: DUF3326 domain-containing protein	Unknown			2e-05
bin26.ctg33596.04135		bin26.ctg33596.04135
bin26.ctg33596.04135		bin13.ctg68176.03000	hypothetical protein E1H12_20250	Hypothetical protein			0
bin26.ctg33596.04182		bin26.ctg33596.04182
bin26.ctg33596.04301	MAG: LysR family transcriptional regulator	bin26.ctg33596.04301	MAG: LysR family transcriptional regulator	Regulatory & Transport Genes	4e-05
bin26.ctg33596.04301	MAG: LysR family transcriptional regulator	bin11.ctg196704.02964	MAG: LysR family transcriptional regulator	Regulatory & Transport Genes		2e-05
bin26.ctg33596.04350	MAG: PHP domain-containing protein	bin26.ctg33596.04350	MAG: PHP domain-containing protein		3e-05
bin26.ctg33596.04350	MAG: PHP domain-containing protein	bin11.ctg196704.02898	MAG: PHP domain-containing protein			4e-05
bin26.ctg33596.04350	MAG: PHP domain-containing protein	bin13.ctg68176.03046	MAG: PHP domain-containing protein				2e-05
bin26.ctg33596.04389		bin26.ctg33596.04389
bin26.ctg33596.04389		bin11.ctg196704.03795	MAG: sugar ABC transporter permease	Regulatory & Transport Genes		3e-05
bin26.ctg33596.04430	MAG: transporter substrate-binding domain-containing protein	bin26.ctg33596.04430	MAG: transporter substrate-binding domain-containing protein	Transport	3e-05
bin26.ctg33596.04430	MAG: transporter substrate-binding domain-containing protein	bin11.ctg196704.03753	MAG: transporter substrate-binding domain-containing protein	Transport		0.0001
[truncated: 11,024 more rows]

## Sheet: S9
Supplementary table S9: Biosynthetic gene clusters identified via antiSMASH in three Sodalinema MAGs generated in this study
GE-Bin11
[truncated: 322 more rows]

[truncated: 14 more sheets: S10, S11, S12, S13, S14, S15, S16, S17, S18, S19, S20, S21, S22, S23]
